# Supplementary material for: Genome-Wide DNA Methylation and Hydroxymethylation Changes Revealed Epigenetic Regulation of Neuromodulation and Myelination in Yak Hypothalamus
Source: Front Genet. 2021 Sep 27;12:592135. doi: 10.3389/fgene.2021.592135 (PMC8503545; doi:10.3389/fgene.2021.592135)
Supplement: Supplementary file 6 [file Table_5.XLSX]

## Sheet: Table S5
Supplementary Table 5. List of DhMRs of each comparision group in cattle
Comparision group A-vs-B	chromosome	DhMR start	DhMR end	Difference of DhMR	# of CpGs	Kolmogorov-Smirnov-Test p-value	Mann-Whitney-U-Test p-value	hydroxymethylation of A	hydroxymethylation of B	location of DhMRs
										upstream 2k	5-UTR	CDS	intron	3-UTR	downstream2k
hypothalamus-VS-cerebellum	AC_000187.1	39898888	39899184	0.157329	8	0.006993	0.04583	0.27482	0.11749	--	--	--	--	--	--
hypothalamus-VS-cerebellum	AC_000187.1	39908867	39909133	0.142023	5	0.015873	0.0099706	0.2811	0.13908	--	--	--	--	--	--
hypothalamus-VS-cerebellum	AC_000187.1	105235753	105235841	0.25652	5	0.0079365	0.0060558	0.58462	0.3281	--	--	--	--	--	--
hypothalamus-VS-cerebellum	AC_000187.1	134994905	134994999	0.197279	7	0.00058275	0.00078965	0.39098	0.1937	--	--	--	--	--	--
hypothalamus-VS-cerebellum	AC_000187.1	143829434	143829581	-0.121388	8	0.004662	0.024627	0.16605	0.28744	--	--	--	--	--	--
hypothalamus-VS-cerebellum	AC_000187.1	143903850	143904009	-0.106468	5	0.0079365	0.014535	0.16643	0.2729	--	--	--	--	--	--
hypothalamus-VS-cerebellum	AC_000187.1	144449806	144449983	0.132076	7	0.011072	0.0022455	0.32452	0.19245	--	--	--	--	--	--
hypothalamus-VS-cerebellum	AC_000187.1	144575469	144575551	0.337781	5	0.015873	0.011853	0.65096	0.31318	--	--	--	--	--	--
hypothalamus-VS-cerebellum	AC_000187.1	146803679	146803734	0.182857	5	0.0079365	0.013904	0.53143	0.34857	--	--	--	--	--	--
hypothalamus-VS-cerebellum	AC_000187.1	146832355	146832622	0.188202	5	0.015873	0.041279	0.34691	0.15871	--	--	--	--	--	--
hypothalamus-VS-cerebellum	AC_000187.1	146836205	146836248	0.174224	5	0.0079365	0.00070146	0.41725	0.24303	--	--	--	--	--	--
hypothalamus-VS-cerebellum	AC_000187.1	148799238	148799348	0.126745	5	0.0079365	0.0052004	0.37835	0.25161	--	--	--	--	--	--
hypothalamus-VS-cerebellum	NW_003099167.1	159510	159781	0.178717	5	0.031746	0.043987	0.36892	0.19021	--	--	--	--	--	--
hypothalamus-VS-cerebellum	NW_003099179.1	70141	70281	0.222636	5	0.015873	0.012765	0.2436	0.02096	--	--	--	--	--	--
hypothalamus-VS-cerebellum	NW_003099180.1	23910	24077	0.169481	12	0.0018298	0.010388	0.30802	0.13854	--	--	--	--	--	--
hypothalamus-VS-cerebellum	NW_003099180.1	33074	33521	0.204237	12	5.1772e-06	0.0023283	0.36846	0.16423	--	--	--	--	--	--
hypothalamus-VS-cerebellum	NW_003099182.1	11008	11210	0.122836	6	0.0021645	0.01394	0.27464	0.15181	--	--	--	--	--	--
hypothalamus-VS-cerebellum	NW_003099185.1	5118	5234	0.26126	6	0.015152	0.015254	0.52483	0.26357	--	--	--	--	--	--
hypothalamus-VS-cerebellum	NW_003099185.1	22631	22721	0.315335	5	0.0079365	0.011554	0.50831	0.19298	--	--	--	--	--	--
hypothalamus-VS-cerebellum	NW_003099185.1	29840	30123	0.12277	7	0.017483	0.017207	0.39471	0.27194	--	--	--	--	--	--
hypothalamus-VS-cerebellum	NW_003099188.1	32273	32363	0.312307	6	0.0021645	0.042344	0.41945	0.10714	--	--	--	--	--	--
hypothalamus-VS-cerebellum	NW_003099188.1	51040	51221	0.181839	6	0.004329	0.004001	0.39084	0.209	--	--	--	--	--	--
hypothalamus-VS-cerebellum	NW_003099189.1	21295	21371	0.114822	6	0.025974	0.0044955	0.36784	0.25302	--	--	--	--	--	--
hypothalamus-VS-cerebellum	NW_003100231.1	2769	3235	0.189019	5	0.015873	0.045721	0.46812	0.27911	--	--	--	--	--	--
hypothalamus-VS-cerebellum	NW_003100231.1	17103	17193	0.230288	5	0.015873	0.01085	0.41689	0.1866	--	--	--	--	--	--
hypothalamus-VS-cerebellum	NW_003100254.1	1357	1432	0.191067	5	0.031746	0.036269	0.33084	0.13977	--	--	--	--	--	--
hypothalamus-VS-cerebellum	NW_003100254.1	4929	5369	0.214595	14	0.00011357	0.00019463	0.39674	0.18215	--	--	--	--	--	--
hypothalamus-VS-cerebellum	NW_003100262.1	1424	1637	0.173599	9	4.1135e-05	0.0022959	0.35909	0.18549	--	--	--	--	--	--
hypothalamus-VS-cerebellum	NW_003100262.1	2166	2318	0.338474	7	0.00058275	0.001853	0.5479	0.20942	--	--	--	--	--	--
hypothalamus-VS-cerebellum	NW_003100263.1	91	176	0.188712	6	0.008658	0.015862	0.49471	0.306	--	--	--	--	--	--
hypothalamus-VS-cerebellum	NW_003100269.1	10085	10191	0.104446	6	0.004329	0.0021726	0.32771	0.22326	--	--	--	--	--	--
hypothalamus-VS-cerebellum	NW_003100463.1	314	429	0.244229	9	0.0077746	0.0028449	0.46155	0.21732	--	--	--	--	--	--
hypothalamus-VS-cerebellum	NW_003100463.1	1158	1260	0.177924	7	0.026224	0.01597	0.41922	0.2413	--	--	--	--	--	--
hypothalamus-VS-cerebellum	NW_003100871.1	6901	7186	0.147483	6	0.0021645	0.0078382	0.35326	0.20578	--	--	--	--	--	--
hypothalamus-VS-cerebellum	NW_003100872.1	3921	4063	0.323196	5	0.0079365	0.0047451	0.65146	0.32826	--	--	--	--	--	--
hypothalamus-VS-cerebellum	NW_003100874.1	5152	5473	0.228078	5	0.0079365	0.0035507	0.48712	0.25904	--	--	--	--	--	--
hypothalamus-VS-cerebellum	NW_003100874.1	12099	12210	0.163706	5	0.015873	0.034353	0.34646	0.18275	--	--	--	--	--	--
hypothalamus-VS-cerebellum	NW_003100881.1	9350	9727	0.44536	5	0.015873	0.026392	0.74052	0.29516	--	--	--	--	--	--
hypothalamus-VS-cerebellum	NW_003100881.1	10652	10801	0.203258	11	2.8351e-06	0.00016942	0.36785	0.16459	--	--	--	--	--	--
hypothalamus-VS-cerebellum	NW_003100883.1	22698	22964	0.16407	16	2.8709e-05	0.0016447	0.3682	0.20413	--	--	--	--	--	--
hypothalamus-VS-cerebellum	chr1	655102	655144	0.277308	5	0.0079365	0.0011564	0.58311	0.30581	--	--	--	--	--	--
hypothalamus-VS-cerebellum	chr1	1254161	1254189	0.284637	5	0.0079365	0.0037853	0.57573	0.29109	--	--	SON	--	--	--
hypothalamus-VS-cerebellum	chr1	3356038	3356399	0.248374	6	0.0021645	0.0011943	0.51417	0.26579	--	--	--	--	--	--
hypothalamus-VS-cerebellum	chr1	8847945	8848057	0.205029	6	0.008658	0.042049	0.38701	0.18198	--	--	ADAMTS5	--	--	--
hypothalamus-VS-cerebellum	chr1	44845654	44846020	0.190992	12	3.3282e-05	0.0010812	0.41515	0.22416	--	--	--	--	--	--
hypothalamus-VS-cerebellum	chr1	58452850	58452879	0.301437	5	0.0079365	0.0034296	0.5381	0.23666	--	--	BOC	--	--	--
hypothalamus-VS-cerebellum	chr1	59457791	59458143	0.209571	8	0.006993	0.018811	0.56111	0.35153	--	--	--	--	--	--
hypothalamus-VS-cerebellum	chr1	61266964	61267070	0.161855	5	0.015873	0.010537	0.31172	0.14986	--	--	--	LSAMP	--	--
hypothalamus-VS-cerebellum	chr1	67852347	67852709	0.158643	10	0.01469	0.028928	0.3173	0.15866	--	--	--	--	--	--
hypothalamus-VS-cerebellum	chr1	69811128	69811301	0.204275	7	0.0040793	0.0024685	0.422	0.21773	--	--	--	ITGB5	--	--
hypothalamus-VS-cerebellum	chr1	69899390	69899626	0.129382	5	0.015873	0.003009	0.26921	0.13983	--	--	ITGB5	--	--	--
hypothalamus-VS-cerebellum	chr1	71210018	71210840	0.173877	20	7.1118e-06	0.00052784	0.41853	0.24466	--	--	TNK2	--	--	--
hypothalamus-VS-cerebellum	chr1	71245846	71246029	0.132176	5	0.0079365	0.011414	0.34774	0.21556	--	--	--	--	--	--
hypothalamus-VS-cerebellum	chr1	80225392	80225496	0.296435	6	0.015152	0.018145	0.42096	0.12453	--	--	RTP2	--	--	--
hypothalamus-VS-cerebellum	chr1	81208973	81209062	-0.12419	5	0.015873	0.010042	0.17883	0.30302	--	AHSG	AHSG	--	--	--
hypothalamus-VS-cerebellum	chr1	83450282	83450324	0.216218	5	0.0079365	0.0080891	0.46564	0.24942	--	--	CLCN2	--	--	--
hypothalamus-VS-cerebellum	chr1	83456659	83456789	0.2608	5	0.0079365	0.002607	0.44218	0.18138	--	--	CLCN2	--	--	FAM131A
hypothalamus-VS-cerebellum	chr1	84441520	84441903	0.195888	11	3.4022e-05	0.0027896	0.34116	0.14527	--	--	--	--	--	--
hypothalamus-VS-cerebellum	chr1	111644998	111645067	0.287231	5	0.0079365	0.002856	0.50218	0.21495	--	--	--	--	--	--
hypothalamus-VS-cerebellum	chr1	121893466	121893670	0.259797	7	0.00058275	0.001818	0.46085	0.20105	--	--	--	--	--	--
hypothalamus-VS-cerebellum	chr1	121905468	121905550	0.219391	5	0.015873	0.013342	0.38425	0.16486	--	--	--	--	--	--
hypothalamus-VS-cerebellum	chr1	128901395	128901595	0.173625	8	0.028127	0.041037	0.38305	0.20943	--	--	SPSB4	--	--	--
hypothalamus-VS-cerebellum	chr1	135569364	135569407	0.386127	5	0.0079365	0.0031512	0.64766	0.26153	--	--	--	EPHB1	--	--
hypothalamus-VS-cerebellum	chr1	136598482	136598662	0.185692	5	0.031746	0.045525	0.42309	0.2374	--	--	--	RAB6B	--	--
hypothalamus-VS-cerebellum	chr1	143597633	143598002	0.428817	8	0.0001554	0.0008168	0.56652	0.13771	--	--	--	--	--	--
hypothalamus-VS-cerebellum	chr1	144428417	144428528	0.252722	5	0.0079365	0.035296	0.48409	0.23137	--	--	--	--	--	--
hypothalamus-VS-cerebellum	chr1	144752802	144752884	0.323783	5	0.0079365	0.0011415	0.53414	0.21036	--	--	--	PKNOX1	--	--
hypothalamus-VS-cerebellum	chr1	145107030	145107160	0.112204	8	0.0018648	0.034611	0.25913	0.14692	--	--	ITGB2	--	--	--
hypothalamus-VS-cerebellum	chr1	145114745	145114916	0.192569	5	0.0079365	0.0038877	0.37369	0.18112	--	--	--	ITGB2	--	--
hypothalamus-VS-cerebellum	chr1	145124243	145124449	0.249731	9	0.00028795	0.005888	0.44563	0.1959	--	ITGB2	--	ITGB2	--	--
hypothalamus-VS-cerebellum	chr1	145180354	145180535	0.187489	9	0.018758	0.031008	0.397	0.20951	--	--	--	--	--	FAM207A
hypothalamus-VS-cerebellum	chr1	145186554	145186611	0.182412	5	0.031746	0.029908	0.34562	0.16321	--	--	--	--	--	--
hypothalamus-VS-cerebellum	chr1	145522483	145522573	0.194763	8	0.010412	0.0063604	0.37374	0.17898	--	--	--	--	--	--
hypothalamus-VS-cerebellum	chr1	145596748	145596957	0.217782	5	0.015873	0.012679	0.44966	0.23188	--	--	--	--	--	POFUT2
hypothalamus-VS-cerebellum	chr1	145597189	145597713	0.15825	12	0.010045	0.0209	0.3138	0.15555	--	--	POFUT2	POFUT2	POFUT2	--
hypothalamus-VS-cerebellum	chr1	145774365	145774436	0.164582	5	0.0079365	0.016732	0.35798	0.1934	--	--	--	PFKL	--	--
hypothalamus-VS-cerebellum	chr1	146036567	146036807	0.181945	6	0.008658	0.014811	0.3495	0.16755	TSPEAR	--	--	--	--	--
hypothalamus-VS-cerebellum	chr1	146514893	146515055	0.307874	5	0.0079365	0.010116	0.44648	0.13861	--	--	--	PDXK	--	--
hypothalamus-VS-cerebellum	chr1	146517324	146517664	0.353509	6	0.008658	0.01465	0.56907	0.21556	--	--	--	--	--	PDXK
hypothalamus-VS-cerebellum	chr1	146598667	146598913	0.284852	5	0.0079365	0.00092598	0.5219	0.23705	--	--	--	--	--	--
hypothalamus-VS-cerebellum	chr1	146821022	146821176	0.242417	5	0.0079365	0.0032815	0.54054	0.29813	--	--	TRAPPC10	--	--	--
hypothalamus-VS-cerebellum	chr1	146864051	146864350	0.296565	5	0.0079365	0.0036559	0.42203	0.12546	--	--	GATD3A	--	--	--
hypothalamus-VS-cerebellum	chr1	146989892	146990015	0.264503	5	0.0079365	0.015754	0.42177	0.15726	--	--	--	COL18A1	--	--
hypothalamus-VS-cerebellum	chr1	147054657	147055018	0.21819	5	0.0079365	0.0022964	0.48065	0.26246	--	--	--	SLC19A1	--	--
hypothalamus-VS-cerebellum	chr1	147351888	147351982	0.259448	5	0.0079365	0.0067241	0.43017	0.17072	--	--	--	PCBP3	--	--
hypothalamus-VS-cerebellum	chr1	147352290	147352424	0.212976	8	0.0029526	0.016814	0.38628	0.1733	--	--	--	PCBP3	--	--
hypothalamus-VS-cerebellum	chr1	147585109	147585341	0.278138	5	0.0079365	0.021412	0.45761	0.17947	--	--	FTCD	--	--	--
hypothalamus-VS-cerebellum	chr1	147890978	147891176	0.261343	10	2.165e-05	0.0010687	0.46755	0.20621	--	--	--	--	--	--
hypothalamus-VS-cerebellum	chr1	147945688	147945804	0.328631	7	0.00058275	0.0016227	0.56198	0.23335	--	--	--	--	--	--
hypothalamus-VS-cerebellum	chr1	148284678	148284793	0.226161	5	0.0079365	0.011659	0.47938	0.25322	--	--	--	FBXO25	--	--
hypothalamus-VS-cerebellum	chr1	150776225	150776410	0.187263	8	0.0010878	0.014447	0.39454	0.20728	--	--	--	--	--	--
hypothalamus-VS-cerebellum	chr1	153314376	153314599	0.146316	12	0.0055596	0.011152	0.2661	0.11978	--	--	PIK3R4	--	--	--
hypothalamus-VS-cerebellum	chr1	154030032	154030104	0.289743	7	0.017483	0.017663	0.49876	0.20901	--	--	--	SH3BP5	--	--
hypothalamus-VS-cerebellum	chr1	154037029	154037363	0.229299	9	8.2271e-05	0.00084181	0.40965	0.18035	--	--	--	SH3BP5	--	--
hypothalamus-VS-cerebellum	chr1	154221278	154221404	0.300983	5	0.015873	0.034308	0.49756	0.19658	--	--	--	COLQ	--	--
hypothalamus-VS-cerebellum	chr1	154221673	154221778	0.218033	6	0.0021645	0.012939	0.37857	0.16054	--	--	--	COLQ	--	--
hypothalamus-VS-cerebellum	chr1	154222455	154222652	0.145364	5	0.031746	0.040582	0.28314	0.13778	--	--	--	COLQ	--	--
hypothalamus-VS-cerebellum	chr1	154395021	154395139	0.17997	6	0.041126	0.042209	0.48693	0.30696	--	BTD	--	BTD	--	--
hypothalamus-VS-cerebellum	chr1	154404864	154404941	0.350091	8	0.0003108	0.0065387	0.52528	0.17519	--	--	--	BTD	--	--
hypothalamus-VS-cerebellum	chr1	155147491	155147811	0.312661	7	0.0040793	0.014647	0.59132	0.27866	--	--	--	OXNAD1	--	--
hypothalamus-VS-cerebellum	chr1	155282764	155282935	0.151142	5	0.015873	0.012688	0.29444	0.14329	--	--	--	--	--	--
hypothalamus-VS-cerebellum	chr1	155675984	155676086	0.301877	8	0.0001554	0.00067864	0.4679	0.16603	--	--	--	PLCL2	--	--
hypothalamus-VS-cerebellum	chr1	155685612	155685787	-0.144518	6	0.041126	0.030532	0.10471	0.24923	--	--	--	PLCL2	--	--
hypothalamus-VS-cerebellum	chr1	155700147	155700268	0.214645	8	0.0029526	0.0028656	0.47056	0.25592	--	--	--	PLCL2	--	--
hypothalamus-VS-cerebellum	chr1	155701922	155702190	0.294827	5	0.0079365	0.0028452	0.51354	0.21872	--	--	--	PLCL2	--	--
hypothalamus-VS-cerebellum	chr1	155729527	155729628	0.3485	7	0.0011655	0.00064691	0.56444	0.21594	--	--	--	PLCL2	--	--
hypothalamus-VS-cerebellum	chr1	155753902	155754149	0.242497	5	0.0079365	0.020735	0.32047	0.077969	--	--	--	PLCL2	--	--
hypothalamus-VS-cerebellum	chr1	155763718	155763810	0.188082	5	0.0079365	0.0047053	0.4104	0.22232	--	--	--	PLCL2	--	--
hypothalamus-VS-cerebellum	chr1	155773323	155773448	0.343768	5	0.0079365	0.0029875	0.58884	0.24507	--	--	--	PLCL2	--	--
hypothalamus-VS-cerebellum	chr1	155775931	155776035	0.237776	5	0.0079365	0.013201	0.4067	0.16893	--	--	--	PLCL2	--	--
hypothalamus-VS-cerebellum	chr1	155776039	155776247	0.128807	12	0.002914	0.039155	0.30598	0.17717	--	--	--	PLCL2	--	--
hypothalamus-VS-cerebellum	chr1	155802497	155802538	0.174186	5	0.015873	0.014114	0.3154	0.14121	--	--	--	PLCL2	--	--
hypothalamus-VS-cerebellum	chr1	156247628	156247944	0.225081	12	0.00085794	0.021111	0.39159	0.16651	--	TBC1D5	--	TBC1D5	--	--
hypothalamus-VS-cerebellum	chr10	12005113	12005325	-0.12461	5	0.0079365	0.014523	0.13798	0.26259	--	--	--	--	--	--
hypothalamus-VS-cerebellum	chr10	12238960	12239114	0.150882	5	0.015873	0.034784	0.32802	0.17713	--	--	--	--	--	--
hypothalamus-VS-cerebellum	chr10	12852251	12852311	0.190112	5	0.015873	0.035368	0.48217	0.29206	--	--	--	--	--	--
hypothalamus-VS-cerebellum	chr10	13617693	13617773	0.283158	7	0.002331	0.0054224	0.53402	0.25086	--	--	--	--	--	--
hypothalamus-VS-cerebellum	chr10	13638376	13638434	0.18956	7	0.00058275	0.0020213	0.33468	0.14512	--	--	--	--	--	--
hypothalamus-VS-cerebellum	chr10	13958487	13959084	0.10098	8	0.014763	0.043232	0.33333	0.23235	--	--	SMAD3	SMAD3	--	--
hypothalamus-VS-cerebellum	chr10	15594864	15594931	0.268899	5	0.0079365	0.015832	0.51964	0.25075	--	--	ANP32A	--	--	--
hypothalamus-VS-cerebellum	chr10	16256673	16256870	-0.173198	5	0.0079365	0.0039852	0.34889	0.52209	--	--	--	--	--	--
hypothalamus-VS-cerebellum	chr10	16536406	16536448	0.148484	5	0.0079365	0.00093225	0.25434	0.10586	--	--	--	--	--	--
hypothalamus-VS-cerebellum	chr10	20391110	20391169	0.246847	6	0.0021645	0.014482	0.47143	0.22458	--	INSYN1	INSYN1	--	--	--
hypothalamus-VS-cerebellum	chr10	20592379	20592471	0.259639	5	0.015873	0.0030917	0.43925	0.17961	--	--	NYNRIN	--	--	--
hypothalamus-VS-cerebellum	chr10	20592970	20593253	0.257455	7	0.0040793	0.014501	0.38124	0.12378	--	--	NYNRIN	--	--	--
hypothalamus-VS-cerebellum	chr10	20600475	20600640	0.180774	5	0.031746	0.010104	0.36828	0.1875	--	--	NYNRIN	--	--	--
hypothalamus-VS-cerebellum	chr10	20639150	20639584	0.230095	9	4.1135e-05	9.8467e-05	0.4139	0.18381	--	--	NFATC4	--	--	--
hypothalamus-VS-cerebellum	chr10	20833287	20833375	0.17718	5	0.015873	0.015175	0.35448	0.1773	--	--	RNF31	--	--	--
hypothalamus-VS-cerebellum	chr10	20902682	20902790	0.142719	5	0.031746	0.020872	0.40387	0.26115	CPNE6	--	--	--	--	CARMIL3
hypothalamus-VS-cerebellum	chr10	21109491	21109551	0.145182	5	0.0079365	0.00051947	0.3444	0.19922	--	--	--	--	--	--
hypothalamus-VS-cerebellum	chr10	21316419	21316581	-0.161218	5	0.031746	0.035147	0.090577	0.2518	--	--	--	--	--	--
hypothalamus-VS-cerebellum	chr10	21343561	21343720	0.243477	6	0.015152	0.019945	0.3997	0.15623	--	--	MYH7	--	--	--
hypothalamus-VS-cerebellum	chr10	21636553	21636692	0.121309	11	0.0052365	0.024406	0.34648	0.22517	--	--	--	--	--	--
hypothalamus-VS-cerebellum	chr10	36043311	36043393	0.244054	5	0.0079365	0.010321	0.40773	0.16367	--	--	--	PLCB2	--	--
hypothalamus-VS-cerebellum	chr10	36069114	36069382	0.139374	5	0.031746	0.038604	0.35484	0.21546	--	--	--	--	--	--
hypothalamus-VS-cerebellum	chr10	36073563	36073635	0.215388	5	0.0079365	0.012628	0.53797	0.32258	--	--	--	--	--	--
hypothalamus-VS-cerebellum	chr10	36552110	36552171	-0.212137	5	0.0079365	0.0039142	0.13258	0.34472	--	--	VPS18	--	--	--
hypothalamus-VS-cerebellum	chr10	37037102	37037176	0.125517	5	0.031746	0.03665	0.37696	0.25145	--	--	--	ITPKA	--	--
hypothalamus-VS-cerebellum	chr10	37037334	37037524	0.146429	8	0.004662	0.015119	0.34534	0.19891	--	--	--	ITPKA	--	--
hypothalamus-VS-cerebellum	chr10	37375419	37375831	0.366933	10	2.165e-05	0.015164	0.53944	0.1725	--	--	--	--	--	--
hypothalamus-VS-cerebellum	chr10	37381225	37381433	0.279212	7	0.011072	0.0017589	0.47446	0.19524	--	--	--	--	--	--
hypothalamus-VS-cerebellum	chr10	37397006	37397166	0.23935	7	0.00058275	0.00052556	0.42336	0.18401	--	--	--	--	--	--
hypothalamus-VS-cerebellum	chr10	53055470	53055543	0.257746	5	0.0079365	0.010668	0.498	0.24026	--	--	--	--	--	--
hypothalamus-VS-cerebellum	chr10	77220423	77220504	0.149036	5	0.0079365	0.010824	0.36966	0.22062	--	--	--	--	--	--
hypothalamus-VS-cerebellum	chr10	77225809	77225917	0.316277	7	0.00058275	0.0029385	0.53907	0.22279	--	--	--	--	--	--
hypothalamus-VS-cerebellum	chr10	77245783	77245850	0.267714	5	0.031746	0.021995	0.42	0.15228	--	--	--	--	--	--
hypothalamus-VS-cerebellum	chr10	79694066	79694293	0.20234	5	0.0079365	0.047291	0.36411	0.16177	--	--	TMEM229B	--	TMEM229B	--
hypothalamus-VS-cerebellum	chr10	81038534	81038633	0.229875	5	0.0079365	0.040631	0.36983	0.13996	--	--	ACTN1	--	--	--
hypothalamus-VS-cerebellum	chr10	82772211	82772534	0.132029	6	0.025974	0.0018115	0.33314	0.20111	--	--	--	MAP3K9	--	--
hypothalamus-VS-cerebellum	chr10	84563894	84563994	0.181442	5	0.015873	0.021942	0.50469	0.32324	--	--	--	--	--	--
hypothalamus-VS-cerebellum	chr10	84647576	84647650	0.176588	5	0.015873	0.046833	0.40088	0.22429	--	--	--	--	--	--
hypothalamus-VS-cerebellum	chr10	84668110	84668154	0.306347	5	0.0079365	0.00245	0.53391	0.22757	--	--	--	--	--	--
hypothalamus-VS-cerebellum	chr10	84800781	84800888	0.341915	5	0.0079365	0.019084	0.53613	0.19422	--	--	--	--	--	--
hypothalamus-VS-cerebellum	chr10	85104315	85104381	0.147972	5	0.0079365	0.015867	0.30354	0.15557	--	--	--	--	--	--
hypothalamus-VS-cerebellum	chr10	85127511	85127559	0.2844	5	0.0079365	0.0059831	0.46419	0.17979	--	--	NUMB	--	--	--
hypothalamus-VS-cerebellum	chr10	86197461	86197691	0.126556	5	0.015873	0.041755	0.32377	0.19722	--	--	--	LTBP2	--	--
hypothalamus-VS-cerebellum	chr10	86557432	86557563	0.198822	5	0.0079365	0.020989	0.3083	0.10948	--	--	RPS6KL1	--	--	--
hypothalamus-VS-cerebellum	chr10	86962515	86962569	0.203568	5	0.0079365	0.0046162	0.38451	0.18094	--	--	--	--	--	--
hypothalamus-VS-cerebellum	chr10	87042510	87042551	0.240558	5	0.0079365	0.013249	0.44188	0.20132	--	--	JDP2	--	--	--
hypothalamus-VS-cerebellum	chr10	87297718	87298105	0.188888	9	0.031469	0.033983	0.39681	0.20792	--	--	--	--	--	--
hypothalamus-VS-cerebellum	chr10	87517467	87517557	0.152739	5	0.0079365	0.0013922	0.34248	0.18975	--	--	--	--	--	--
hypothalamus-VS-cerebellum	chr10	87553243	87553315	0.451062	5	0.0079365	0.0055407	0.65072	0.19966	--	--	--	--	--	--
hypothalamus-VS-cerebellum	chr10	88369964	88370122	0.259216	7	0.00058275	0.042662	0.51819	0.25897	--	--	--	IFT43	--	--
hypothalamus-VS-cerebellum	chr10	88400611	88401055	0.217564	9	0.0018511	0.0064538	0.46195	0.24438	--	--	--	--	--	--
hypothalamus-VS-cerebellum	chr10	88942032	88942095	0.135497	5	0.0079365	0.0012026	0.35083	0.21534	--	--	--	--	--	--
hypothalamus-VS-cerebellum	chr10	89070059	89070388	0.260774	5	0.0079365	0.024687	0.33333	0.072558	--	--	--	--	--	--
hypothalamus-VS-cerebellum	chr10	89232232	89232293	0.215183	5	0.0079365	0.040603	0.44791	0.23273	--	--	--	--	--	--
hypothalamus-VS-cerebellum	chr10	89513796	89513853	0.301159	5	0.0079365	0.0060746	0.50568	0.20453	--	--	--	TMEM63C	--	--
hypothalamus-VS-cerebellum	chr10	89527670	89528194	0.156923	8	0.0006216	0.0056678	0.37585	0.21892	--	--	--	--	--	--
hypothalamus-VS-cerebellum	chr10	90069997	90070099	0.173905	5	0.015873	0.048903	0.27612	0.10221	--	--	--	ADCK1	--	--
hypothalamus-VS-cerebellum	chr10	90128072	90128387	0.197895	5	0.015873	0.011146	0.38374	0.18584	--	--	--	ADCK1	--	--
hypothalamus-VS-cerebellum	chr10	91789508	91789633	0.256305	6	0.0021645	0.00027652	0.5107	0.25439	--	--	--	NRXN3	--	--
hypothalamus-VS-cerebellum	chr10	101002155	101002237	0.217502	8	0.0001554	0.035857	0.33853	0.12103	--	--	--	--	--	--
hypothalamus-VS-cerebellum	chr10	101260862	101261218	0.150348	5	0.0079365	0.03421	0.3302	0.17985	--	--	--	--	--	--
hypothalamus-VS-cerebellum	chr10	101363205	101363373	0.196941	10	0.0068415	0.028007	0.44849	0.25155	--	--	--	ZC3H14	--	--
hypothalamus-VS-cerebellum	chr10	101925518	101925694	0.205697	8	0.010412	0.014605	0.35967	0.15398	--	--	--	FOXN3	--	--
hypothalamus-VS-cerebellum	chr10	101935594	101935773	0.271082	9	0.0018511	0.0022865	0.50471	0.23363	--	--	--	FOXN3	--	--
hypothalamus-VS-cerebellum	chr10	101952866	101952925	0.134713	8	0.0006216	0.0092188	0.33843	0.20371	--	--	--	FOXN3	--	--
hypothalamus-VS-cerebellum	chr10	101964144	101964362	0.27149	12	5.1772e-06	0.00019577	0.48917	0.21768	--	--	--	FOXN3	--	--
hypothalamus-VS-cerebellum	chr10	101981353	101981537	0.241258	7	0.002331	0.0061082	0.43871	0.19745	--	--	--	FOXN3	--	--
hypothalamus-VS-cerebellum	chr10	101992344	101992358	0.200024	5	0.0079365	0.0012243	0.32361	0.12358	--	--	--	FOXN3	--	--
hypothalamus-VS-cerebellum	chr10	101993150	101993249	0.292332	10	1.0825e-05	0.00038326	0.4965	0.20417	--	--	--	FOXN3	--	--
hypothalamus-VS-cerebellum	chr10	102007013	102007063	-0.17812	5	0.0079365	0.019263	0.14275	0.32087	--	--	--	FOXN3	--	--
hypothalamus-VS-cerebellum	chr10	102015308	102015533	0.251814	5	0.0079365	0.0029995	0.41435	0.16254	--	--	--	FOXN3	--	--
hypothalamus-VS-cerebellum	chr10	102182933	102182976	0.297538	5	0.015873	0.017037	0.55035	0.25281	--	FOXN3	--	FOXN3	--	--
hypothalamus-VS-cerebellum	chr10	102184409	102184470	0.306209	5	0.0079365	0.0024731	0.55357	0.24737	--	FOXN3	--	FOXN3	--	--
hypothalamus-VS-cerebellum	chr10	102190474	102190520	0.229939	5	0.015873	0.015024	0.42552	0.19558	--	FOXN3	--	FOXN3	--	--
hypothalamus-VS-cerebellum	chr10	102199865	102200248	0.256702	10	0.00032475	0.0003614	0.48525	0.22855	--	FOXN3	--	FOXN3	--	--
hypothalamus-VS-cerebellum	chr10	102229623	102229724	0.231444	5	0.0079365	0.0047579	0.44916	0.21772	--	FOXN3	--	FOXN3	--	--
hypothalamus-VS-cerebellum	chr10	102239706	102239738	0.443818	5	0.0079365	0.0011042	0.59882	0.15501	--	FOXN3	--	FOXN3	--	--
hypothalamus-VS-cerebellum	chr10	102245602	102245643	0.341896	5	0.0079365	0.00091505	0.55933	0.21743	--	FOXN3	--	FOXN3	--	--
hypothalamus-VS-cerebellum	chr10	102259691	102259824	0.266204	5	0.0079365	0.012953	0.42503	0.15883	--	FOXN3	--	FOXN3	--	--
hypothalamus-VS-cerebellum	chr10	102939011	102939316	0.236365	5	0.0079365	0.0058317	0.38737	0.15101	--	--	NRDE2	--	--	--
hypothalamus-VS-cerebellum	chr10	103144521	103144632	0.299537	9	0.0018511	0.0027372	0.52363	0.2241	--	--	--	--	--	--
hypothalamus-VS-cerebellum	chr10	103171506	103171916	0.338162	5	0.0079365	0.013177	0.62176	0.2836	--	--	--	--	--	--
hypothalamus-VS-cerebellum	chr10	103190878	103191454	0.188564	19	0.00022151	0.0020795	0.41743	0.22886	--	--	--	--	--	--
hypothalamus-VS-cerebellum	chr10	103216187	103216356	0.321972	5	0.0079365	0.027695	0.54243	0.22046	--	--	--	--	--	--
hypothalamus-VS-cerebellum	chr10	103242069	103242381	0.259608	5	0.0079365	0.0134	0.46538	0.20577	--	--	--	--	--	--
hypothalamus-VS-cerebellum	chr10	103249513	103250125	0.11608	7	0.037879	0.015609	0.26891	0.15283	--	--	--	--	--	--
hypothalamus-VS-cerebellum	chr10	103251964	103253243	0.159863	21	0.0015938	0.0026536	0.34932	0.18946	--	--	--	--	--	--
hypothalamus-VS-cerebellum	chr10	103262654	103262710	0.175555	7	0.0040793	0.014305	0.39348	0.21792	--	--	--	--	--	--
hypothalamus-VS-cerebellum	chr10	103373596	103373650	0.407749	5	0.0079365	0.0025159	0.74274	0.335	--	--	--	--	--	--
hypothalamus-VS-cerebellum	chr10	103417465	103417895	0.106478	13	0.00062804	0.0010324	0.32199	0.21551	--	--	--	--	--	--
hypothalamus-VS-cerebellum	chr10	103423762	103423904	0.309777	7	0.00058275	0.00075279	0.50789	0.19811	--	--	--	--	--	--
hypothalamus-VS-cerebellum	chr10	103425179	103425242	0.311646	5	0.0079365	0.00062856	0.57899	0.26735	--	--	--	--	--	--
hypothalamus-VS-cerebellum	chr10	103427063	103427168	0.157614	5	0.0079365	0.015083	0.47079	0.31318	--	--	--	--	--	--
hypothalamus-VS-cerebellum	chr10	103427765	103428012	0.311827	13	3.8459e-07	0.00045195	0.52339	0.21156	--	--	--	--	--	--
hypothalamus-VS-cerebellum	chr10	103429980	103430260	0.163601	12	0.0018298	0.020702	0.36983	0.20623	--	--	--	--	--	--
hypothalamus-VS-cerebellum	chr10	103615577	103615632	0.196548	5	0.0079365	0.022188	0.51509	0.31855	--	--	--	RPS6KA5	--	--
hypothalamus-VS-cerebellum	chr10	103687210	103687331	0.371968	9	4.1135e-05	3.5142e-05	0.57563	0.20366	--	--	--	RPS6KA5	--	--
hypothalamus-VS-cerebellum	chr11	1747958	1748168	0.343274	5	0.0079365	0.0026836	0.56734	0.22407	--	--	MALL	MALL	--	--
hypothalamus-VS-cerebellum	chr11	2394603	2394948	-0.120163	5	0.015873	0.035707	0.22871	0.34887	--	--	--	--	--	--
hypothalamus-VS-cerebellum	chr11	2535507	2535654	0.102704	8	0.014763	0.037427	0.33189	0.22919	--	--	--	ARID5A	--	--
hypothalamus-VS-cerebellum	chr11	2725094	2725534	0.198633	12	0.00037128	0.010533	0.37382	0.17519	--	--	--	CNNM4	--	--
hypothalamus-VS-cerebellum	chr11	2785431	2785560	0.193647	9	0.00078157	0.014281	0.42566	0.23201	--	--	SEMA4C	--	--	--
hypothalamus-VS-cerebellum	chr11	2789792	2789908	0.163298	9	0.018758	0.0058712	0.50209	0.33879	--	--	SEMA4C	--	--	--
hypothalamus-VS-cerebellum	chr11	2877348	2877392	0.106277	5	0.015873	0.035962	0.37042	0.26414	--	--	--	--	--	--
hypothalamus-VS-cerebellum	chr11	3085585	3085729	0.272029	5	0.0079365	0.0012577	0.52334	0.25131	--	--	--	--	--	--
hypothalamus-VS-cerebellum	chr11	3709856	3709943	0.308451	7	0.0011655	0.0053034	0.47793	0.16948	--	--	--	INPP4A	--	--
hypothalamus-VS-cerebellum	chr11	3711046	3711197	0.214421	11	0.0024467	0.011642	0.40355	0.18913	--	--	INPP4A	--	--	--
hypothalamus-VS-cerebellum	chr11	3720914	3721158	0.170855	15	0.00039057	0.0037558	0.35455	0.1837	--	--	INPP4A	--	--	--
hypothalamus-VS-cerebellum	chr11	3723538	3723655	0.151868	6	0.041126	0.036877	0.35326	0.20139	--	--	--	INPP4A	--	--
hypothalamus-VS-cerebellum	chr11	4511573	4511684	0.319246	5	0.0079365	0.00051222	0.57033	0.25108	--	--	--	--	--	--
hypothalamus-VS-cerebellum	chr11	4526476	4526696	0.253501	6	0.041126	0.015685	0.4706	0.2171	--	--	--	--	--	--
hypothalamus-VS-cerebellum	chr11	4632070	4632440	0.291424	7	0.00058275	0.00032504	0.50298	0.21156	--	--	--	--	--	--
hypothalamus-VS-cerebellum	chr11	4677238	4677563	0.169807	10	0.00048713	0.0073222	0.32887	0.15906	--	--	--	--	--	--
hypothalamus-VS-cerebellum	chr11	4713714	4713747	0.285032	5	0.0079365	0.01125	0.51999	0.23496	--	--	--	--	--	--
hypothalamus-VS-cerebellum	chr11	5483167	5483288	0.225958	7	0.00058275	0.0069033	0.47939	0.25343	--	CHST10	--	CHST10	--	--
hypothalamus-VS-cerebellum	chr11	5587885	5587952	0.10861	5	0.0079365	0.020476	0.23099	0.12238	--	--	--	--	--	--
hypothalamus-VS-cerebellum	chr11	6591341	6591442	0.152236	7	0.011072	0.037673	0.66255	0.51031	--	--	--	--	--	--
hypothalamus-VS-cerebellum	chr11	8894513	8894555	0.31026	5	0.0079365	0.0011363	0.5042	0.19394	--	--	--	--	--	--
hypothalamus-VS-cerebellum	chr11	9227124	9227384	0.150517	6	0.015152	0.014955	0.30248	0.15196	--	--	TGFBRAP1	--	--	--
hypothalamus-VS-cerebellum	chr11	9254293	9254398	0.241499	9	0.00016454	0.0012704	0.60498	0.36348	--	--	FHL2	--	--	--
hypothalamus-VS-cerebellum	chr11	10557762	10557984	0.251003	9	0.00078157	0.013906	0.45408	0.20308	--	--	--	--	--	--
hypothalamus-VS-cerebellum	chr11	11172736	11172827	0.138277	5	0.0079365	0.0012253	0.34843	0.21015	--	--	--	--	--	--
hypothalamus-VS-cerebellum	chr11	11350739	11351000	0.178243	7	0.026224	0.037777	0.39354	0.2153	--	--	--	RAB11FIP5	--	--
hypothalamus-VS-cerebellum	chr11	11478529	11478649	0.290548	7	0.00058275	0.00047947	0.45856	0.16801	--	--	--	SFXN5	--	--
hypothalamus-VS-cerebellum	chr11	12885002	12885070	0.352498	5	0.0079365	0.0040656	0.51238	0.15988	--	--	--	--	--	--
hypothalamus-VS-cerebellum	chr11	12964836	12965106	0.204314	6	0.004329	0.0022348	0.34513	0.14081	--	--	DYSF	DYSF	--	--
hypothalamus-VS-cerebellum	chr11	25588957	25589028	0.119622	5	0.015873	0.038756	0.33464	0.21501	ZFP36L2	--	--	--	--	--
hypothalamus-VS-cerebellum	chr11	28443684	28443745	0.180229	5	0.015873	0.016217	0.37876	0.19854	--	--	PRKCE	--	--	--
hypothalamus-VS-cerebellum	chr11	29366099	29366144	0.312248	5	0.0079365	0.020992	0.50517	0.19293	--	--	--	TTC7A	--	--
hypothalamus-VS-cerebellum	chr11	33348741	33349292	0.321251	18	4.8911e-07	1.3317e-06	0.50387	0.18262	--	--	NRXN1	--	--	--
hypothalamus-VS-cerebellum	chr11	37052551	37052969	0.174907	5	0.0079365	0.040838	0.51639	0.34148	--	SPTBN1	--	SPTBN1	--	--
hypothalamus-VS-cerebellum	chr11	37200391	37200952	0.223109	20	1.9207e-05	0.00052501	0.44016	0.21705	--	--	SPTBN1	--	--	--
hypothalamus-VS-cerebellum	chr11	37217123	37217187	0.334326	5	0.0079365	0.035625	0.55424	0.21992	--	--	--	SPTBN1	--	--
hypothalamus-VS-cerebellum	chr11	37221042	37221107	0.31397	5	0.0079365	0.025885	0.67803	0.36406	MIR2297	--	SPTBN1	--	--	--
hypothalamus-VS-cerebellum	chr11	44218482	44218527	0.22612	5	0.0079365	0.001291	0.46154	0.23542	--	--	--	--	--	--
hypothalamus-VS-cerebellum	chr11	44294622	44294689	0.200982	5	0.031746	0.037797	0.34255	0.14157	--	--	--	--	--	--
hypothalamus-VS-cerebellum	chr11	46807567	46807687	0.476523	5	0.0079365	0.0088681	0.54965	0.073123	--	--	--	--	--	--
hypothalamus-VS-cerebellum	chr11	49171076	49171101	0.384393	5	0.0079365	0.0017201	0.50473	0.12034	--	--	SFTPB	--	--	--
hypothalamus-VS-cerebellum	chr11	68640288	68640520	0.189571	8	0.014763	0.0058549	0.36198	0.17241	--	--	--	EHD3	--	--
hypothalamus-VS-cerebellum	chr11	68650280	68650341	0.367524	5	0.0079365	0.0036542	0.54494	0.17741	--	--	EHD3	--	--	--
hypothalamus-VS-cerebellum	chr11	73933169	73933317	0.323382	5	0.0079365	0.017303	0.58926	0.26588	--	--	DTNB	DTNB	DTNB	--
hypothalamus-VS-cerebellum	chr11	74046701	74047004	0.321812	11	2.8351e-06	0.00041421	0.40879	0.086975	--	--	DNMT3A	DNMT3A	--	--
hypothalamus-VS-cerebellum	chr11	74382555	74382609	0.218403	5	0.015873	0.035312	0.53417	0.31576	--	--	ADCY3	--	--	--
hypothalamus-VS-cerebellum	chr11	75362941	75363205	0.222424	5	0.0079365	0.027193	0.28314	0.060717	--	--	KLHL29	--	--	--
hypothalamus-VS-cerebellum	chr11	75586442	75586643	0.124698	5	0.0079365	0.0023805	0.3537	0.22901	--	KLHL29	--	KLHL29	--	--
hypothalamus-VS-cerebellum	chr11	78316760	78316834	0.189222	5	0.0079365	0.0023926	0.44163	0.25241	--	--	--	HS1BP3	--	--
hypothalamus-VS-cerebellum	chr11	87244650	87244695	-0.218002	5	0.0079365	0.0034946	0.15115	0.36915	--	HPCAL1	--	HPCAL1	--	--
hypothalamus-VS-cerebellum	chr11	87248321	87248401	0.17698	5	0.031746	0.01474	0.37839	0.20141	--	HPCAL1	--	HPCAL1	--	--
hypothalamus-VS-cerebellum	chr11	87432093	87432159	0.19808	5	0.015873	0.0043305	0.41048	0.2124	--	--	--	--	--	--
hypothalamus-VS-cerebellum	chr11	87528015	87528116	0.17399	9	0.0056355	0.0025602	0.36187	0.18788	--	--	KLF11	--	--	--
hypothalamus-VS-cerebellum	chr11	88020167	88020238	0.163042	7	0.0040793	0.0016591	0.39553	0.23249	--	--	--	--	--	--
hypothalamus-VS-cerebellum	chr11	88021256	88021385	0.35326	5	0.0079365	0.0061723	0.52887	0.17561	--	--	--	--	--	--
hypothalamus-VS-cerebellum	chr11	88713358	88713454	0.232227	7	0.0040793	0.0067028	0.48172	0.2495	--	--	--	--	--	--
hypothalamus-VS-cerebellum	chr11	92654550	92655089	-0.145953	7	0.00058275	0.00056168	0.11085	0.25681	--	--	DAB2IP	--	--	--
hypothalamus-VS-cerebellum	chr11	92883164	92883204	0.147059	5	0.0079365	0.006143	0.49887	0.35181	--	--	--	--	--	--
hypothalamus-VS-cerebellum	chr11	94509093	94509391	0.173737	17	0.00012281	0.0014698	0.3185	0.14477	--	--	--	--	--	--
hypothalamus-VS-cerebellum	chr11	94517174	94517349	0.1684	10	0.00105	0.00096112	0.37962	0.21122	--	--	--	--	--	--
hypothalamus-VS-cerebellum	chr11	94518958	94519258	-0.156962	5	0.015873	0.017693	0.051316	0.20828	--	--	--	--	--	--
hypothalamus-VS-cerebellum	chr11	94523914	94524161	0.186434	8	0.010412	0.0064701	0.37588	0.18944	--	--	--	--	--	--
hypothalamus-VS-cerebellum	chr11	94530084	94530295	0.137594	11	0.0014006	0.024208	0.3721	0.23451	--	--	DENND1A	--	--	--
hypothalamus-VS-cerebellum	chr11	95333359	95333444	0.219657	5	0.015873	0.043513	0.35785	0.13819	--	NEK6	--	NEK6	--	--
hypothalamus-VS-cerebellum	chr11	95344986	95345124	-0.114417	5	0.0079365	0.036632	0.13801	0.25243	--	NEK6	--	NEK6	--	--
hypothalamus-VS-cerebellum	chr11	95345841	95345909	0.225418	5	0.0079365	0.013402	0.48195	0.25653	--	NEK6	--	NEK6	--	--
hypothalamus-VS-cerebellum	chr11	95354815	95354944	0.131988	6	0.025974	0.016299	0.36317	0.23118	--	NEK6	--	NEK6	--	--
hypothalamus-VS-cerebellum	chr11	96278851	96278903	0.26859	5	0.031746	0.035953	0.51036	0.24177	--	--	MAPKAP1	--	MAPKAP1	--
hypothalamus-VS-cerebellum	chr11	97173865	97173931	0.221989	5	0.0079365	0.025626	0.51269	0.2907	--	--	--	--	--	--
hypothalamus-VS-cerebellum	chr11	97195906	97196132	0.374841	5	0.015873	0.014359	0.54499	0.17015	--	--	--	--	--	--
hypothalamus-VS-cerebellum	chr11	97220528	97220569	0.143463	6	0.0021645	0.015214	0.40549	0.26203	--	--	--	--	--	--
hypothalamus-VS-cerebellum	chr11	97304584	97304674	0.112923	5	0.0079365	0.0011954	0.31937	0.20645	--	--	--	--	--	--
hypothalamus-VS-cerebellum	chr11	97477772	97478463	0.176979	8	0.028127	0.039672	0.2342	0.057221	--	--	--	--	--	--
hypothalamus-VS-cerebellum	chr11	97652386	97652572	0.24422	7	0.00058275	0.0022267	0.45451	0.21029	--	--	--	--	--	--
hypothalamus-VS-cerebellum	chr11	97681789	97681864	0.292122	5	0.0079365	0.036133	0.54606	0.25394	--	RALGPS1	--	RALGPS1	--	--
hypothalamus-VS-cerebellum	chr11	97692859	97692924	0.158701	5	0.015873	0.0099957	0.37674	0.21804	--	RALGPS1	--	RALGPS1	--	--
hypothalamus-VS-cerebellum	chr11	97783783	97783938	0.20511	5	0.0079365	0.012754	0.45169	0.24658	--	--	--	RALGPS1	--	--
hypothalamus-VS-cerebellum	chr11	97824955	97825087	0.184925	6	0.004329	0.009845	0.46613	0.2812	--	--	--	RALGPS1	--	--
hypothalamus-VS-cerebellum	chr11	97887746	97887815	0.125048	7	0.017483	0.014206	0.44407	0.31902	--	--	--	RALGPS1	--	--
hypothalamus-VS-cerebellum	chr11	97934043	97934513	0.203958	5	0.0079365	0.0053628	0.38378	0.17982	--	--	--	RALGPS1	--	--
hypothalamus-VS-cerebellum	chr11	98232800	98233149	0.284934	7	0.0011655	0.0077498	0.48641	0.20148	--	--	--	--	--	--
hypothalamus-VS-cerebellum	chr11	98476768	98476811	0.250911	5	0.0079365	0.02156	0.50025	0.24934	--	--	CDK9	--	--	--
hypothalamus-VS-cerebellum	chr11	98624341	98624387	0.219522	5	0.015873	0.010016	0.49003	0.27051	--	--	FAM102A	--	--	--
hypothalamus-VS-cerebellum	chr11	98650612	98650648	0.195366	5	0.0079365	0.0026701	0.47056	0.27519	--	--	--	FAM102A	--	--
hypothalamus-VS-cerebellum	chr11	98873418	98873622	0.116592	5	0.031746	0.024932	0.25567	0.13908	--	--	DNM1	--	--	--
hypothalamus-VS-cerebellum	chr11	99021061	99021317	0.273232	7	0.0040793	0.037092	0.38622	0.11299	--	--	--	CERCAM	--	--
hypothalamus-VS-cerebellum	chr11	99066520	99066724	0.165042	10	0.0020892	0.0063426	0.31781	0.15277	--	--	ODF2	--	--	--
hypothalamus-VS-cerebellum	chr11	99138530	99138640	0.290425	5	0.0079365	0.0055559	0.43251	0.14209	--	--	--	SPTAN1	--	--
hypothalamus-VS-cerebellum	chr11	99149805	99149994	0.191377	10	0.00032475	0.0064753	0.35002	0.15864	--	--	SPTAN1	--	--	--
hypothalamus-VS-cerebellum	chr11	99163600	99163672	0.113985	7	0.037879	0.043966	0.27202	0.15804	--	--	SPTAN1	--	--	--
hypothalamus-VS-cerebellum	chr11	99420533	99420625	0.257265	5	0.0079365	0.045052	0.49231	0.23504	--	LRRC8A	--	LRRC8A	--	--
hypothalamus-VS-cerebellum	chr11	99429853	99430116	0.15089	8	0.006993	0.0025961	0.37126	0.22037	--	--	LRRC8A	--	--	--
hypothalamus-VS-cerebellum	chr11	99508038	99508131	0.440179	5	0.0079365	0.017905	0.82222	0.38204	--	--	SH3GLB2	--	--	NUP188
hypothalamus-VS-cerebellum	chr11	99551062	99551252	0.127113	5	0.0079365	0.00072856	0.25976	0.13265	--	--	MIGA2	--	--	--
hypothalamus-VS-cerebellum	chr11	99791431	99791568	0.208653	5	0.0079365	0.0050873	0.34581	0.13716	--	--	--	--	--	--
hypothalamus-VS-cerebellum	chr11	100054666	100054873	0.196908	7	0.0011655	0.004542	0.338	0.14109	--	--	ASB6	--	--	--
hypothalamus-VS-cerebellum	chr11	100220455	100220579	0.260118	5	0.0079365	0.039299	0.37221	0.1121	--	--	--	TOR1A	--	--
hypothalamus-VS-cerebellum	chr11	100264656	100264910	0.159365	10	0.0028795	0.014303	0.38692	0.22755	--	--	USP20	--	--	--
hypothalamus-VS-cerebellum	chr11	100273633	100273776	0.283705	8	0.0029526	0.035634	0.44639	0.16268	--	--	--	USP20	--	--
hypothalamus-VS-cerebellum	chr11	100281966	100282027	0.206015	6	0.0021645	0.0041113	0.40871	0.2027	--	--	--	--	--	USP20
hypothalamus-VS-cerebellum	chr11	100923720	100923848	0.17263	7	0.017483	0.04943	0.48287	0.31024	--	--	--	FUBP3	--	--
hypothalamus-VS-cerebellum	chr11	100929679	100929747	0.160075	5	0.0079365	0.01095	0.26141	0.10134	--	--	--	FUBP3	--	--
hypothalamus-VS-cerebellum	chr11	101149132	101149473	0.242148	17	5.0244e-06	3.8484e-05	0.5108	0.26865	--	--	ABL1	--	--	--
hypothalamus-VS-cerebellum	chr11	101292573	101292638	0.345948	5	0.0079365	0.0011439	0.56484	0.21889	--	--	--	--	--	--
hypothalamus-VS-cerebellum	chr11	101293425	101293480	0.279409	5	0.0079365	0.037719	0.5719	0.29249	--	--	--	--	--	--
hypothalamus-VS-cerebellum	chr11	101425241	101425273	0.128845	5	0.0079365	0.048957	0.44489	0.31605	--	--	--	NUP214	--	--
hypothalamus-VS-cerebellum	chr11	101517127	101517548	0.20376	7	0.006993	0.041265	0.42316	0.2194	--	--	PLPP7	--	PLPP7	--
hypothalamus-VS-cerebellum	chr11	101626148	101626654	0.176054	29	7.7449e-08	4.0603e-06	0.39449	0.21844	--	--	--	--	--	--
hypothalamus-VS-cerebellum	chr11	101626732	101627156	-0.218603	5	0.0079365	0.015451	0.084981	0.30358	--	--	--	--	--	--
hypothalamus-VS-cerebellum	chr11	101627211	101627294	0.19364	9	0.0012341	0.031933	0.43965	0.24601	--	--	--	--	--	--
hypothalamus-VS-cerebellum	chr11	101637553	101637615	0.244266	5	0.0079365	0.0034462	0.40602	0.16175	--	--	--	--	--	--
hypothalamus-VS-cerebellum	chr11	101644384	101644599	0.222841	12	0.0001028	7.4833e-05	0.40066	0.17782	--	--	--	--	--	--
hypothalamus-VS-cerebellum	chr11	101664979	101665384	0.297852	8	0.010412	0.0027756	0.40483	0.10698	--	--	--	POMT1	--	UCK1
hypothalamus-VS-cerebellum	chr11	101665395	101665557	0.196092	5	0.031746	0.018107	0.4334	0.23731	--	--	POMT1	--	--	UCK1
hypothalamus-VS-cerebellum	chr11	101728221	101728273	0.173348	5	0.031746	0.034424	0.28212	0.10878	--	--	RAPGEF1	--	RAPGEF1	--
hypothalamus-VS-cerebellum	chr11	101728277	101728379	0.21015	6	0.041126	0.040855	0.3035	0.093351	--	--	RAPGEF1	--	RAPGEF1	--
hypothalamus-VS-cerebellum	chr11	101733772	101733871	0.152208	5	0.0079365	0.0048726	0.41287	0.26066	--	--	--	RAPGEF1	--	--
hypothalamus-VS-cerebellum	chr11	101738751	101738797	0.285009	6	0.0021645	0.0042969	0.52095	0.23594	--	--	--	RAPGEF1	--	--
hypothalamus-VS-cerebellum	chr11	101740933	101741126	0.321273	7	0.00058275	0.014842	0.49137	0.1701	--	--	--	RAPGEF1	--	--
hypothalamus-VS-cerebellum	chr11	101744366	101744850	0.208304	9	0.00049362	0.016873	0.3334	0.12509	--	--	RAPGEF1	RAPGEF1	--	--
hypothalamus-VS-cerebellum	chr11	101749650	101749712	0.321624	5	0.0079365	0.0030456	0.53455	0.21292	--	--	--	RAPGEF1	--	--
hypothalamus-VS-cerebellum	chr11	101759176	101759296	0.23818	7	0.006993	0.0060377	0.44942	0.21124	--	--	--	RAPGEF1	--	--
hypothalamus-VS-cerebellum	chr11	101759720	101759988	0.174108	6	0.041126	0.039814	0.4378	0.26369	--	--	--	RAPGEF1	--	--
hypothalamus-VS-cerebellum	chr11	101766128	101766161	0.252534	5	0.015873	0.023052	0.52961	0.27707	--	--	RAPGEF1	--	--	--
hypothalamus-VS-cerebellum	chr11	101767416	101767435	0.122484	5	0.031746	0.034802	0.33257	0.21009	--	--	--	RAPGEF1	--	--
hypothalamus-VS-cerebellum	chr11	101806158	101806304	0.219261	5	0.015873	0.010033	0.50469	0.28543	--	--	--	RAPGEF1	--	--
hypothalamus-VS-cerebellum	chr11	101839619	101839711	0.211999	5	0.0079365	0.017204	0.86889	0.65689	RAPGEF1	--	--	--	--	--
hypothalamus-VS-cerebellum	chr11	101860507	101860738	-0.10243	9	0.018758	0.016366	0.18661	0.28904	--	--	--	--	--	--
hypothalamus-VS-cerebellum	chr11	101970987	101971170	0.214646	5	0.0079365	0.0044975	0.46471	0.25007	--	--	--	--	--	--
hypothalamus-VS-cerebellum	chr11	101979994	101980154	0.415917	9	4.1135e-05	0.0029696	0.51984	0.10393	--	--	--	MED27	--	--
hypothalamus-VS-cerebellum	chr11	102047435	102047718	0.169989	5	0.0079365	0.0411	0.37042	0.20044	--	--	--	MED27	--	--
hypothalamus-VS-cerebellum	chr11	102178279	102178375	0.352729	5	0.0079365	0.00088426	0.50214	0.14941	--	--	--	MED27	--	--
hypothalamus-VS-cerebellum	chr11	102309913	102310080	0.24636	9	0.00049362	0.0030045	0.5246	0.27824	--	--	--	NTNG2	--	--
hypothalamus-VS-cerebellum	chr11	102313492	102313673	0.173653	8	0.010412	0.035117	0.47727	0.30361	--	--	--	NTNG2	--	--
hypothalamus-VS-cerebellum	chr11	102625005	102625310	0.157612	5	0.0079365	0.019685	0.35401	0.1964	--	--	--	--	--	--
hypothalamus-VS-cerebellum	chr11	102693197	102693509	0.118258	14	0.00047938	0.0043667	0.25292	0.13466	--	--	--	--	--	BARHL1
hypothalamus-VS-cerebellum	chr11	102723770	102723884	0.213007	6	0.0021645	0.0041475	0.41565	0.20264	--	--	DDX31	--	--	--
hypothalamus-VS-cerebellum	chr11	102751129	102751184	0.174603	5	0.0079365	0.01234	0.33891	0.16431	--	--	DDX31	--	--	--
hypothalamus-VS-cerebellum	chr11	102853948	102854166	0.168641	5	0.0079365	0.0042978	0.33643	0.16779	--	--	--	AK8	--	--
hypothalamus-VS-cerebellum	chr11	102976050	102976093	0.357172	5	0.0079365	0.010166	0.64353	0.28636	--	--	--	--	--	--
hypothalamus-VS-cerebellum	chr11	103051326	103051525	0.297632	6	0.0021645	0.0014136	0.543	0.24537	--	--	GFI1B	--	--	--
hypothalamus-VS-cerebellum	chr11	103087703	103087792	0.169061	5	0.0079365	0.011676	0.33138	0.16232	--	--	--	GTF3C5	--	--
hypothalamus-VS-cerebellum	chr11	103221750	103221818	0.174508	5	0.015873	0.016977	0.38827	0.21376	--	--	--	--	--	--
hypothalamus-VS-cerebellum	chr11	103274010	103274210	0.216301	10	0.00032475	0.028469	0.47018	0.25388	--	--	--	--	--	--
hypothalamus-VS-cerebellum	chr11	103285526	103285582	0.116134	5	0.0079365	0.0030906	0.27639	0.16025	--	--	--	--	--	--
hypothalamus-VS-cerebellum	chr11	103349808	103349926	0.270355	6	0.0021645	0.006499	0.58062	0.31027	--	--	--	--	--	--
hypothalamus-VS-cerebellum	chr11	103397285	103397595	0.251214	9	4.1135e-05	0.0064322	0.40375	0.15254	--	--	--	--	--	--
hypothalamus-VS-cerebellum	chr11	103419352	103419422	0.198478	5	0.015873	0.023876	0.49443	0.29595	--	--	--	--	--	--
hypothalamus-VS-cerebellum	chr11	103433019	103433249	0.181161	8	0.0003108	0.002667	0.31691	0.13575	--	--	--	--	--	--
hypothalamus-VS-cerebellum	chr11	103434304	103434457	0.249254	6	0.008658	0.0039858	0.48628	0.23702	--	--	--	--	--	--
hypothalamus-VS-cerebellum	chr11	103446314	103446350	0.283673	5	0.0079365	0.010531	0.59792	0.31425	--	--	--	--	--	CAMSAP1
hypothalamus-VS-cerebellum	chr11	103453303	103453441	0.166815	7	0.0040793	0.036977	0.37247	0.20566	--	--	--	CAMSAP1	--	--
hypothalamus-VS-cerebellum	chr11	103455252	103455657	0.181253	15	0.0011298	0.023105	0.45361	0.27236	--	--	CAMSAP1	--	--	--
hypothalamus-VS-cerebellum	chr11	103463911	103464096	0.530591	5	0.031746	0.049916	0.68542	0.15483	--	--	--	CAMSAP1	--	--
hypothalamus-VS-cerebellum	chr11	103468789	103468861	0.325932	5	0.0079365	0.0034911	0.50521	0.17928	--	--	--	CAMSAP1	--	--
hypothalamus-VS-cerebellum	chr11	103468889	103469003	0.548728	6	0.0021645	0.0017508	0.83923	0.29051	--	--	--	CAMSAP1	--	--
hypothalamus-VS-cerebellum	chr11	103471991	103472141	0.208916	7	0.0040793	0.0050183	0.49717	0.28825	--	--	--	CAMSAP1	--	--
hypothalamus-VS-cerebellum	chr11	103498392	103498527	0.111267	5	0.031746	0.03452	0.24932	0.13806	--	--	--	--	--	--
hypothalamus-VS-cerebellum	chr11	103508500	103509250	0.164458	14	0.00011357	8.4286e-05	0.28345	0.11899	--	--	--	--	--	--
hypothalamus-VS-cerebellum	chr11	103524843	103525484	0.160014	19	0.001022	0.011075	0.40045	0.24044	--	--	UBAC1	UBAC1	--	--
hypothalamus-VS-cerebellum	chr11	103529502	103529719	0.208713	8	0.006993	0.0166	0.35204	0.14333	--	--	--	UBAC1	--	--
hypothalamus-VS-cerebellum	chr11	103605770	103605878	0.219754	5	0.0079365	0.037546	0.42137	0.20162	--	--	--	NACC2	--	--
hypothalamus-VS-cerebellum	chr11	103640822	103640926	0.216049	5	0.015873	0.014056	0.4801	0.26405	--	--	--	--	--	--
hypothalamus-VS-cerebellum	chr11	103658775	103658837	0.156366	5	0.0079365	0.00059798	0.36994	0.21357	--	--	--	--	--	--
hypothalamus-VS-cerebellum	chr11	103664338	103664438	0.259565	5	0.0079365	0.017151	0.56884	0.30927	--	--	--	--	--	--
hypothalamus-VS-cerebellum	chr11	103670264	103670355	0.215963	7	0.0011655	0.00047199	0.43894	0.22298	--	--	--	--	--	--
hypothalamus-VS-cerebellum	chr11	103684529	103684620	0.217495	5	0.031746	0.034492	0.31489	0.097393	--	--	--	--	--	--
hypothalamus-VS-cerebellum	chr11	103746950	103747032	0.237228	5	0.0079365	0.01374	0.40844	0.17121	--	--	--	--	--	--
hypothalamus-VS-cerebellum	chr11	103749885	103750185	0.296452	5	0.0079365	0.0048416	0.5731	0.27664	--	--	--	--	--	--
hypothalamus-VS-cerebellum	chr11	103750857	103751433	0.274194	7	0.00058275	0.0021925	0.37605	0.10186	--	--	--	--	--	--
hypothalamus-VS-cerebellum	chr11	103762310	103762371	0.252109	6	0.041126	0.013812	0.48467	0.23256	--	--	--	--	--	--
hypothalamus-VS-cerebellum	chr11	103819426	103819673	0.142103	7	0.00058275	0.0089047	0.35944	0.21734	--	--	--	--	--	--
hypothalamus-VS-cerebellum	chr11	103823992	103824388	0.189632	5	0.0079365	0.012824	0.36525	0.17561	--	--	--	--	--	--
hypothalamus-VS-cerebellum	chr11	103846063	103846421	0.149023	7	0.026224	0.040597	0.46386	0.31484	--	--	--	--	--	--
hypothalamus-VS-cerebellum	chr11	103850039	103850948	0.192688	24	1.7205e-06	0.0009402	0.41693	0.22424	--	--	--	--	--	--
hypothalamus-VS-cerebellum	chr11	103852698	103852853	0.254465	9	0.0056355	0.015729	0.62142	0.36696	--	--	--	--	--	--
hypothalamus-VS-cerebellum	chr11	103855066	103855249	0.190482	5	0.031746	0.044961	0.53868	0.3482	--	--	--	--	--	--
hypothalamus-VS-cerebellum	chr11	103857119	103857338	0.172098	6	0.025974	0.013878	0.38834	0.21624	--	--	--	--	--	--
hypothalamus-VS-cerebellum	chr11	103858580	103858789	0.266447	9	0.00078157	0.015483	0.43872	0.17227	--	--	--	--	--	--
hypothalamus-VS-cerebellum	chr11	103866440	103866582	0.345775	8	0.0001554	0.00078104	0.63958	0.29381	--	--	--	--	--	--
hypothalamus-VS-cerebellum	chr11	103868703	103869027	0.270558	14	2.3663e-05	0.00044149	0.4539	0.18334	--	--	--	--	--	--
hypothalamus-VS-cerebellum	chr11	103870613	103870745	0.253262	5	0.0079365	0.037247	0.51143	0.25817	--	--	--	--	--	--
hypothalamus-VS-cerebellum	chr11	103878088	103878420	0.235047	8	0.0010878	0.00069983	0.44676	0.21171	--	--	CARD9	CARD9	--	--
hypothalamus-VS-cerebellum	chr11	103880023	103880130	0.24058	5	0.0079365	0.013281	0.41204	0.17146	--	--	CARD9	--	--	--
hypothalamus-VS-cerebellum	chr11	103885386	103885693	0.212432	12	0.0055596	0.020596	0.42943	0.21699	--	--	--	--	--	--
hypothalamus-VS-cerebellum	chr11	103901624	103901714	0.151434	8	0.0003108	0.0025433	0.2796	0.12816	--	--	--	--	--	--
hypothalamus-VS-cerebellum	chr11	103920986	103921457	0.125051	13	0.00062804	0.017685	0.28859	0.16354	--	--	PMPCA	PMPCA	--	--
hypothalamus-VS-cerebellum	chr11	103925493	103925590	0.22822	5	0.015873	0.013827	0.46631	0.23809	--	--	PMPCA	--	--	--
hypothalamus-VS-cerebellum	chr11	103928841	103929244	0.136746	10	0.0038862	0.028866	0.29173	0.15499	--	--	INPP5E	INPP5E	--	--
hypothalamus-VS-cerebellum	chr11	103931510	103932006	0.247498	12	7.396e-07	2.646e-05	0.43016	0.18267	--	--	--	INPP5E	--	--
hypothalamus-VS-cerebellum	chr11	103935186	103935851	0.216339	16	1.0356e-05	0.00018936	0.36651	0.15017	--	--	INPP5E	--	--	--
hypothalamus-VS-cerebellum	chr11	103936384	103936519	0.154654	5	0.0079365	0.014371	0.36568	0.21102	INPP5E	--	--	--	--	--
hypothalamus-VS-cerebellum	chr11	103958841	103959266	0.224705	15	5.5763e-06	0.00042856	0.37686	0.15216	--	--	--	--	--	--
hypothalamus-VS-cerebellum	chr11	103980053	103980190	0.159098	5	0.0079365	0.00053741	0.38482	0.22572	--	--	--	--	--	--
hypothalamus-VS-cerebellum	chr11	103999310	103999389	-0.144993	6	0.004329	0.0014663	0.16252	0.30752	--	--	--	--	--	--
hypothalamus-VS-cerebellum	chr11	104043006	104043078	0.159563	5	0.015873	0.046056	0.40796	0.2484	--	--	--	--	--	--
hypothalamus-VS-cerebellum	chr11	104080443	104080657	0.127378	6	0.015152	0.038364	0.40116	0.27378	--	--	--	--	--	--
hypothalamus-VS-cerebellum	chr11	104096673	104096767	0.228403	5	0.031746	0.034685	0.48264	0.25424	--	--	--	--	--	--
hypothalamus-VS-cerebellum	chr11	104142566	104142653	0.112299	5	0.015873	0.017326	0.37197	0.25967	--	--	--	AGPAT2	--	--
hypothalamus-VS-cerebellum	chr11	104176738	104176964	0.250311	10	0.0001299	0.0024814	0.41618	0.16586	--	--	--	--	--	--
hypothalamus-VS-cerebellum	chr11	104180499	104180800	0.295548	5	0.0079365	0.029408	0.47828	0.18273	--	--	--	--	--	--
hypothalamus-VS-cerebellum	chr11	104180803	104180934	0.229786	7	0.002331	0.0060148	0.56968	0.3399	--	--	--	--	--	--
hypothalamus-VS-cerebellum	chr11	104205818	104205907	0.225657	5	0.0079365	0.047871	0.3666	0.14094	--	--	--	--	--	--
hypothalamus-VS-cerebellum	chr11	104327412	104327552	0.210955	9	0.0056355	0.0064146	0.36969	0.15874	--	--	--	SURF4	--	--
hypothalamus-VS-cerebellum	chr11	104357171	104357318	0.255541	6	0.004329	0.0015053	0.4696	0.21406	--	--	--	--	--	--
hypothalamus-VS-cerebellum	chr11	104362305	104362417	0.112885	5	0.015873	0.043765	0.29083	0.17794	--	--	--	--	--	--
hypothalamus-VS-cerebellum	chr11	104416352	104416677	0.142058	8	0.0006216	0.00075455	0.35637	0.21431	--	--	CACFD1	--	CACFD1	SLC2A6
hypothalamus-VS-cerebellum	chr11	104417913	104418011	0.239559	8	0.006993	0.01574	0.45911	0.21955	--	--	SLC2A6	--	SLC2A6	CACFD1
hypothalamus-VS-cerebellum	chr11	104418191	104418279	0.269097	5	0.0079365	0.0041187	0.45195	0.18286	--	--	SLC2A6	--	--	CACFD1
hypothalamus-VS-cerebellum	chr11	104420766	104420819	0.122615	6	0.004329	0.030845	0.27354	0.15092	--	--	SLC2A6	--	--	--
hypothalamus-VS-cerebellum	chr11	104451808	104451985	0.153755	8	0.0001554	0.0023125	0.32773	0.17398	--	--	--	--	--	--
hypothalamus-VS-cerebellum	chr11	104456235	104456532	0.272575	5	0.0079365	0.0048403	0.46029	0.18771	--	--	MYMK	--	MYMK	--
hypothalamus-VS-cerebellum	chr11	104495769	104495828	0.172532	5	0.015873	0.037641	0.33413	0.1616	--	--	ADAMTSL2	--	--	--
hypothalamus-VS-cerebellum	chr11	104582030	104582459	0.113501	7	0.00058275	0.0057208	0.25604	0.14253	--	--	SARDH	--	--	--
hypothalamus-VS-cerebellum	chr11	104613209	104613450	0.264653	7	0.00058275	0.0017136	0.4155	0.15084	--	--	--	SARDH	--	--
hypothalamus-VS-cerebellum	chr11	104636847	104636948	0.306142	5	0.0079365	0.012838	0.48677	0.18063	--	SARDH	SARDH	--	--	--
hypothalamus-VS-cerebellum	chr11	104651170	104651458	0.181099	5	0.0079365	0.019068	0.32083	0.13973	--	--	--	--	--	--
hypothalamus-VS-cerebellum	chr11	104659506	104659917	0.21029	6	0.004329	0.015094	0.29716	0.086867	--	--	--	--	--	--
hypothalamus-VS-cerebellum	chr11	104680007	104680089	0.28904	5	0.0079365	0.00097822	0.46842	0.17938	--	--	--	--	--	--
hypothalamus-VS-cerebellum	chr11	104683094	104683241	0.264207	5	0.0079365	0.00074327	0.42301	0.1588	--	--	--	--	--	--
hypothalamus-VS-cerebellum	chr11	104683255	104683586	0.377906	5	0.0079365	0.0025139	0.46956	0.091651	--	--	--	--	--	--
hypothalamus-VS-cerebellum	chr11	104686369	104686713	0.292671	5	0.0079365	0.0036335	0.54266	0.24999	--	--	--	--	--	--
hypothalamus-VS-cerebellum	chr11	104688791	104689092	0.177403	10	0.0038862	0.0057566	0.41616	0.23876	--	--	--	--	--	--
hypothalamus-VS-cerebellum	chr11	104693673	104693755	0.161126	5	0.0079365	0.00088176	0.33172	0.1706	--	--	--	--	--	--
hypothalamus-VS-cerebellum	chr11	104705941	104706312	0.181499	5	0.0079365	0.0058578	0.40633	0.22483	--	--	--	--	--	--
hypothalamus-VS-cerebellum	chr11	104716166	104716768	0.217424	9	0.00028795	0.0061758	0.37649	0.15907	--	--	--	--	--	--
hypothalamus-VS-cerebellum	chr11	104739192	104739306	0.110873	8	0.028127	0.037988	0.40184	0.29097	--	--	--	--	--	--
hypothalamus-VS-cerebellum	chr11	104771820	104771896	0.285156	5	0.0079365	0.0010997	0.51327	0.22811	--	--	--	--	--	--
hypothalamus-VS-cerebellum	chr11	104777864	104778095	0.250054	5	0.0079365	0.006644	0.45838	0.20832	--	--	--	--	--	--
hypothalamus-VS-cerebellum	chr11	104780556	104780679	0.206454	8	0.004662	0.014348	0.44833	0.24187	--	--	--	--	--	--
hypothalamus-VS-cerebellum	chr11	104781523	104781581	0.1586	5	0.0079365	0.00050982	0.2918	0.1332	--	--	--	--	--	--
hypothalamus-VS-cerebellum	chr11	104781616	104781784	0.230066	9	0.00049362	0.0058387	0.40905	0.17898	--	--	--	--	--	--
hypothalamus-VS-cerebellum	chr11	104782402	104782512	0.240293	7	0.011072	0.040753	0.51489	0.2746	--	--	--	--	--	--
hypothalamus-VS-cerebellum	chr11	104789080	104789148	0.151773	5	0.015873	0.038084	0.49868	0.34691	--	--	--	--	--	--
hypothalamus-VS-cerebellum	chr11	104801486	104801790	0.22567	15	2.5534e-05	0.00090568	0.42311	0.19744	--	--	--	--	--	--
hypothalamus-VS-cerebellum	chr11	104806601	104807202	0.230314	7	0.006993	0.044568	0.49006	0.25975	--	--	--	--	--	--
hypothalamus-VS-cerebellum	chr11	104818119	104818397	0.206781	5	0.0079365	0.0015293	0.48641	0.27963	--	--	--	--	--	--
hypothalamus-VS-cerebellum	chr11	104824512	104824613	0.304972	6	0.0021645	0.00064014	0.54454	0.23957	--	--	--	--	--	--
hypothalamus-VS-cerebellum	chr11	104831449	104831585	0.22043	14	2.3663e-05	0.00020279	0.45416	0.23373	--	--	--	--	--	--
hypothalamus-VS-cerebellum	chr11	104855251	104855310	0.15772	5	0.0079365	0.013128	0.40511	0.24739	--	--	--	--	--	--
hypothalamus-VS-cerebellum	chr11	104860740	104860899	0.180506	10	1.0825e-05	0.00035714	0.32157	0.14106	--	--	BRD3	--	--	--
hypothalamus-VS-cerebellum	chr11	104868656	104868713	-0.24186	5	0.0079365	0.0041401	0.25469	0.49655	--	--	BRD3	--	--	--
hypothalamus-VS-cerebellum	chr11	104873472	104873551	0.325719	5	0.015873	0.016476	0.68	0.35428	--	--	--	BRD3	--	--
hypothalamus-VS-cerebellum	chr11	104874947	104875037	0.17676	5	0.031746	0.012996	0.36616	0.1894	--	--	--	BRD3	--	--
hypothalamus-VS-cerebellum	chr11	104877503	104877807	0.103697	10	0.018543	0.027399	0.31316	0.20946	--	--	--	BRD3	--	--
hypothalamus-VS-cerebellum	chr11	104880186	104880488	0.253855	5	0.0079365	0.04556	0.50352	0.24966	BRD3	--	--	--	--	--
hypothalamus-VS-cerebellum	chr11	104881924	104882636	0.121401	20	0.00087736	0.015272	0.34332	0.22192	--	--	--	--	--	--
hypothalamus-VS-cerebellum	chr11	104937347	104937435	0.444304	5	0.0079365	0.025563	0.64681	0.2025	--	--	--	WDR5	--	--
hypothalamus-VS-cerebellum	chr11	104937605	104937857	0.149437	5	0.015873	0.010287	0.32911	0.17967	--	--	--	WDR5	--	--
hypothalamus-VS-cerebellum	chr11	105309481	105309626	0.226697	5	0.031746	0.013846	0.40202	0.17533	--	--	--	CACNA1B	--	--
hypothalamus-VS-cerebellum	chr11	105320399	105320475	0.21912	8	0.0006216	0.0092341	0.30108	0.081958	--	--	--	CACNA1B	--	--
hypothalamus-VS-cerebellum	chr11	105374522	105374594	0.273692	5	0.0079365	0.011623	0.42957	0.15587	--	--	--	CACNA1B	--	--
hypothalamus-VS-cerebellum	chr11	105381600	105381696	0.245128	6	0.004329	0.0045509	0.42229	0.17716	--	--	--	CACNA1B	--	--
hypothalamus-VS-cerebellum	chr11	105432824	105432892	0.323904	6	0.0021645	0.0039111	0.53947	0.21557	--	--	--	EHMT1	--	--
hypothalamus-VS-cerebellum	chr11	105434220	105434439	0.229961	8	0.0018648	0.0026572	0.46287	0.23291	--	--	--	EHMT1	--	--
hypothalamus-VS-cerebellum	chr11	105452540	105452928	0.216304	6	0.008658	0.016657	0.40008	0.18377	--	--	--	EHMT1	--	--
hypothalamus-VS-cerebellum	chr11	105453670	105453730	0.125425	5	0.0079365	0.0062352	0.37579	0.25036	--	--	--	EHMT1	--	--
hypothalamus-VS-cerebellum	chr11	105460289	105460438	0.20931	5	0.015873	0.03575	0.2889	0.079587	--	--	--	EHMT1	--	--
hypothalamus-VS-cerebellum	chr11	105469832	105470176	0.173366	7	0.002331	0.016899	0.41772	0.24436	--	--	--	EHMT1	--	--
hypothalamus-VS-cerebellum	chr11	105473731	105473962	0.269614	5	0.0079365	0.0049922	0.4929	0.22329	--	--	--	EHMT1	--	--
hypothalamus-VS-cerebellum	chr11	105476994	105477135	0.126999	6	0.025974	0.0013624	0.36977	0.24277	--	--	--	EHMT1	--	--
hypothalamus-VS-cerebellum	chr11	105488453	105488601	0.197725	7	0.017483	0.014412	0.44151	0.24378	--	--	--	EHMT1	--	--
hypothalamus-VS-cerebellum	chr11	105492697	105492944	0.211135	10	0.0089307	0.032959	0.58079	0.36966	--	--	--	EHMT1	--	--
hypothalamus-VS-cerebellum	chr11	105492983	105493117	0.240606	7	0.006993	0.0023244	0.53998	0.29937	--	--	--	EHMT1	--	--
hypothalamus-VS-cerebellum	chr11	105500698	105500816	0.242363	5	0.0079365	0.024299	0.49314	0.25078	--	--	--	--	--	--
hypothalamus-VS-cerebellum	chr11	105505822	105505981	0.125362	11	0.023308	0.026396	0.43361	0.30824	--	--	--	--	--	--
hypothalamus-VS-cerebellum	chr11	105506632	105506768	0.215426	8	0.004662	0.03968	0.45523	0.2398	--	--	--	--	--	--
hypothalamus-VS-cerebellum	chr11	105524206	105524422	0.12472	11	0.0041025	0.047272	0.38342	0.2587	--	--	--	--	--	--
hypothalamus-VS-cerebellum	chr11	105571564	105571745	0.209199	5	0.0079365	0.025593	0.51422	0.30502	--	--	--	--	--	--
hypothalamus-VS-cerebellum	chr11	105578191	105578237	0.179892	5	0.0079365	0.00079458	0.31267	0.13278	--	--	--	--	--	--
hypothalamus-VS-cerebellum	chr11	105667712	105667900	0.254328	6	0.0021645	0.014812	0.39947	0.14514	--	--	--	--	--	--
hypothalamus-VS-cerebellum	chr11	105671684	105671914	0.237855	6	0.008658	0.01275	0.40679	0.16893	--	--	--	--	--	--
hypothalamus-VS-cerebellum	chr11	105675203	105675699	0.103045	13	0.010169	0.018043	0.28734	0.18429	--	--	--	--	--	--
hypothalamus-VS-cerebellum	chr11	105679180	105679358	0.187942	7	0.026224	0.037048	0.53323	0.34529	--	--	--	--	--	--
hypothalamus-VS-cerebellum	chr11	105682247	105682538	0.126936	7	0.017483	0.043897	0.41836	0.29142	--	--	--	--	--	--
hypothalamus-VS-cerebellum	chr11	105732735	105733011	0.10875	5	0.015873	0.010045	0.28677	0.17802	--	--	--	--	--	--
hypothalamus-VS-cerebellum	chr11	105754367	105754625	0.151806	9	0.031469	0.032582	0.38085	0.22904	--	--	--	--	--	--
hypothalamus-VS-cerebellum	chr11	105757953	105758135	0.261061	8	0.0003108	0.00088962	0.49261	0.23154	--	--	--	--	--	--
hypothalamus-VS-cerebellum	chr11	105771327	105771488	0.102225	6	0.004329	0.012939	0.27293	0.17071	--	--	--	--	--	--
hypothalamus-VS-cerebellum	chr11	105845860	105845981	0.186269	5	0.0079365	0.014738	0.35334	0.16707	--	--	--	--	--	--
hypothalamus-VS-cerebellum	chr11	105853010	105853084	0.130003	5	0.015873	0.01367	0.34008	0.21008	--	--	--	--	--	--
hypothalamus-VS-cerebellum	chr11	105868349	105868732	0.172739	8	0.0003108	0.0020889	0.3666	0.19386	--	--	--	--	--	--
hypothalamus-VS-cerebellum	chr11	105875064	105875154	0.161327	8	0.004662	0.038419	0.43219	0.27086	--	--	CYSRT1	--	--	--
hypothalamus-VS-cerebellum	chr11	105881412	105881687	0.217195	14	9.401e-05	0.0020379	0.48192	0.26473	--	--	--	--	--	--
hypothalamus-VS-cerebellum	chr11	105884452	105885199	0.132679	22	0.00061028	0.0038051	0.36842	0.23574	--	--	NDOR1	NDOR1	--	--
hypothalamus-VS-cerebellum	chr11	105922240	105922298	0.248385	5	0.0079365	0.044664	0.53522	0.28684	--	--	--	--	--	--
hypothalamus-VS-cerebellum	chr11	105922729	105922842	0.283845	5	0.0079365	0.0075939	0.57301	0.28916	--	--	--	--	--	--
hypothalamus-VS-cerebellum	chr11	105922966	105923026	0.157085	5	0.015873	0.01521	0.32802	0.17094	--	--	--	--	--	--
hypothalamus-VS-cerebellum	chr11	105925432	105925555	0.32626	8	0.0001554	0.00020663	0.53458	0.20832	--	--	--	--	--	--
hypothalamus-VS-cerebellum	chr11	105937538	105938217	0.149158	20	1.5046e-05	0.00014058	0.3695	0.22034	--	--	--	--	--	--
hypothalamus-VS-cerebellum	chr11	105951048	105951345	0.116806	15	0.0039425	0.0037114	0.33704	0.22023	--	--	--	--	--	--
hypothalamus-VS-cerebellum	chr11	105954740	105955061	0.366005	7	0.002331	0.020841	0.52531	0.15931	--	--	--	--	--	--
hypothalamus-VS-cerebellum	chr11	105957522	105957657	0.27401	8	0.0003108	0.0011657	0.525	0.25099	--	--	--	--	--	--
hypothalamus-VS-cerebellum	chr11	105978912	105978992	0.334147	5	0.0079365	0.03622	0.56614	0.23199	--	--	--	--	--	--
hypothalamus-VS-cerebellum	chr11	105981852	105982069	0.182525	9	0.0056355	0.0086272	0.44657	0.26405	--	--	--	--	--	--
hypothalamus-VS-cerebellum	chr11	105983704	105983826	-0.167195	5	0.0079365	0.0024061	0.12168	0.28888	--	--	--	--	--	--
hypothalamus-VS-cerebellum	chr11	105996431	105996849	0.218858	5	0.0079365	0.013735	0.42536	0.2065	--	--	RXRA	RXRA	--	--
hypothalamus-VS-cerebellum	chr11	106003321	106003380	0.219041	5	0.0079365	0.01379	0.48336	0.26432	--	--	--	RXRA	--	--
hypothalamus-VS-cerebellum	chr11	106004144	106004241	0.155421	5	0.0079365	0.021316	0.33991	0.18449	--	--	--	RXRA	--	--
hypothalamus-VS-cerebellum	chr11	106017290	106018021	0.13046	15	0.0051139	0.012779	0.39413	0.26367	--	--	RXRA	--	RXRA	--
hypothalamus-VS-cerebellum	chr11	106035551	106035608	0.126076	7	0.006993	0.036626	0.34734	0.22126	--	--	--	--	--	--
hypothalamus-VS-cerebellum	chr11	106037382	106037457	0.147862	5	0.0079365	0.0071354	0.28778	0.13991	--	--	--	--	--	--
hypothalamus-VS-cerebellum	chr11	106040048	106040303	0.455612	5	0.0079365	0.020108	0.52156	0.065947	--	--	--	--	--	--
hypothalamus-VS-cerebellum	chr11	106040695	106041050	0.242873	12	0.00014422	0.00047866	0.43846	0.19558	--	--	--	--	--	--
hypothalamus-VS-cerebellum	chr11	106080016	106080152	0.293925	5	0.0079365	0.010272	0.51047	0.21655	--	--	--	--	--	--
hypothalamus-VS-cerebellum	chr11	106115418	106115557	0.157907	7	0.006993	0.043722	0.34381	0.1859	--	--	--	--	--	--
hypothalamus-VS-cerebellum	chr11	106126648	106126698	0.166995	6	0.004329	0.040749	0.33992	0.17293	--	--	--	--	--	--
hypothalamus-VS-cerebellum	chr11	106156802	106157259	0.266764	10	2.165e-05	0.00095608	0.4437	0.17693	--	--	--	--	--	--
hypothalamus-VS-cerebellum	chr11	106158469	106158515	0.107637	5	0.0079365	0.0028787	0.31343	0.20579	--	--	--	--	--	--
hypothalamus-VS-cerebellum	chr11	106188331	106188502	0.206499	7	0.0011655	0.0381	0.47152	0.26502	--	--	ENTPD2	ENTPD2	--	--
hypothalamus-VS-cerebellum	chr11	106199972	106200190	0.2416	7	0.00058275	0.00053539	0.47466	0.23306	FUT7	--	--	--	--	--
hypothalamus-VS-cerebellum	chr11	106200639	106201139	0.198107	18	5.1274e-05	8.0131e-05	0.40937	0.21127	FUT7	--	--	--	--	--
hypothalamus-VS-cerebellum	chr11	106201952	106202444	0.115025	21	0.00033747	0.0046151	0.27779	0.16277	--	--	FUT7	--	--	--
hypothalamus-VS-cerebellum	chr11	106202645	106202670	0.308593	5	0.0079365	0.0049312	0.4784	0.16981	--	--	FUT7	--	--	--
hypothalamus-VS-cerebellum	chr11	106210565	106210662	0.285702	5	0.0079365	0.0038329	0.48809	0.20239	--	--	--	--	--	--
hypothalamus-VS-cerebellum	chr11	106211808	106211915	-0.228788	5	0.0079365	0.0028184	0.064029	0.29282	--	--	--	--	--	--
hypothalamus-VS-cerebellum	chr11	106218793	106218836	0.280139	5	0.0079365	0.014157	0.63429	0.35415	--	--	--	--	--	--
hypothalamus-VS-cerebellum	chr11	106219779	106219909	0.367541	5	0.0079365	0.0066109	0.68037	0.31283	--	--	--	--	--	--
hypothalamus-VS-cerebellum	chr11	106222503	106222793	0.249656	8	0.0001554	0.014818	0.51089	0.26123	--	--	--	--	--	--
hypothalamus-VS-cerebellum	chr11	106223521	106223615	0.206785	5	0.0079365	0.013653	0.49752	0.29074	--	--	--	--	--	--
hypothalamus-VS-cerebellum	chr11	106231317	106232147	0.153154	14	0.0115	0.0079965	0.47684	0.32369	--	--	CLIC3,PAXX	PAXX	CLIC3,PAXX	--
hypothalamus-VS-cerebellum	chr11	106272610	106272702	0.124721	5	0.015873	0.011143	0.41114	0.28642	--	--	--	--	--	--
hypothalamus-VS-cerebellum	chr11	106284376	106284452	0.250348	5	0.0079365	0.0031537	0.44943	0.19908	--	--	--	--	--	C8G
hypothalamus-VS-cerebellum	chr11	106288207	106288509	-0.133229	5	0.015873	0.034783	0.10938	0.24261	C8G	--	FBXW5	--	--	--
hypothalamus-VS-cerebellum	chr11	106288872	106288915	0.156028	5	0.0079365	0.021267	0.31244	0.15642	--	--	--	FBXW5	--	--
hypothalamus-VS-cerebellum	chr11	106289836	106289946	0.202688	5	0.0079365	0.034752	0.3842	0.18151	--	--	FBXW5	--	--	--
hypothalamus-VS-cerebellum	chr11	106294741	106294867	0.178125	5	0.015873	0.018399	0.41805	0.23992	--	--	--	--	--	--
hypothalamus-VS-cerebellum	chr11	106295806	106295944	0.12192	5	0.0079365	0.0058348	0.2686	0.14667	--	--	--	--	--	--
hypothalamus-VS-cerebellum	chr11	106296291	106296659	0.244448	13	1.3461e-06	0.00047523	0.41591	0.17146	--	--	--	--	--	--
hypothalamus-VS-cerebellum	chr11	106296723	106297024	0.27309	10	7.5776e-05	0.0062402	0.40956	0.13647	--	--	--	--	--	--
hypothalamus-VS-cerebellum	chr11	106298321	106298589	0.312691	11	5.6703e-06	5.9054e-05	0.49352	0.18083	--	--	--	--	--	--
hypothalamus-VS-cerebellum	chr11	106299834	106299948	0.237992	5	0.031746	0.01807	0.49125	0.25326	--	--	--	--	--	--
hypothalamus-VS-cerebellum	chr11	106301447	106301476	0.183882	5	0.0079365	0.038024	0.3953	0.21141	--	--	--	--	--	--
hypothalamus-VS-cerebellum	chr11	106306051	106306128	0.268032	6	0.0021645	0.0040135	0.48539	0.21736	--	--	--	--	--	--
hypothalamus-VS-cerebellum	chr11	106322548	106322636	0.156305	7	0.00058275	0.00064126	0.35266	0.19635	--	--	EDF1	--	--	--
hypothalamus-VS-cerebellum	chr11	106322726	106322801	0.275941	5	0.0079365	0.037729	0.49385	0.21791	--	--	--	EDF1	--	--
hypothalamus-VS-cerebellum	chr11	106323895	106324059	0.175897	15	0.00084085	0.012932	0.38766	0.21177	--	--	EDF1	--	EDF1	MAMDC4
hypothalamus-VS-cerebellum	chr11	106326781	106326841	0.231347	6	0.0021645	0.0016556	0.37878	0.14743	--	--	--	MAMDC4	--	--
hypothalamus-VS-cerebellum	chr11	106327229	106327476	0.236465	6	0.0021645	0.0003506	0.46727	0.2308	--	--	MAMDC4	MAMDC4	--	--
hypothalamus-VS-cerebellum	chr11	106327953	106328429	0.187134	13	0.0042151	0.035324	0.45498	0.26785	--	--	MAMDC4	MAMDC4	--	--
hypothalamus-VS-cerebellum	chr11	106328926	106329002	0.2348	6	0.0021645	0.0040879	0.37315	0.13835	--	--	--	MAMDC4	--	--
hypothalamus-VS-cerebellum	chr11	106330833	106330975	0.174402	6	0.015152	0.045973	0.31344	0.13903	--	--	MAMDC4	--	--	--
hypothalamus-VS-cerebellum	chr11	106339921	106339945	0.295907	5	0.0079365	0.020638	0.48541	0.1895	--	--	--	--	--	--
hypothalamus-VS-cerebellum	chr11	106340266	106340295	0.171265	5	0.015873	0.038978	0.40285	0.23158	--	--	--	--	--	--
hypothalamus-VS-cerebellum	chr11	106344927	106345256	0.254804	19	1.5667e-06	3.603e-05	0.43541	0.18061	--	--	RABL6	RABL6	--	--
hypothalamus-VS-cerebellum	chr11	106347765	106348374	0.207611	10	0.01469	0.012905	0.41187	0.20426	--	--	RABL6	--	--	--
hypothalamus-VS-cerebellum	chr11	106351998	106352073	0.134919	7	0.011072	0.038806	0.45613	0.32121	--	--	--	RABL6	--	--
hypothalamus-VS-cerebellum	chr11	106354562	106355203	0.210668	9	0.00078157	0.014558	0.34119	0.13053	--	--	RABL6	RABL6	--	--
hypothalamus-VS-cerebellum	chr11	106367213	106367254	0.210611	5	0.0079365	0.010148	0.41348	0.20287	--	--	CCDC183	--	--	--
hypothalamus-VS-cerebellum	chr11	106392623	106392737	0.169945	5	0.0079365	0.010248	0.41188	0.24194	--	--	--	--	--	--
hypothalamus-VS-cerebellum	chr11	106405748	106405919	0.117414	10	0.011496	0.0064496	0.32904	0.21163	--	--	--	--	--	--
hypothalamus-VS-cerebellum	chr11	106438258	106438461	0.220971	6	0.008658	0.040023	0.36226	0.14129	--	--	--	--	--	--
hypothalamus-VS-cerebellum	chr11	106444139	106444526	0.120788	8	0.006993	0.0072608	0.30121	0.18042	--	--	--	--	--	--
hypothalamus-VS-cerebellum	chr11	106445813	106445925	0.292215	7	0.00058275	0.014142	0.47772	0.18551	--	--	--	--	--	MRPS2
hypothalamus-VS-cerebellum	chr11	106447930	106448719	0.199609	12	2.2188e-05	0.00017549	0.38129	0.18168	--	--	MRPS2	--	--	--
hypothalamus-VS-cerebellum	chr11	106459643	106459764	0.180713	7	0.017483	0.018025	0.47198	0.29127	--	--	--	--	--	--
hypothalamus-VS-cerebellum	chr11	106462211	106462921	0.150258	18	0.0002743	0.004375	0.2682	0.11794	--	--	--	--	--	--
hypothalamus-VS-cerebellum	chr11	106464371	106464859	0.253326	16	8.8679e-05	0.00018675	0.41465	0.16132	--	--	--	--	--	--
hypothalamus-VS-cerebellum	chr11	106465217	106465329	0.207377	6	0.0021645	0.0059471	0.37202	0.16464	--	--	--	--	--	--
hypothalamus-VS-cerebellum	chr11	106497928	106498307	0.280808	13	1.8653e-05	7.7685e-05	0.43988	0.15907	--	--	--	--	--	--
hypothalamus-VS-cerebellum	chr11	106534606	106534941	0.312146	5	0.031746	0.035466	0.36117	0.049027	--	--	--	--	--	--
hypothalamus-VS-cerebellum	chr11	106537136	106537187	0.219307	5	0.0079365	0.01786	0.50617	0.28686	--	--	--	--	--	--
hypothalamus-VS-cerebellum	chr11	106539894	106540076	0.285209	8	0.0001554	0.00075577	0.46328	0.17807	--	--	--	--	--	--
hypothalamus-VS-cerebellum	chr11	106543270	106543506	0.328142	7	0.00058275	0.00034147	0.47668	0.14854	--	--	--	--	--	--
hypothalamus-VS-cerebellum	chr11	106577768	106578298	0.192019	12	0.00014422	0.005064	0.41361	0.22159	--	--	--	--	--	--
hypothalamus-VS-cerebellum	chr11	106579352	106579594	0.148607	5	0.015873	0.015658	0.43321	0.2846	--	--	--	--	--	--
hypothalamus-VS-cerebellum	chr11	106579742	106580292	0.347409	5	0.0079365	0.011712	0.57423	0.22682	--	--	--	--	--	--
hypothalamus-VS-cerebellum	chr11	106597608	106597699	0.257981	7	0.002331	0.0044877	0.49258	0.2346	--	--	--	--	--	--
hypothalamus-VS-cerebellum	chr11	106610833	106610882	0.252872	6	0.015152	0.0039586	0.46685	0.21398	--	--	--	--	--	--
hypothalamus-VS-cerebellum	chr11	106634839	106635157	0.264219	6	0.0021645	0.005859	0.42832	0.1641	--	--	--	--	--	--
hypothalamus-VS-cerebellum	chr11	106636243	106636606	0.254153	5	0.0079365	0.00055566	0.30238	0.048228	--	--	--	--	--	--
hypothalamus-VS-cerebellum	chr11	106650347	106650493	0.237706	6	0.008658	0.039274	0.45508	0.21737	--	--	--	--	--	--
hypothalamus-VS-cerebellum	chr11	106652152	106652723	0.166974	19	0.0044204	0.046895	0.44295	0.27597	--	--	--	--	--	--
hypothalamus-VS-cerebellum	chr11	106655019	106655085	0.179235	5	0.0079365	0.0415	0.31289	0.13366	--	--	--	--	--	--
hypothalamus-VS-cerebellum	chr11	106676322	106676416	0.35222	5	0.0079365	0.0038827	0.55403	0.20181	--	--	--	--	--	--
hypothalamus-VS-cerebellum	chr11	106679094	106679425	0.288149	5	0.0079365	0.00099369	0.43809	0.14994	--	--	--	--	--	--
hypothalamus-VS-cerebellum	chr11	106682875	106683022	0.120406	5	0.0079365	0.013604	0.36137	0.24097	--	--	--	--	--	--
hypothalamus-VS-cerebellum	chr11	106746071	106746254	0.251538	8	0.004662	0.0056667	0.46479	0.21325	--	--	--	--	--	--
hypothalamus-VS-cerebellum	chr11	106810335	106810460	0.232149	7	0.0011655	0.018879	0.42237	0.19022	--	--	--	--	--	--
hypothalamus-VS-cerebellum	chr11	106812830	106812914	0.296581	5	0.0079365	0.013019	0.35796	0.061376	--	--	--	--	--	--
hypothalamus-VS-cerebellum	chr11	106840929	106840970	0.147977	5	0.0079365	0.036461	0.33039	0.18241	--	--	--	--	--	--
hypothalamus-VS-cerebellum	chr11	106867026	106867369	0.164779	5	0.0079365	0.034432	0.34923	0.18446	--	--	--	--	--	--
hypothalamus-VS-cerebellum	chr11	106874824	106875046	0.210061	13	5.2305e-05	0.0022069	0.33382	0.12376	--	--	--	--	--	--
hypothalamus-VS-cerebellum	chr11	106884941	106885043	0.163325	5	0.0079365	0.002432	0.31244	0.14912	--	--	--	--	--	--
hypothalamus-VS-cerebellum	chr11	106887584	106887838	0.227135	5	0.0079365	0.0041011	0.37032	0.14319	--	--	--	--	--	--
hypothalamus-VS-cerebellum	chr11	106891636	106892113	0.136159	5	0.031746	0.040854	0.19605	0.059894	--	--	--	--	--	--
hypothalamus-VS-cerebellum	chr11	106910918	106911165	0.199498	7	0.0011655	0.041677	0.37028	0.17078	--	--	--	--	--	--
hypothalamus-VS-cerebellum	chr11	106929271	106929453	0.120811	5	0.0079365	0.043259	0.27821	0.15739	--	--	--	--	--	--
hypothalamus-VS-cerebellum	chr11	106930326	106930374	0.196482	5	0.015873	0.0059541	0.41331	0.21683	--	--	--	--	--	--
hypothalamus-VS-cerebellum	chr11	106932031	106932186	0.192139	8	0.0029526	0.015103	0.3529	0.16076	--	--	--	--	--	--
hypothalamus-VS-cerebellum	chr11	106935373	106935409	0.251184	6	0.0021645	0.0010788	0.50472	0.25354	--	--	--	--	--	--
hypothalamus-VS-cerebellum	chr11	106940174	106940750	0.128114	13	1.3461e-06	0.00018792	0.22868	0.10057	--	--	--	--	--	--
hypothalamus-VS-cerebellum	chr11	106982357	106982880	0.201308	14	0.00016475	0.00099203	0.4278	0.22649	--	--	--	--	--	--
hypothalamus-VS-cerebellum	chr11	106983271	106983744	0.30781	7	0.00058275	0.00020043	0.49441	0.1866	--	--	--	--	--	--
hypothalamus-VS-cerebellum	chr11	106994535	106994625	0.183686	6	0.025974	0.012962	0.44134	0.25766	--	--	--	--	--	--
hypothalamus-VS-cerebellum	chr11	107020231	107020338	0.180729	5	0.0079365	0.0023887	0.35907	0.17834	--	--	--	--	--	--
hypothalamus-VS-cerebellum	chr11	107036500	107036565	0.239917	5	0.0079365	0.011309	0.39842	0.1585	--	--	--	--	--	--
hypothalamus-VS-cerebellum	chr11	107075392	107075523	0.112122	5	0.031746	0.021549	0.2509	0.13877	--	--	--	--	--	--
hypothalamus-VS-cerebellum	chr11	107077399	107077661	0.124014	5	0.0079365	0.0024805	0.3307	0.20669	--	--	--	--	--	--
hypothalamus-VS-cerebellum	chr11	107153647	107153714	0.205189	5	0.0079365	0.015191	0.4687	0.26351	--	--	--	ODF3	--	BET1L
hypothalamus-VS-cerebellum	chr11	107208992	107209081	0.251023	5	0.031746	0.031182	0.55197	0.30095	--	--	--	--	--	--
hypothalamus-VS-cerebellum	chr11	107261368	107261407	0.116945	5	0.0079365	0.036723	0.33428	0.21733	--	--	--	--	--	--
hypothalamus-VS-cerebellum	chr11	107275137	107275186	0.170233	5	0.015873	0.012563	0.40817	0.23794	--	--	--	--	--	--
hypothalamus-VS-cerebellum	chr12	11653547	11653616	0.167911	6	0.025974	0.013237	0.49279	0.32488	--	--	--	--	--	--
hypothalamus-VS-cerebellum	chr12	13563089	13563450	0.290455	7	0.0011655	0.0074939	0.42576	0.1353	--	--	--	--	--	--
hypothalamus-VS-cerebellum	chr12	14676972	14677154	0.207525	6	0.015152	0.015235	0.44875	0.24123	--	--	--	SERP2	--	--
hypothalamus-VS-cerebellum	chr12	16635821	16635936	0.344446	5	0.0079365	0.017743	0.61181	0.26736	--	--	--	--	--	--
hypothalamus-VS-cerebellum	chr12	20870477	20870549	0.231963	5	0.0079365	0.00075059	0.4016	0.16964	--	--	--	SERPINE3	--	--
hypothalamus-VS-cerebellum	chr12	23269050	23269210	0.109419	7	0.026224	0.014786	0.32794	0.21852	--	--	--	--	--	--
hypothalamus-VS-cerebellum	chr12	28309967	28310053	0.214209	5	0.015873	0.036628	0.34476	0.13055	--	--	--	--	--	--
hypothalamus-VS-cerebellum	chr12	30157749	30157895	0.275944	5	0.0079365	0.019699	0.42533	0.14939	--	--	--	ALOX5AP	--	--
hypothalamus-VS-cerebellum	chr12	30907292	30907336	0.202876	5	0.0079365	0.017951	0.4328	0.22993	--	--	--	--	--	--
hypothalamus-VS-cerebellum	chr12	30977967	30978043	0.134783	5	0.015873	0.021297	0.34765	0.21287	--	--	--	--	--	--
hypothalamus-VS-cerebellum	chr12	30978126	30978246	0.316932	5	0.0079365	0.014897	0.54985	0.23291	--	--	--	--	--	--
hypothalamus-VS-cerebellum	chr12	31029801	31029925	0.210133	7	0.002331	0.0058264	0.38422	0.17409	--	--	--	--	--	--
hypothalamus-VS-cerebellum	chr12	34068750	34068822	0.39346	6	0.0021645	0.0039137	0.53931	0.14585	--	--	--	ATP8A2	--	--
hypothalamus-VS-cerebellum	chr12	34604018	34604077	0.28513	5	0.0079365	0.003691	0.49907	0.21394	--	--	--	--	--	--
hypothalamus-VS-cerebellum	chr12	35349324	35349539	0.132688	6	0.0021645	0.0049392	0.29085	0.15817	--	--	--	--	--	--
hypothalamus-VS-cerebellum	chr12	35393020	35393220	0.233638	5	0.015873	0.047005	0.4405	0.20686	--	--	--	--	--	--
hypothalamus-VS-cerebellum	chr12	36076703	36076997	0.208195	22	2.3818e-06	7.1756e-06	0.3967	0.1885	--	--	--	--	--	EEF1AKMT1
hypothalamus-VS-cerebellum	chr12	36241732	36241808	0.333339	5	0.0079365	0.0040638	0.54592	0.21258	--	--	--	CRYL1	--	--
hypothalamus-VS-cerebellum	chr12	52541825	52542108	0.150301	5	0.031746	0.04737	0.23577	0.085464	--	--	MYCBP2	--	--	--
hypothalamus-VS-cerebellum	chr12	79132330	79132506	0.379289	6	0.041126	0.0072598	0.68063	0.30134	--	--	--	--	--	--
hypothalamus-VS-cerebellum	chr12	79374790	79374898	-0.110726	6	0.008658	0.038855	0.15263	0.26336	--	--	--	FARP1	--	--
hypothalamus-VS-cerebellum	chr12	79440262	79440499	0.152719	11	0.0018599	0.011714	0.38032	0.22761	--	--	STK24	--	--	--
hypothalamus-VS-cerebellum	chr12	79469997	79470110	-0.139705	5	0.0079365	0.01668	0.094837	0.23454	--	--	--	STK24	--	--
hypothalamus-VS-cerebellum	chr12	79742183	79742216	0.189782	5	0.0079365	0.012918	0.49995	0.31017	--	--	--	DOCK9	--	--
hypothalamus-VS-cerebellum	chr12	79840682	79840725	0.196254	5	0.0079365	0.00098416	0.4443	0.24805	--	--	--	DOCK9	--	--
hypothalamus-VS-cerebellum	chr12	80152520	80152638	0.209943	5	0.0079365	0.0032175	0.44522	0.23528	--	GPR183	--	UBAC2,GPR183	--	--
hypothalamus-VS-cerebellum	chr12	81114153	81114319	0.228845	8	0.0029526	0.0058936	0.44551	0.21667	--	--	--	PCCA	--	--
hypothalamus-VS-cerebellum	chr12	81149645	81149781	0.282316	8	0.0001554	0.00034328	0.40352	0.1212	--	--	--	PCCA	--	--
hypothalamus-VS-cerebellum	chr12	81157688	81157744	0.148739	7	0.026224	0.041124	0.40411	0.25537	--	--	GGACT	--	--	--
hypothalamus-VS-cerebellum	chr12	82677109	82677229	0.450567	5	0.0079365	0.0043569	0.65354	0.20298	--	--	--	FGF14	--	--
hypothalamus-VS-cerebellum	chr12	87833010	87833183	0.104692	6	0.008658	0.015464	0.34341	0.23872	--	--	--	--	--	--
hypothalamus-VS-cerebellum	chr12	88263943	88264078	0.198785	5	0.0079365	0.0011566	0.40309	0.20431	--	--	--	--	--	--
hypothalamus-VS-cerebellum	chr12	88278481	88278596	0.232645	7	0.006993	0.042839	0.47912	0.24648	--	--	--	--	--	--
hypothalamus-VS-cerebellum	chr12	88383329	88383416	0.177607	5	0.031746	0.01788	0.43287	0.25527	--	--	--	--	--	--
hypothalamus-VS-cerebellum	chr12	88520298	88520388	0.122338	5	0.0079365	0.041013	0.34645	0.22411	--	--	--	--	--	--
hypothalamus-VS-cerebellum	chr12	88634434	88634692	0.142134	12	0.0055596	0.038589	0.37583	0.23369	--	--	--	--	--	--
hypothalamus-VS-cerebellum	chr12	88649577	88649620	0.160557	5	0.0079365	0.0040268	0.31824	0.15769	--	--	--	--	--	--
hypothalamus-VS-cerebellum	chr12	88650974	88651146	0.150781	11	0.003181	0.047569	0.39905	0.24827	--	--	--	--	--	--
hypothalamus-VS-cerebellum	chr12	88664557	88664903	0.161824	7	0.011072	0.040091	0.39644	0.23462	--	--	--	--	--	--
hypothalamus-VS-cerebellum	chr12	88665553	88666069	0.137155	20	0.00065366	0.0091304	0.36833	0.23118	--	--	--	--	--	--
hypothalamus-VS-cerebellum	chr12	89093269	89093356	0.240327	7	0.00058275	0.00020289	0.38618	0.14586	--	--	--	--	--	--
hypothalamus-VS-cerebellum	chr12	89163172	89163266	0.136371	5	0.031746	0.035669	0.37103	0.23466	--	--	--	--	--	--
hypothalamus-VS-cerebellum	chr12	89185654	89185809	0.210216	5	0.0079365	0.011011	0.35627	0.14605	--	--	--	RAB20	--	--
hypothalamus-VS-cerebellum	chr12	89254126	89254262	0.191503	7	0.00058275	0.0017112	0.35095	0.15944	--	--	CARS2	--	--	--
hypothalamus-VS-cerebellum	chr12	89286846	89286915	0.177106	5	0.015873	0.034823	0.43107	0.25396	--	--	--	--	--	--
hypothalamus-VS-cerebellum	chr12	89293233	89293469	0.196511	5	0.0079365	0.036569	0.22739	0.030878	--	--	--	--	--	--
hypothalamus-VS-cerebellum	chr12	89482523	89482574	0.233439	6	0.0021645	0.00039766	0.42917	0.19573	--	--	--	ARHGEF7	--	--
hypothalamus-VS-cerebellum	chr12	89485639	89485718	0.23876	5	0.0079365	0.024667	0.44403	0.20527	--	--	--	ARHGEF7	--	--
hypothalamus-VS-cerebellum	chr12	89486216	89486308	0.243491	9	0.0027561	0.0023958	0.4314	0.18791	--	--	--	ARHGEF7	--	--
hypothalamus-VS-cerebellum	chr12	89495012	89495158	0.154429	7	0.002331	0.0071123	0.34355	0.18912	--	--	ARHGEF7	--	--	--
hypothalamus-VS-cerebellum	chr12	89495580	89495780	0.247414	9	4.1135e-05	0.0008397	0.4217	0.17429	--	--	--	ARHGEF7	--	--
hypothalamus-VS-cerebellum	chr12	89496171	89496244	0.167436	5	0.0079365	0.011232	0.39992	0.23248	--	--	--	ARHGEF7	--	--
hypothalamus-VS-cerebellum	chr12	89501541	89501678	0.281346	5	0.0079365	0.0055256	0.45019	0.16884	--	--	--	ARHGEF7	--	--
hypothalamus-VS-cerebellum	chr12	89533226	89533405	0.146081	10	0.0028795	0.028224	0.42393	0.27784	--	--	--	ARHGEF7	--	--
hypothalamus-VS-cerebellum	chr12	89548027	89548522	0.18017	10	0.018543	0.0025774	0.40367	0.2235	--	--	--	--	--	--
hypothalamus-VS-cerebellum	chr12	89548850	89548919	0.210212	5	0.0079365	0.0035452	0.47363	0.26342	--	--	--	--	--	--
hypothalamus-VS-cerebellum	chr12	89553485	89553617	0.21395	10	1.0825e-05	0.0001263	0.44745	0.2335	--	--	--	--	--	--
hypothalamus-VS-cerebellum	chr12	89560424	89560565	0.277128	8	0.0001554	0.00069118	0.46937	0.19224	--	--	--	TEX29	--	--
hypothalamus-VS-cerebellum	chr12	89637321	89637355	0.181269	5	0.0079365	0.045898	0.34807	0.1668	--	--	--	--	--	--
hypothalamus-VS-cerebellum	chr12	90197771	90197906	0.115569	7	0.011072	0.017917	0.32554	0.20997	--	--	--	--	--	SPACA7
hypothalamus-VS-cerebellum	chr12	90222919	90223431	0.112773	14	0.0076996	0.015089	0.33079	0.21802	--	--	TUBGCP3	--	--	--
hypothalamus-VS-cerebellum	chr12	90224328	90224406	0.187297	5	0.0079365	0.01543	0.30443	0.11714	--	--	--	TUBGCP3	--	--
hypothalamus-VS-cerebellum	chr12	90272356	90272660	0.194855	5	0.0079365	0.0428	0.36614	0.17128	--	--	--	--	--	--
hypothalamus-VS-cerebellum	chr12	90306752	90306855	0.26128	10	1.0825e-05	0.00038061	0.46452	0.20324	--	--	--	--	--	--
hypothalamus-VS-cerebellum	chr12	90312979	90313066	0.308814	6	0.0021645	0.0053229	0.52328	0.21447	--	--	--	--	--	--
hypothalamus-VS-cerebellum	chr12	90320110	90320272	0.224837	9	0.0039901	0.037216	0.3681	0.14326	--	--	--	--	--	--
hypothalamus-VS-cerebellum	chr12	90326045	90326153	0.220708	5	0.031746	0.039058	0.59077	0.37006	--	--	--	--	--	--
hypothalamus-VS-cerebellum	chr12	90329057	90329156	0.24044	7	0.00058275	0.0025409	0.46287	0.22243	--	--	--	--	--	--
hypothalamus-VS-cerebellum	chr12	90329586	90329721	0.147838	6	0.041126	0.042875	0.42143	0.27359	--	--	--	--	--	--
hypothalamus-VS-cerebellum	chr12	90337392	90337459	-0.121924	7	0.00058275	0.00075381	0.14836	0.27028	--	--	--	--	--	--
hypothalamus-VS-cerebellum	chr12	90344864	90344927	0.213761	6	0.041126	0.04946	0.49801	0.28425	--	--	--	--	--	--
hypothalamus-VS-cerebellum	chr12	90346222	90346434	0.151723	8	0.0006216	0.00069715	0.50041	0.34869	--	--	--	--	--	--
hypothalamus-VS-cerebellum	chr12	90348481	90348698	0.175649	11	0.00027501	0.0056885	0.46388	0.28823	--	--	--	--	--	--
hypothalamus-VS-cerebellum	chr12	90360520	90360908	0.16584	16	2.8709e-05	0.0016547	0.32677	0.16093	--	--	--	--	--	--
hypothalamus-VS-cerebellum	chr12	90364147	90364278	0.147126	6	0.0021645	0.0046527	0.37407	0.22695	--	--	--	--	--	--
hypothalamus-VS-cerebellum	chr12	90379912	90379995	0.245902	5	0.0079365	0.012057	0.43753	0.19163	--	--	--	--	--	--
hypothalamus-VS-cerebellum	chr12	90396723	90396778	0.123693	5	0.031746	0.002595	0.36146	0.23777	--	--	--	--	--	--
hypothalamus-VS-cerebellum	chr12	90405458	90405566	0.229605	5	0.0079365	0.0036722	0.30133	0.071722	--	--	--	--	--	--
hypothalamus-VS-cerebellum	chr12	90442022	90442659	0.326239	13	1.3461e-06	0.0004435	0.46957	0.14333	--	--	--	--	--	--
hypothalamus-VS-cerebellum	chr12	90451579	90451791	0.106559	5	0.0079365	0.01855	0.31538	0.20882	--	--	--	--	--	--
hypothalamus-VS-cerebellum	chr12	90451824	90451978	0.316238	14	6.7041e-06	1.3042e-05	0.49397	0.17773	--	--	--	--	--	--
hypothalamus-VS-cerebellum	chr12	90454252	90454589	0.242999	5	0.015873	0.0496	0.52735	0.28435	--	--	--	--	--	--
hypothalamus-VS-cerebellum	chr12	90461504	90461700	0.213348	14	0.00016475	0.00046274	0.41793	0.20458	--	--	--	--	--	--
hypothalamus-VS-cerebellum	chr12	90462113	90462246	0.309662	8	0.0001554	0.00010098	0.51902	0.20935	--	--	--	--	--	--
hypothalamus-VS-cerebellum	chr12	90471832	90472282	0.142418	13	0.0050716	0.0094921	0.36092	0.2185	--	--	--	--	--	--
hypothalamus-VS-cerebellum	chr12	90472830	90472889	0.232633	5	0.0079365	0.012295	0.42511	0.19247	--	--	--	--	--	--
hypothalamus-VS-cerebellum	chr12	90473927	90474433	0.27802	12	3.3282e-05	0.0025327	0.42448	0.14646	--	--	--	--	--	--
hypothalamus-VS-cerebellum	chr12	90480869	90481099	0.2959	10	0.00048713	0.0059339	0.51095	0.21505	--	--	--	--	--	--
hypothalamus-VS-cerebellum	chr12	90482214	90482941	0.145983	14	0.0020805	0.0041215	0.34271	0.19672	--	--	--	--	--	--
hypothalamus-VS-cerebellum	chr12	90484807	90484853	0.211562	5	0.0079365	0.0017936	0.46739	0.25583	--	--	--	--	--	--
hypothalamus-VS-cerebellum	chr12	90488782	90488886	0.223159	5	0.0079365	0.0017219	0.40896	0.1858	--	--	--	--	--	--
hypothalamus-VS-cerebellum	chr12	90493298	90493738	0.150048	12	0.0082932	0.0052905	0.34096	0.19091	--	--	--	--	--	--
hypothalamus-VS-cerebellum	chr12	90496485	90497103	0.19914	9	0.00028795	0.0030449	0.42507	0.22593	--	--	--	--	--	--
hypothalamus-VS-cerebellum	chr12	90502730	90503188	0.192266	10	0.0015047	0.0064019	0.33134	0.13907	--	--	--	--	--	--
hypothalamus-VS-cerebellum	chr12	90504923	90504962	0.127798	5	0.015873	0.014724	0.30447	0.17668	--	--	--	--	--	--
hypothalamus-VS-cerebellum	chr12	90509247	90509468	0.169782	5	0.0079365	0.0034872	0.39096	0.22117	--	--	F7	--	--	--
hypothalamus-VS-cerebellum	chr12	90513818	90514105	0.229777	17	8.0206e-05	0.0027833	0.42239	0.19261	--	--	F7	--	--	--
hypothalamus-VS-cerebellum	chr12	90568971	90569122	0.260274	9	4.1135e-05	0.00030645	0.40347	0.1432	--	--	--	--	--	--
hypothalamus-VS-cerebellum	chr12	90576174	90576381	0.23187	12	0.00020117	0.00044335	0.40965	0.17778	--	--	--	--	--	--
hypothalamus-VS-cerebellum	chr12	90588971	90589011	0.11048	5	0.0079365	0.010685	0.22465	0.11417	--	--	--	--	--	--
hypothalamus-VS-cerebellum	chr12	90617982	90618112	0.156067	8	0.0003108	0.0061027	0.30094	0.14487	--	--	--	LAMP1	--	--
hypothalamus-VS-cerebellum	chr12	90619950	90620071	0.183488	9	0.00049362	0.0027666	0.31468	0.13119	--	--	--	LAMP1	--	GRTP1
hypothalamus-VS-cerebellum	chr12	90630991	90631500	0.169498	7	0.037879	0.044397	0.26703	0.097535	--	--	--	GRTP1	--	--
hypothalamus-VS-cerebellum	chr12	90640995	90641604	0.143274	11	0.0024467	0.013687	0.38922	0.24594	GRTP1	--	--	--	--	--
hypothalamus-VS-cerebellum	chr12	90667996	90668088	0.146205	6	0.004329	0.044001	0.33172	0.18552	--	--	--	ADPRHL1	--	--
hypothalamus-VS-cerebellum	chr12	90678605	90678684	0.262393	8	0.006993	0.0069006	0.49531	0.23292	ADPRHL1	--	--	--	--	--
hypothalamus-VS-cerebellum	chr12	90680740	90680778	0.123721	5	0.015873	0.044002	0.31732	0.1936	--	--	--	--	--	--
hypothalamus-VS-cerebellum	chr12	90695658	90695711	0.179575	6	0.008658	0.04392	0.37274	0.19316	--	--	--	--	--	--
hypothalamus-VS-cerebellum	chr12	90703889	90704244	0.160539	10	0.00032475	0.00096505	0.31641	0.15587	--	--	TMCO3	--	--	--
hypothalamus-VS-cerebellum	chr12	90719704	90720034	0.224272	9	0.0012341	0.0025542	0.45349	0.22921	--	--	TMCO3	--	--	--
hypothalamus-VS-cerebellum	chr12	90746657	90746837	0.228315	11	1.9846e-05	0.0024218	0.38556	0.15725	--	--	--	TFDP1	--	--
hypothalamus-VS-cerebellum	chr12	90749812	90750484	0.195916	18	7.0332e-06	8.0131e-05	0.32087	0.12495	--	--	TFDP1	TFDP1	--	--
hypothalamus-VS-cerebellum	chr12	90752152	90752489	0.152354	8	0.0001554	0.0026815	0.34506	0.1927	--	--	TFDP1	TFDP1	--	--
hypothalamus-VS-cerebellum	chr12	90812983	90813046	0.287519	7	0.0011655	0.0024032	0.47911	0.19159	--	--	--	--	--	--
hypothalamus-VS-cerebellum	chr12	90821995	90822067	0.186344	9	0.00016454	0.0058371	0.36808	0.18174	--	--	--	--	--	--
hypothalamus-VS-cerebellum	chr12	90830442	90830813	0.21471	26	3.9901e-07	0.00039475	0.4	0.18529	--	--	--	--	--	--
hypothalamus-VS-cerebellum	chr12	90839263	90839359	0.242264	7	0.0011655	0.0021162	0.45977	0.21751	--	--	--	--	--	--
hypothalamus-VS-cerebellum	chr12	90841776	90842097	0.240814	5	0.015873	0.005948	0.42188	0.18107	--	--	--	--	--	--
hypothalamus-VS-cerebellum	chr12	90880657	90880718	0.351074	6	0.0021645	0.0052929	0.42022	0.069144	--	--	--	--	--	--
hypothalamus-VS-cerebellum	chr12	90896653	90896978	0.190493	6	0.041126	0.022627	0.37511	0.18462	--	--	--	--	--	--
hypothalamus-VS-cerebellum	chr12	90905053	90905182	0.128107	8	0.028127	0.039028	0.21307	0.084962	--	--	--	--	--	C12H13orf46
hypothalamus-VS-cerebellum	chr12	90951840	90951950	0.189468	6	0.015152	0.0045317	0.47573	0.28626	--	--	--	RASA3	--	--
hypothalamus-VS-cerebellum	chr12	90959281	90959389	0.267546	9	8.2271e-05	0.00040643	0.42754	0.16	--	--	--	RASA3	--	--
hypothalamus-VS-cerebellum	chr12	91020620	91020663	0.322423	5	0.0079365	0.0026127	0.4962	0.17378	--	--	--	--	--	--
hypothalamus-VS-cerebellum	chr13	2011108	2011149	0.297989	5	0.0079365	0.0086402	0.50311	0.20512	--	--	--	--	--	--
hypothalamus-VS-cerebellum	chr13	2018329	2018361	0.275885	5	0.0079365	0.0010294	0.41166	0.13578	--	--	--	--	--	--
hypothalamus-VS-cerebellum	chr13	2018430	2018462	0.180047	5	0.0079365	0.00386	0.37654	0.19649	--	--	--	--	--	--
hypothalamus-VS-cerebellum	chr13	2274214	2274284	0.215057	7	0.006993	0.04189	0.41953	0.20448	--	--	--	PLCB4	--	--
hypothalamus-VS-cerebellum	chr13	3833837	3833916	0.196335	5	0.0079365	0.0037145	0.50556	0.30922	--	--	JAG1	--	JAG1	--
hypothalamus-VS-cerebellum	chr13	3854580	3854931	0.296182	8	0.0010878	0.01495	0.49924	0.20306	--	--	JAG1	JAG1	--	--
hypothalamus-VS-cerebellum	chr13	10337430	10337568	0.21027	6	0.008658	0.047314	0.24581	0.035541	--	--	--	--	--	--
hypothalamus-VS-cerebellum	chr13	10519368	10519540	0.211679	5	0.0079365	0.0039261	0.36603	0.15435	--	--	--	--	--	--
hypothalamus-VS-cerebellum	chr13	12924331	12924445	0.211469	6	0.015152	0.0059028	0.51111	0.29964	--	--	--	--	--	--
hypothalamus-VS-cerebellum	chr13	12966105	12966180	0.325946	6	0.0021645	0.00042752	0.61123	0.28528	--	--	--	--	--	--
hypothalamus-VS-cerebellum	chr13	12990037	12990173	0.370728	5	0.0079365	0.0008475	0.50965	0.13893	--	--	--	--	--	--
hypothalamus-VS-cerebellum	chr13	17292886	17293144	0.218846	6	0.0021645	0.00052769	0.47584	0.25699	--	--	--	--	--	--
hypothalamus-VS-cerebellum	chr13	17432837	17432933	0.278847	5	0.015873	0.0057143	0.40622	0.12737	--	--	--	--	--	--
hypothalamus-VS-cerebellum	chr13	17451089	17451220	0.220372	5	0.0079365	0.04062	0.42238	0.20201	--	--	--	--	--	--
hypothalamus-VS-cerebellum	chr13	17454492	17454653	0.370605	5	0.0079365	0.011074	0.58704	0.21644	--	--	--	--	--	--
hypothalamus-VS-cerebellum	chr13	17640005	17640282	0.192715	9	0.014192	0.031775	0.47271	0.28	--	--	--	--	--	--
hypothalamus-VS-cerebellum	chr13	17755312	17755409	0.269327	5	0.0079365	0.011494	0.42869	0.15936	--	--	--	--	--	--
hypothalamus-VS-cerebellum	chr13	23241710	23241838	0.129122	8	0.014763	0.014972	0.35852	0.22939	--	--	--	--	--	--
hypothalamus-VS-cerebellum	chr13	23241847	23241901	0.270106	5	0.0079365	0.0042508	0.43247	0.16236	--	--	--	--	--	--
hypothalamus-VS-cerebellum	chr13	25656146	25656255	0.483777	5	0.0079365	0.0029188	0.64986	0.16608	--	--	--	--	--	--
hypothalamus-VS-cerebellum	chr13	25735368	25735496	0.221337	8	0.0006216	0.014567	0.42846	0.20713	--	--	--	--	--	--
hypothalamus-VS-cerebellum	chr13	26525336	26525640	0.14959	5	0.0079365	0.036723	0.30324	0.15365	--	--	GPR158	--	--	--
hypothalamus-VS-cerebellum	chr13	38294907	38295277	0.179703	5	0.031746	0.046234	0.40744	0.22774	--	--	--	--	--	--
hypothalamus-VS-cerebellum	chr13	38304152	38304185	0.197042	5	0.0079365	0.0069857	0.41816	0.22112	--	--	--	--	--	--
hypothalamus-VS-cerebellum	chr13	38758756	38758844	0.20161	7	0.0040793	0.037639	0.45604	0.25443	--	--	--	--	--	--
hypothalamus-VS-cerebellum	chr13	38772521	38772851	0.251131	6	0.004329	0.005272	0.46828	0.21715	--	--	--	--	--	--
hypothalamus-VS-cerebellum	chr13	38889200	38889293	0.134787	5	0.0079365	0.016909	0.27453	0.13975	--	--	SEC23B	--	--	--
hypothalamus-VS-cerebellum	chr13	40225415	40226181	0.117717	11	0.0041025	0.014545	0.30661	0.18889	--	--	--	--	--	--
hypothalamus-VS-cerebellum	chr13	42520388	42520635	0.301503	5	0.0079365	0.035484	0.35791	0.056407	--	--	--	--	--	--
hypothalamus-VS-cerebellum	chr13	42543318	42543580	0.108232	5	0.031746	0.021972	0.32347	0.21524	--	--	LOC505033	--	LOC505033	--
hypothalamus-VS-cerebellum	chr13	43154046	43154214	0.175556	9	0.0012341	0.016317	0.37391	0.19835	--	--	ENTPD6	--	--	--
hypothalamus-VS-cerebellum	chr13	43169340	43169594	0.243281	5	0.0079365	0.0010095	0.43321	0.18993	--	--	--	PYGB	--	--
hypothalamus-VS-cerebellum	chr13	46848719	46849192	0.120861	8	0.028127	0.033835	0.3317	0.21083	--	--	--	--	--	--
hypothalamus-VS-cerebellum	chr13	47176738	47176997	0.142059	6	0.008658	0.0078116	0.26322	0.12116	--	--	--	--	--	DIP2C
hypothalamus-VS-cerebellum	chr13	48446782	48447068	0.141309	5	0.0079365	0.0029626	0.36718	0.22587	--	--	CHGB	--	--	--
hypothalamus-VS-cerebellum	chr13	51967525	51967702	0.167406	6	0.004329	0.018471	0.44889	0.28148	--	--	--	--	--	--
hypothalamus-VS-cerebellum	chr13	53675145	53675249	0.360324	5	0.0079365	0.0012351	0.65941	0.29909	--	--	--	SIRPA	--	--
hypothalamus-VS-cerebellum	chr13	53742125	53742305	0.345488	5	0.0079365	0.013277	0.54923	0.20375	--	--	--	--	--	--
hypothalamus-VS-cerebellum	chr13	54166327	54166363	0.209593	5	0.0079365	0.014134	0.46078	0.25119	--	--	MYT1	--	--	--
hypothalamus-VS-cerebellum	chr13	54261476	54261763	0.220226	5	0.015873	0.010795	0.42305	0.20282	OPRL1	--	--	--	--	--
hypothalamus-VS-cerebellum	chr13	54557192	54557360	0.124345	8	0.0001554	0.00072008	0.31862	0.19427	--	--	--	STMN3	--	--
hypothalamus-VS-cerebellum	chr13	54573082	54573221	0.177741	5	0.015873	0.017396	0.36029	0.18255	GMEB2	--	--	--	--	--
hypothalamus-VS-cerebellum	chr13	54587785	54587864	0.257805	5	0.0079365	0.0050115	0.45106	0.19326	--	--	FNDC11	--	--	--
hypothalamus-VS-cerebellum	chr13	54596915	54597061	0.249331	14	0.00028357	0.00099538	0.46648	0.21715	--	--	SRMS	--	--	--
hypothalamus-VS-cerebellum	chr13	54678722	54678872	0.247537	6	0.008658	0.016937	0.33927	0.091731	--	--	--	--	--	--
hypothalamus-VS-cerebellum	chr13	54793983	54794111	0.114839	7	0.0040793	0.036971	0.34911	0.23427	--	--	--	--	--	--
hypothalamus-VS-cerebellum	chr13	54965231	54965510	0.184501	15	0.00045678	0.0036868	0.44045	0.25595	--	--	--	--	--	--
hypothalamus-VS-cerebellum	chr13	55040372	55040463	0.215162	5	0.015873	0.035364	0.4106	0.19544	--	--	--	--	--	--
hypothalamus-VS-cerebellum	chr13	55053544	55054025	0.103419	10	0.0068415	0.015998	0.30372	0.2003	--	--	MRGBP	--	MRGBP	--
hypothalamus-VS-cerebellum	chr13	55161034	55161152	0.16257	7	0.002331	0.0024283	0.32431	0.16175	--	--	SLCO4A1	--	--	--
hypothalamus-VS-cerebellum	chr13	55313249	55313603	0.120879	5	0.015873	0.027743	0.27774	0.15686	--	--	--	--	--	--
hypothalamus-VS-cerebellum	chr13	55407091	55407762	0.210453	17	0.0025799	0.0091673	0.38186	0.17141	--	--	--	--	--	--
hypothalamus-VS-cerebellum	chr13	55417275	55417530	0.150241	6	0.041126	0.014349	0.34438	0.19414	--	--	--	--	--	--
hypothalamus-VS-cerebellum	chr13	55435820	55435996	0.289829	11	2.8351e-06	0.0010248	0.47721	0.18738	--	--	--	ADRM1	--	--
hypothalamus-VS-cerebellum	chr13	55629088	55629167	0.256851	5	0.0079365	0.0035216	0.49365	0.2368	--	--	--	--	--	--
hypothalamus-VS-cerebellum	chr13	55652185	55652288	0.178101	5	0.015873	0.012068	0.43023	0.25213	--	--	--	--	--	--
hypothalamus-VS-cerebellum	chr13	55851117	55851188	0.227904	5	0.0079365	0.014118	0.41617	0.18827	--	--	--	--	--	--
hypothalamus-VS-cerebellum	chr13	57121411	57121443	0.157382	5	0.015873	0.036142	0.36776	0.21038	--	--	--	--	--	--
hypothalamus-VS-cerebellum	chr13	57874042	57874678	0.227745	15	0.00039057	0.0018658	0.45037	0.22262	--	--	TUBB1	--	--	--
hypothalamus-VS-cerebellum	chr13	57876050	57876116	0.156384	5	0.015873	0.015085	0.40838	0.252	--	--	TUBB1	--	--	--
hypothalamus-VS-cerebellum	chr13	57894623	57894842	0.19948	7	0.011072	0.040698	0.43506	0.23558	--	--	CTSZ	--	--	--
hypothalamus-VS-cerebellum	chr13	59294469	59294557	0.328081	5	0.0079365	0.016454	0.48401	0.15593	--	--	RBM38	--	--	--
hypothalamus-VS-cerebellum	chr13	59294558	59294701	0.121742	10	0.0028795	0.0057701	0.33607	0.21432	--	--	RBM38	--	--	--
hypothalamus-VS-cerebellum	chr13	60079590	60079637	0.310924	5	0.0079365	0.016052	0.58661	0.27569	--	--	CSTF1	--	--	--
hypothalamus-VS-cerebellum	chr13	60351361	60351503	0.158416	7	0.002331	0.014814	0.27664	0.11823	--	--	--	--	--	--
hypothalamus-VS-cerebellum	chr13	60839536	60839772	0.181524	8	0.014763	0.019367	0.40605	0.22452	--	--	SLC52A3	--	--	--
hypothalamus-VS-cerebellum	chr13	60931253	60931455	0.112164	5	0.031746	0.021089	0.28532	0.17315	--	--	--	--	--	--
hypothalamus-VS-cerebellum	chr13	61153727	61153981	0.179367	8	0.0018648	0.0026416	0.34465	0.16529	--	--	RBCK1	RBCK1	--	--
hypothalamus-VS-cerebellum	chr13	61179514	61179861	-0.114346	7	0.0011655	0.01498	0.18621	0.30056	--	--	TRIB3	--	--	--
hypothalamus-VS-cerebellum	chr13	62195608	62195735	0.265474	5	0.0079365	0.0045777	0.39533	0.12986	--	--	--	TM9SF4	--	--
hypothalamus-VS-cerebellum	chr13	62427106	62427211	0.282905	7	0.00058275	0.0016435	0.41501	0.13211	--	--	--	--	--	--
hypothalamus-VS-cerebellum	chr13	62583107	62583215	0.118735	8	0.028127	0.035249	0.31933	0.20059	--	--	--	--	--	--
hypothalamus-VS-cerebellum	chr13	64624977	64625161	0.115039	5	0.0079365	0.01461	0.35328	0.23824	--	--	--	--	--	--
hypothalamus-VS-cerebellum	chr13	64835371	64835556	0.189183	5	0.031746	0.010326	0.3956	0.20641	--	--	ACSS2	ACSS2	--	--
hypothalamus-VS-cerebellum	chr13	64907354	64907494	0.2056	10	0.00032475	0.0026743	0.46072	0.25512	--	--	--	--	--	--
hypothalamus-VS-cerebellum	chr13	64911511	64911723	0.150796	12	0.00014422	0.01152	0.39613	0.24534	--	--	--	--	--	TRPC4AP
hypothalamus-VS-cerebellum	chr13	65219877	65220024	0.101681	5	0.0079365	0.0007323	0.24831	0.14663	--	--	--	--	--	--
hypothalamus-VS-cerebellum	chr13	65953511	65953581	0.147446	5	0.015873	0.042586	0.45428	0.30683	--	--	--	--	--	--
hypothalamus-VS-cerebellum	chr13	66204644	66205016	0.223694	5	0.015873	0.034382	0.32675	0.10306	--	--	--	--	--	--
hypothalamus-VS-cerebellum	chr13	66238649	66238797	0.116606	5	0.0079365	0.047387	0.31094	0.19433	--	--	--	--	--	--
hypothalamus-VS-cerebellum	chr13	66631947	66631995	0.180016	7	0.0011655	0.0025994	0.57345	0.39344	--	--	--	RBL1	--	--
hypothalamus-VS-cerebellum	chr13	67003754	67003905	0.127419	8	0.0029526	0.00076938	0.34151	0.21409	--	--	SRC	--	--	--
hypothalamus-VS-cerebellum	chr13	67004584	67004708	0.311868	8	0.0001554	0.00084702	0.50259	0.19072	--	--	SRC	--	--	--
hypothalamus-VS-cerebellum	chr13	67115860	67115916	0.136862	5	0.015873	0.046253	0.3737	0.23684	--	--	BLCAP	--	BLCAP	--
hypothalamus-VS-cerebellum	chr13	67116493	67116580	-0.124287	5	0.015873	0.035302	0.16667	0.29095	NNAT	BLCAP	BLCAP	--	--	--
hypothalamus-VS-cerebellum	chr13	69678910	69678962	0.14852	5	0.031746	0.020614	0.38307	0.23455	--	--	--	--	--	--
hypothalamus-VS-cerebellum	chr13	70513811	70513853	0.148431	5	0.031746	0.039093	0.44656	0.29813	--	--	--	PLCG1	--	--
hypothalamus-VS-cerebellum	chr13	70514988	70515175	0.228662	10	2.165e-05	0.00096054	0.4263	0.19764	--	--	PLCG1	PLCG1	--	--
hypothalamus-VS-cerebellum	chr13	70517809	70517868	0.172475	5	0.015873	0.013533	0.4839	0.31143	--	--	--	PLCG1	--	--
hypothalamus-VS-cerebellum	chr13	70520369	70520537	0.197363	7	0.0040793	0.038498	0.36812	0.17076	--	--	PLCG1	--	--	--
hypothalamus-VS-cerebellum	chr13	70533845	70533884	0.276651	5	0.0079365	0.0025177	0.47377	0.19712	--	--	--	--	--	--
hypothalamus-VS-cerebellum	chr13	70537844	70537887	0.236753	5	0.015873	0.011987	0.44321	0.20646	--	--	--	--	--	--
hypothalamus-VS-cerebellum	chr13	70538268	70538359	0.258916	5	0.0079365	0.046871	0.64811	0.38919	--	--	--	--	--	--
hypothalamus-VS-cerebellum	chr13	70619912	70620157	-0.121234	15	0.00033341	0.022903	0.12935	0.25059	--	--	--	--	--	--
hypothalamus-VS-cerebellum	chr13	70670427	70670602	0.121131	7	0.017483	0.037402	0.27095	0.14982	--	LPIN3	--	LPIN3	--	--
hypothalamus-VS-cerebellum	chr13	70681862	70681962	0.149291	5	0.031746	0.024734	0.46008	0.31079	--	--	--	LPIN3	--	--
hypothalamus-VS-cerebellum	chr13	70682267	70682618	0.221504	9	0.00078157	0.0062884	0.47887	0.25736	--	--	LPIN3	LPIN3	--	--
hypothalamus-VS-cerebellum	chr13	70686152	70686232	0.2293	5	0.0079365	0.0045153	0.59339	0.36409	--	--	--	--	--	--
hypothalamus-VS-cerebellum	chr13	70729642	70729705	0.254514	5	0.0079365	0.0055803	0.43869	0.18418	--	--	--	CHD6	--	--
hypothalamus-VS-cerebellum	chr13	73877290	73877479	0.179263	8	0.0003108	0.0062509	0.34051	0.16125	--	--	--	--	--	--
hypothalamus-VS-cerebellum	chr13	74474577	74474621	0.18704	5	0.015873	0.036973	0.47779	0.29075	--	--	PIGT	--	--	--
hypothalamus-VS-cerebellum	chr13	75316912	75316962	0.24077	5	0.0079365	0.010814	0.43066	0.18989	--	--	TNNC2	--	--	--
hypothalamus-VS-cerebellum	chr13	75326717	75326769	0.295142	7	0.011072	0.0019099	0.50875	0.21361	ACOT8	--	SNX21	--	--	--
hypothalamus-VS-cerebellum	chr13	75414426	75414762	0.184235	13	3.7498e-05	0.0049205	0.41016	0.22593	--	--	PCIF1	PCIF1	--	--
hypothalamus-VS-cerebellum	chr13	75415842	75415878	0.379325	5	0.0079365	0.0049376	0.56766	0.18834	--	--	PCIF1	--	PCIF1	ZNF335
hypothalamus-VS-cerebellum	chr13	75430912	75430970	0.181001	5	0.015873	0.037308	0.35247	0.17147	--	--	ZNF335	--	--	--
hypothalamus-VS-cerebellum	chr13	75513952	75514164	0.148939	11	1.1341e-05	0.0004111	0.24963	0.10069	--	--	SLC12A5	--	SLC12A5	--
hypothalamus-VS-cerebellum	chr13	75832929	75833018	0.193125	6	0.041126	0.041145	0.29286	0.099739	--	--	--	ELMO2	--	--
hypothalamus-VS-cerebellum	chr13	76466338	76466441	0.164848	5	0.031746	0.047264	0.44188	0.27703	--	--	--	EYA2	--	--
hypothalamus-VS-cerebellum	chr13	76502722	76502765	0.12463	5	0.0079365	0.01595	0.24695	0.12232	--	--	ZMYND8	--	--	--
hypothalamus-VS-cerebellum	chr13	76523715	76523758	0.218717	5	0.031746	0.042025	0.33248	0.11376	--	--	ZMYND8	--	--	--
hypothalamus-VS-cerebellum	chr13	77569608	77569661	0.343077	5	0.0079365	0.0052469	0.55547	0.21239	--	--	--	--	--	--
hypothalamus-VS-cerebellum	chr13	77960094	77960184	0.213576	5	0.0079365	0.0025015	0.4023	0.18872	--	--	--	--	--	--
hypothalamus-VS-cerebellum	chr13	78667611	78667770	0.244085	7	0.0011655	0.0056068	0.56196	0.31788	--	--	--	--	--	--
hypothalamus-VS-cerebellum	chr13	78698117	78698165	0.292679	5	0.0079365	0.0063957	0.59589	0.30321	--	--	--	--	--	--
hypothalamus-VS-cerebellum	chr13	78698793	78698924	0.171405	7	0.006993	0.017407	0.38205	0.21064	--	--	--	--	--	--
hypothalamus-VS-cerebellum	chr13	78714897	78715176	0.106602	16	0.0093078	0.032707	0.36773	0.26113	--	--	SPATA2	--	--	--
hypothalamus-VS-cerebellum	chr13	78747176	78747259	0.258497	5	0.0079365	0.011241	0.48376	0.22527	--	--	RNF114	--	RNF114	--
hypothalamus-VS-cerebellum	chr13	79323538	79323914	0.108713	9	0.00078157	0.013829	0.26688	0.15816	--	--	PTPN1	--	--	--
hypothalamus-VS-cerebellum	chr13	79329781	79329834	0.178105	6	0.008658	0.038078	0.41266	0.23455	--	--	--	--	--	--
hypothalamus-VS-cerebellum	chr13	79538068	79538387	0.18179	5	0.031746	0.034625	0.49449	0.3127	--	--	--	--	--	BCAS4
hypothalamus-VS-cerebellum	chr13	80184479	80184553	0.367122	5	0.0079365	0.00066718	0.68504	0.31792	--	--	--	--	--	--
hypothalamus-VS-cerebellum	chr13	80223047	80223420	0.174784	8	0.0018648	0.0056477	0.34263	0.16784	--	--	--	--	--	--
hypothalamus-VS-cerebellum	chr13	80244068	80244164	0.303143	5	0.0079365	0.0026098	0.62444	0.3213	--	--	--	--	--	--
hypothalamus-VS-cerebellum	chr13	80494699	80494832	0.285597	5	0.015873	0.045178	0.49389	0.20829	--	--	--	--	--	--
hypothalamus-VS-cerebellum	chr13	81648379	81648541	0.130139	5	0.0079365	0.010196	0.311	0.18086	--	--	--	--	--	--
hypothalamus-VS-cerebellum	chr13	81861608	81861691	0.34546	6	0.0021645	0.0025781	0.53831	0.19285	--	--	--	--	--	--
hypothalamus-VS-cerebellum	chr13	82692127	82692180	0.245317	5	0.0079365	0.021707	0.37764	0.13232	--	--	--	DOK5	--	--
hypothalamus-VS-cerebellum	chr13	82758013	82758134	0.129869	10	0.0020892	0.014473	0.26957	0.1397	--	--	--	DOK5	--	--
hypothalamus-VS-cerebellum	chr13	82792203	82792519	0.365472	8	0.0006216	0.0012226	0.63311	0.26764	--	--	DOK5	DOK5	--	--
hypothalamus-VS-cerebellum	chr13	82814188	82814665	0.169354	10	7.5776e-05	0.00099006	0.33213	0.16278	--	--	--	--	--	--
hypothalamus-VS-cerebellum	chr13	82834826	82835006	0.245314	5	0.031746	0.03464	0.62689	0.38158	--	--	--	--	--	--
hypothalamus-VS-cerebellum	chr13	82996343	82996496	0.119351	5	0.015873	0.046416	0.28858	0.16923	--	--	--	--	--	--
hypothalamus-VS-cerebellum	chr14	1563830	1564380	0.145753	15	0.0030201	0.039085	0.38282	0.23707	--	--	ARHGAP39	ARHGAP39	--	--
hypothalamus-VS-cerebellum	chr14	1626601	1627009	0.248316	7	0.00058275	0.0068084	0.45015	0.20184	--	GPT	GPT	--	--	--
hypothalamus-VS-cerebellum	chr14	1633024	1634034	0.197998	22	2.9392e-05	0.00011363	0.3718	0.1738	--	PPP1R16A	PPP1R16A	--	--	--
hypothalamus-VS-cerebellum	chr14	1637675	1638289	0.121403	5	0.0079365	0.0016512	0.33996	0.21855	--	--	--	--	--	--
hypothalamus-VS-cerebellum	chr14	1640286	1640647	0.250848	5	0.0079365	0.0044269	0.45317	0.20232	--	--	--	--	--	--
hypothalamus-VS-cerebellum	chr14	1687205	1687822	0.194848	5	0.0079365	0.020863	0.42796	0.23312	--	--	TONSL	TONSL	--	--
hypothalamus-VS-cerebellum	chr14	1731277	1731337	0.222183	5	0.031746	0.010567	0.4267	0.20452	--	--	--	CPSF1	--	--
hypothalamus-VS-cerebellum	chr14	1739439	1739786	0.369562	5	0.015873	0.010975	0.5457	0.17614	--	--	CPSF1	CPSF1	--	--
hypothalamus-VS-cerebellum	chr14	1741922	1742284	0.109067	10	0.023231	0.027952	0.35576	0.24669	--	--	CPSF1	CPSF1	--	ADCK5
hypothalamus-VS-cerebellum	chr14	1791253	1791376	0.27149	8	0.0010878	0.0065542	0.5028	0.23131	--	--	--	--	--	SCRT1
hypothalamus-VS-cerebellum	chr14	1808191	1808613	0.14892	8	0.0003108	0.0062073	0.32049	0.17157	--	--	HSF1	HSF1	--	--
hypothalamus-VS-cerebellum	chr14	1838523	1839060	0.179553	12	0.00037128	0.0010331	0.43145	0.2519	--	--	--	--	--	--
hypothalamus-VS-cerebellum	chr14	1842204	1842779	0.27325	13	3.6536e-06	0.0022306	0.47659	0.20334	--	--	--	--	--	--
hypothalamus-VS-cerebellum	chr14	1845101	1845145	0.13493	5	0.0079365	0.012402	0.35588	0.22095	--	--	--	MROH1	--	--
hypothalamus-VS-cerebellum	chr14	1847133	1847389	0.272503	10	1.0825e-05	0.00038127	0.4744	0.2019	--	--	--	MROH1	--	--
hypothalamus-VS-cerebellum	chr14	1850641	1850832	0.109714	5	0.031746	0.014048	0.33913	0.22941	--	--	--	MROH1	--	--
hypothalamus-VS-cerebellum	chr14	1851487	1851564	0.124447	5	0.015873	0.017591	0.40499	0.28055	--	--	--	MROH1	--	--
hypothalamus-VS-cerebellum	chr14	1915471	1915552	0.250834	5	0.0079365	0.031277	0.34453	0.093694	--	--	--	--	--	--
hypothalamus-VS-cerebellum	chr14	1919673	1919710	0.16173	5	0.0079365	0.0024942	0.26215	0.10042	--	--	--	--	--	--
hypothalamus-VS-cerebellum	chr14	1955431	1955788	0.314163	7	0.00058275	0.00046535	0.6186	0.30444	OPLAH	--	--	--	--	--
hypothalamus-VS-cerebellum	chr14	1959011	1959345	0.225629	5	0.0079365	0.0005609	0.4194	0.19377	--	--	OPLAH	OPLAH	--	--
hypothalamus-VS-cerebellum	chr14	2067176	2067272	0.118486	7	0.011072	0.0065893	0.39542	0.27694	--	--	--	--	--	--
hypothalamus-VS-cerebellum	chr14	2068947	2069017	0.380453	7	0.00058275	0.00021547	0.60252	0.22207	--	--	--	--	--	--
hypothalamus-VS-cerebellum	chr14	2071764	2072040	0.329582	8	0.0001554	0.00050061	0.51201	0.18243	--	--	MIR2309	--	--	--
hypothalamus-VS-cerebellum	chr14	2078735	2078812	0.298171	5	0.0079365	0.013658	0.32603	0.027862	--	--	--	--	--	--
hypothalamus-VS-cerebellum	chr14	2081621	2081853	0.167885	11	0.00018995	1.8654e-05	0.34091	0.17302	--	--	--	--	--	--
hypothalamus-VS-cerebellum	chr14	2085280	2085895	0.199843	16	0.00039597	0.0059702	0.37701	0.17717	--	--	--	--	--	--
hypothalamus-VS-cerebellum	chr14	2129081	2129546	-0.106544	9	0.014192	0.016224	0.13114	0.23769	--	--	--	--	--	--
hypothalamus-VS-cerebellum	chr14	2130457	2130556	0.331999	5	0.0079365	0.046226	0.58929	0.25729	--	--	--	--	--	--
hypothalamus-VS-cerebellum	chr14	2138219	2138364	0.366883	5	0.0079365	0.034421	0.57377	0.20689	--	--	--	--	--	--
hypothalamus-VS-cerebellum	chr14	2140701	2141729	0.125227	20	9.8113e-05	0.0054872	0.24168	0.11646	--	--	--	--	--	--
hypothalamus-VS-cerebellum	chr14	2142282	2142358	0.181222	5	0.0079365	0.0028196	0.29513	0.11391	--	--	--	--	--	--
hypothalamus-VS-cerebellum	chr14	2174431	2174470	0.215519	5	0.0079365	0.010776	0.45408	0.23856	--	--	--	PUF60	--	--
hypothalamus-VS-cerebellum	chr14	2190874	2191189	0.227208	8	0.0029526	0.034768	0.42554	0.19834	--	--	--	--	--	--
hypothalamus-VS-cerebellum	chr14	2195320	2195415	0.220528	5	0.0079365	0.0099727	0.3592	0.13867	--	--	--	--	--	--
hypothalamus-VS-cerebellum	chr14	2196303	2196405	0.103411	5	0.031746	0.011739	0.50135	0.39794	--	--	--	--	--	--
hypothalamus-VS-cerebellum	chr14	2199302	2199590	0.160682	10	0.0028795	0.033433	0.32772	0.16704	--	--	--	--	--	--
hypothalamus-VS-cerebellum	chr14	2201329	2202045	0.189038	18	0.00050095	0.0077318	0.42277	0.23373	--	--	--	--	--	--
hypothalamus-VS-cerebellum	chr14	2202429	2202715	0.202981	14	0.00023709	0.0010159	0.41914	0.21616	--	--	--	--	--	--
hypothalamus-VS-cerebellum	chr14	2202730	2203218	0.210938	5	0.0079365	0.0040645	0.41444	0.20351	--	--	--	--	--	--
hypothalamus-VS-cerebellum	chr14	2219693	2220560	0.210798	38	7.8603e-11	1.9477e-08	0.4001	0.1893	--	--	--	--	--	--
hypothalamus-VS-cerebellum	chr14	2229239	2229334	0.108054	5	0.015873	0.011235	0.24103	0.13297	--	--	--	--	--	--
hypothalamus-VS-cerebellum	chr14	2230025	2230168	0.20256	5	0.0079365	0.014701	0.36652	0.16396	--	--	--	--	--	--
hypothalamus-VS-cerebellum	chr14	2230417	2230440	0.447292	5	0.0079365	0.006026	0.66345	0.21615	--	--	--	--	--	--
hypothalamus-VS-cerebellum	chr14	2230441	2231277	0.212937	21	1.4289e-05	6.5371e-05	0.41264	0.1997	--	--	--	--	--	--
hypothalamus-VS-cerebellum	chr14	2266736	2267002	0.251686	5	0.0079365	0.010732	0.42158	0.1699	--	--	--	--	--	--
hypothalamus-VS-cerebellum	chr14	2306703	2306875	0.190503	7	0.017483	0.0053454	0.36694	0.17644	--	--	--	VAMP2,PYCR3	VAMP2	--
hypothalamus-VS-cerebellum	chr14	2312273	2312384	0.280066	5	0.0079365	0.0051116	0.50829	0.22823	EEF1D	--	--	VAMP2	VAMP2	--
hypothalamus-VS-cerebellum	chr14	2312394	2312494	0.133851	5	0.0079365	0.037014	0.31546	0.18161	EEF1D	--	--	VAMP2	VAMP2	--
hypothalamus-VS-cerebellum	chr14	2322813	2322979	0.193178	9	8.2271e-05	0.0010834	0.47941	0.28623	--	--	--	VAMP2,EEF1D	VAMP2	--
hypothalamus-VS-cerebellum	chr14	2331736	2331824	0.135209	5	0.0079365	0.0094454	0.35123	0.21602	--	--	--	VAMP2	VAMP2	NAPRT
hypothalamus-VS-cerebellum	chr14	2358050	2358115	0.132099	5	0.0079365	0.01219	0.26072	0.12862	--	--	--	VAMP2	VAMP2	--
hypothalamus-VS-cerebellum	chr14	2359499	2359932	0.224364	5	0.0079365	0.005425	0.47374	0.24937	--	--	--	VAMP2	VAMP2	--
hypothalamus-VS-cerebellum	chr14	2360642	2360986	0.156262	5	0.0079365	0.00061541	0.38254	0.22627	--	--	--	VAMP2	VAMP2	--
hypothalamus-VS-cerebellum	chr14	2370203	2370709	0.240544	8	0.0018648	0.0057006	0.43978	0.19923	--	--	--	VAMP2	VAMP2	--
hypothalamus-VS-cerebellum	chr14	2375067	2375166	0.208703	8	0.014763	0.038382	0.38872	0.18001	--	--	--	VAMP2	VAMP2	--
hypothalamus-VS-cerebellum	chr14	2377318	2377654	0.231957	10	0.00048713	0.014118	0.5821	0.35014	--	--	--	VAMP2	VAMP2	--
hypothalamus-VS-cerebellum	chr14	2381817	2381858	0.271243	5	0.0079365	0.0027687	0.47469	0.20344	--	--	--	VAMP2	VAMP2	--
hypothalamus-VS-cerebellum	chr14	2383094	2383242	0.239543	5	0.0079365	0.0029872	0.45931	0.21976	--	--	--	VAMP2	VAMP2	--
hypothalamus-VS-cerebellum	chr14	2383838	2383956	0.302332	7	0.0011655	0.0055632	0.51904	0.21671	--	--	--	VAMP2	VAMP2	--
hypothalamus-VS-cerebellum	chr14	2394199	2394297	0.289494	5	0.015873	0.03646	0.48416	0.19466	--	--	--	VAMP2	VAMP2	--
hypothalamus-VS-cerebellum	chr14	2400132	2400252	0.22571	8	0.0006216	0.015807	0.48699	0.26128	--	--	--	VAMP2	VAMP2	--
hypothalamus-VS-cerebellum	chr14	2406851	2407136	0.253771	7	0.00058275	0.001809	0.41898	0.16521	--	--	VAMP2	VAMP2	VAMP2	--
hypothalamus-VS-cerebellum	chr14	2410060	2410269	0.263036	5	0.0079365	0.0015887	0.52688	0.26385	--	--	--	VAMP2	VAMP2	--
hypothalamus-VS-cerebellum	chr14	2416073	2416175	0.210224	8	0.0018648	0.015908	0.40579	0.19556	--	--	--	VAMP2	VAMP2	--
hypothalamus-VS-cerebellum	chr14	2500224	2500939	0.182574	15	0.00097547	0.012848	0.36327	0.1807	--	--	--	--	--	--
hypothalamus-VS-cerebellum	chr14	2501829	2501912	0.236647	5	0.0079365	0.034605	0.44626	0.20961	--	--	--	--	--	--
hypothalamus-VS-cerebellum	chr14	2551872	2552719	0.175416	7	0.00058275	0.0022546	0.32894	0.15353	--	--	--	--	--	--
hypothalamus-VS-cerebellum	chr14	2584497	2584681	0.101476	5	0.0079365	0.041595	0.29603	0.19456	--	--	--	--	--	--
hypothalamus-VS-cerebellum	chr14	2788847	2789005	0.181396	7	0.0011655	0.0020148	0.36668	0.18528	--	--	--	--	--	--
hypothalamus-VS-cerebellum	chr14	2794614	2794818	0.253087	8	0.0001554	0.0037982	0.44819	0.1951	--	--	--	--	--	--
hypothalamus-VS-cerebellum	chr14	2831039	2831130	0.24483	5	0.0079365	0.001238	0.40733	0.1625	--	--	--	--	--	--
hypothalamus-VS-cerebellum	chr14	2876148	2876228	0.175177	5	0.0079365	0.013845	0.42917	0.254	--	--	--	--	--	--
hypothalamus-VS-cerebellum	chr14	2889335	2889464	0.242467	8	0.0029526	0.042014	0.48798	0.24551	--	--	--	--	--	--
hypothalamus-VS-cerebellum	chr14	2890634	2890698	0.177195	5	0.0079365	0.0045316	0.41479	0.2376	--	--	--	--	--	--
hypothalamus-VS-cerebellum	chr14	2901254	2901533	0.168741	9	0.0056355	0.016016	0.38676	0.21801	--	--	--	--	--	--
hypothalamus-VS-cerebellum	chr14	2943146	2943502	0.197803	7	0.0040793	0.016144	0.30166	0.10386	--	--	--	--	--	--
hypothalamus-VS-cerebellum	chr14	2949241	2949331	0.227338	8	0.0001554	0.00022248	0.40166	0.17432	--	--	ADGRB1	--	ADGRB1	--
hypothalamus-VS-cerebellum	chr14	2961992	2962072	0.262368	7	0.00058275	0.001773	0.5485	0.28613	--	--	--	ADGRB1	--	--
hypothalamus-VS-cerebellum	chr14	3002163	3002225	-0.136547	5	0.0079365	0.010828	0.19611	0.33266	--	--	--	ADGRB1	--	--
hypothalamus-VS-cerebellum	chr14	3023531	3023674	0.27569	11	1.1341e-05	0.0028038	0.56075	0.28506	--	--	--	--	--	--
hypothalamus-VS-cerebellum	chr14	3033953	3034096	0.342045	5	0.0079365	0.015906	0.60913	0.26708	--	--	--	--	--	--
hypothalamus-VS-cerebellum	chr14	3038389	3039611	0.13571	23	0.00035699	0.0019229	0.37476	0.23905	--	--	--	--	--	--
hypothalamus-VS-cerebellum	chr14	3051141	3051358	0.211686	5	0.0079365	0.034316	0.41118	0.19949	--	--	--	--	--	--
hypothalamus-VS-cerebellum	chr14	3076756	3077043	0.123159	5	0.0079365	0.019232	0.29964	0.17648	--	TSNARE1	--	TSNARE1	--	--
hypothalamus-VS-cerebellum	chr14	3078278	3078605	-0.142949	8	0.0001554	0.00030706	0.16335	0.3063	--	TSNARE1	--	TSNARE1	--	--
hypothalamus-VS-cerebellum	chr14	3086612	3086799	0.317463	9	4.1135e-05	0.0012851	0.48291	0.16545	--	TSNARE1	--	TSNARE1	--	--
hypothalamus-VS-cerebellum	chr14	3088123	3088378	0.219749	13	0.00017326	0.00044769	0.43755	0.2178	--	TSNARE1	--	TSNARE1	--	--
hypothalamus-VS-cerebellum	chr14	3095522	3096077	0.151631	17	0.00014123	0.00037023	0.32173	0.1701	--	--	--	TSNARE1	--	--
hypothalamus-VS-cerebellum	chr14	3114221	3114256	0.240568	5	0.0079365	0.0013501	0.59373	0.35316	--	--	--	TSNARE1	--	--
hypothalamus-VS-cerebellum	chr14	3116402	3116632	0.299227	7	0.00058275	0.0019153	0.50689	0.20767	--	--	--	TSNARE1	--	--
hypothalamus-VS-cerebellum	chr14	3116649	3116986	0.202392	6	0.0021645	0.04125	0.36113	0.15874	--	--	--	TSNARE1	--	--
hypothalamus-VS-cerebellum	chr14	3124106	3124230	0.21425	7	0.0011655	0.01621	0.40487	0.19062	--	--	--	TSNARE1	--	--
hypothalamus-VS-cerebellum	chr14	3125238	3125535	0.276618	7	0.00058275	0.00047986	0.48117	0.20455	--	--	--	TSNARE1	--	--
hypothalamus-VS-cerebellum	chr14	3128624	3129104	0.149922	17	0.00031901	0.0027854	0.32158	0.17166	--	--	--	TSNARE1	--	--
hypothalamus-VS-cerebellum	chr14	3131577	3132895	0.241768	23	5.7159e-06	0.00035255	0.47509	0.23332	--	--	--	TSNARE1	--	--
hypothalamus-VS-cerebellum	chr14	3140172	3140358	0.215502	8	0.006993	0.014625	0.4857	0.2702	--	--	--	TSNARE1	--	--
hypothalamus-VS-cerebellum	chr14	3161639	3161724	0.12132	7	0.037879	0.043466	0.29884	0.17752	--	--	TSNARE1	--	--	--
hypothalamus-VS-cerebellum	chr14	3182953	3183032	0.275574	5	0.0079365	0.012188	0.48116	0.20558	--	--	--	--	--	--
hypothalamus-VS-cerebellum	chr14	3185434	3185679	0.119662	8	0.028127	0.01549	0.33495	0.21529	--	--	--	--	--	--
hypothalamus-VS-cerebellum	chr14	3192435	3192629	0.318654	6	0.004329	0.015965	0.49406	0.1754	--	--	--	--	--	--
hypothalamus-VS-cerebellum	chr14	3193866	3193971	0.254013	5	0.0079365	0.00057718	0.48265	0.22863	--	--	--	--	--	--
hypothalamus-VS-cerebellum	chr14	3194299	3194680	0.23182	12	7.1741e-05	0.0010962	0.41933	0.18751	--	--	--	--	--	--
hypothalamus-VS-cerebellum	chr14	3195254	3195605	0.208309	10	0.00105	0.00096954	0.42524	0.21693	--	--	--	--	--	--
hypothalamus-VS-cerebellum	chr14	3196162	3196468	0.111252	5	0.0079365	0.018619	0.4342	0.32294	--	--	--	--	--	--
hypothalamus-VS-cerebellum	chr14	3256825	3256924	0.224941	7	0.00058275	0.0023245	0.42164	0.1967	--	--	--	--	--	--
hypothalamus-VS-cerebellum	chr14	3606716	3607118	0.184444	10	0.0028795	0.028056	0.38866	0.20422	--	--	--	--	--	--
hypothalamus-VS-cerebellum	chr14	3637122	3637270	0.102896	7	0.002331	0.014717	0.26195	0.15906	--	--	--	--	--	--
hypothalamus-VS-cerebellum	chr14	3684223	3684432	0.199246	8	0.006993	0.045702	0.34032	0.14107	--	--	--	--	--	--
hypothalamus-VS-cerebellum	chr14	3686010	3686145	0.283669	7	0.00058275	0.002546	0.4614	0.17773	--	--	--	--	--	--
hypothalamus-VS-cerebellum	chr14	3687659	3687891	0.189297	8	0.0001554	8.4732e-05	0.34404	0.15474	--	--	--	--	--	--
hypothalamus-VS-cerebellum	chr14	3687938	3688077	0.280001	5	0.0079365	0.0026073	0.47874	0.19874	--	--	--	--	--	--
hypothalamus-VS-cerebellum	chr14	3694972	3695202	0.224706	17	3.855e-05	8.3899e-05	0.52338	0.29867	--	--	--	--	--	--
hypothalamus-VS-cerebellum	chr14	3730907	3730961	0.27663	8	0.0001554	0.00083319	0.48163	0.205	--	--	--	--	--	--
hypothalamus-VS-cerebellum	chr14	3732975	3733169	0.124387	11	0.015769	0.011729	0.29156	0.16717	--	--	--	--	--	--
hypothalamus-VS-cerebellum	chr14	3740594	3740806	0.121759	5	0.015873	0.020378	0.30828	0.18652	--	--	--	--	--	--
hypothalamus-VS-cerebellum	chr14	3743169	3743260	-0.165012	5	0.0079365	0.0077078	0.37657	0.54158	--	--	--	--	--	--
hypothalamus-VS-cerebellum	chr14	3807965	3808054	0.105358	7	0.037879	0.022344	0.44568	0.34032	--	--	--	--	--	--
hypothalamus-VS-cerebellum	chr14	3897615	3897706	0.27618	5	0.0079365	0.011545	0.40373	0.12755	--	PTK2	--	PTK2	--	--
hypothalamus-VS-cerebellum	chr14	3901804	3901834	0.25992	5	0.0079365	0.0050164	0.50723	0.24731	--	PTK2	--	PTK2	--	--
hypothalamus-VS-cerebellum	chr14	4005888	4006005	0.377217	7	0.00058275	0.00076161	0.64374	0.26652	--	--	--	PTK2	--	--
hypothalamus-VS-cerebellum	chr14	4058379	4058952	0.173496	14	0.0032752	0.015168	0.44445	0.27096	--	--	--	PTK2	--	--
hypothalamus-VS-cerebellum	chr14	4059633	4059711	0.15441	5	0.031746	0.03505	0.33354	0.17913	--	--	PTK2	--	--	--
hypothalamus-VS-cerebellum	chr14	4098074	4098210	0.287246	15	1.2091e-05	0.00043191	0.48523	0.19798	--	--	--	AGO2	--	--
hypothalamus-VS-cerebellum	chr14	4107954	4108108	0.192424	15	0.0001742	0.00043235	0.40523	0.21281	--	--	--	AGO2	--	--
hypothalamus-VS-cerebellum	chr14	4108710	4108777	0.195161	5	0.031746	0.010089	0.43734	0.24218	--	--	--	AGO2	--	--
hypothalamus-VS-cerebellum	chr14	4112411	4112525	0.336066	5	0.0079365	0.010294	0.48604	0.14998	--	--	--	AGO2	--	--
hypothalamus-VS-cerebellum	chr14	4137415	4137530	0.287967	5	0.0079365	0.0098543	0.46626	0.17829	--	--	--	AGO2	--	--
hypothalamus-VS-cerebellum	chr14	4156683	4156881	0.217505	11	0.0018599	0.0025148	0.42868	0.21117	--	--	--	AGO2	--	--
hypothalamus-VS-cerebellum	chr14	4248809	4248911	0.280555	5	0.0079365	0.0011105	0.4881	0.20755	--	--	--	TRAPPC9	--	--
hypothalamus-VS-cerebellum	chr14	4278871	4278982	0.218446	5	0.015873	0.010645	0.28273	0.064286	--	--	--	TRAPPC9	--	--
hypothalamus-VS-cerebellum	chr14	4284372	4284520	0.241799	5	0.0079365	0.0026678	0.4171	0.1753	--	--	TRAPPC9	--	--	--
hypothalamus-VS-cerebellum	chr14	4309794	4310042	0.149883	16	0.0032849	0.0059919	0.32041	0.17052	--	--	--	TRAPPC9	--	--
hypothalamus-VS-cerebellum	chr14	4352062	4352141	0.149499	7	0.011072	0.026411	0.40116	0.25166	--	--	TRAPPC9	--	--	--
hypothalamus-VS-cerebellum	chr14	4411901	4412124	0.217142	5	0.0079365	0.010079	0.44618	0.22904	--	--	--	TRAPPC9	--	--
hypothalamus-VS-cerebellum	chr14	4416366	4416539	0.2018	6	0.015152	0.03939	0.38633	0.18453	--	--	--	TRAPPC9	--	--
hypothalamus-VS-cerebellum	chr14	4419059	4419562	0.326862	19	4.7513e-07	1.4337e-06	0.58425	0.25739	--	--	--	TRAPPC9	--	--
hypothalamus-VS-cerebellum	chr14	4434584	4434648	0.37673	5	0.0079365	0.0029781	0.45108	0.074355	--	--	--	TRAPPC9	--	--
hypothalamus-VS-cerebellum	chr14	4442929	4443403	0.169385	8	0.004662	0.014486	0.42373	0.25435	--	--	--	TRAPPC9	--	--
hypothalamus-VS-cerebellum	chr14	4472185	4472282	0.123943	9	8.2271e-05	0.00030125	0.24424	0.1203	--	--	TRAPPC9	--	--	--
hypothalamus-VS-cerebellum	chr14	4482586	4482748	0.233519	9	0.00028795	0.0029287	0.4743	0.24078	--	--	--	TRAPPC9	--	--
hypothalamus-VS-cerebellum	chr14	4496002	4496045	0.246685	5	0.0079365	0.0031171	0.40149	0.1548	--	--	--	TRAPPC9	--	--
hypothalamus-VS-cerebellum	chr14	4503561	4503664	0.182317	5	0.0079365	0.0014	0.35439	0.17207	--	--	--	TRAPPC9	--	--
hypothalamus-VS-cerebellum	chr14	4530032	4530136	0.178624	5	0.0079365	0.016252	0.39825	0.21963	--	--	--	TRAPPC9	--	--
hypothalamus-VS-cerebellum	chr14	4542396	4542484	0.219724	7	0.0011655	0.036658	0.51295	0.29322	--	--	--	TRAPPC9	--	--
hypothalamus-VS-cerebellum	chr14	4545232	4545503	0.233881	16	1.7349e-05	3.7655e-05	0.45573	0.22185	--	--	--	TRAPPC9	--	--
hypothalamus-VS-cerebellum	chr14	4546714	4547133	0.223327	11	1.1341e-05	0.011882	0.4316	0.20827	--	--	--	TRAPPC9	--	--
hypothalamus-VS-cerebellum	chr14	4551443	4551547	0.144347	7	0.006993	0.0023625	0.41001	0.26567	--	--	--	TRAPPC9	--	--
hypothalamus-VS-cerebellum	chr14	4556536	4556624	0.124561	5	0.0079365	0.011007	0.29676	0.1722	--	--	--	TRAPPC9	--	--
hypothalamus-VS-cerebellum	chr14	4558930	4559168	0.272079	6	0.0021645	0.0027002	0.41524	0.14316	--	--	--	TRAPPC9	--	--
hypothalamus-VS-cerebellum	chr14	4577340	4577474	0.315389	7	0.0011655	0.015509	0.65982	0.34443	--	--	--	TRAPPC9	--	--
hypothalamus-VS-cerebellum	chr14	4578708	4578752	0.212398	5	0.0079365	0.012433	0.49854	0.28614	--	--	--	TRAPPC9	--	--
hypothalamus-VS-cerebellum	chr14	4581450	4581810	0.195775	16	7.579e-05	0.0031989	0.42236	0.22659	--	--	--	TRAPPC9	--	--
hypothalamus-VS-cerebellum	chr14	4592240	4592319	0.256273	5	0.015873	0.035361	0.39491	0.13864	--	--	--	TRAPPC9	--	--
hypothalamus-VS-cerebellum	chr14	4604497	4605145	0.1913	13	0.00079495	0.0092295	0.40873	0.21743	--	--	--	TRAPPC9	--	--
hypothalamus-VS-cerebellum	chr14	4607497	4607960	0.25375	23	3.2902e-08	3.2639e-06	0.43702	0.18327	--	--	--	TRAPPC9	--	--
hypothalamus-VS-cerebellum	chr14	4613931	4614174	0.199594	7	0.00058275	0.0017522	0.34402	0.14442	--	--	--	TRAPPC9	--	--
hypothalamus-VS-cerebellum	chr14	4615075	4615163	0.169046	5	0.0079365	0.015115	0.31107	0.14203	--	--	TRAPPC9	--	--	--
hypothalamus-VS-cerebellum	chr14	4701763	4701821	0.304815	7	0.00058275	0.00058673	0.46551	0.16069	--	--	--	KCNK9	--	--
hypothalamus-VS-cerebellum	chr14	5114173	5114260	0.252853	5	0.0079365	0.02428	0.49552	0.24267	--	--	--	--	--	--
hypothalamus-VS-cerebellum	chr14	5191937	5192158	0.456595	5	0.0079365	0.003612	0.63482	0.17823	--	--	--	--	--	--
hypothalamus-VS-cerebellum	chr14	5332922	5333025	0.181279	5	0.015873	0.019368	0.35949	0.17821	--	--	--	--	--	--
hypothalamus-VS-cerebellum	chr14	7259818	7259908	0.261035	5	0.0079365	0.024813	0.50333	0.2423	--	--	--	--	--	--
hypothalamus-VS-cerebellum	chr14	7474214	7474312	0.27072	6	0.0021645	0.0012558	0.43427	0.16355	--	--	--	KHDRBS3	--	--
hypothalamus-VS-cerebellum	chr14	8202481	8202535	0.149603	5	0.031746	0.039587	0.43226	0.28266	--	--	--	--	--	--
hypothalamus-VS-cerebellum	chr14	8214732	8215318	0.179185	12	0.00027439	0.0023735	0.39281	0.21362	--	--	--	--	--	--
hypothalamus-VS-cerebellum	chr14	8250187	8250540	0.197153	5	0.015873	0.034998	0.34681	0.14966	--	--	--	--	--	--
hypothalamus-VS-cerebellum	chr14	8252098	8252169	0.212482	5	0.0079365	0.047167	0.41151	0.19903	--	--	--	--	--	--
hypothalamus-VS-cerebellum	chr14	11442496	11442544	0.210614	5	0.0079365	0.0027533	0.40202	0.19141	--	--	--	ASAP1	--	--
hypothalamus-VS-cerebellum	chr14	11674208	11674448	0.102282	7	0.026224	0.049859	0.33577	0.23349	--	--	ASAP1	ASAP1	--	--
hypothalamus-VS-cerebellum	chr14	13537120	13537262	0.146951	5	0.0079365	0.0027278	0.29144	0.14449	--	--	--	--	--	--
hypothalamus-VS-cerebellum	chr14	18386674	18386911	0.205554	5	0.015873	0.010353	0.41299	0.20744	--	--	ZHX2	--	--	--
hypothalamus-VS-cerebellum	chr14	18477678	18477768	0.196269	5	0.015873	0.036738	0.45965	0.26338	--	--	--	--	--	--
hypothalamus-VS-cerebellum	chr14	18499449	18499603	0.159916	8	0.006993	0.015748	0.44973	0.28982	--	--	--	--	--	--
hypothalamus-VS-cerebellum	chr14	18529151	18529539	0.191214	6	0.041126	0.014665	0.35491	0.16369	--	--	--	--	--	--
hypothalamus-VS-cerebellum	chr14	20746137	20746505	0.14279	8	0.0006216	0.0074118	0.34034	0.19755	--	--	--	--	--	--
hypothalamus-VS-cerebellum	chr14	20948358	20949013	0.106794	12	0.0014326	0.010908	0.25483	0.14803	--	--	--	--	--	--
hypothalamus-VS-cerebellum	chr14	21041914	21041986	0.360934	6	0.004329	0.0022048	0.50268	0.14175	--	--	PRKDC	--	--	--
hypothalamus-VS-cerebellum	chr14	21052684	21052861	0.100952	9	0.018758	0.032691	0.30007	0.19912	--	--	--	PRKDC	--	--
hypothalamus-VS-cerebellum	chr14	21502828	21502932	0.189133	6	0.0021645	0.00027677	0.35736	0.16823	--	--	--	--	--	--
hypothalamus-VS-cerebellum	chr14	21535642	21535717	0.188506	5	0.0079365	0.0008483	0.23703	0.04852	--	--	--	--	--	--
hypothalamus-VS-cerebellum	chr14	22850395	22850516	-0.140262	5	0.0079365	0.019356	0.061114	0.20138	--	--	--	--	--	--
hypothalamus-VS-cerebellum	chr14	23168243	23168325	0.204707	5	0.0079365	0.00097052	0.42965	0.22494	--	--	RB1CC1	--	--	--
hypothalamus-VS-cerebellum	chr14	23818297	23818605	0.191034	7	0.006993	0.043417	0.41193	0.2209	--	--	--	--	--	--
hypothalamus-VS-cerebellum	chr14	24461841	24461926	0.280087	5	0.031746	0.0055806	0.64833	0.36825	--	--	--	--	--	--
hypothalamus-VS-cerebellum	chr14	26483724	26484034	0.212225	5	0.031746	0.011614	0.41107	0.19884	--	--	--	--	--	--
hypothalamus-VS-cerebellum	chr14	28149471	28149677	0.265797	5	0.0079365	0.0034673	0.49096	0.22516	--	--	--	--	--	--
hypothalamus-VS-cerebellum	chr14	28158056	28158132	0.206785	5	0.031746	0.017871	0.44722	0.24044	--	--	--	--	--	--
hypothalamus-VS-cerebellum	chr14	28159120	28159294	0.281292	9	8.2271e-05	0.0073092	0.47106	0.18977	--	--	--	--	--	--
hypothalamus-VS-cerebellum	chr14	28170292	28170879	0.208496	15	0.00012469	0.0004397	0.42798	0.21948	--	--	--	--	--	--
hypothalamus-VS-cerebellum	chr14	28232883	28233199	0.260762	5	0.0079365	0.0025106	0.47752	0.21676	--	--	--	--	--	--
hypothalamus-VS-cerebellum	chr14	39719144	39719728	0.108919	14	0.024358	0.015385	0.33048	0.22156	--	--	JPH1	--	--	--
hypothalamus-VS-cerebellum	chr14	62097773	62098364	0.159097	13	0.00013038	0.0048811	0.29444	0.13534	--	--	--	--	--	--
hypothalamus-VS-cerebellum	chr14	68168786	68169182	0.146362	9	0.024434	0.014003	0.32506	0.1787	--	--	--	--	--	--
hypothalamus-VS-cerebellum	chr14	69489674	69489996	0.123389	5	0.031746	0.036447	0.37174	0.24835	--	--	--	CPQ	--	--
hypothalamus-VS-cerebellum	chr14	69500321	69500509	0.193393	5	0.0079365	0.001988	0.41275	0.21936	--	--	--	CPQ	--	--
hypothalamus-VS-cerebellum	chr14	69511134	69511254	0.140268	5	0.0079365	0.00057702	0.31163	0.17136	--	--	--	CPQ	--	--
hypothalamus-VS-cerebellum	chr14	69514207	69514412	0.151947	5	0.0079365	0.0099188	0.34763	0.19568	--	--	--	CPQ	--	--
hypothalamus-VS-cerebellum	chr14	69518400	69518504	0.206177	5	0.015873	0.03799	0.37548	0.1693	--	--	--	CPQ	--	--
hypothalamus-VS-cerebellum	chr14	70117819	70118008	0.138327	7	0.00058275	0.00047923	0.31303	0.17471	--	--	--	--	--	--
hypothalamus-VS-cerebellum	chr14	71832416	71832447	0.338626	5	0.0079365	0.00055898	0.51046	0.17184	--	--	--	INTS8	--	--
hypothalamus-VS-cerebellum	chr14	76766672	76766720	0.203392	5	0.0079365	0.039135	0.56283	0.35943	--	--	--	MMP16	--	--
hypothalamus-VS-cerebellum	chr14	83539989	83540091	0.21016	7	0.0040793	0.015808	0.55	0.33984	--	--	--	--	--	--
hypothalamus-VS-cerebellum	chr14	83708538	83708691	-0.190284	8	0.004662	0.026043	0.22651	0.41679	--	--	--	DEPTOR	--	--
hypothalamus-VS-cerebellum	chr15	14427521	14427636	0.325999	5	0.0079365	0.0073323	0.5829	0.2569	--	--	MAML2	--	--	--
hypothalamus-VS-cerebellum	chr15	16242596	16242665	0.233763	9	0.00078157	0.032412	0.63572	0.40195	--	--	FUT4	--	--	--
hypothalamus-VS-cerebellum	chr15	22376449	22376530	0.182197	6	0.041126	0.023143	0.40814	0.22594	--	--	--	--	--	--
hypothalamus-VS-cerebellum	chr15	24153362	24153423	0.319262	5	0.0079365	0.012565	0.58835	0.26909	--	--	--	NCAM1	--	--
hypothalamus-VS-cerebellum	chr15	29675687	29675784	0.244511	5	0.0079365	0.00618	0.47656	0.23205	--	UPK2	--	UPK2	--	--
hypothalamus-VS-cerebellum	chr15	29791289	29791943	0.232219	12	0.00020117	0.00048754	0.37421	0.142	--	PHLDB1,UPK2	--	PHLDB1,UPK2	--	--
hypothalamus-VS-cerebellum	chr15	29810477	29810522	0.123857	5	0.0079365	0.013557	0.4262	0.30235	--	UPK2	PHLDB1	UPK2	--	--
hypothalamus-VS-cerebellum	chr15	29814369	29814647	0.182074	7	0.0011655	0.0085592	0.35758	0.17551	--	UPK2	PHLDB1	UPK2	--	--
hypothalamus-VS-cerebellum	chr15	30024593	30024895	0.186556	6	0.008658	0.0084359	0.40326	0.21671	--	UPK2	BCL9L	UPK2	--	--
hypothalamus-VS-cerebellum	chr15	30026127	30026288	0.225029	6	0.004329	0.013559	0.45817	0.23314	--	UPK2	BCL9L	UPK2	--	--
hypothalamus-VS-cerebellum	chr15	30027140	30027650	0.239352	15	7.4588e-05	0.00019514	0.44629	0.20694	--	UPK2	BCL9L	BCL9L,UPK2	--	--
hypothalamus-VS-cerebellum	chr15	30757061	30757197	0.150926	9	0.0077746	0.034029	0.44748	0.29655	--	--	NECTIN1	--	--	--
hypothalamus-VS-cerebellum	chr15	31115743	31116109	0.265744	5	0.031746	0.014317	0.36599	0.10024	--	--	--	--	--	--
hypothalamus-VS-cerebellum	chr15	35251695	35251758	0.277771	5	0.0079365	0.0022069	0.62688	0.34911	--	--	--	SERGEF	--	--
hypothalamus-VS-cerebellum	chr15	35651235	35651305	0.271697	8	0.0010878	0.01567	0.51221	0.24051	--	--	KCNJ11	--	--	--
hypothalamus-VS-cerebellum	chr15	38997355	38997513	0.201389	10	0.0001299	0.0026791	0.42114	0.21975	--	--	SPON1	SPON1	--	--
hypothalamus-VS-cerebellum	chr15	39851357	39851452	0.22784	5	0.0079365	0.04045	0.42384	0.196	--	--	--	ARNTL	--	--
hypothalamus-VS-cerebellum	chr15	41961939	41961999	0.168058	7	0.0011655	0.0028116	0.38041	0.21235	--	--	GALNT18	--	--	--
hypothalamus-VS-cerebellum	chr15	44441743	44441806	0.326785	5	0.0079365	0.026544	0.62315	0.29636	--	--	DENND2B	--	--	--
hypothalamus-VS-cerebellum	chr15	44783889	44783981	0.194233	5	0.015873	0.038407	0.43501	0.24078	--	--	--	--	--	--
hypothalamus-VS-cerebellum	chr15	45040869	45041087	0.309997	5	0.0079365	0.024085	0.3866	0.076602	--	--	TUB	--	--	--
hypothalamus-VS-cerebellum	chr15	47061608	47062533	0.250165	18	1.6862e-05	0.00067093	0.43384	0.18367	--	--	--	--	--	--
hypothalamus-VS-cerebellum	chr15	47063748	47064322	0.239465	11	0.00012758	0.012102	0.44347	0.20401	TPP1	--	--	--	--	--
hypothalamus-VS-cerebellum	chr15	47127171	47127263	0.158694	7	0.00058275	0.015494	0.40624	0.24755	--	--	--	--	--	--
hypothalamus-VS-cerebellum	chr15	47210863	47211440	0.308888	24	3.2749e-08	2.8789e-06	0.50027	0.19138	--	--	TRIM3	--	--	--
hypothalamus-VS-cerebellum	chr15	47330796	47330852	0.303927	5	0.0079365	0.011005	0.5384	0.23448	--	--	CAVIN3	--	--	--
hypothalamus-VS-cerebellum	chr15	53035680	53035757	0.160683	5	0.031746	0.035732	0.42336	0.26267	--	--	--	--	--	--
hypothalamus-VS-cerebellum	chr15	53085522	53085776	0.190706	6	0.004329	0.029314	0.26221	0.071499	--	--	--	--	--	STARD10
hypothalamus-VS-cerebellum	chr15	53583520	53583646	0.283658	7	0.00058275	0.0021309	0.52514	0.24148	--	--	ARHGEF17	--	--	--
hypothalamus-VS-cerebellum	chr15	55390967	55391130	0.132994	5	0.031746	0.011613	0.40547	0.27248	--	--	--	--	--	GDPD5
hypothalamus-VS-cerebellum	chr15	57315671	57315799	0.234467	7	0.00058275	0.0056719	0.45435	0.21989	--	--	--	--	--	CAPN5
hypothalamus-VS-cerebellum	chr15	57344020	57344123	0.265056	5	0.0079365	0.0030665	0.44737	0.18232	--	--	--	--	--	--
hypothalamus-VS-cerebellum	chr15	63801193	63801276	0.131693	5	0.0079365	0.044944	0.30916	0.17747	--	--	--	--	--	--
hypothalamus-VS-cerebellum	chr15	65045350	65045425	0.303975	5	0.015873	0.013053	0.42015	0.11617	--	--	--	--	--	--
hypothalamus-VS-cerebellum	chr15	65081596	65081779	0.228566	5	0.0079365	0.0012971	0.38411	0.15555	--	--	--	--	--	--
hypothalamus-VS-cerebellum	chr15	67044159	67044276	0.430733	5	0.0079365	0.016733	0.50373	0.072997	--	--	--	TRIM44	--	--
hypothalamus-VS-cerebellum	chr15	67733878	67734146	0.286743	5	0.0079365	0.0031826	0.5373	0.25055	--	--	--	PRR5L	--	--
hypothalamus-VS-cerebellum	chr15	74753081	74753148	0.207346	5	0.0079365	0.045104	0.44199	0.23465	--	--	--	HSD17B12	--	--
hypothalamus-VS-cerebellum	chr15	75010570	75010627	0.192415	7	0.011072	0.036399	0.50748	0.31507	--	--	--	--	--	--
hypothalamus-VS-cerebellum	chr15	75106512	75106720	0.237672	13	1.923e-07	7.5285e-05	0.39843	0.16076	--	--	--	EXT2	--	--
hypothalamus-VS-cerebellum	chr15	75152144	75152197	0.223258	5	0.015873	0.042512	0.43179	0.20853	--	--	--	EXT2	--	--
hypothalamus-VS-cerebellum	chr15	75549450	75549544	0.132522	8	0.014763	0.0030677	0.40619	0.27367	--	--	--	CD82	--	--
hypothalamus-VS-cerebellum	chr15	75859277	75859384	0.218651	7	0.00058275	0.0052643	0.52504	0.30639	--	--	TP53I11	--	TP53I11	--
hypothalamus-VS-cerebellum	chr15	75916387	75916797	0.190188	15	0.0030201	0.00698	0.38829	0.1981	--	--	--	--	--	--
hypothalamus-VS-cerebellum	chr15	76131705	76132063	-0.118751	5	0.0079365	0.00083978	0.11802	0.23677	--	--	--	--	--	--
hypothalamus-VS-cerebellum	chr15	76139282	76139376	0.281731	6	0.0021645	0.0018197	0.44291	0.16118	--	--	--	--	--	--
hypothalamus-VS-cerebellum	chr15	76146484	76146743	0.196403	9	0.0056355	0.035273	0.32946	0.13306	--	--	--	--	--	--
hypothalamus-VS-cerebellum	chr15	76154223	76154273	0.156009	5	0.0079365	0.0038594	0.32207	0.16606	--	--	--	--	--	--
hypothalamus-VS-cerebellum	chr15	76575000	76575105	0.143001	8	0.0006216	0.033807	0.28251	0.13951	--	--	CHST1	--	--	--
hypothalamus-VS-cerebellum	chr15	76779396	76779781	0.281089	7	0.0040793	0.038027	0.53242	0.25133	--	--	CRY2	CRY2	--	--
hypothalamus-VS-cerebellum	chr15	76799311	76799414	0.174685	7	0.037879	0.038808	0.46113	0.28645	--	--	--	MAPK8IP1	--	--
hypothalamus-VS-cerebellum	chr15	76810044	76810072	0.161447	5	0.031746	0.015005	0.43433	0.27289	--	--	MAPK8IP1	--	--	--
hypothalamus-VS-cerebellum	chr15	76816731	76816827	0.238954	5	0.031746	0.019587	0.52835	0.2894	--	--	--	--	--	PEX16
hypothalamus-VS-cerebellum	chr15	76819034	76819306	0.14846	8	0.020668	0.046153	0.38985	0.24139	--	--	PEX16	PEX16	--	--
hypothalamus-VS-cerebellum	chr15	77237074	77237416	0.244126	12	7.396e-07	3.295e-06	0.38315	0.13902	--	--	--	DGKZ	--	--
hypothalamus-VS-cerebellum	chr15	77244753	77245441	0.162114	26	5.189e-06	0.0019169	0.389	0.22689	--	--	DGKZ	DGKZ	--	--
hypothalamus-VS-cerebellum	chr15	77264975	77265065	0.186406	6	0.004329	0.042347	0.41169	0.22528	--	--	AMBRA1	--	AMBRA1	--
hypothalamus-VS-cerebellum	chr15	77267990	77268140	0.218733	6	0.025974	0.0058323	0.45729	0.23855	--	--	--	AMBRA1	--	--
hypothalamus-VS-cerebellum	chr15	77293777	77293987	0.295307	7	0.00058275	0.00014078	0.42436	0.12905	--	--	AMBRA1	--	--	--
hypothalamus-VS-cerebellum	chr15	77385508	77385615	0.263079	8	0.0018648	0.0020316	0.46815	0.20507	--	--	--	AMBRA1	--	--
hypothalamus-VS-cerebellum	chr15	77681051	77681320	0.32646	8	0.0001554	0.002348	0.48707	0.16061	--	--	LRP4	--	--	--
hypothalamus-VS-cerebellum	chr15	77694066	77694140	0.325975	8	0.0001554	0.0084186	0.51445	0.18848	--	--	LRP4	--	--	--
hypothalamus-VS-cerebellum	chr15	78256525	78257329	0.248855	13	0.0019137	0.018318	0.50779	0.25894	--	--	ARFGAP2	ARFGAP2	--	--
hypothalamus-VS-cerebellum	chr15	78357925	78358212	0.300284	8	0.0010878	0.00070078	0.44687	0.14658	--	--	--	MADD	--	MIR2318
hypothalamus-VS-cerebellum	chr15	78377434	78377507	0.219965	9	4.1135e-05	0.00031301	0.3511	0.13113	--	--	MADD	--	--	--
hypothalamus-VS-cerebellum	chr15	78380202	78380568	0.140611	7	0.026224	0.046005	0.27353	0.13292	--	--	--	MADD	--	--
hypothalamus-VS-cerebellum	chr15	78449265	78449312	0.342417	5	0.0079365	0.001936	0.57238	0.22997	--	--	SLC39A13	--	--	--
hypothalamus-VS-cerebellum	chr15	78490045	78490078	0.260025	5	0.0079365	0.023269	0.57114	0.31111	--	--	--	--	--	CELF1
hypothalamus-VS-cerebellum	chr15	78523615	78523699	0.399807	6	0.0021645	0.0014043	0.61544	0.21563	--	CELF1	--	CELF1	--	--
hypothalamus-VS-cerebellum	chr15	78591927	78592039	0.288535	5	0.0079365	0.015116	0.45162	0.16308	--	--	--	--	--	FAM180B
hypothalamus-VS-cerebellum	chr15	78931308	78931428	0.456251	7	0.00058275	0.00065363	0.7378	0.28155	--	--	--	--	--	--
hypothalamus-VS-cerebellum	chr15	78950700	78950794	0.2101	5	0.0079365	0.0012096	0.32169	0.11159	--	--	--	--	--	--
hypothalamus-VS-cerebellum	chr15	81672407	81672877	0.116175	16	0.0015462	0.0032468	0.30336	0.18719	--	--	--	--	--	--
hypothalamus-VS-cerebellum	chr15	81794705	81794853	0.160976	10	2.165e-05	0.0011331	0.33308	0.17211	MIR12046	--	--	--	--	--
hypothalamus-VS-cerebellum	chr15	81795167	81795592	0.278099	5	0.0079365	0.011137	0.49799	0.21989	--	--	--	--	--	--
hypothalamus-VS-cerebellum	chr15	81796010	81796430	0.253286	13	1.8653e-05	0.00049311	0.37744	0.12415	--	--	--	--	--	--
hypothalamus-VS-cerebellum	chr15	81802106	81802169	0.225729	5	0.0079365	0.0037585	0.44333	0.2176	--	--	--	--	--	--
hypothalamus-VS-cerebellum	chr15	82030125	82030665	0.142964	7	0.026224	0.04307	0.34271	0.19975	--	--	--	--	--	--
hypothalamus-VS-cerebellum	chr15	82033405	82034003	-0.116427	15	0.00033341	0.00043205	0.14605	0.26248	--	--	--	--	--	--
hypothalamus-VS-cerebellum	chr15	82131715	82132145	0.196545	7	0.011072	0.014234	0.37001	0.17346	--	--	UBE2L6	UBE2L6	--	--
hypothalamus-VS-cerebellum	chr15	82197467	82197811	0.12518	7	0.037879	0.047099	0.38786	0.26268	MIR130A	--	MIR130A	--	--	--
hypothalamus-VS-cerebellum	chr15	82277064	82277133	0.250912	6	0.041126	0.02084	0.46374	0.21283	--	--	--	--	--	--
hypothalamus-VS-cerebellum	chr15	82348996	82349143	0.188852	5	0.0079365	0.010343	0.34318	0.15433	--	--	ZDHHC5	ZDHHC5	--	--
hypothalamus-VS-cerebellum	chr15	82352250	82352829	0.175532	36	4.5671e-06	0.00031475	0.43257	0.25704	--	--	ZDHHC5	--	--	--
hypothalamus-VS-cerebellum	chr15	84114554	84114751	0.234805	5	0.031746	0.039018	0.41728	0.18247	--	--	OSBP	--	OSBP	--
hypothalamus-VS-cerebellum	chr15	84115145	84115275	0.200943	5	0.031746	0.046304	0.44599	0.24504	--	--	OSBP	--	--	--
hypothalamus-VS-cerebellum	chr15	84128324	84128511	0.317634	5	0.015873	0.010283	0.55424	0.2366	--	--	--	OSBP	--	--
hypothalamus-VS-cerebellum	chr15	84328969	84329410	0.171543	7	0.026224	0.018478	0.29101	0.11947	--	--	--	STX3	--	--
hypothalamus-VS-cerebellum	chr15	84345416	84345523	0.245278	5	0.0079365	0.0015908	0.56983	0.32455	--	--	--	STX3	STX3	MRPL16
hypothalamus-VS-cerebellum	chr15	84873502	84873702	0.213742	5	0.0079365	0.048506	0.38395	0.17021	--	--	--	ACAD8	--	--
hypothalamus-VS-cerebellum	chr15	84900147	84900211	0.151886	5	0.0079365	0.00096236	0.39413	0.24225	--	--	--	--	--	--
hypothalamus-VS-cerebellum	chr15	84933965	84934457	0.160573	20	1.0377e-05	0.00052674	0.34933	0.18875	--	--	--	--	--	--
hypothalamus-VS-cerebellum	chr15	84977255	84977368	0.270948	7	0.00058275	0.00018189	0.37769	0.10674	--	--	--	--	--	--
hypothalamus-VS-cerebellum	chr15	85007680	85007806	0.134031	5	0.015873	0.037807	0.26854	0.13451	--	--	--	--	--	--
hypothalamus-VS-cerebellum	chr15	85011257	85011357	0.231256	5	0.0079365	0.010252	0.44515	0.2139	--	--	--	--	--	--
hypothalamus-VS-cerebellum	chr15	85014556	85014663	0.283802	5	0.0079365	0.0057444	0.47126	0.18746	--	--	--	--	--	B3GAT1
hypothalamus-VS-cerebellum	chr15	85018832	85018939	0.275072	5	0.0079365	0.004504	0.46087	0.1858	--	--	B3GAT1	--	--	--
hypothalamus-VS-cerebellum	chr15	85020762	85021198	0.187572	14	0.005066	0.0079788	0.45231	0.26474	--	--	--	B3GAT1	--	--
hypothalamus-VS-cerebellum	chr15	85023212	85023530	0.29657	5	0.0079365	0.00091156	0.52739	0.23082	B3GAT1	--	B3GAT1	--	--	--
hypothalamus-VS-cerebellum	chr15	85030260	85030317	0.232486	5	0.0079365	0.021006	0.56787	0.33539	--	--	--	--	--	--
hypothalamus-VS-cerebellum	chr15	85038696	85039173	0.227861	5	0.015873	0.014504	0.47586	0.248	--	--	--	--	--	--
hypothalamus-VS-cerebellum	chr15	85040733	85040876	0.168356	10	0.00048713	0.027152	0.4019	0.23355	--	--	--	--	--	--
hypothalamus-VS-cerebellum	chr15	85044948	85045534	0.190329	12	0.00065603	0.038923	0.4167	0.22637	--	--	--	--	--	--
hypothalamus-VS-cerebellum	chr15	85057476	85057706	0.220333	5	0.015873	0.01938	0.47061	0.25027	--	--	--	--	--	--
hypothalamus-VS-cerebellum	chr15	85077794	85077938	0.190851	5	0.015873	0.020554	0.44091	0.25006	--	--	--	--	--	--
hypothalamus-VS-cerebellum	chr15	85078781	85078927	0.206338	7	0.00058275	0.0089148	0.45229	0.24595	--	--	--	--	--	--
hypothalamus-VS-cerebellum	chr15	85086501	85086899	0.339825	6	0.0021645	0.00058104	0.60387	0.26405	--	--	--	--	--	--
hypothalamus-VS-cerebellum	chr15	85113003	85113064	0.231532	5	0.0079365	0.013291	0.45061	0.21907	--	--	--	--	--	--
hypothalamus-VS-cerebellum	chr16	1046539	1046695	0.144121	7	0.0040793	0.018802	0.32532	0.18119	--	--	--	--	--	--
hypothalamus-VS-cerebellum	chr16	1728243	1728277	0.131607	5	0.0079365	0.021825	0.29683	0.16523	--	--	--	--	--	--
hypothalamus-VS-cerebellum	chr16	1830609	1830674	-0.140485	6	0.0021645	0.0011344	0.13177	0.27226	--	--	--	--	--	--
hypothalamus-VS-cerebellum	chr16	1983140	1983252	0.257488	5	0.0079365	0.0039444	0.38447	0.12698	--	--	--	--	--	--
hypothalamus-VS-cerebellum	chr16	2026895	2026972	0.187764	5	0.031746	0.011894	0.48026	0.2925	--	--	--	--	--	--
hypothalamus-VS-cerebellum	chr16	2185671	2185899	0.226977	5	0.0079365	0.042913	0.44614	0.21916	--	--	--	LRRN2	--	--
hypothalamus-VS-cerebellum	chr16	2185954	2186006	-0.183412	5	0.0079365	0.01261	0.20636	0.38977	--	--	--	LRRN2	--	--
hypothalamus-VS-cerebellum	chr16	2214868	2215021	0.228216	12	4.9553e-05	0.0010419	0.47701	0.24879	--	--	--	--	--	--
hypothalamus-VS-cerebellum	chr16	2482918	2483245	0.14797	6	0.004329	0.042024	0.38248	0.23451	--	--	--	--	--	--
hypothalamus-VS-cerebellum	chr16	2584810	2585383	0.114435	19	0.013627	0.011067	0.36688	0.25244	--	--	--	--	--	--
hypothalamus-VS-cerebellum	chr16	2586596	2586693	0.279391	5	0.0079365	0.00059498	0.4544	0.17501	--	--	--	--	--	--
hypothalamus-VS-cerebellum	chr16	2604435	2604839	0.241921	9	0.00078157	0.0065294	0.45429	0.21236	--	--	--	--	--	--
hypothalamus-VS-cerebellum	chr16	2634181	2634403	0.116472	6	0.041126	0.0048623	0.27076	0.15429	--	--	--	--	--	--
hypothalamus-VS-cerebellum	chr16	2642959	2643504	0.1068	22	0.01202	0.039893	0.37314	0.26634	--	--	--	--	--	--
hypothalamus-VS-cerebellum	chr16	2649463	2649516	0.159947	5	0.0079365	0.038287	0.314	0.15406	--	--	--	--	--	--
hypothalamus-VS-cerebellum	chr16	2681712	2681985	0.201385	9	0.00016454	0.00045935	0.40953	0.20814	--	--	--	--	--	--
hypothalamus-VS-cerebellum	chr16	2684469	2684880	0.239109	11	0.0018599	0.0054342	0.47731	0.2382	--	--	--	--	--	--
hypothalamus-VS-cerebellum	chr16	2848817	2848977	0.161201	7	0.0011655	0.0078997	0.33462	0.17342	--	--	TMCC2	--	--	--
hypothalamus-VS-cerebellum	chr16	2879401	2879463	0.19229	5	0.0079365	0.02352	0.30929	0.117	--	--	--	--	--	--
hypothalamus-VS-cerebellum	chr16	2902115	2902209	0.181032	5	0.015873	0.04158	0.35718	0.17615	--	--	NUAK2	--	--	--
hypothalamus-VS-cerebellum	chr16	3103599	3103764	0.217585	5	0.015873	0.03422	0.42161	0.20402	--	--	CDK18	CDK18	--	--
hypothalamus-VS-cerebellum	chr16	3174351	3174453	0.294066	8	0.0001554	0.00021201	0.51886	0.2248	--	--	--	--	--	--
hypothalamus-VS-cerebellum	chr16	3247294	3247454	0.137374	13	0.0015499	0.032379	0.3303	0.19293	--	--	--	--	--	--
hypothalamus-VS-cerebellum	chr16	3301250	3301326	0.143796	5	0.031746	0.037349	0.39627	0.25247	--	--	--	--	--	NUCKS1
hypothalamus-VS-cerebellum	chr16	3384613	3384689	0.315217	5	0.0079365	0.0034671	0.46787	0.15266	--	--	SLC41A1	--	--	--
hypothalamus-VS-cerebellum	chr16	3610347	3610576	0.31609	8	0.0006216	0.0071959	0.48543	0.16934	--	--	--	--	--	--
hypothalamus-VS-cerebellum	chr16	3917252	3917306	0.30562	5	0.0079365	0.00073777	0.50078	0.19515	--	--	--	SRGAP2	--	--
hypothalamus-VS-cerebellum	chr16	4094107	4094345	0.128012	7	0.006993	0.0059516	0.3583	0.23029	--	--	--	SRGAP2	--	--
hypothalamus-VS-cerebellum	chr16	4098739	4098813	0.201697	5	0.0079365	0.00088799	0.35161	0.14991	--	--	SRGAP2	--	--	--
hypothalamus-VS-cerebellum	chr16	4134396	4134732	0.241556	7	0.00058275	0.0057443	0.41808	0.17652	--	--	IKBKE	--	IKBKE	--
hypothalamus-VS-cerebellum	chr16	4306718	4306980	0.109522	9	0.0012341	0.018177	0.32286	0.21334	--	--	--	--	--	--
hypothalamus-VS-cerebellum	chr16	4332607	4332671	0.269844	5	0.0079365	0.013498	0.5419	0.27205	--	--	--	--	--	--
hypothalamus-VS-cerebellum	chr16	4335615	4335778	0.165045	12	0.0001028	0.0024145	0.38094	0.21589	--	--	--	--	--	--
hypothalamus-VS-cerebellum	chr16	4349477	4349631	0.165694	8	0.004662	0.014587	0.44746	0.28176	--	--	--	--	--	--
hypothalamus-VS-cerebellum	chr16	27547801	27547842	-0.136163	5	0.0079365	0.016244	0.12399	0.26015	--	--	CCDC185	--	--	--
hypothalamus-VS-cerebellum	chr16	27862686	27862838	0.224759	9	4.1135e-05	0.0060932	0.38225	0.15749	--	--	--	--	--	--
hypothalamus-VS-cerebellum	chr16	29586447	29586606	0.175608	5	0.015873	0.018408	0.36206	0.18645	--	EPHX1	--	EPHX1	--	--
hypothalamus-VS-cerebellum	chr16	30142254	30142540	0.275424	5	0.0079365	0.00053215	0.48127	0.20584	--	--	--	PARP1	--	--
hypothalamus-VS-cerebellum	chr16	30675276	30675439	0.262795	5	0.015873	0.02109	0.5786	0.31581	--	COQ8A	--	COQ8A	--	--
hypothalamus-VS-cerebellum	chr16	31181719	31181867	0.366378	5	0.0079365	0.012799	0.60783	0.24145	--	--	--	AHCTF1	--	--
hypothalamus-VS-cerebellum	chr16	43032807	43032880	0.116834	8	0.014763	0.039709	0.3069	0.19007	--	--	DISP3	--	--	--
hypothalamus-VS-cerebellum	chr16	43463591	43463700	0.267906	7	0.00058275	0.00061283	0.42466	0.15675	--	--	MASP2	--	--	--
hypothalamus-VS-cerebellum	chr16	43848679	43848918	0.216629	5	0.031746	0.035755	0.42739	0.21076	--	--	--	PEX14	--	--
hypothalamus-VS-cerebellum	chr16	44775427	44775491	0.220094	5	0.0079365	0.036341	0.35134	0.13125	--	--	--	--	--	--
hypothalamus-VS-cerebellum	chr16	44787036	44787286	0.209752	16	0.00025636	0.00039983	0.44627	0.23652	--	--	TMEM201	--	--	--
hypothalamus-VS-cerebellum	chr16	45876514	45876588	0.195258	5	0.015873	0.035457	0.36099	0.16573	--	--	--	--	--	--
hypothalamus-VS-cerebellum	chr16	45876602	45876710	0.113133	5	0.0079365	0.0020898	0.23223	0.1191	--	--	--	--	--	--
hypothalamus-VS-cerebellum	chr16	46563682	46564037	0.227276	5	0.0079365	0.0038876	0.39987	0.17259	--	--	--	--	--	--
hypothalamus-VS-cerebellum	chr16	47381548	47381605	0.144864	5	0.031746	0.025116	0.40571	0.26085	--	--	--	--	--	--
hypothalamus-VS-cerebellum	chr16	47443681	47443869	0.170016	8	0.049883	0.019394	0.35579	0.18577	--	--	--	--	--	--
hypothalamus-VS-cerebellum	chr16	47744182	47744427	0.246553	5	0.031746	0.016505	0.31539	0.068836	--	--	--	--	--	--
hypothalamus-VS-cerebellum	chr16	47756659	47756752	0.141111	5	0.0079365	0.014364	0.34318	0.20207	--	--	--	--	--	TNFRSF25
hypothalamus-VS-cerebellum	chr16	47929647	47929749	0.229305	5	0.015873	0.011748	0.44706	0.21775	--	--	--	ACOT7	--	--
hypothalamus-VS-cerebellum	chr16	47978816	47979098	0.179419	6	0.025974	0.013687	0.30656	0.12715	--	--	--	RNF207	--	--
hypothalamus-VS-cerebellum	chr16	48114584	48114753	0.211772	7	0.00058275	0.00014649	0.42718	0.21541	--	--	--	KCNAB2	--	--
hypothalamus-VS-cerebellum	chr16	48299599	48299817	0.123543	5	0.0079365	0.009958	0.30347	0.17993	--	--	--	--	--	--
hypothalamus-VS-cerebellum	chr16	49303213	49303613	0.179203	7	0.002331	0.022977	0.42087	0.24167	--	--	--	--	--	--
hypothalamus-VS-cerebellum	chr16	49422341	49422403	0.262537	6	0.0021645	0.00037305	0.41625	0.15372	--	--	--	--	--	--
hypothalamus-VS-cerebellum	chr16	49444207	49444335	0.119444	5	0.031746	0.035564	0.32009	0.20065	--	--	--	--	--	--
hypothalamus-VS-cerebellum	chr16	49454979	49455050	0.250823	5	0.0079365	0.0046078	0.49808	0.24726	--	--	--	--	--	--
hypothalamus-VS-cerebellum	chr16	49455521	49455720	0.102098	10	0.0089307	0.012825	0.29199	0.18989	--	--	--	--	--	--
hypothalamus-VS-cerebellum	chr16	49476535	49476894	0.144651	9	0.0039901	0.014524	0.44546	0.30081	--	--	--	--	--	--
hypothalamus-VS-cerebellum	chr16	49489568	49489685	0.249498	8	0.0001554	0.0030586	0.46764	0.21815	--	--	--	--	--	--
hypothalamus-VS-cerebellum	chr16	49499370	49499610	0.103749	5	0.031746	0.049981	0.33554	0.23179	--	--	--	--	--	--
hypothalamus-VS-cerebellum	chr16	49505410	49505468	0.188996	5	0.031746	0.035637	0.43185	0.24285	--	--	--	--	--	--
hypothalamus-VS-cerebellum	chr16	49513649	49513889	0.17023	7	0.011072	0.041512	0.41983	0.2496	--	--	--	--	--	--
hypothalamus-VS-cerebellum	chr16	49529745	49530006	-0.107589	5	0.0079365	0.010319	0.15231	0.2599	--	--	--	--	--	--
hypothalamus-VS-cerebellum	chr16	49547388	49547801	0.147753	14	5.2683e-05	0.001005	0.35809	0.21034	--	--	--	--	--	--
hypothalamus-VS-cerebellum	chr16	49566632	49566793	0.143518	7	0.0040793	0.001722	0.33682	0.1933	--	--	--	--	--	--
hypothalamus-VS-cerebellum	chr16	49582216	49582564	0.167858	5	0.0079365	0.0074892	0.32	0.15214	--	--	--	--	--	--
hypothalamus-VS-cerebellum	chr16	49600853	49600936	0.149506	9	0.014192	0.014515	0.33397	0.18446	--	--	--	--	--	--
hypothalamus-VS-cerebellum	chr16	49607516	49607591	0.305981	5	0.0079365	0.012107	0.49647	0.19048	--	--	--	--	--	--
hypothalamus-VS-cerebellum	chr16	49612428	49612580	0.255794	5	0.015873	0.035967	0.5089	0.2531	--	--	--	--	--	--
hypothalamus-VS-cerebellum	chr16	49613184	49613264	0.225377	6	0.008658	0.04244	0.49646	0.27108	--	--	--	--	--	--
hypothalamus-VS-cerebellum	chr16	49623201	49623299	0.222603	5	0.015873	0.040792	0.50879	0.28619	--	--	--	--	--	LMOD1
hypothalamus-VS-cerebellum	chr16	49624018	49624387	0.155826	23	0.00013804	0.0019209	0.41296	0.25713	--	--	--	--	--	LMOD1
hypothalamus-VS-cerebellum	chr16	49641421	49641477	0.193328	5	0.0079365	0.010641	0.46644	0.27312	--	--	--	LMOD1	--	--
hypothalamus-VS-cerebellum	chr16	50498418	50498475	0.142552	5	0.0079365	0.010665	0.32083	0.17828	--	--	--	--	--	--
hypothalamus-VS-cerebellum	chr16	50533007	50533075	0.195361	5	0.015873	0.039166	0.46068	0.26532	--	--	--	--	--	--
hypothalamus-VS-cerebellum	chr16	50537283	50537405	0.228073	5	0.015873	0.019012	0.38116	0.15308	--	--	--	--	--	--
hypothalamus-VS-cerebellum	chr16	50798203	50799237	0.194738	21	0.00010167	0.0015224	0.40025	0.20551	--	--	--	--	--	--
hypothalamus-VS-cerebellum	chr16	50801375	50801675	0.145533	11	0.0066342	0.012512	0.32606	0.18053	--	--	--	--	--	--
hypothalamus-VS-cerebellum	chr16	50801980	50802232	0.269314	7	0.011072	0.0098997	0.49234	0.22302	--	--	--	--	--	--
hypothalamus-VS-cerebellum	chr16	50811697	50811847	0.170691	8	0.0001554	0.0064306	0.2889	0.11821	--	--	ARHGEF16	--	--	--
hypothalamus-VS-cerebellum	chr16	50820780	50821272	0.250699	9	0.0018511	0.0011866	0.48864	0.23794	--	--	ARHGEF16	ARHGEF16	--	--
hypothalamus-VS-cerebellum	chr16	50826611	50826704	0.311371	5	0.0079365	0.011454	0.47799	0.16662	--	--	--	--	--	--
hypothalamus-VS-cerebellum	chr16	51180784	51180864	-0.151773	5	0.0079365	0.021158	0.15193	0.3037	--	--	--	--	--	--
hypothalamus-VS-cerebellum	chr16	51508822	51509135	0.154805	8	0.028127	0.034014	0.41013	0.25532	--	--	--	--	--	--
hypothalamus-VS-cerebellum	chr16	51609881	51610376	0.232376	19	1.4548e-05	0.00015489	0.43089	0.19851	--	--	--	--	--	--
hypothalamus-VS-cerebellum	chr16	51610841	51611121	0.21982	6	0.0021645	0.0040347	0.3612	0.14138	--	--	--	--	--	--
hypothalamus-VS-cerebellum	chr16	51629110	51629231	0.104599	5	0.0079365	0.0025269	0.23034	0.12574	--	--	--	--	--	--
hypothalamus-VS-cerebellum	chr16	52346535	52346610	0.183506	5	0.0079365	0.0047637	0.32453	0.14102	--	--	ATAD3A	--	--	--
hypothalamus-VS-cerebellum	chr16	52361693	52361868	0.118838	5	0.031746	0.038923	0.34673	0.2279	--	--	--	VWA1	--	--
hypothalamus-VS-cerebellum	chr16	52525375	52525618	0.136601	6	0.015152	0.0052958	0.36592	0.22932	--	--	--	--	--	--
hypothalamus-VS-cerebellum	chr16	52526009	52526579	0.132884	8	0.0029526	0.0020806	0.30412	0.17124	--	--	--	--	--	--
hypothalamus-VS-cerebellum	chr16	52569466	52569902	0.210108	18	1.0937e-05	0.0001673	0.39394	0.18383	--	--	--	--	--	--
hypothalamus-VS-cerebellum	chr16	52602309	52602397	0.206807	10	1.0825e-05	0.00039036	0.50001	0.2932	--	--	ACAP3	--	--	--
hypothalamus-VS-cerebellum	chr16	52671481	52671529	0.209208	5	0.031746	0.046721	0.47513	0.26592	--	--	--	--	--	--
hypothalamus-VS-cerebellum	chr16	52684443	52684564	0.185519	12	0.00014422	0.01039	0.34191	0.15639	--	--	--	--	--	--
hypothalamus-VS-cerebellum	chr16	52878310	52878373	0.154934	9	0.0027561	0.0023063	0.42131	0.26637	--	--	--	--	--	--
hypothalamus-VS-cerebellum	chr16	52886153	52886363	0.202224	5	0.0079365	0.03365	0.43182	0.2296	--	--	--	--	--	--
hypothalamus-VS-cerebellum	chr16	54013635	54013731	0.21954	6	0.004329	0.01702	0.40515	0.18561	--	--	--	--	--	--
hypothalamus-VS-cerebellum	chr16	55099107	55099228	0.219055	5	0.015873	0.040886	0.40924	0.19018	--	--	--	--	--	--
hypothalamus-VS-cerebellum	chr16	55236967	55237117	0.167631	7	0.00058275	0.0007376	0.41029	0.24266	--	--	--	--	--	MIR10180
hypothalamus-VS-cerebellum	chr16	55322661	55322763	0.239956	5	0.0079365	0.0041406	0.40023	0.16028	--	--	--	--	--	--
hypothalamus-VS-cerebellum	chr16	55354914	55355494	0.237714	7	0.006993	0.015463	0.54646	0.30874	--	--	--	--	--	--
hypothalamus-VS-cerebellum	chr16	55478295	55478347	0.143836	5	0.0079365	0.001658	0.33171	0.18788	--	--	--	--	--	--
hypothalamus-VS-cerebellum	chr16	56697460	56697667	0.207766	9	0.00078157	0.014835	0.43259	0.22482	--	--	ZBTB37	--	--	--
hypothalamus-VS-cerebellum	chr16	59749901	59749986	0.255788	6	0.025974	0.012976	0.44126	0.18547	--	--	--	--	--	--
hypothalamus-VS-cerebellum	chr16	60760227	60760262	0.12255	5	0.015873	0.01377	0.28315	0.1606	--	--	SEC16B	--	--	--
hypothalamus-VS-cerebellum	chr16	61326426	61326630	0.158961	5	0.015873	0.043141	0.4515	0.29254	--	--	--	--	--	--
hypothalamus-VS-cerebellum	chr16	62822782	62822974	0.16827	5	0.0079365	0.0031476	0.39447	0.2262	--	--	--	QSOX1	--	--
hypothalamus-VS-cerebellum	chr16	63526249	63526394	0.126688	6	0.025974	0.045873	0.38974	0.26305	--	--	--	--	--	--
hypothalamus-VS-cerebellum	chr16	63551643	63551740	0.104707	5	0.0079365	0.013612	0.34523	0.24052	--	--	--	--	--	--
hypothalamus-VS-cerebellum	chr16	63552063	63552460	0.162143	12	0.00027439	0.0023964	0.35683	0.19469	--	--	--	--	--	--
hypothalamus-VS-cerebellum	chr16	63562346	63562613	0.158116	6	0.025974	0.043256	0.35402	0.19591	--	--	--	--	--	--
hypothalamus-VS-cerebellum	chr16	70725291	70725740	0.132965	6	0.041126	0.0042249	0.26143	0.12847	--	--	PTPN14	--	--	--
hypothalamus-VS-cerebellum	chr16	70816915	70816988	0.187246	7	0.0040793	0.0034614	0.55064	0.3634	--	--	--	RNPEP	--	--
hypothalamus-VS-cerebellum	chr16	70835544	70835609	0.137471	7	0.017483	0.00048026	0.34541	0.20794	--	--	--	--	--	--
hypothalamus-VS-cerebellum	chr16	70863679	70864085	0.11884	13	0.011975	0.032838	0.36696	0.24812	--	--	--	--	--	--
hypothalamus-VS-cerebellum	chr16	70874286	70874342	0.183464	6	0.025974	0.021162	0.44505	0.26158	--	--	--	--	--	--
hypothalamus-VS-cerebellum	chr16	70894657	70894719	0.135034	7	0.002331	0.017317	0.27526	0.14023	--	--	--	--	--	--
hypothalamus-VS-cerebellum	chr16	70896353	70896411	0.158509	6	0.015152	0.046594	0.42904	0.27053	--	--	--	--	--	--
hypothalamus-VS-cerebellum	chr16	70912554	70912699	0.25552	8	0.0003108	0.002672	0.38215	0.12663	--	--	--	--	--	--
hypothalamus-VS-cerebellum	chr16	70921343	70921479	0.127098	5	0.015873	0.043182	0.28495	0.15786	--	--	--	--	--	--
hypothalamus-VS-cerebellum	chr16	70922191	70922563	0.212876	15	0.0001475	0.00092186	0.41891	0.20603	--	--	--	--	--	--
hypothalamus-VS-cerebellum	chr16	70922892	70923583	0.180127	20	1.3303e-05	0.00097629	0.31837	0.13824	--	--	--	--	--	--
hypothalamus-VS-cerebellum	chr16	70924913	70924973	0.134251	5	0.0079365	0.0027101	0.27679	0.14254	--	--	--	--	--	--
hypothalamus-VS-cerebellum	chr16	70925320	70925444	0.193271	10	7.5776e-05	0.0027292	0.40329	0.21002	--	--	--	--	--	--
hypothalamus-VS-cerebellum	chr16	70928638	70928807	0.187834	7	0.0011655	0.018943	0.38667	0.19884	--	--	--	--	--	--
hypothalamus-VS-cerebellum	chr16	70930372	70930484	0.103823	5	0.0079365	0.0027937	0.23267	0.12885	--	--	--	--	--	--
hypothalamus-VS-cerebellum	chr16	70937010	70937063	0.235014	5	0.0079365	0.0023521	0.48463	0.24962	--	--	--	--	--	--
hypothalamus-VS-cerebellum	chr16	70941167	70941226	0.210711	7	0.006993	0.014641	0.48297	0.27226	--	--	--	--	--	--
hypothalamus-VS-cerebellum	chr16	70941959	70942287	0.213277	13	0.00022768	0.0096564	0.48235	0.26908	--	--	--	--	--	--
hypothalamus-VS-cerebellum	chr16	70945171	70945260	0.368784	7	0.0011655	0.0050527	0.61712	0.24834	--	--	--	--	--	--
hypothalamus-VS-cerebellum	chr16	70950276	70950343	0.149924	9	0.0077746	0.013914	0.35982	0.2099	--	--	--	--	--	--
hypothalamus-VS-cerebellum	chr16	70959032	70959195	0.220144	8	0.0010878	0.0082999	0.36709	0.14694	--	--	--	--	--	--
hypothalamus-VS-cerebellum	chr16	70977117	70977324	0.1527	11	0.0052365	0.0054857	0.42518	0.27248	--	--	--	--	--	--
hypothalamus-VS-cerebellum	chr16	70981312	70981649	0.25914	7	0.00058275	0.00052842	0.46803	0.20889	--	--	--	--	--	--
hypothalamus-VS-cerebellum	chr16	70987970	70988388	0.259233	8	0.006993	0.0023787	0.45713	0.1979	--	--	--	--	--	--
hypothalamus-VS-cerebellum	chr16	70997017	70997210	0.300373	8	0.0001554	0.00043087	0.4388	0.13843	--	--	--	--	--	--
hypothalamus-VS-cerebellum	chr16	71001983	71002052	0.247824	7	0.00058275	0.00069026	0.42402	0.1762	--	--	--	--	--	--
hypothalamus-VS-cerebellum	chr16	71002482	71003044	0.129933	14	0.0067098	0.01503	0.33996	0.21002	--	--	--	--	--	--
hypothalamus-VS-cerebellum	chr16	71003759	71003876	0.190019	5	0.0079365	0.021616	0.33704	0.14702	--	--	--	--	--	--
hypothalamus-VS-cerebellum	chr16	71005885	71006309	0.189672	7	0.0011655	0.0065399	0.37316	0.18349	--	--	--	--	--	--
hypothalamus-VS-cerebellum	chr16	71009832	71010000	0.312552	7	0.00058275	0.0019462	0.48202	0.16947	--	--	--	--	--	--
hypothalamus-VS-cerebellum	chr16	71014107	71014158	0.204332	5	0.031746	0.035786	0.32265	0.11832	--	--	--	--	--	--
hypothalamus-VS-cerebellum	chr16	71015304	71015437	0.181154	5	0.0079365	0.016091	0.27032	0.089164	--	--	--	--	--	--
hypothalamus-VS-cerebellum	chr16	71015663	71016204	0.241529	6	0.041126	0.0066093	0.34812	0.10659	--	--	--	--	--	--
hypothalamus-VS-cerebellum	chr16	71017441	71017664	0.203606	9	0.00078157	0.0058503	0.43345	0.22984	--	--	--	--	--	UBE2T
hypothalamus-VS-cerebellum	chr16	71018679	71018924	0.16746	17	0.00027929	0.00037241	0.32455	0.15709	--	--	--	--	--	UBE2T
hypothalamus-VS-cerebellum	chr16	71031028	71031123	0.404742	5	0.0079365	0.0029775	0.61763	0.21289	--	--	--	--	--	--
hypothalamus-VS-cerebellum	chr16	71042051	71042176	0.201708	5	0.0079365	0.013586	0.51561	0.3139	--	--	--	--	--	--
hypothalamus-VS-cerebellum	chr16	71048867	71048998	0.328465	10	1.0825e-05	0.00042628	0.56491	0.23645	--	--	--	--	--	--
hypothalamus-VS-cerebellum	chr16	71052871	71052940	0.1505	6	0.015152	0.0099927	0.39123	0.24073	--	--	--	--	--	--
hypothalamus-VS-cerebellum	chr16	71061269	71061522	0.242958	9	0.0018511	0.019342	0.51084	0.26788	--	--	--	--	--	--
hypothalamus-VS-cerebellum	chr16	71068094	71068275	0.189455	9	0.00078157	0.0073176	0.43414	0.24468	--	--	--	--	--	--
hypothalamus-VS-cerebellum	chr16	71078937	71078979	0.258645	6	0.0021645	0.0012642	0.43841	0.17976	--	--	--	--	--	--
hypothalamus-VS-cerebellum	chr16	71085493	71086092	0.29419	12	0.0001028	0.00017621	0.4827	0.18851	--	--	--	--	--	--
hypothalamus-VS-cerebellum	chr16	71088892	71089195	0.25103	5	0.015873	0.01781	0.4861	0.23507	--	--	--	--	--	--
hypothalamus-VS-cerebellum	chr16	71094853	71094882	0.347451	5	0.0079365	0.0039999	0.61042	0.26297	--	--	--	--	--	--
hypothalamus-VS-cerebellum	chr16	71103213	71103240	0.230263	5	0.0079365	0.0027122	0.48474	0.25447	--	--	--	--	--	--
hypothalamus-VS-cerebellum	chr16	71140702	71140998	0.185336	5	0.0079365	0.015767	0.37054	0.1852	--	--	--	--	--	--
hypothalamus-VS-cerebellum	chr16	71143459	71143504	0.170814	5	0.0079365	0.0025138	0.38317	0.21236	--	--	--	--	--	--
hypothalamus-VS-cerebellum	chr16	71143510	71143769	0.137551	9	0.00049362	0.013992	0.37699	0.23944	--	--	--	--	--	--
hypothalamus-VS-cerebellum	chr16	71144914	71145346	0.214211	11	0.00012758	0.012959	0.4721	0.25789	--	--	--	--	--	--
hypothalamus-VS-cerebellum	chr16	71147090	71147183	0.31582	7	0.00058275	0.00065126	0.42099	0.10517	--	--	--	--	--	--
hypothalamus-VS-cerebellum	chr16	71148394	71149293	0.183655	22	4.2121e-06	0.00021717	0.36734	0.18368	--	--	--	--	--	--
hypothalamus-VS-cerebellum	chr16	71453564	71454105	0.223621	15	0.00053336	0.0071088	0.51792	0.2943	--	--	PROX1	--	--	--
hypothalamus-VS-cerebellum	chr16	73065143	73066170	0.245619	19	1.3535e-06	0.00030748	0.42078	0.17516	--	--	PACC1	PACC1	--	--
hypothalamus-VS-cerebellum	chr16	75442666	75442706	0.247631	7	0.0011655	0.0066441	0.49133	0.2437	--	--	TRAF3IP3	--	--	--
hypothalamus-VS-cerebellum	chr16	76888260	76888322	0.121563	5	0.015873	0.0040795	0.3192	0.19764	--	--	--	--	--	--
hypothalamus-VS-cerebellum	chr16	77046072	77046221	0.104358	11	0.00039408	0.0026046	0.32581	0.22146	--	--	PLXNA2	--	--	--
hypothalamus-VS-cerebellum	chr16	77046225	77046401	0.227275	11	5.3868e-05	0.012014	0.39196	0.16468	--	--	PLXNA2	--	--	--
hypothalamus-VS-cerebellum	chr16	77053554	77053732	0.218645	9	0.0012341	0.00089908	0.41629	0.19765	--	--	--	PLXNA2	--	--
hypothalamus-VS-cerebellum	chr16	77164667	77164786	0.288025	5	0.0079365	0.0011807	0.3982	0.11017	--	--	--	PLXNA2	--	--
hypothalamus-VS-cerebellum	chr16	77224766	77224901	0.312505	6	0.0021645	0.00042823	0.47192	0.15941	--	--	--	PLXNA2	--	--
hypothalamus-VS-cerebellum	chr16	77235288	77235727	0.197282	14	6.4029e-05	9.1698e-05	0.30133	0.10405	--	--	PLXNA2	PLXNA2	--	--
hypothalamus-VS-cerebellum	chr16	77250405	77250473	0.226996	5	0.031746	0.011911	0.45562	0.22862	--	--	PLXNA2	--	PLXNA2	--
hypothalamus-VS-cerebellum	chr16	77254063	77254393	0.116744	15	0.0051139	0.039087	0.35619	0.23945	--	--	--	--	--	--
hypothalamus-VS-cerebellum	chr16	77447363	77447454	0.326565	5	0.0079365	0.00059855	0.54196	0.2154	--	--	--	--	--	--
hypothalamus-VS-cerebellum	chr16	78266911	78266993	0.145445	5	0.031746	0.015353	0.34144	0.196	--	--	CRB1	--	--	--
hypothalamus-VS-cerebellum	chr16	78430340	78430411	0.245521	5	0.0079365	0.00099081	0.35504	0.10952	--	--	--	--	--	--
hypothalamus-VS-cerebellum	chr16	78623286	78623476	0.10151	7	0.037879	0.044052	0.27307	0.17156	--	--	--	--	--	--
hypothalamus-VS-cerebellum	chr16	78661500	78661799	0.199075	6	0.015152	0.019104	0.38575	0.18668	--	--	--	--	--	--
hypothalamus-VS-cerebellum	chr16	79009695	79009752	-0.136779	6	0.015152	0.005461	0.25396	0.39074	--	--	--	--	--	--
hypothalamus-VS-cerebellum	chr16	81031447	81031489	0.200268	6	0.0021645	0.0073598	0.42472	0.22445	--	--	--	--	--	--
hypothalamus-VS-cerebellum	chr16	81032029	81032078	0.29321	5	0.0079365	0.0044646	0.50256	0.20935	--	--	--	--	--	--
hypothalamus-VS-cerebellum	chr16	81208427	81208559	0.194591	8	0.0018648	0.019881	0.46577	0.27118	--	--	DDX59	--	--	--
hypothalamus-VS-cerebellum	chr16	81318139	81318892	0.19081	28	2.3598e-05	0.00076199	0.40874	0.21793	--	--	--	--	--	--
hypothalamus-VS-cerebellum	chr16	81378437	81378572	0.139105	7	0.00058275	0.0017619	0.30181	0.1627	--	--	--	--	--	--
hypothalamus-VS-cerebellum	chr16	81446162	81446228	0.337456	7	0.00058275	0.002593	0.46462	0.12716	--	--	--	--	--	--
hypothalamus-VS-cerebellum	chr16	81540509	81540723	0.264227	6	0.0021645	0.0048418	0.55712	0.29289	--	--	--	--	--	--
hypothalamus-VS-cerebellum	chr16	81546165	81546245	0.14779	7	0.017483	0.015853	0.2926	0.14481	--	--	TMEM9	--	--	--
hypothalamus-VS-cerebellum	chr16	81566171	81566218	0.267519	5	0.0079365	0.021373	0.50103	0.23352	--	--	--	--	--	--
hypothalamus-VS-cerebellum	chr16	81623563	81623642	0.219891	5	0.015873	0.041111	0.54535	0.32546	--	--	--	--	--	--
hypothalamus-VS-cerebellum	chr16	81631027	81631202	0.175816	6	0.025974	0.0022114	0.43628	0.26046	--	--	--	--	--	--
hypothalamus-VS-cerebellum	chr16	81714496	81714691	0.191788	9	0.0027561	0.032308	0.31676	0.12497	--	--	PKP1	--	--	--
hypothalamus-VS-cerebellum	chr17	3991226	3991384	0.129697	7	0.026224	0.017267	0.31052	0.18082	--	--	--	--	--	TMEM131L
hypothalamus-VS-cerebellum	chr17	3992541	3992621	0.199446	5	0.0079365	0.0028874	0.40701	0.20757	--	--	--	TMEM131L	--	--
hypothalamus-VS-cerebellum	chr17	4026044	4026154	0.241722	5	0.0079365	0.0024353	0.37088	0.12915	--	--	TMEM131L	--	--	--
hypothalamus-VS-cerebellum	chr17	5384940	5385890	0.107825	26	2.1371e-06	1.0467e-05	0.32807	0.22025	--	--	--	--	--	--
hypothalamus-VS-cerebellum	chr17	5387341	5387488	0.111351	5	0.0079365	0.013655	0.31614	0.20479	--	--	--	--	--	--
hypothalamus-VS-cerebellum	chr17	12479951	12480003	0.197478	5	0.031746	0.0058655	0.46256	0.26508	--	--	--	--	--	--
hypothalamus-VS-cerebellum	chr17	12740864	12741051	0.230353	8	0.010412	0.034292	0.3612	0.13085	--	--	--	--	--	--
hypothalamus-VS-cerebellum	chr17	17161302	17161544	0.275292	5	0.0079365	0.0046908	0.52738	0.25209	--	--	--	--	--	--
hypothalamus-VS-cerebellum	chr17	17442511	17443024	0.110394	16	0.0011901	0.0032529	0.27705	0.16665	--	--	--	--	--	--
hypothalamus-VS-cerebellum	chr17	37138219	37138313	0.330353	5	0.0079365	0.0029601	0.71231	0.38195	--	--	--	--	--	--
hypothalamus-VS-cerebellum	chr17	41086366	41086473	0.189404	5	0.0079365	0.03429	0.22521	0.035804	--	--	--	--	--	--
hypothalamus-VS-cerebellum	chr17	45494303	45494378	0.18483	6	0.015152	0.017947	0.38149	0.19666	--	--	PGAM5	--	--	--
hypothalamus-VS-cerebellum	chr17	45620959	45621294	0.240333	7	0.011072	0.014496	0.48894	0.24861	--	--	--	--	--	--
hypothalamus-VS-cerebellum	chr17	45622883	45623152	0.218552	13	7.1727e-05	0.00045107	0.42853	0.20998	--	--	--	--	--	--
hypothalamus-VS-cerebellum	chr17	45624158	45624472	0.136389	8	0.0006216	0.0057783	0.28309	0.1467	--	--	--	--	--	--
hypothalamus-VS-cerebellum	chr17	45624505	45624665	0.117646	9	8.2271e-05	0.002674	0.2285	0.11085	--	--	--	--	--	--
hypothalamus-VS-cerebellum	chr17	45677323	45677490	0.20252	6	0.025974	0.039866	0.44442	0.2419	--	--	--	--	--	--
hypothalamus-VS-cerebellum	chr17	45679186	45679524	0.149874	10	0.0089307	0.013016	0.35044	0.20057	--	--	--	--	--	--
hypothalamus-VS-cerebellum	chr17	45679634	45679707	0.180079	5	0.0079365	0.014815	0.43038	0.2503	--	--	--	--	--	--
hypothalamus-VS-cerebellum	chr17	45938612	45938733	0.244791	5	0.0079365	0.010054	0.46996	0.22517	--	--	--	--	--	--
hypothalamus-VS-cerebellum	chr17	45939065	45939569	0.192483	7	0.00058275	0.00033934	0.37587	0.18339	--	--	--	--	--	--
hypothalamus-VS-cerebellum	chr17	46066232	46066317	0.200357	7	0.00058275	0.0022054	0.35143	0.15107	--	--	EP400	--	--	--
hypothalamus-VS-cerebellum	chr17	46074875	46074936	0.174896	5	0.0079365	0.040759	0.31544	0.14054	--	--	EP400	--	--	--
hypothalamus-VS-cerebellum	chr17	46126906	46127743	0.175597	17	6.0035e-05	0.0051256	0.39649	0.22089	--	--	EP400	--	--	--
hypothalamus-VS-cerebellum	chr17	46171505	46171571	0.307172	5	0.0079365	0.042319	0.52619	0.21902	--	--	ULK1	--	ULK1	--
hypothalamus-VS-cerebellum	chr17	46183494	46183792	0.181221	12	0.0055596	0.0051103	0.39582	0.2146	--	--	ULK1	ULK1	--	--
hypothalamus-VS-cerebellum	chr17	46237636	46237673	0.329262	7	0.0011655	0.0024173	0.54276	0.2135	--	--	--	--	--	--
hypothalamus-VS-cerebellum	chr17	46240926	46241100	0.104506	7	0.017483	0.0055739	0.39752	0.29302	--	--	--	--	--	--
hypothalamus-VS-cerebellum	chr17	47681235	47681426	0.120123	8	0.0010878	0.0023117	0.24898	0.12885	--	--	--	--	--	--
hypothalamus-VS-cerebellum	chr17	53116360	53116478	0.513283	5	0.0079365	0.0035527	0.80222	0.28894	--	--	DHX37	--	--	--
hypothalamus-VS-cerebellum	chr17	53142669	53143269	0.161624	20	3.929e-05	0.0017887	0.43323	0.2716	--	--	UBC	--	--	--
hypothalamus-VS-cerebellum	chr17	53625288	53625332	0.209195	5	0.0079365	0.014077	0.35813	0.14893	--	--	--	--	--	--
hypothalamus-VS-cerebellum	chr17	53684389	53684460	0.241065	5	0.0079365	0.0123	0.48943	0.24836	--	--	--	--	--	--
hypothalamus-VS-cerebellum	chr17	53706522	53706574	0.224678	5	0.015873	0.012402	0.45733	0.23266	--	--	--	--	--	--
hypothalamus-VS-cerebellum	chr17	53708489	53708588	0.381319	5	0.0079365	0.0050642	0.61835	0.23703	--	--	--	--	--	--
hypothalamus-VS-cerebellum	chr17	53708820	53708859	0.189318	5	0.0079365	0.012067	0.47356	0.28425	--	--	--	--	--	--
hypothalamus-VS-cerebellum	chr17	53716259	53716527	0.178573	5	0.015873	0.038867	0.51577	0.3372	--	--	RFLNA	--	--	--
hypothalamus-VS-cerebellum	chr17	54038717	54039186	0.144978	15	0.0015084	0.0071307	0.35543	0.21046	--	--	CCDC92	--	--	--
hypothalamus-VS-cerebellum	chr17	54712842	54713557	0.236048	13	8.6533e-06	0.00019831	0.46366	0.22761	--	--	--	--	--	--
hypothalamus-VS-cerebellum	chr17	54779837	54779945	0.255036	5	0.0079365	0.036918	0.52192	0.26688	--	--	PITPNM2	--	--	--
hypothalamus-VS-cerebellum	chr17	54792872	54793125	0.251347	5	0.0079365	0.0040831	0.4062	0.15486	--	--	--	PITPNM2	--	--
hypothalamus-VS-cerebellum	chr17	54827513	54827852	0.185059	8	0.0006216	0.0021059	0.36587	0.18081	--	--	ABCB9	--	--	--
hypothalamus-VS-cerebellum	chr17	54850957	54851012	0.202293	5	0.0079365	0.019039	0.41554	0.21325	--	--	ABCB9	--	--	--
hypothalamus-VS-cerebellum	chr17	54920911	54921285	0.27381	12	0.0001028	0.00044459	0.55029	0.27648	--	--	--	--	--	--
hypothalamus-VS-cerebellum	chr17	54927983	54928101	0.201697	10	0.00105	0.0064548	0.47512	0.27343	--	--	--	--	--	--
hypothalamus-VS-cerebellum	chr17	55733059	55734046	0.145618	20	0.00059176	0.015283	0.34726	0.20164	--	--	--	--	--	--
hypothalamus-VS-cerebellum	chr17	56011729	56011935	0.155226	5	0.0079365	0.00064907	0.29955	0.14433	--	--	--	--	--	--
hypothalamus-VS-cerebellum	chr17	56136563	56136684	0.273425	5	0.0079365	0.018374	0.48136	0.20793	--	--	CAMKK2	--	--	--
hypothalamus-VS-cerebellum	chr17	56164943	56165105	0.198537	10	0.00072528	0.0059463	0.46614	0.2676	--	--	--	CAMKK2	--	--
hypothalamus-VS-cerebellum	chr17	58438194	58438445	0.120238	13	0.008601	0.033871	0.46983	0.34959	--	--	--	--	--	--
hypothalamus-VS-cerebellum	chr17	60159866	60159944	0.325316	5	0.0079365	0.0063916	0.54203	0.21671	--	--	--	FBXW8	--	--
hypothalamus-VS-cerebellum	chr17	60170298	60170335	0.197549	5	0.0079365	0.014118	0.56761	0.37006	--	--	--	FBXW8	--	--
hypothalamus-VS-cerebellum	chr17	60264425	60264582	0.351694	9	4.1135e-05	0.00011442	0.68975	0.33806	--	--	--	--	--	--
hypothalamus-VS-cerebellum	chr17	61145030	61145149	0.188723	7	0.0011655	0.0058226	0.40174	0.21301	--	--	--	MED13L	--	--
hypothalamus-VS-cerebellum	chr17	62971476	62971754	0.277433	8	0.0010878	0.0024082	0.45194	0.17451	--	--	--	RBM19	--	--
hypothalamus-VS-cerebellum	chr17	62986176	62986799	0.218991	19	0.00019739	0.0064924	0.42901	0.21002	--	--	RBM19	RBM19	--	--
hypothalamus-VS-cerebellum	chr17	62989688	62989775	0.225307	5	0.0079365	0.0037225	0.47018	0.24487	--	--	--	RBM19	--	--
hypothalamus-VS-cerebellum	chr17	63001734	63001798	-0.105566	5	0.0079365	0.0037671	0.24858	0.35414	--	--	--	RBM19	--	--
hypothalamus-VS-cerebellum	chr17	63508039	63508091	0.310399	5	0.0079365	0.0044927	0.65272	0.34232	--	--	--	--	--	--
hypothalamus-VS-cerebellum	chr17	64720653	64720698	0.22963	7	0.0011655	0.0021131	0.45885	0.22922	--	--	--	--	--	--
hypothalamus-VS-cerebellum	chr17	64721261	64721418	0.288374	7	0.00058275	0.0017598	0.55443	0.26606	--	--	--	--	--	--
hypothalamus-VS-cerebellum	chr17	64722370	64722486	0.240887	10	1.0825e-05	1.8219e-05	0.43598	0.19509	--	--	--	--	--	RAB35
hypothalamus-VS-cerebellum	chr17	64722687	64722769	0.285633	5	0.0079365	0.018574	0.42735	0.14172	--	--	--	--	--	RAB35
hypothalamus-VS-cerebellum	chr17	64725759	64726535	0.198582	18	7.0332e-06	0.0001673	0.38628	0.1877	--	--	RAB35	--	RAB35	--
hypothalamus-VS-cerebellum	chr17	64727409	64727472	0.266013	5	0.0079365	0.0010142	0.4609	0.19489	--	--	--	RAB35	--	--
hypothalamus-VS-cerebellum	chr17	64727549	64727663	0.202151	7	0.006993	0.03693	0.39251	0.19036	--	--	RAB35	--	--	--
hypothalamus-VS-cerebellum	chr17	64731304	64731424	0.129409	5	0.0079365	0.01905	0.35479	0.22538	--	--	--	RAB35	--	--
hypothalamus-VS-cerebellum	chr17	64736283	64736342	0.31047	7	0.00058275	0.0020384	0.53747	0.227	--	--	--	RAB35	--	--
hypothalamus-VS-cerebellum	chr17	64760587	64760709	0.243429	5	0.0079365	0.013494	0.44742	0.20399	--	--	--	--	--	--
hypothalamus-VS-cerebellum	chr17	64786635	64786729	0.120003	5	0.0079365	0.0025499	0.27368	0.15368	--	--	--	--	--	--
hypothalamus-VS-cerebellum	chr17	64827660	64827984	0.199405	5	0.0079365	0.021573	0.39406	0.19466	--	--	--	--	--	--
hypothalamus-VS-cerebellum	chr17	65212567	65212598	0.282653	5	0.0079365	0.016173	0.4938	0.21114	--	--	UNC119B	--	--	--
hypothalamus-VS-cerebellum	chr17	65742868	65743253	0.21584	5	0.031746	0.041866	0.42531	0.20947	--	--	--	--	--	--
hypothalamus-VS-cerebellum	chr17	66406722	66406925	0.208011	5	0.0079365	0.024008	0.46507	0.25706	--	--	--	--	--	--
hypothalamus-VS-cerebellum	chr17	66431697	66432100	0.239681	11	0.0018599	0.0024665	0.46696	0.22728	--	--	--	--	--	--
hypothalamus-VS-cerebellum	chr17	66622087	66622196	0.145568	6	0.015152	0.045992	0.22553	0.079967	--	--	SART3	--	--	--
hypothalamus-VS-cerebellum	chr17	66786852	66786917	0.198728	5	0.0079365	0.0034016	0.33431	0.13558	--	--	--	--	--	--
hypothalamus-VS-cerebellum	chr17	66852949	66853421	0.124348	9	0.010613	0.031997	0.29878	0.17444	--	--	--	--	--	--
hypothalamus-VS-cerebellum	chr17	67407702	67408152	0.172565	11	0.0018599	0.011857	0.31579	0.14322	--	--	--	--	--	--
hypothalamus-VS-cerebellum	chr17	67415132	67415715	0.153377	16	0.00025636	0.00039976	0.28585	0.13247	--	--	--	--	--	--
hypothalamus-VS-cerebellum	chr17	67504897	67505139	0.142938	5	0.0079365	0.020359	0.34441	0.20147	--	--	--	--	--	--
hypothalamus-VS-cerebellum	chr17	67547650	67547906	0.209495	8	0.0001554	0.00021478	0.38048	0.17099	--	--	--	CRYBB3	--	--
hypothalamus-VS-cerebellum	chr17	67686977	67687181	0.252842	10	2.165e-05	0.00035794	0.40504	0.1522	--	--	--	GRK3	--	--
hypothalamus-VS-cerebellum	chr17	67923143	67923274	0.122605	8	0.020668	0.037046	0.31309	0.19048	--	--	--	--	--	--
hypothalamus-VS-cerebellum	chr17	67923743	67923828	0.288053	5	0.0079365	0.010222	0.4774	0.18935	--	--	--	--	--	--
hypothalamus-VS-cerebellum	chr17	67924627	67924692	0.216539	5	0.015873	0.0085351	0.44246	0.22592	--	--	--	--	--	--
hypothalamus-VS-cerebellum	chr17	67928821	67928976	0.248991	5	0.031746	0.011965	0.45009	0.2011	--	--	--	--	--	--
hypothalamus-VS-cerebellum	chr17	67933615	67933847	0.213152	11	1.1341e-05	0.00017287	0.40388	0.19073	--	--	--	--	--	--
hypothalamus-VS-cerebellum	chr17	67999297	67999366	0.205032	5	0.031746	0.042731	0.40733	0.2023	--	--	--	--	--	--
hypothalamus-VS-cerebellum	chr17	68002393	68002458	0.288061	5	0.031746	0.038188	0.54056	0.2525	--	--	--	--	--	--
hypothalamus-VS-cerebellum	chr17	68179581	68179669	0.285047	6	0.015152	0.0085551	0.562	0.27695	--	--	--	--	--	--
hypothalamus-VS-cerebellum	chr17	68241368	68241629	0.260436	6	0.015152	0.04953	0.4455	0.18507	--	--	--	--	--	--
hypothalamus-VS-cerebellum	chr17	68249617	68250301	0.199763	10	0.0038862	0.027121	0.45466	0.2549	--	--	--	--	--	--
hypothalamus-VS-cerebellum	chr17	68354136	68354485	0.258366	11	2.8351e-06	0.0010715	0.38647	0.1281	--	--	--	--	--	--
hypothalamus-VS-cerebellum	chr17	68355002	68355128	0.286927	8	0.0001554	0.00011595	0.43647	0.14955	--	--	--	--	--	--
hypothalamus-VS-cerebellum	chr17	68363682	68364018	0.241376	9	0.0018511	0.033913	0.42567	0.18429	--	--	--	--	--	--
hypothalamus-VS-cerebellum	chr17	68372608	68373073	0.163104	16	8.8679e-05	0.0016483	0.38057	0.21747	--	--	--	--	--	--
hypothalamus-VS-cerebellum	chr17	68378804	68379212	-0.108502	6	0.008658	0.013023	0.10902	0.21752	--	--	--	--	--	--
hypothalamus-VS-cerebellum	chr17	68383606	68383656	0.187832	5	0.031746	0.011131	0.34303	0.1552	--	--	--	--	--	--
hypothalamus-VS-cerebellum	chr17	68418323	68418602	0.108115	5	0.0079365	0.0018378	0.42529	0.31718	--	--	--	--	--	TFIP11
hypothalamus-VS-cerebellum	chr17	68421267	68421409	0.210555	5	0.015873	0.009971	0.41271	0.20216	--	--	--	TFIP11	--	--
hypothalamus-VS-cerebellum	chr17	68424314	68424829	0.160469	15	0.0020008	0.039261	0.3443	0.18383	--	--	TFIP11	--	--	--
hypothalamus-VS-cerebellum	chr17	68425395	68425656	0.157342	7	0.037879	0.038933	0.34317	0.18583	--	--	--	TFIP11	--	--
hypothalamus-VS-cerebellum	chr17	68434511	68434582	0.158611	5	0.0079365	0.012764	0.37227	0.21366	--	--	TFIP11	--	--	--
hypothalamus-VS-cerebellum	chr17	68443428	68443578	0.12163	5	0.0079365	0.015372	0.30465	0.18302	--	--	--	--	--	--
hypothalamus-VS-cerebellum	chr17	68479698	68479771	0.339487	6	0.0021645	0.00088034	0.40098	0.061493	--	TPST2	--	TPST2	--	--
hypothalamus-VS-cerebellum	chr17	69760850	69760927	0.181527	5	0.0079365	0.0024794	0.34128	0.15975	--	--	--	--	--	--
hypothalamus-VS-cerebellum	chr17	70463665	70463799	0.180314	6	0.0021645	0.00025208	0.38353	0.20321	--	--	--	--	--	--
hypothalamus-VS-cerebellum	chr17	70532998	70533086	0.120757	7	0.002331	0.0071855	0.31902	0.19827	--	--	--	--	--	--
hypothalamus-VS-cerebellum	chr17	70533092	70533122	0.215302	5	0.0079365	0.0022933	0.35394	0.13864	--	--	--	--	--	--
hypothalamus-VS-cerebellum	chr17	70533436	70533782	0.117344	9	0.0077746	0.034783	0.27187	0.15453	--	--	--	--	--	--
hypothalamus-VS-cerebellum	chr17	70547998	70548022	-0.174503	5	0.0079365	0.003209	0.18729	0.36179	--	--	--	--	--	--
hypothalamus-VS-cerebellum	chr17	70657945	70657975	0.183976	5	0.0079365	0.0011094	0.3746	0.19062	--	--	EMID1	--	--	--
hypothalamus-VS-cerebellum	chr17	70662099	70662618	0.153301	11	0.0014006	0.011909	0.34612	0.19282	--	--	--	EMID1	--	--
hypothalamus-VS-cerebellum	chr17	70713035	70713558	0.249294	11	0.0066342	0.023823	0.43399	0.18469	--	--	EWSR1	EWSR1	--	--
hypothalamus-VS-cerebellum	chr17	70721039	70721085	0.255656	5	0.0079365	0.011278	0.57808	0.32242	--	--	--	GAS2L1	--	--
hypothalamus-VS-cerebellum	chr17	70724163	70724388	0.166675	8	0.006993	0.037295	0.48954	0.32287	--	--	GAS2L1	--	--	RASL10A
hypothalamus-VS-cerebellum	chr17	70734516	70734639	0.22829	5	0.0079365	0.0011856	0.57807	0.34978	--	--	--	--	--	AP1B1
hypothalamus-VS-cerebellum	chr17	70735296	70735677	0.117603	10	0.018543	0.01335	0.41652	0.29892	--	--	AP1B1	--	AP1B1	--
hypothalamus-VS-cerebellum	chr17	70736011	70736878	0.177449	29	1.606e-06	0.00014219	0.4041	0.22665	--	--	--	AP1B1	--	--
hypothalamus-VS-cerebellum	chr17	70745630	70746065	0.247556	13	8.6533e-06	0.00020376	0.42246	0.1749	--	--	AP1B1	AP1B1	--	--
hypothalamus-VS-cerebellum	chr17	70797917	70798072	0.137261	12	5.1772e-06	0.0010386	0.26613	0.12887	--	--	--	--	--	--
hypothalamus-VS-cerebellum	chr17	70944658	70944755	0.218342	5	0.0079365	0.002736	0.36494	0.1466	--	--	--	--	--	--
hypothalamus-VS-cerebellum	chr17	70957070	70957195	0.154739	10	0.00072528	0.0027125	0.29932	0.14458	--	--	--	--	--	--
hypothalamus-VS-cerebellum	chr17	70966723	70967016	0.204059	5	0.0079365	0.013225	0.56335	0.35929	--	--	--	--	--	--
hypothalamus-VS-cerebellum	chr17	71008494	71009229	0.100086	10	0.0028795	0.00096593	0.3155	0.21542	--	--	--	--	--	--
hypothalamus-VS-cerebellum	chr17	71015168	71015209	0.134754	5	0.0079365	0.0023856	0.40382	0.26907	--	--	--	--	--	ZMAT5
hypothalamus-VS-cerebellum	chr17	71025936	71026334	0.250524	9	0.00016454	0.0025552	0.45401	0.20349	--	--	ZMAT5	--	--	--
hypothalamus-VS-cerebellum	chr17	71058286	71058360	0.158033	5	0.0079365	0.0069382	0.40249	0.24445	--	--	ASCC2	--	--	--
hypothalamus-VS-cerebellum	chr17	71065895	71066196	0.161835	8	0.0001554	0.0031541	0.3331	0.17126	--	--	ASCC2	ASCC2	--	--
hypothalamus-VS-cerebellum	chr17	71392583	71392653	0.184031	5	0.0079365	0.010228	0.42603	0.242	--	--	--	--	--	--
hypothalamus-VS-cerebellum	chr17	71393042	71393291	0.215871	5	0.0079365	0.00078792	0.40219	0.18632	--	--	--	--	--	--
hypothalamus-VS-cerebellum	chr17	71436442	71437000	0.148013	19	0.006339	0.018418	0.39417	0.24616	--	--	--	OSM	--	--
hypothalamus-VS-cerebellum	chr17	71452347	71452511	0.12072	5	0.015873	0.035582	0.35744	0.23672	--	--	--	--	--	CASTOR1
hypothalamus-VS-cerebellum	chr17	71501117	71501532	0.251225	11	0.00055285	0.0062678	0.46033	0.2091	--	--	SF3A1	SF3A1	--	--
hypothalamus-VS-cerebellum	chr17	71521523	71521722	0.337077	5	0.0079365	0.024268	0.49291	0.15583	--	--	CCDC157	--	--	--
hypothalamus-VS-cerebellum	chr17	71528119	71528422	0.163841	8	0.037918	0.033772	0.37956	0.21572	--	--	CCDC157	--	--	--
hypothalamus-VS-cerebellum	chr17	71528450	71528487	0.353222	5	0.0079365	0.0021768	0.56948	0.21625	--	--	--	CCDC157	--	--
hypothalamus-VS-cerebellum	chr17	71531949	71532753	0.120074	12	0.010045	0.039287	0.30501	0.18493	--	--	--	--	--	--
hypothalamus-VS-cerebellum	chr17	71532775	71533135	0.292835	7	0.00058275	0.00048531	0.50499	0.21215	--	--	--	--	--	--
hypothalamus-VS-cerebellum	chr17	71752514	71752582	0.196803	5	0.0079365	0.0045996	0.34299	0.14619	--	--	DUSP18	--	--	--
hypothalamus-VS-cerebellum	chr17	71761418	71761468	0.141142	5	0.031746	0.015835	0.50666	0.36552	--	--	--	--	--	C17H5orf52
hypothalamus-VS-cerebellum	chr17	71867958	71868182	0.180338	5	0.0079365	0.016432	0.44456	0.26422	--	--	--	OSBP2	--	--
hypothalamus-VS-cerebellum	chr17	71926753	71926811	0.24665	5	0.031746	0.038832	0.43918	0.19253	--	--	--	MORC2	--	--
hypothalamus-VS-cerebellum	chr17	72054031	72054484	-0.201832	13	5.2305e-05	0.00049176	0.07846	0.28029	--	--	--	SMTN	--	--
hypothalamus-VS-cerebellum	chr17	72055522	72055692	0.292067	8	0.0003108	0.0029519	0.51657	0.2245	--	--	--	SMTN	--	--
hypothalamus-VS-cerebellum	chr17	72058257	72058328	0.20232	7	0.017483	0.047277	0.44997	0.24765	--	--	--	SMTN	--	--
hypothalamus-VS-cerebellum	chr17	72231559	72231593	0.292749	5	0.0079365	0.009992	0.47726	0.18451	--	--	--	PATZ1	--	--
hypothalamus-VS-cerebellum	chr17	72231730	72231992	-0.105551	9	0.031469	0.033125	0.1816	0.28715	--	--	--	PATZ1	--	--
hypothalamus-VS-cerebellum	chr17	72237550	72237925	0.209203	19	3.611e-05	0.000154	0.44187	0.23266	--	--	--	PATZ1	--	--
hypothalamus-VS-cerebellum	chr17	72421030	72421124	0.219832	5	0.0079365	0.013601	0.37991	0.16007	--	--	--	--	--	--
hypothalamus-VS-cerebellum	chr17	72422471	72422555	0.202243	5	0.0079365	0.01098	0.41793	0.21569	--	--	--	--	--	--
hypothalamus-VS-cerebellum	chr17	72427410	72427498	0.358965	5	0.0079365	0.016309	0.65148	0.29252	--	--	--	PISD	--	--
hypothalamus-VS-cerebellum	chr17	73196548	73196763	0.189494	5	0.0079365	0.0032461	0.36213	0.17264	--	--	ZNF70	--	--	--
hypothalamus-VS-cerebellum	chr17	73196792	73196870	0.107216	5	0.031746	0.011322	0.24145	0.13423	--	--	ZNF70	--	--	--
hypothalamus-VS-cerebellum	chr17	73213957	73214020	0.349518	5	0.0079365	0.0054942	0.56177	0.21225	--	--	--	--	--	--
hypothalamus-VS-cerebellum	chr17	73217829	73217884	0.266342	5	0.0079365	0.003066	0.503	0.23666	--	--	--	--	--	--
hypothalamus-VS-cerebellum	chr17	73226159	73226482	0.212902	6	0.008658	0.0077957	0.48747	0.27457	--	--	SMARCB1	--	--	--
hypothalamus-VS-cerebellum	chr17	73227072	73227106	0.105935	5	0.0079365	0.0069644	0.47335	0.36742	--	--	--	SMARCB1	--	--
hypothalamus-VS-cerebellum	chr17	73229252	73229317	0.151532	5	0.0079365	0.0036627	0.53507	0.38354	--	--	--	SMARCB1	--	--
hypothalamus-VS-cerebellum	chr17	73240868	73241067	0.315646	5	0.0079365	0.002885	0.50903	0.19338	--	--	--	--	--	DERL3,SMARCB1
hypothalamus-VS-cerebellum	chr17	73260948	73261013	0.2962	5	0.0079365	0.017008	0.51746	0.22126	--	--	--	SLC2A11	--	--
hypothalamus-VS-cerebellum	chr17	73283712	73284014	0.117004	5	0.0079365	0.0051225	0.26403	0.14703	--	--	--	--	--	--
hypothalamus-VS-cerebellum	chr17	73332914	73333098	0.266635	17	1.1255e-05	3.8319e-05	0.45163	0.18499	--	--	--	--	--	--
hypothalamus-VS-cerebellum	chr17	73336077	73336410	0.195875	5	0.015873	0.034538	0.44028	0.24441	--	--	--	--	--	--
hypothalamus-VS-cerebellum	chr17	73337033	73337495	0.158954	13	0.00079495	0.0092715	0.34726	0.1883	--	--	--	--	--	--
hypothalamus-VS-cerebellum	chr17	73348323	73348426	0.25882	5	0.0079365	0.0023861	0.44733	0.18851	--	--	--	--	--	--
hypothalamus-VS-cerebellum	chr17	73360090	73360580	0.179924	14	0.0017814	0.027468	0.40491	0.22498	--	--	--	--	--	--
hypothalamus-VS-cerebellum	chr17	73361535	73361704	0.16234	11	0.00076549	0.011818	0.31426	0.15192	--	--	--	--	--	--
hypothalamus-VS-cerebellum	chr17	73362277	73362456	0.24334	6	0.008658	0.047075	0.33332	0.089978	--	--	--	--	--	--
hypothalamus-VS-cerebellum	chr17	73366573	73366651	0.187262	5	0.0079365	0.00091329	0.37182	0.18456	--	--	--	--	--	--
hypothalamus-VS-cerebellum	chr17	73366921	73367665	0.111612	16	0.0074526	0.0060843	0.30579	0.19418	--	--	--	--	--	--
hypothalamus-VS-cerebellum	chr17	73368748	73368830	0.206863	9	0.00016454	0.0026187	0.40246	0.19559	--	--	--	--	--	--
hypothalamus-VS-cerebellum	chr17	73373730	73374052	0.146468	5	0.0079365	0.0028621	0.35257	0.2061	--	--	--	--	--	--
hypothalamus-VS-cerebellum	chr17	73374268	73375017	0.145665	21	0.00010167	0.0045951	0.38629	0.24063	--	--	--	--	--	--
hypothalamus-VS-cerebellum	chr17	73376960	73377216	0.246847	9	0.00016454	0.015068	0.46722	0.22038	--	--	--	--	--	--
hypothalamus-VS-cerebellum	chr17	73377878	73378813	0.253985	37	2.3297e-09	1.5941e-06	0.50122	0.24723	--	--	--	--	--	--
hypothalamus-VS-cerebellum	chr17	73388552	73389115	0.188216	16	0.00091112	0.0060008	0.43785	0.24963	--	--	--	--	--	--
hypothalamus-VS-cerebellum	chr17	73390169	73390306	0.154031	5	0.015873	0.042465	0.35841	0.20437	--	--	--	--	--	--
hypothalamus-VS-cerebellum	chr17	73391237	73391558	0.233329	10	0.00020568	0.0010277	0.36376	0.13043	--	--	--	--	--	--
hypothalamus-VS-cerebellum	chr17	73391891	73392325	0.183884	9	0.0039901	0.031409	0.35456	0.17067	--	--	--	--	--	--
hypothalamus-VS-cerebellum	chr17	73397574	73398000	0.167939	17	6.0035e-05	0.00037271	0.39246	0.22452	--	--	--	--	--	--
hypothalamus-VS-cerebellum	chr17	73398830	73398917	0.29082	5	0.0079365	0.0012549	0.51373	0.22291	--	--	--	--	--	--
hypothalamus-VS-cerebellum	chr17	73478932	73479040	0.148106	5	0.031746	0.040866	0.37494	0.22683	--	--	--	--	--	SNRPD3
hypothalamus-VS-cerebellum	chr17	73481210	73481360	0.179711	10	0.0028795	0.02739	0.38713	0.20742	--	--	SNRPD3	SNRPD3	--	--
hypothalamus-VS-cerebellum	chr17	73489767	73490126	0.118852	12	0.010045	0.038509	0.33774	0.21888	--	--	--	GUCD1	--	--
hypothalamus-VS-cerebellum	chr17	73493258	73493607	0.133931	9	0.024434	0.030883	0.36352	0.22959	--	--	GUCD1	--	--	--
hypothalamus-VS-cerebellum	chr17	73495131	73495240	0.20679	5	0.0079365	0.01144	0.40815	0.20136	--	--	--	GUCD1	--	--
hypothalamus-VS-cerebellum	chr17	73536687	73536782	0.45224	6	0.004329	0.04241	0.90208	0.44984	--	--	--	--	--	--
hypothalamus-VS-cerebellum	chr17	73569000	73569875	0.208426	7	0.026224	0.036338	0.29106	0.082637	--	--	--	--	--	--
hypothalamus-VS-cerebellum	chr17	73589908	73590047	0.190947	7	0.017483	0.040337	0.43574	0.24479	--	--	--	--	--	--
hypothalamus-VS-cerebellum	chr17	73599389	73599626	0.31574	5	0.0079365	0.020121	0.43983	0.12409	--	--	SPECC1L	--	--	--
hypothalamus-VS-cerebellum	chr17	73600363	73601062	0.13231	7	0.026224	0.037628	0.46189	0.32958	--	--	--	SPECC1L	--	--
hypothalamus-VS-cerebellum	chr17	73604422	73604474	0.161555	7	0.002331	0.017242	0.37695	0.21539	--	--	--	SPECC1L	--	--
hypothalamus-VS-cerebellum	chr17	73626067	73626205	0.221045	8	0.0010878	0.0072018	0.50833	0.28729	--	--	--	SPECC1L	--	--
hypothalamus-VS-cerebellum	chr17	73628822	73629178	0.155282	5	0.015873	0.038313	0.34355	0.18827	--	--	--	SPECC1L	--	--
hypothalamus-VS-cerebellum	chr17	73646739	73646971	0.24149	12	2.2188e-05	0.0010938	0.41387	0.17238	--	--	--	SPECC1L	--	--
hypothalamus-VS-cerebellum	chr17	73653917	73653959	0.184932	5	0.0079365	0.0015164	0.37802	0.19309	--	--	--	SPECC1L	--	--
hypothalamus-VS-cerebellum	chr17	73656525	73656718	0.219637	7	0.00058275	0.00052911	0.61482	0.39519	--	--	--	SPECC1L	--	--
hypothalamus-VS-cerebellum	chr17	73672988	73673102	0.245369	8	0.0003108	0.00652	0.46128	0.21591	--	--	--	--	--	--
hypothalamus-VS-cerebellum	chr17	73690812	73691105	0.253401	12	2.9584e-06	0.00017942	0.55223	0.29883	--	--	--	--	--	--
hypothalamus-VS-cerebellum	chr17	73700752	73701263	0.24595	8	0.006993	0.033967	0.5231	0.27715	--	--	--	--	--	--
hypothalamus-VS-cerebellum	chr17	73702063	73702196	-0.170096	8	0.0018648	0.014465	0.08406	0.25416	--	--	--	--	--	--
hypothalamus-VS-cerebellum	chr17	73702451	73702541	0.217988	5	0.015873	0.043215	0.58514	0.36715	--	--	--	--	--	--
hypothalamus-VS-cerebellum	chr17	73704026	73704075	0.103078	5	0.0079365	0.00087044	0.28069	0.17761	--	--	--	--	--	--
hypothalamus-VS-cerebellum	chr17	73708679	73708862	0.35919	7	0.00058275	0.00065936	0.52358	0.16439	--	--	--	--	--	--
hypothalamus-VS-cerebellum	chr17	73712083	73712565	0.132741	11	0.023308	0.0055452	0.30254	0.1698	--	--	--	--	--	--
hypothalamus-VS-cerebellum	chr17	73716940	73716990	0.171949	5	0.0079365	0.014117	0.43256	0.26062	--	--	--	--	--	--
hypothalamus-VS-cerebellum	chr17	73720505	73720574	0.172634	7	0.00058275	0.0020148	0.33362	0.16098	--	--	--	--	--	--
hypothalamus-VS-cerebellum	chr17	73730492	73730569	0.213061	6	0.004329	0.0045466	0.36884	0.15578	--	--	--	--	--	--
hypothalamus-VS-cerebellum	chr17	73736434	73736547	0.232693	5	0.015873	0.04435	0.48262	0.24993	--	--	--	--	--	--
hypothalamus-VS-cerebellum	chr17	73747094	73747170	0.165651	11	0.00039408	0.0057412	0.37434	0.20869	--	--	--	--	--	--
hypothalamus-VS-cerebellum	chr17	73748737	73749000	0.18287	15	0.0039425	0.0070951	0.45717	0.2743	--	--	--	--	--	--
hypothalamus-VS-cerebellum	chr17	73749408	73749497	0.377312	7	0.002331	0.0066059	0.44239	0.065077	--	--	--	--	--	--
hypothalamus-VS-cerebellum	chr17	73749574	73749612	0.191177	5	0.0079365	0.0041147	0.32429	0.13311	--	--	--	--	--	--
hypothalamus-VS-cerebellum	chr17	73752303	73752561	0.494878	8	0.0003108	0.0047114	0.68707	0.19219	--	--	--	--	--	--
hypothalamus-VS-cerebellum	chr17	73754566	73754642	0.348004	5	0.0079365	0.012775	0.63846	0.29046	--	--	--	--	--	--
hypothalamus-VS-cerebellum	chr17	73755395	73755709	0.245028	8	0.0018648	0.036902	0.41761	0.17258	--	--	--	--	--	--
hypothalamus-VS-cerebellum	chr17	73763670	73763722	-0.13864	5	0.0079365	0.0038283	0.10545	0.24409	--	--	--	--	--	--
hypothalamus-VS-cerebellum	chr17	73765578	73765703	0.284398	7	0.0011655	0.017764	0.56507	0.28068	--	--	--	--	--	--
hypothalamus-VS-cerebellum	chr17	73771045	73771075	0.221413	5	0.0079365	0.012671	0.4663	0.24488	--	--	--	--	--	--
hypothalamus-VS-cerebellum	chr17	73771446	73771495	0.127605	5	0.0079365	0.024601	0.42333	0.29573	--	--	--	--	--	--
hypothalamus-VS-cerebellum	chr17	73783245	73783991	0.192172	15	0.00053336	0.0071198	0.3491	0.15693	--	--	--	--	--	--
hypothalamus-VS-cerebellum	chr17	73787767	73787846	0.212227	5	0.0079365	0.013726	0.39973	0.1875	--	--	--	--	--	--
hypothalamus-VS-cerebellum	chr17	73790408	73790711	0.186607	9	0.024434	0.030611	0.37442	0.18781	--	--	--	--	--	--
hypothalamus-VS-cerebellum	chr17	73791152	73791498	0.12257	10	0.005196	0.014032	0.31028	0.18771	--	--	--	--	--	--
hypothalamus-VS-cerebellum	chr17	73818208	73818309	0.186631	9	0.0012341	0.014311	0.44142	0.25478	--	--	--	RSPH14	--	--
hypothalamus-VS-cerebellum	chr17	73819252	73819607	0.218532	5	0.031746	0.034666	0.49968	0.28115	--	--	--	RSPH14	--	--
hypothalamus-VS-cerebellum	chr17	73820229	73820597	0.168202	10	4.33e-05	0.013627	0.4729	0.3047	--	--	--	RSPH14	--	--
hypothalamus-VS-cerebellum	chr17	73827733	73827779	0.144561	5	0.0079365	0.0025521	0.28534	0.14078	--	--	--	RSPH14	--	--
hypothalamus-VS-cerebellum	chr17	73828424	73828538	0.172829	10	0.005196	0.027189	0.56783	0.395	--	--	--	RSPH14	--	--
hypothalamus-VS-cerebellum	chr17	73831776	73831817	0.186134	5	0.0079365	0.015017	0.3548	0.16867	--	--	--	RSPH14	--	--
hypothalamus-VS-cerebellum	chr17	73832267	73832590	0.23771	10	0.00020568	0.00608	0.54707	0.30936	--	--	--	RSPH14	--	--
hypothalamus-VS-cerebellum	chr17	73833302	73833395	-0.137598	5	0.0079365	0.037788	0.13649	0.27408	--	--	--	RSPH14	--	--
hypothalamus-VS-cerebellum	chr17	73833617	73834230	0.153423	12	0.0045131	0.010816	0.39419	0.24077	--	--	--	RSPH14	--	--
hypothalamus-VS-cerebellum	chr17	73846751	73846958	0.146808	5	0.015873	0.0044889	0.30207	0.15526	--	--	--	RSPH14	--	--
hypothalamus-VS-cerebellum	chr17	73888764	73888894	0.228587	7	0.0011655	0.0018976	0.43574	0.20715	--	--	--	LOC531152	--	--
hypothalamus-VS-cerebellum	chr17	73907947	73908061	0.177937	11	0.00018995	5.6356e-05	0.37486	0.19692	--	--	--	--	--	--
hypothalamus-VS-cerebellum	chr17	73949485	73949908	0.178643	8	0.004662	0.014447	0.40662	0.22798	--	--	TOP3B	--	--	--
hypothalamus-VS-cerebellum	chr17	73953426	73954059	0.156375	14	0.00040321	0.00096383	0.38199	0.22562	--	--	--	--	--	--
hypothalamus-VS-cerebellum	chr17	73959652	73960083	0.120224	20	0.0031936	0.0092104	0.37071	0.25049	--	--	--	--	--	--
hypothalamus-VS-cerebellum	chr17	73964277	73964488	0.177614	9	0.0039901	0.032559	0.43927	0.26166	--	--	--	--	--	--
hypothalamus-VS-cerebellum	chr17	73968853	73969353	0.164618	13	0.00038402	0.0022522	0.40363	0.23901	--	--	--	--	--	--
hypothalamus-VS-cerebellum	chr17	73969702	73970132	0.127364	12	0.0011146	0.0050277	0.36994	0.24258	--	--	--	--	--	--
hypothalamus-VS-cerebellum	chr17	74023818	74024171	0.292894	9	0.00078157	0.002865	0.44792	0.15502	--	--	--	MAPK1	--	--
hypothalamus-VS-cerebellum	chr17	74025005	74025233	-0.107176	8	0.010412	0.025812	0.13887	0.24605	--	--	--	MAPK1	--	--
hypothalamus-VS-cerebellum	chr17	74029682	74029769	0.235076	7	0.00058275	0.0063971	0.38077	0.1457	--	--	--	MAPK1	--	--
hypothalamus-VS-cerebellum	chr17	74035501	74035689	0.218073	8	0.0001554	0.00040877	0.41369	0.19562	--	--	--	--	--	MAPK1
hypothalamus-VS-cerebellum	chr17	74038194	74038314	0.172609	10	0.00032475	0.013399	0.3682	0.19559	--	--	--	--	--	--
hypothalamus-VS-cerebellum	chr17	74038747	74038805	0.201915	5	0.0079365	0.001195	0.40038	0.19847	--	--	--	--	--	--
hypothalamus-VS-cerebellum	chr17	74039433	74039485	0.253792	5	0.0079365	0.014372	0.41319	0.1594	--	--	--	--	--	--
hypothalamus-VS-cerebellum	chr17	74070898	74070951	0.191487	5	0.031746	0.038957	0.37731	0.18582	--	--	YPEL1	PRODH	PRODH	--
hypothalamus-VS-cerebellum	chr17	74073770	74074380	0.105497	12	0.002914	0.021057	0.28922	0.18372	--	--	PPIL2	PRODH	PRODH,PPIL2	YPEL1
hypothalamus-VS-cerebellum	chr17	74075551	74075871	0.163346	5	0.0079365	0.013113	0.35889	0.19554	--	--	PPIL2	PRODH,PPIL2	PRODH	--
hypothalamus-VS-cerebellum	chr17	74076623	74076672	0.152537	5	0.0079365	0.038056	0.33685	0.18431	--	--	--	PRODH,PPIL2	PRODH	--
hypothalamus-VS-cerebellum	chr17	74111913	74111956	0.292559	5	0.0079365	0.011663	0.49311	0.20055	--	--	CCDC116	PRODH	PRODH	--
hypothalamus-VS-cerebellum	chr17	74134472	74134586	0.188053	8	0.0006216	0.0060901	0.41972	0.23167	--	--	--	PRODH,UBE2L3	PRODH	--
hypothalamus-VS-cerebellum	chr17	74136833	74136907	0.281801	5	0.0079365	0.038437	0.55155	0.26974	--	--	--	PRODH	PRODH	--
hypothalamus-VS-cerebellum	chr17	74138609	74138805	0.15734	13	0.00049305	0.0048878	0.44095	0.28361	--	--	--	PRODH	PRODH	--
hypothalamus-VS-cerebellum	chr17	74156428	74157041	0.150708	15	0.00062176	0.0018709	0.34073	0.19002	--	--	--	PRODH	PRODH	--
hypothalamus-VS-cerebellum	chr17	74158404	74158461	0.221427	5	0.0079365	0.0034535	0.4816	0.26017	--	--	--	PRODH	PRODH	--
hypothalamus-VS-cerebellum	chr17	74175567	74175914	0.273435	11	2.8351e-06	0.00015538	0.40567	0.13223	--	--	--	PRODH	PRODH	--
hypothalamus-VS-cerebellum	chr17	74177648	74178095	0.170998	12	0.0055596	0.010816	0.36445	0.19345	--	--	--	PRODH	PRODH	--
hypothalamus-VS-cerebellum	chr17	74178738	74179033	0.281699	9	0.00016454	0.002348	0.45713	0.17543	--	--	--	PRODH	PRODH	--
hypothalamus-VS-cerebellum	chr17	74184907	74185242	0.170965	11	0.0041025	0.012494	0.4968	0.32584	--	--	HIC2	PRODH	PRODH	--
hypothalamus-VS-cerebellum	chr17	74185575	74185698	0.181344	7	0.00058275	0.00081098	0.34471	0.16337	--	--	HIC2	PRODH	PRODH	--
hypothalamus-VS-cerebellum	chr17	74188781	74188962	0.168515	7	0.00058275	0.00054067	0.40902	0.2405	--	--	--	PRODH	PRODH	--
hypothalamus-VS-cerebellum	chr17	74203362	74203456	0.208104	9	0.00028795	0.0023569	0.37024	0.16214	--	--	PI4KA	PRODH	PRODH	--
hypothalamus-VS-cerebellum	chr17	74204015	74204115	0.212794	5	0.0079365	0.014143	0.37454	0.16175	--	--	--	PRODH,PI4KA	PRODH	--
hypothalamus-VS-cerebellum	chr17	74206274	74206354	0.169501	5	0.015873	0.010923	0.35071	0.18121	--	--	--	PRODH,PI4KA	PRODH	--
hypothalamus-VS-cerebellum	chr17	74214928	74214990	0.170011	5	0.0079365	0.011777	0.36635	0.19634	--	--	--	PRODH,PI4KA	PRODH	--
hypothalamus-VS-cerebellum	chr17	74218540	74218734	0.175449	14	0.00028357	0.00046288	0.37701	0.20156	--	--	--	PRODH,PI4KA	PRODH	--
hypothalamus-VS-cerebellum	chr17	74221420	74221604	0.241691	9	0.00016454	0.0025728	0.34597	0.10428	--	--	--	PRODH,PI4KA	PRODH	--
hypothalamus-VS-cerebellum	chr17	74230289	74230482	0.222734	5	0.0079365	0.010633	0.43966	0.21692	--	--	SERPIND1	PRODH,PI4KA	PRODH,SERPIND1	--
hypothalamus-VS-cerebellum	chr17	74255559	74255612	0.189349	5	0.015873	0.0050848	0.3545	0.16515	--	PI4KA	--	PRODH,PI4KA	PRODH	--
hypothalamus-VS-cerebellum	chr17	74256924	74257282	0.163517	9	0.0077746	0.016499	0.34852	0.185	--	PI4KA	--	PRODH,PI4KA	PRODH	--
hypothalamus-VS-cerebellum	chr17	74291795	74291859	0.271066	5	0.0079365	0.016144	0.4901	0.21904	--	--	--	PRODH	PRODH	--
hypothalamus-VS-cerebellum	chr17	74292814	74292917	0.418048	6	0.0021645	0.0042407	0.70821	0.29017	--	--	--	PRODH	PRODH	--
hypothalamus-VS-cerebellum	chr17	74298159	74298520	0.310628	15	6.2641e-05	0.0037062	0.60819	0.29756	--	--	--	PRODH	PRODH	--
hypothalamus-VS-cerebellum	chr17	74308908	74308950	0.215744	5	0.0079365	0.041625	0.50841	0.29267	--	--	--	PRODH,AIFM3	PRODH	--
hypothalamus-VS-cerebellum	chr17	74311403	74311429	0.104138	5	0.015873	0.044662	0.27094	0.1668	--	--	AIFM3	PRODH	PRODH	--
hypothalamus-VS-cerebellum	chr17	74324737	74324832	0.211324	6	0.0021645	0.020446	0.4191	0.20778	--	--	--	PRODH,LZTR1	PRODH	--
hypothalamus-VS-cerebellum	chr17	74331164	74331209	0.264917	5	0.0079365	0.0033667	0.65513	0.39021	--	--	LZTR1	PRODH	PRODH	THAP7
hypothalamus-VS-cerebellum	chr17	74338088	74338495	0.135048	21	1.6018e-05	0.00024612	0.30933	0.17429	--	--	TUBA3E	PRODH	PRODH	--
hypothalamus-VS-cerebellum	chr17	74338557	74339120	0.195693	26	8.5219e-07	1.999e-05	0.37912	0.18343	--	--	TUBA3E	PRODH,TUBA3E	PRODH	--
hypothalamus-VS-cerebellum	chr17	74339131	74339208	0.276355	7	0.006993	0.0068892	0.54347	0.26711	--	--	--	PRODH,TUBA3E	PRODH	--
hypothalamus-VS-cerebellum	chr17	74366400	74366621	0.257084	8	0.004662	0.0058233	0.43816	0.18108	--	--	SLC7A4	PRODH,SLC7A4	PRODH	--
hypothalamus-VS-cerebellum	chr17	74368212	74368279	0.298536	7	0.00058275	0.00022298	0.46358	0.16504	--	--	SLC7A4	PRODH	PRODH	--
hypothalamus-VS-cerebellum	chr17	74389276	74389575	0.222792	13	2.6729e-05	0.0091921	0.39215	0.16936	--	--	--	PRODH	PRODH	--
hypothalamus-VS-cerebellum	chr17	74389860	74390107	0.15162	12	0.0001028	0.0050928	0.3015	0.14988	--	--	--	PRODH	PRODH	--
hypothalamus-VS-cerebellum	chr17	74392031	74392549	0.150355	9	0.018758	0.015254	0.51171	0.36136	--	--	--	PRODH	PRODH	MZT2B
hypothalamus-VS-cerebellum	chr17	74402428	74402515	0.209332	5	0.0079365	0.010496	0.43539	0.22606	--	--	SMPD4	PRODH	PRODH	--
hypothalamus-VS-cerebellum	chr17	74403956	74404663	0.164475	13	0.00038402	0.0022691	0.33419	0.16971	--	--	SMPD4	PRODH,SMPD4	PRODH	--
hypothalamus-VS-cerebellum	chr17	74406482	74406984	-0.131264	5	0.0079365	0.0028376	0.12861	0.25988	--	--	--	PRODH,SMPD4	PRODH	--
hypothalamus-VS-cerebellum	chr17	74409961	74410009	0.198432	5	0.015873	0.022814	0.38617	0.18774	--	--	--	PRODH,SMPD4	PRODH	--
hypothalamus-VS-cerebellum	chr17	74411080	74412426	0.215017	35	8.9396e-09	3.3606e-07	0.41735	0.20233	--	--	SMPD4	PRODH,SMPD4	PRODH,SMPD4	--
hypothalamus-VS-cerebellum	chr17	74412902	74412942	0.229745	5	0.0079365	0.0027346	0.39796	0.16822	--	--	--	PRODH	PRODH	SMPD4
hypothalamus-VS-cerebellum	chr17	74414219	74414292	0.2855	6	0.0021645	0.0014434	0.50415	0.21865	--	--	--	PRODH	PRODH	SMPD4
hypothalamus-VS-cerebellum	chr17	74424148	74424294	0.117589	7	0.002331	0.0026812	0.36169	0.2441	--	--	--	PRODH	PRODH	MED15
hypothalamus-VS-cerebellum	chr17	74431956	74432098	0.104855	5	0.0079365	0.0060651	0.21602	0.11117	--	--	MED15	PRODH	PRODH	--
hypothalamus-VS-cerebellum	chr17	74450700	74450871	0.144678	8	0.0006216	0.017289	0.24724	0.10256	--	--	--	PRODH,MED15	--	--
hypothalamus-VS-cerebellum	chr17	74462139	74462264	0.214582	7	0.0040793	0.019781	0.41829	0.20371	--	--	MED15	--	--	--
hypothalamus-VS-cerebellum	chr17	74476522	74477204	0.169523	16	0.0093078	0.0016435	0.47195	0.30243	--	--	--	MED15	--	--
hypothalamus-VS-cerebellum	chr17	74506799	74507030	0.257235	9	4.1135e-05	0.00037557	0.45166	0.19443	--	--	--	KLHL22	--	--
hypothalamus-VS-cerebellum	chr17	74534805	74534990	0.258127	5	0.0079365	0.022384	0.33401	0.07588	--	--	--	--	--	--
hypothalamus-VS-cerebellum	chr17	74562090	74562190	0.377317	5	0.0079365	0.011954	0.5382	0.16089	--	--	--	ZNF74	--	--
hypothalamus-VS-cerebellum	chr17	74582174	74582446	0.177726	9	0.00049362	0.0023623	0.31758	0.13985	--	--	DGCR2	--	--	--
hypothalamus-VS-cerebellum	chr17	74582451	74582600	0.128925	7	0.0040793	0.015232	0.35229	0.22337	--	--	--	DGCR2	--	--
hypothalamus-VS-cerebellum	chr17	74582658	74582735	0.199356	5	0.0079365	0.0015759	0.51462	0.31527	--	--	--	DGCR2	--	--
hypothalamus-VS-cerebellum	chr17	74586642	74586981	0.239415	13	0.00038402	0.018993	0.41157	0.17216	--	--	--	DGCR2	--	--
hypothalamus-VS-cerebellum	chr17	74608676	74608735	0.187587	5	0.0079365	0.0032231	0.43709	0.2495	--	--	TSSK1B	--	--	--
hypothalamus-VS-cerebellum	chr17	74608795	74608841	0.126029	5	0.031746	0.014294	0.41131	0.28528	--	--	TSSK1B	--	--	--
hypothalamus-VS-cerebellum	chr17	74614760	74614863	0.155973	5	0.015873	0.013033	0.29475	0.13878	--	--	ESS2	--	--	--
hypothalamus-VS-cerebellum	chr17	74615292	74615400	0.267336	7	0.00058275	0.0057199	0.45385	0.18651	--	--	ESS2	--	--	--
hypothalamus-VS-cerebellum	chr17	74615450	74615635	0.125696	8	0.0003108	0.0058755	0.2603	0.13461	--	--	--	ESS2	--	--
hypothalamus-VS-cerebellum	chr17	74616539	74616591	0.144992	5	0.015873	0.046829	0.27068	0.12569	--	--	--	ESS2	--	--
hypothalamus-VS-cerebellum	chr17	74650433	74650545	0.335778	5	0.0079365	0.012328	0.63359	0.29781	--	--	--	--	--	--
hypothalamus-VS-cerebellum	chr17	74671652	74671903	0.175057	5	0.031746	0.037133	0.22204	0.046982	--	--	--	--	--	--
hypothalamus-VS-cerebellum	chr17	74683263	74683427	0.176757	5	0.015873	0.025134	0.33237	0.15561	--	--	--	--	--	--
hypothalamus-VS-cerebellum	chr17	74685770	74685898	0.391054	5	0.0079365	0.0042913	0.61149	0.22044	--	--	--	--	--	--
hypothalamus-VS-cerebellum	chr17	74694242	74694403	0.179402	9	4.1135e-05	0.00029436	0.33511	0.15571	--	--	--	--	--	--
hypothalamus-VS-cerebellum	chr17	74695751	74696011	0.222064	7	0.002331	0.017395	0.4079	0.18583	--	--	--	--	--	--
hypothalamus-VS-cerebellum	chr17	74765666	74765778	0.135497	6	0.004329	0.01415	0.33598	0.20048	--	--	--	--	--	--
hypothalamus-VS-cerebellum	chr17	74801180	74801557	0.207088	6	0.0021645	0.0014667	0.41738	0.2103	--	--	--	--	--	--
hypothalamus-VS-cerebellum	chr17	74808063	74808160	0.164428	7	0.011072	0.04462	0.41302	0.2486	--	--	SEPTIN5	--	--	--
hypothalamus-VS-cerebellum	chr17	74808470	74808526	0.179983	5	0.0079365	0.038262	0.39869	0.21871	--	--	SEPTIN5	--	--	--
hypothalamus-VS-cerebellum	chr17	74851501	74852431	0.131469	11	0.0083296	0.046359	0.31037	0.1789	--	--	GNB1L	--	GNB1L	GNB1L
hypothalamus-VS-cerebellum	chr17	74861211	74861472	0.275462	5	0.0079365	0.00072045	0.50349	0.22803	--	--	--	GNB1L	--	--
hypothalamus-VS-cerebellum	chr17	74874819	74875212	0.16256	7	0.006993	0.0094334	0.35156	0.189	--	GNB1L	--	GNB1L	--	--
hypothalamus-VS-cerebellum	chr17	74876853	74877203	0.237516	11	0.00039408	0.012192	0.45429	0.21678	--	GNB1L	--	GNB1L	--	--
hypothalamus-VS-cerebellum	chr17	74888270	74888663	0.162486	5	0.0079365	0.0025093	0.35796	0.19547	--	--	--	TXNRD2	--	--
hypothalamus-VS-cerebellum	chr17	74894168	74894211	0.280431	6	0.0021645	0.0040338	0.4215	0.14107	--	--	--	TXNRD2	--	--
hypothalamus-VS-cerebellum	chr17	74895296	74895405	0.168292	5	0.015873	0.010607	0.42526	0.25696	--	--	--	TXNRD2	--	--
hypothalamus-VS-cerebellum	chr17	74899358	74899551	0.109774	9	0.00028795	0.0068876	0.2653	0.15553	--	--	--	TXNRD2	--	--
hypothalamus-VS-cerebellum	chr17	74907861	74907954	0.163161	5	0.015873	0.017891	0.30267	0.13951	--	--	--	TXNRD2	--	--
hypothalamus-VS-cerebellum	chr17	74912740	74913050	0.134887	17	0.00041483	0.0051261	0.37633	0.24144	--	--	TXNRD2	TXNRD2	--	--
hypothalamus-VS-cerebellum	chr17	74924555	74924589	0.136323	5	0.0079365	0.014753	0.29414	0.15782	--	--	--	COMT	COMT	--
hypothalamus-VS-cerebellum	chr17	74924601	74924886	0.282314	5	0.031746	0.012791	0.39949	0.11718	--	--	--	COMT	COMT	--
hypothalamus-VS-cerebellum	chr17	74932114	74932366	0.172035	11	0.003181	0.01329	0.37232	0.20028	--	--	ARVCF	ARVCF	--	--
hypothalamus-VS-cerebellum	chr17	74932389	74932770	0.219376	7	0.00058275	0.0017207	0.42659	0.20721	--	--	ARVCF	ARVCF	--	--
hypothalamus-VS-cerebellum	chr17	74932796	74932900	0.194278	8	0.028127	0.002373	0.50697	0.31269	--	--	--	ARVCF	--	--
hypothalamus-VS-cerebellum	chr17	74935194	74935498	0.158499	5	0.0079365	0.010323	0.34476	0.18626	--	--	ARVCF	ARVCF	--	--
hypothalamus-VS-cerebellum	chr17	74936016	74936106	0.235224	5	0.0079365	0.013582	0.38544	0.15022	--	--	--	ARVCF	--	--
hypothalamus-VS-cerebellum	chr17	74936597	74936687	0.106138	8	0.0001554	0.00094376	0.22988	0.12374	--	--	ARVCF	--	--	--
hypothalamus-VS-cerebellum	chr17	74937396	74937578	0.212046	7	0.00058275	0.0061322	0.47671	0.26466	--	--	--	ARVCF	--	--
hypothalamus-VS-cerebellum	chr17	74938098	74938746	0.201522	35	1.7787e-08	5.6293e-05	0.43113	0.22961	--	--	ARVCF	ARVCF	--	--
hypothalamus-VS-cerebellum	chr17	74950910	74951838	0.1155	15	0.0034534	0.022996	0.27868	0.16318	--	--	--	--	--	--
hypothalamus-VS-cerebellum	chr17	74954089	74954166	0.139832	5	0.0079365	0.0010347	0.27465	0.13481	--	--	--	--	--	--
hypothalamus-VS-cerebellum	chr17	74954724	74955021	0.137508	12	7.1741e-05	0.0024315	0.32199	0.18448	--	--	--	--	--	--
hypothalamus-VS-cerebellum	chr17	74964551	74964615	0.204113	5	0.031746	0.042681	0.44662	0.24251	--	--	--	--	--	--
hypothalamus-VS-cerebellum	chr17	74964650	74964826	0.192417	5	0.015873	0.013086	0.45164	0.25922	--	--	--	--	--	--
hypothalamus-VS-cerebellum	chr17	74967153	74967261	0.292235	6	0.0021645	0.00031249	0.43635	0.14412	TANGO2	--	--	--	--	MIR185
hypothalamus-VS-cerebellum	chr17	74981507	74981911	0.176415	5	0.0079365	0.023288	0.31509	0.13868	--	--	TANGO2	--	TANGO2	--
hypothalamus-VS-cerebellum	chr17	74987149	74987182	0.425213	5	0.0079365	0.0061044	0.65151	0.2263	MIR1306,DGCR8	--	--	--	--	--
hypothalamus-VS-cerebellum	chr17	74989740	74989839	-0.113587	7	0.0040793	0.017745	0.14561	0.2592	--	--	--	DGCR8	--	MIR1306
hypothalamus-VS-cerebellum	chr17	74990558	74991048	0.24003	17	9.5999e-06	3.8175e-05	0.44657	0.20654	--	--	DGCR8	DGCR8	--	--
hypothalamus-VS-cerebellum	chr17	74991140	74991215	0.427266	6	0.0021645	0.00094964	0.62604	0.19878	--	--	--	DGCR8	--	--
hypothalamus-VS-cerebellum	chr17	74998841	74998947	0.182446	6	0.015152	0.040501	0.37714	0.19469	--	--	DGCR8	--	--	--
hypothalamus-VS-cerebellum	chr17	74999309	74999749	0.199022	10	2.165e-05	0.00013351	0.38209	0.18307	--	--	--	DGCR8	--	--
hypothalamus-VS-cerebellum	chr17	75003128	75003322	0.230938	5	0.031746	0.034806	0.5263	0.29536	--	--	--	--	--	DGCR8
hypothalamus-VS-cerebellum	chr17	75004200	75004449	0.171258	10	0.035463	0.012894	0.44007	0.26881	--	--	--	--	--	--
hypothalamus-VS-cerebellum	chr17	75009749	75009821	0.170952	9	0.00016454	0.00032456	0.3486	0.17765	--	--	--	RANBP1	--	--
hypothalamus-VS-cerebellum	chr17	75041179	75041254	0.135228	7	0.0040793	0.0024167	0.29402	0.15879	--	--	--	--	--	--
hypothalamus-VS-cerebellum	chr17	75042823	75043748	0.211305	22	2.9966e-06	3.1711e-06	0.46791	0.2566	--	--	--	--	--	--
hypothalamus-VS-cerebellum	chr17	75052031	75052483	0.239808	8	0.0006216	0.034819	0.50724	0.26743	--	--	--	--	--	--
hypothalamus-VS-cerebellum	chr17	75053668	75054002	0.218121	5	0.0079365	0.0046867	0.31873	0.10061	--	--	--	--	--	--
hypothalamus-VS-cerebellum	chr17	75055137	75056229	0.170146	29	3.4067e-05	0.00041227	0.44066	0.27051	--	--	--	--	--	--
hypothalamus-VS-cerebellum	chr17	75060955	75061139	0.308315	5	0.0079365	0.011435	0.5905	0.28219	--	--	--	--	--	--
hypothalamus-VS-cerebellum	chr17	75070658	75070895	0.133089	7	0.011072	0.0035702	0.32673	0.19364	--	--	--	--	--	--
hypothalamus-VS-cerebellum	chr17	75072283	75072343	0.235166	6	0.004329	0.043837	0.53274	0.29758	--	--	--	--	--	--
hypothalamus-VS-cerebellum	chr17	75076480	75076604	0.220734	5	0.015873	0.017131	0.40915	0.18842	--	--	--	--	--	--
hypothalamus-VS-cerebellum	chr17	75082935	75083641	0.150213	11	0.00055285	0.023683	0.3829	0.23269	--	--	--	--	--	--
hypothalamus-VS-cerebellum	chr17	75095886	75096134	0.267832	8	0.0001554	0.00069604	0.41343	0.1456	--	--	--	--	--	--
hypothalamus-VS-cerebellum	chr17	75098368	75098710	0.190216	5	0.0079365	0.012459	0.38213	0.19191	--	--	--	--	--	--
hypothalamus-VS-cerebellum	chr17	75103133	75103594	0.105367	27	0.00022115	0.00033713	0.34629	0.24092	--	--	--	--	--	--
hypothalamus-VS-cerebellum	chr17	75103605	75103652	0.289292	5	0.0079365	0.0047308	0.48781	0.19852	--	--	--	--	--	--
hypothalamus-VS-cerebellum	chr17	75103877	75103995	0.168606	5	0.0079365	0.00092687	0.31442	0.14581	--	--	--	--	--	--
hypothalamus-VS-cerebellum	chr17	75107446	75107563	0.195682	5	0.015873	0.048547	0.40528	0.2096	--	--	--	--	--	--
hypothalamus-VS-cerebellum	chr17	75107609	75108100	0.12434	8	0.004662	0.036151	0.30273	0.17839	--	--	--	--	--	--
hypothalamus-VS-cerebellum	chr17	75110535	75111205	0.199198	21	2.0089e-05	0.0015234	0.40588	0.20668	--	--	--	--	--	--
hypothalamus-VS-cerebellum	chr17	75131413	75132064	0.108215	13	0.011975	0.0096581	0.32328	0.21506	--	--	--	--	--	--
hypothalamus-VS-cerebellum	chr17	75133005	75133296	0.158529	8	0.014763	0.044594	0.3559	0.19737	--	--	--	--	--	--
hypothalamus-VS-cerebellum	chr18	1330974	1331103	0.336171	5	0.0079365	0.012375	0.60765	0.27147	--	--	--	--	--	--
hypothalamus-VS-cerebellum	chr18	1468251	1468293	0.149611	5	0.0079365	0.009851	0.34353	0.19392	--	--	--	VAC14	--	--
hypothalamus-VS-cerebellum	chr18	1474463	1474524	0.247859	6	0.0021645	0.0021619	0.52118	0.27332	--	--	--	VAC14	--	--
hypothalamus-VS-cerebellum	chr18	1488963	1489260	0.191575	5	0.0079365	0.014776	0.45112	0.25955	--	--	--	VAC14	--	--
hypothalamus-VS-cerebellum	chr18	1517814	1518148	0.173568	20	0.00065366	0.024533	0.50601	0.33244	--	--	VAC14	VAC14	--	--
hypothalamus-VS-cerebellum	chr18	1518183	1518260	0.503105	5	0.0079365	0.005962	0.66257	0.15946	--	--	--	VAC14	--	--
hypothalamus-VS-cerebellum	chr18	1531167	1531312	0.212538	7	0.011072	0.01431	0.37018	0.15764	--	--	--	--	--	--
hypothalamus-VS-cerebellum	chr18	1544996	1545037	0.162465	5	0.0079365	0.022555	0.40477	0.2423	--	--	--	--	--	--
hypothalamus-VS-cerebellum	chr18	1545390	1545591	0.186858	10	0.00072528	0.027456	0.37005	0.18319	--	--	--	--	--	--
hypothalamus-VS-cerebellum	chr18	1553918	1554001	0.138378	5	0.0079365	0.013918	0.30306	0.16468	--	--	IL34	--	--	--
hypothalamus-VS-cerebellum	chr18	1685938	1686128	0.159541	11	0.003181	0.0055405	0.36308	0.20354	--	--	--	FCSK	--	--
hypothalamus-VS-cerebellum	chr18	1773838	1773923	0.168957	6	0.008658	0.0018298	0.30435	0.13539	--	--	--	DDX19A	--	--
hypothalamus-VS-cerebellum	chr18	1774394	1774448	0.1404	5	0.0079365	0.047479	0.36731	0.22691	--	--	--	DDX19A	--	--
hypothalamus-VS-cerebellum	chr18	1800191	1800425	0.134745	7	0.011072	0.03882	0.34578	0.21104	--	--	--	DDX19B	--	--
hypothalamus-VS-cerebellum	chr18	2435124	2435363	0.338951	10	0.00105	0.014968	0.57911	0.24016	--	--	--	ZNRF1	--	--
hypothalamus-VS-cerebellum	chr18	2481212	2481660	0.215197	7	0.006993	0.041368	0.44574	0.23055	--	--	--	ZNRF1	--	--
hypothalamus-VS-cerebellum	chr18	2621413	2621464	-0.154251	5	0.0079365	0.0052372	0.063834	0.21808	--	--	--	BCAR1	--	--
hypothalamus-VS-cerebellum	chr18	2629022	2629216	-0.156798	5	0.015873	0.041388	0.14471	0.30151	--	--	--	--	--	--
hypothalamus-VS-cerebellum	chr18	2629783	2629961	-0.115216	5	0.031746	0.012923	0.15169	0.2669	--	--	--	--	--	--
hypothalamus-VS-cerebellum	chr18	2867031	2867171	0.160634	9	0.0077746	0.020145	0.43734	0.27671	--	--	CHST6	--	--	--
hypothalamus-VS-cerebellum	chr18	2867189	2867389	0.167751	8	0.006993	0.033907	0.35086	0.1831	--	--	CHST6	--	--	--
hypothalamus-VS-cerebellum	chr18	4449447	4449660	0.120552	14	0.002821	0.027573	0.27544	0.15489	--	--	MON1B	MON1B	--	--
hypothalamus-VS-cerebellum	chr18	5116109	5116154	0.244377	5	0.0079365	0.00050471	0.49391	0.24953	--	--	--	VAT1L	--	--
hypothalamus-VS-cerebellum	chr18	5289750	5289866	0.218997	8	0.0029526	0.01609	0.42327	0.20427	--	--	--	WWOX	--	--
hypothalamus-VS-cerebellum	chr18	5430239	5430507	0.239202	5	0.015873	0.010732	0.35645	0.11725	--	--	--	WWOX	--	--
hypothalamus-VS-cerebellum	chr18	5594426	5594510	0.292085	5	0.0079365	0.01433	0.57074	0.27866	--	--	--	WWOX	--	--
hypothalamus-VS-cerebellum	chr18	5616298	5616377	0.14706	5	0.031746	0.010261	0.39487	0.24781	--	--	--	WWOX	--	--
hypothalamus-VS-cerebellum	chr18	5657869	5658203	0.264298	16	2.8709e-05	0.00018691	0.46319	0.19889	--	--	--	WWOX	--	--
hypothalamus-VS-cerebellum	chr18	5684673	5685029	0.188427	8	0.0006216	0.0078818	0.35338	0.16495	--	--	--	WWOX	--	--
hypothalamus-VS-cerebellum	chr18	5702792	5702825	0.37311	5	0.0079365	0.00068614	0.55	0.17689	--	--	--	WWOX	--	--
hypothalamus-VS-cerebellum	chr18	5712886	5712937	0.134496	5	0.0079365	0.017394	0.27368	0.13918	--	--	--	WWOX	--	--
hypothalamus-VS-cerebellum	chr18	5771382	5771523	0.210151	5	0.0079365	0.047746	0.44486	0.23471	--	--	--	WWOX	--	--
hypothalamus-VS-cerebellum	chr18	6123657	6123873	0.117037	7	0.017483	0.03762	0.28265	0.16562	--	--	--	WWOX	--	--
hypothalamus-VS-cerebellum	chr18	6268156	6268254	0.108852	5	0.0079365	0.0025693	0.25639	0.14754	--	--	--	--	--	--
hypothalamus-VS-cerebellum	chr18	7996466	7996661	0.196153	11	0.0083296	0.012952	0.38052	0.18436	--	--	--	GAN	--	--
hypothalamus-VS-cerebellum	chr18	8108848	8109111	0.219623	10	0.00020568	0.0042136	0.3189	0.099281	--	--	--	--	--	--
hypothalamus-VS-cerebellum	chr18	8133193	8133613	0.317457	7	0.00058275	0.00049263	0.66822	0.35076	--	--	--	--	--	--
hypothalamus-VS-cerebellum	chr18	8136217	8136272	-0.156232	5	0.015873	0.043696	0.091847	0.24808	--	--	--	--	--	--
hypothalamus-VS-cerebellum	chr18	8158049	8158083	0.163665	5	0.0079365	0.0035999	0.42081	0.25715	--	--	--	--	--	--
hypothalamus-VS-cerebellum	chr18	8167199	8167381	0.133173	11	0.0024467	0.025102	0.40347	0.2703	--	--	--	--	--	MIR2883
hypothalamus-VS-cerebellum	chr18	8189271	8189389	0.179233	7	0.006993	0.039787	0.45569	0.27645	--	--	--	--	--	--
hypothalamus-VS-cerebellum	chr18	8226072	8226152	0.154225	5	0.015873	0.025427	0.351	0.19677	--	--	--	--	--	--
hypothalamus-VS-cerebellum	chr18	8259708	8259774	0.160521	6	0.0021645	0.004558	0.34042	0.1799	--	--	--	--	--	--
hypothalamus-VS-cerebellum	chr18	8269752	8269966	0.187471	14	0.00067354	0.0042019	0.42259	0.23512	--	--	--	--	--	--
hypothalamus-VS-cerebellum	chr18	8436348	8436810	0.121375	6	0.025974	0.020035	0.35278	0.2314	--	--	--	--	--	--
hypothalamus-VS-cerebellum	chr18	10357265	10357308	0.195452	5	0.0079365	0.034162	0.52547	0.33002	--	--	--	SLC38A8	--	--
hypothalamus-VS-cerebellum	chr18	10405672	10406416	0.142248	18	0.00021415	0.0024077	0.29633	0.15408	--	--	MBTPS1	MBTPS1	--	--
hypothalamus-VS-cerebellum	chr18	11065524	11065633	0.368146	5	0.0079365	0.017252	0.56323	0.19508	--	--	--	--	--	--
hypothalamus-VS-cerebellum	chr18	11113678	11113829	0.122106	5	0.015873	0.041737	0.2747	0.1526	--	--	--	--	--	--
hypothalamus-VS-cerebellum	chr18	11324278	11324376	0.354894	5	0.0079365	0.0012384	0.5261	0.1712	--	--	--	--	--	--
hypothalamus-VS-cerebellum	chr18	11331607	11331872	0.202842	5	0.0079365	0.016969	0.42737	0.22453	--	--	--	--	--	--
hypothalamus-VS-cerebellum	chr18	11335842	11336231	0.209083	14	3.545e-05	0.00019717	0.42847	0.21938	--	--	--	--	--	--
hypothalamus-VS-cerebellum	chr18	11349603	11349718	0.187903	6	0.041126	0.012963	0.57527	0.38737	--	--	--	--	--	--
hypothalamus-VS-cerebellum	chr18	11359006	11359120	0.16708	5	0.031746	0.012648	0.39473	0.22765	--	--	--	--	--	--
hypothalamus-VS-cerebellum	chr18	11385038	11385579	0.179397	13	0.0015499	0.017954	0.40925	0.22985	--	--	--	--	--	--
hypothalamus-VS-cerebellum	chr18	11391112	11391274	0.133288	7	0.0011655	0.0016592	0.37177	0.23848	--	--	--	--	--	--
hypothalamus-VS-cerebellum	chr18	11394191	11394672	0.189716	5	0.031746	0.047329	0.41283	0.22312	--	--	--	--	--	--
hypothalamus-VS-cerebellum	chr18	11394691	11394723	0.177066	5	0.0079365	0.0028997	0.41145	0.23438	--	--	--	--	--	--
hypothalamus-VS-cerebellum	chr18	11406324	11406389	0.170554	5	0.0079365	0.019782	0.41853	0.24798	--	--	--	--	--	--
hypothalamus-VS-cerebellum	chr18	11422386	11422521	0.181268	10	0.00072528	0.00097329	0.48589	0.30462	--	--	--	--	--	--
hypothalamus-VS-cerebellum	chr18	11476350	11476772	0.273084	5	0.0079365	0.0020403	0.51969	0.2466	--	--	--	--	--	--
hypothalamus-VS-cerebellum	chr18	11501412	11501463	0.211762	5	0.0079365	0.00056244	0.43645	0.22469	--	--	--	--	--	--
hypothalamus-VS-cerebellum	chr18	11533696	11534051	0.123305	5	0.0079365	0.003965	0.32135	0.19804	--	--	--	--	--	--
hypothalamus-VS-cerebellum	chr18	11544570	11544870	0.281306	12	0.00085794	0.0052455	0.53654	0.25523	--	--	--	--	--	--
hypothalamus-VS-cerebellum	chr18	11561902	11561988	0.18286	6	0.008658	0.040956	0.38702	0.20416	--	--	--	--	--	--
hypothalamus-VS-cerebellum	chr18	11649116	11649192	0.186984	10	0.00048713	0.0059706	0.51991	0.33293	--	--	--	--	--	--
hypothalamus-VS-cerebellum	chr18	11654743	11655013	0.204348	10	0.0015047	0.0029962	0.38165	0.1773	--	--	--	--	--	--
hypothalamus-VS-cerebellum	chr18	11660863	11661075	0.451179	5	0.0079365	0.010681	0.66726	0.21609	--	--	--	--	--	--
hypothalamus-VS-cerebellum	chr18	11665086	11665153	0.233933	5	0.0079365	0.0027597	0.47829	0.24436	--	--	--	--	--	--
hypothalamus-VS-cerebellum	chr18	11668764	11668801	0.35526	5	0.0079365	0.021321	0.75471	0.39945	--	--	--	--	--	--
hypothalamus-VS-cerebellum	chr18	11669179	11669413	0.249753	13	3.6536e-06	7.739e-05	0.40825	0.1585	--	--	--	--	--	--
hypothalamus-VS-cerebellum	chr18	11669929	11670033	0.234395	7	0.006993	0.019703	0.51988	0.28548	--	--	--	--	--	--
hypothalamus-VS-cerebellum	chr18	12038559	12038658	0.142868	5	0.031746	0.030908	0.35049	0.20762	--	--	--	--	--	--
hypothalamus-VS-cerebellum	chr18	12073821	12073973	0.191142	5	0.015873	0.036423	0.42995	0.23881	--	--	--	--	--	--
hypothalamus-VS-cerebellum	chr18	12244327	12244382	0.164978	5	0.0079365	0.015982	0.34635	0.18137	--	--	--	--	--	--
hypothalamus-VS-cerebellum	chr18	12266081	12266425	0.24421	13	5.2305e-05	0.0045784	0.46188	0.21767	--	--	--	--	--	--
hypothalamus-VS-cerebellum	chr18	12319499	12319556	0.276797	5	0.0079365	0.0042106	0.50358	0.22678	--	--	--	--	--	--
hypothalamus-VS-cerebellum	chr18	12975187	12975357	0.225923	8	0.0001554	0.0010605	0.43249	0.20657	--	--	--	--	--	--
hypothalamus-VS-cerebellum	chr18	12991728	12991820	0.344925	5	0.0079365	0.00078953	0.56753	0.22261	--	--	--	--	--	--
hypothalamus-VS-cerebellum	chr18	13037959	13038011	0.209752	5	0.0079365	0.0039054	0.36866	0.15891	--	--	ZCCHC14	--	--	--
hypothalamus-VS-cerebellum	chr18	13038432	13039022	0.196627	20	2.2039e-06	1.6372e-05	0.41923	0.2226	--	--	ZCCHC14	ZCCHC14	--	--
hypothalamus-VS-cerebellum	chr18	13069049	13069088	0.17488	5	0.015873	0.010705	0.36413	0.18925	--	--	--	ZCCHC14	--	--
hypothalamus-VS-cerebellum	chr18	13201216	13201466	0.26116	6	0.004329	0.014231	0.43173	0.17057	--	--	--	JPH3	--	--
hypothalamus-VS-cerebellum	chr18	13239465	13239595	0.220857	5	0.0079365	0.0041419	0.43291	0.21206	--	--	--	JPH3	--	--
hypothalamus-VS-cerebellum	chr18	13258390	13258588	0.177886	5	0.0079365	0.0076405	0.36214	0.18426	--	--	JPH3	--	--	--
hypothalamus-VS-cerebellum	chr18	13461494	13461762	0.138982	5	0.031746	0.040879	0.29048	0.1515	--	--	--	BANP	--	--
hypothalamus-VS-cerebellum	chr18	13586046	13586255	0.137504	5	0.015873	0.037925	0.31334	0.17584	--	--	--	--	--	--
hypothalamus-VS-cerebellum	chr18	13599140	13599601	0.196653	8	0.006993	0.036186	0.3214	0.12475	--	--	--	--	--	--
hypothalamus-VS-cerebellum	chr18	13604297	13604440	0.181562	7	0.011072	0.039796	0.32911	0.14755	--	--	--	--	--	--
hypothalamus-VS-cerebellum	chr18	13606290	13606452	0.255254	5	0.0079365	0.026466	0.47874	0.22349	--	--	--	--	--	--
hypothalamus-VS-cerebellum	chr18	13743624	13743957	0.198907	12	0.0023164	0.020561	0.43218	0.23327	--	--	--	--	--	--
hypothalamus-VS-cerebellum	chr18	13743999	13744419	0.103617	14	0.0020805	0.0041466	0.33437	0.23075	--	--	--	--	--	--
hypothalamus-VS-cerebellum	chr18	13786931	13787255	0.226135	8	0.004662	0.016221	0.40468	0.17854	--	--	--	--	--	--
hypothalamus-VS-cerebellum	chr18	13793939	13794472	0.219274	11	0.0014006	0.013239	0.45967	0.24039	--	--	--	--	--	--
hypothalamus-VS-cerebellum	chr18	13799526	13799752	0.181299	5	0.031746	0.011305	0.40706	0.22576	--	--	--	--	--	--
hypothalamus-VS-cerebellum	chr18	13810686	13810837	0.143971	5	0.0079365	0.0054418	0.34416	0.20019	--	--	--	--	--	--
hypothalamus-VS-cerebellum	chr18	13825337	13825466	0.161764	8	0.0006216	0.00568	0.36927	0.2075	--	--	--	--	--	--
hypothalamus-VS-cerebellum	chr18	13826500	13826529	-0.167871	5	0.0079365	0.016193	0.24583	0.4137	--	--	--	--	--	--
hypothalamus-VS-cerebellum	chr18	13958571	13958900	0.130834	5	0.015873	0.04135	0.36045	0.22962	--	--	--	--	--	SNAI3
hypothalamus-VS-cerebellum	chr18	13983376	13983558	0.195039	5	0.0079365	0.012202	0.33983	0.14479	--	--	--	CTU2	--	--
hypothalamus-VS-cerebellum	chr18	13988631	13988784	0.24861	6	0.004329	0.0083385	0.32737	0.078757	--	--	--	--	--	--
hypothalamus-VS-cerebellum	chr18	14029250	14029539	0.290802	5	0.0079365	0.003473	0.46765	0.17685	--	--	--	--	--	--
hypothalamus-VS-cerebellum	chr18	14035381	14035840	0.165538	9	0.00028795	0.0032102	0.33716	0.17162	--	--	--	--	--	--
hypothalamus-VS-cerebellum	chr18	14069792	14069974	0.273257	5	0.0079365	0.0044213	0.43954	0.16629	--	--	--	GALNS	--	--
hypothalamus-VS-cerebellum	chr18	14073875	14074134	0.253853	5	0.0079365	0.0023419	0.46256	0.20871	--	--	--	GALNS	--	--
hypothalamus-VS-cerebellum	chr18	14099375	14099509	0.20403	9	4.1135e-05	0.00087626	0.37117	0.16714	--	--	--	--	--	--
hypothalamus-VS-cerebellum	chr18	14108087	14108370	0.22114	7	0.00058275	0.015387	0.41909	0.19795	--	--	--	--	--	--
hypothalamus-VS-cerebellum	chr18	14115866	14115994	0.153831	5	0.031746	0.046118	0.3813	0.22747	--	--	--	--	--	--
hypothalamus-VS-cerebellum	chr18	14254902	14255364	0.289049	17	5.1853e-05	0.00017829	0.5289	0.23985	--	--	ACSF3	--	--	--
hypothalamus-VS-cerebellum	chr18	14286703	14286810	0.190861	7	0.037879	0.016766	0.31378	0.12292	--	--	--	ACSF3	--	--
hypothalamus-VS-cerebellum	chr18	14319804	14319976	0.152039	7	0.0011655	0.0054237	0.32957	0.17753	--	--	--	CDH15	--	SLC22A31
hypothalamus-VS-cerebellum	chr18	14371917	14371963	0.257874	5	0.0079365	0.0104	0.38159	0.12372	--	--	--	--	--	--
hypothalamus-VS-cerebellum	chr18	14375334	14375449	0.261645	5	0.0079365	0.0050343	0.4347	0.17306	--	--	--	--	--	--
hypothalamus-VS-cerebellum	chr18	14377987	14378142	0.175877	8	0.0010878	0.0062458	0.41189	0.23601	--	--	--	--	--	--
hypothalamus-VS-cerebellum	chr18	14378484	14378799	0.148843	8	0.0003108	0.0026393	0.37696	0.22812	--	--	--	--	--	--
hypothalamus-VS-cerebellum	chr18	14520491	14520803	0.203802	15	0.00039057	0.00091945	0.40948	0.20568	--	--	SPG7	--	--	--
hypothalamus-VS-cerebellum	chr18	14570651	14570710	0.150675	5	0.015873	0.012336	0.38792	0.23725	--	--	--	--	--	--
hypothalamus-VS-cerebellum	chr18	14627100	14627225	0.135913	5	0.0079365	0.00077516	0.21186	0.075947	--	--	--	--	--	--
hypothalamus-VS-cerebellum	chr18	14639929	14640235	0.203031	5	0.0079365	0.0026443	0.43606	0.23303	--	--	--	--	--	--
hypothalamus-VS-cerebellum	chr18	14649278	14649441	0.168986	8	0.0010878	0.00069756	0.37031	0.20132	--	--	FANCA	--	FANCA	--
hypothalamus-VS-cerebellum	chr18	14720252	14720356	0.111328	5	0.015873	0.011327	0.35512	0.24379	--	--	SPIRE2	SPIRE2	--	--
hypothalamus-VS-cerebellum	chr18	14786174	14786383	0.152041	7	0.017483	0.017736	0.39767	0.24563	--	--	DEF8	DEF8	--	--
hypothalamus-VS-cerebellum	chr18	15137478	15137552	0.137948	5	0.015873	0.038341	0.2944	0.15645	--	--	--	--	--	--
hypothalamus-VS-cerebellum	chr18	18051285	18051653	0.249457	5	0.0079365	0.022784	0.47003	0.22057	--	--	--	ZNF423	--	--
hypothalamus-VS-cerebellum	chr18	18192599	18192738	0.21931	7	0.00058275	0.0016338	0.29726	0.077946	--	--	ZNF423	--	--	--
hypothalamus-VS-cerebellum	chr18	18193200	18193454	0.313507	5	0.0079365	0.010465	0.33676	0.023253	--	--	ZNF423	--	--	--
hypothalamus-VS-cerebellum	chr18	18217852	18218217	0.202185	8	0.010412	0.0061173	0.43874	0.23655	--	--	--	ZNF423	--	--
hypothalamus-VS-cerebellum	chr18	18295140	18295436	0.144619	6	0.004329	0.019352	0.39857	0.25395	--	--	--	ZNF423	--	--
hypothalamus-VS-cerebellum	chr18	18295792	18296224	0.202443	10	0.0001299	0.017043	0.39542	0.19298	--	--	--	ZNF423	--	--
hypothalamus-VS-cerebellum	chr18	18322325	18322379	0.23756	6	0.0021645	0.00035016	0.43348	0.19592	--	--	--	ZNF423	--	--
hypothalamus-VS-cerebellum	chr18	18330453	18330515	0.297844	5	0.0079365	0.0066664	0.49417	0.19632	--	--	--	ZNF423	--	--
hypothalamus-VS-cerebellum	chr18	18344426	18344476	0.147269	5	0.0079365	0.048049	0.51527	0.368	--	--	--	ZNF423	--	--
hypothalamus-VS-cerebellum	chr18	18441476	18441601	0.238066	5	0.0079365	0.0059672	0.45628	0.21822	--	--	--	--	--	--
hypothalamus-VS-cerebellum	chr18	19114060	19114352	0.264045	6	0.025974	0.037453	0.46527	0.20122	--	--	NKD1	NKD1	--	--
hypothalamus-VS-cerebellum	chr18	23842470	23842523	0.140375	5	0.031746	0.044	0.30263	0.16225	--	--	MMP2	--	--	--
hypothalamus-VS-cerebellum	chr18	24333384	24333731	0.33701	15	1.7629e-05	0.00042496	0.60034	0.26333	--	--	--	AMFR	--	--
hypothalamus-VS-cerebellum	chr18	24359119	24359160	0.192031	5	0.0079365	0.0015798	0.39489	0.20286	--	--	GNAO1	--	--	--
hypothalamus-VS-cerebellum	chr18	25474305	25474388	0.241791	5	0.031746	0.0064113	0.41735	0.17556	--	--	--	--	--	--
hypothalamus-VS-cerebellum	chr18	25558320	25558436	0.130492	5	0.015873	0.018307	0.26069	0.1302	--	--	--	--	--	--
hypothalamus-VS-cerebellum	chr18	25584808	25584854	0.621423	5	0.0079365	0.048159	0.79943	0.17801	--	--	CCDC102A	--	--	--
hypothalamus-VS-cerebellum	chr18	25814213	25814267	0.294226	5	0.0079365	0.0035721	0.37612	0.081896	--	--	--	--	--	--
hypothalamus-VS-cerebellum	chr18	25832179	25832269	0.18057	9	4.1135e-05	0.014272	0.38587	0.2053	--	--	--	--	--	--
hypothalamus-VS-cerebellum	chr18	25834405	25834456	0.106044	5	0.0079365	0.0047388	0.26758	0.16153	--	--	--	--	--	--
hypothalamus-VS-cerebellum	chr18	35345157	35345232	0.106863	7	0.006993	0.036746	0.34092	0.23406	--	--	GFOD2	--	--	--
hypothalamus-VS-cerebellum	chr18	36096297	36096584	0.100759	9	0.0077746	0.034546	0.27788	0.17713	--	--	--	CDH3	--	--
hypothalamus-VS-cerebellum	chr18	38467629	38467820	0.206479	5	0.0079365	0.0039367	0.27456	0.068077	--	--	--	--	--	--
hypothalamus-VS-cerebellum	chr18	40829144	40829414	0.141162	6	0.041126	0.0060174	0.38259	0.24143	--	--	--	--	--	--
hypothalamus-VS-cerebellum	chr18	41035967	41036001	-0.161303	5	0.0079365	0.010394	0.2179	0.3792	--	--	--	--	--	--
hypothalamus-VS-cerebellum	chr18	41212695	41212881	0.154982	8	0.010412	0.035429	0.49527	0.34029	--	--	--	--	--	--
hypothalamus-VS-cerebellum	chr18	41988571	41988632	0.161879	5	0.0079365	0.0063911	0.32051	0.15863	--	--	--	--	--	--
hypothalamus-VS-cerebellum	chr18	42749398	42749577	0.163306	5	0.0079365	0.00097508	0.31391	0.1506	--	--	--	--	--	--
hypothalamus-VS-cerebellum	chr18	43845801	43846123	0.1926	14	0.00023709	0.00044034	0.40929	0.21669	--	--	--	--	--	SLC7A10
hypothalamus-VS-cerebellum	chr18	43847768	43847838	0.199466	5	0.0079365	0.0030754	0.37613	0.17666	--	--	--	SLC7A10	SLC7A10	--
hypothalamus-VS-cerebellum	chr18	44024832	44025396	0.198181	7	0.006993	0.040657	0.45483	0.25665	--	--	--	PEPD	--	--
hypothalamus-VS-cerebellum	chr18	44035567	44035686	0.107447	5	0.031746	0.034219	0.2931	0.18565	--	--	--	PEPD	--	--
hypothalamus-VS-cerebellum	chr18	44378488	44378711	0.183016	5	0.0079365	0.002756	0.38704	0.20402	--	--	CHST8	--	--	--
hypothalamus-VS-cerebellum	chr18	44417909	44418065	0.102783	5	0.0079365	0.016975	0.23836	0.13558	--	--	KCTD15	--	--	--
hypothalamus-VS-cerebellum	chr18	45971085	45971170	-0.126767	5	0.031746	0.0344	0.139	0.26577	HPN	--	--	--	--	SCN1B
hypothalamus-VS-cerebellum	chr18	45985218	45985331	0.101074	5	0.015873	0.041754	0.2106	0.10953	--	--	--	HPN	--	--
hypothalamus-VS-cerebellum	chr18	46162570	46162632	0.120875	5	0.031746	0.042572	0.39289	0.27201	--	--	LSR	--	--	--
hypothalamus-VS-cerebellum	chr18	46667865	46667919	0.100893	5	0.031746	0.045039	0.31821	0.21731	--	--	--	--	--	--
hypothalamus-VS-cerebellum	chr18	46820852	46820985	0.277516	11	3.4022e-05	0.0031561	0.51039	0.23287	--	--	LRFN3	--	--	--
hypothalamus-VS-cerebellum	chr18	46820987	46821421	0.124194	12	7.1741e-05	0.0023273	0.28808	0.16388	--	--	LRFN3	--	--	--
hypothalamus-VS-cerebellum	chr18	46825441	46825659	0.281969	5	0.0079365	0.010265	0.4841	0.20213	--	--	LRFN3	--	--	--
hypothalamus-VS-cerebellum	chr18	48141075	48141175	0.285681	9	0.0039901	0.0313	0.56346	0.27778	--	--	--	--	--	--
hypothalamus-VS-cerebellum	chr18	48183594	48183781	0.194387	5	0.015873	0.036928	0.47036	0.27597	--	--	--	--	--	--
hypothalamus-VS-cerebellum	chr18	48338753	48338783	0.290208	5	0.0079365	0.0011972	0.59114	0.30093	--	--	--	--	--	C18H19orf33
hypothalamus-VS-cerebellum	chr18	48687269	48687400	0.344837	7	0.00058275	0.0016533	0.73669	0.39186	--	--	--	ACTN4	--	--
hypothalamus-VS-cerebellum	chr18	49137644	49137760	0.176822	7	0.011072	0.043101	0.50989	0.33307	--	PAK4	--	PAK4	--	--
hypothalamus-VS-cerebellum	chr18	49154295	49154384	0.187206	5	0.0079365	0.0019444	0.47221	0.28501	--	PAK4	--	PAK4	--	--
hypothalamus-VS-cerebellum	chr18	49157297	49157555	0.180526	10	0.0068415	0.028602	0.44281	0.26228	--	PAK4	--	PAK4	--	--
hypothalamus-VS-cerebellum	chr18	49293652	49293825	0.197019	10	0.00105	0.013075	0.33765	0.14063	--	--	--	--	--	--
hypothalamus-VS-cerebellum	chr18	49374199	49374628	0.129993	10	0.011496	0.0025365	0.4296	0.29961	--	--	ZFP36	ZFP36	--	--
hypothalamus-VS-cerebellum	chr18	49381204	49381300	0.176089	7	0.00058275	0.0019337	0.28895	0.11286	--	--	--	--	--	--
hypothalamus-VS-cerebellum	chr18	49387311	49387463	0.162973	5	0.0079365	0.006681	0.40147	0.2385	--	--	--	--	--	--
hypothalamus-VS-cerebellum	chr18	49651822	49652081	0.130738	7	0.017483	0.036744	0.35289	0.22216	--	--	DYRK1B	--	--	--
hypothalamus-VS-cerebellum	chr18	49745737	49746086	0.338588	5	0.0079365	0.016266	0.60132	0.26273	--	--	--	--	--	--
hypothalamus-VS-cerebellum	chr18	49878874	49878937	0.462684	5	0.0079365	0.0035174	0.6295	0.16682	--	--	--	--	--	--
hypothalamus-VS-cerebellum	chr18	49881271	49881479	0.211239	5	0.0079365	0.010828	0.38109	0.16985	--	--	--	--	--	--
hypothalamus-VS-cerebellum	chr18	49905401	49905700	0.32504	5	0.0079365	0.019648	0.47772	0.15268	--	--	--	AKT2	--	--
hypothalamus-VS-cerebellum	chr18	49909733	49910184	0.257458	12	0.0001028	0.0024741	0.55436	0.2969	--	--	AKT2	AKT2	--	--
hypothalamus-VS-cerebellum	chr18	49941430	49941499	0.159115	7	0.017483	0.042869	0.48712	0.328	--	--	--	--	--	--
hypothalamus-VS-cerebellum	chr18	49965448	49966069	0.105921	15	0.019103	0.039803	0.32467	0.21875	--	--	C18H19orf47	C18H19orf47	--	--
hypothalamus-VS-cerebellum	chr18	50002575	50002683	0.32038	5	0.0079365	0.018038	0.55607	0.23569	--	--	PLD3	--	--	--
hypothalamus-VS-cerebellum	chr18	50258548	50258644	0.262762	5	0.0079365	0.0032248	0.47855	0.21579	--	--	--	--	--	--
hypothalamus-VS-cerebellum	chr18	50810207	50810286	0.232031	5	0.0079365	0.035	0.43825	0.20622	--	--	--	--	--	--
hypothalamus-VS-cerebellum	chr18	50834602	50834697	0.230108	5	0.0079365	0.011184	0.49176	0.26166	--	--	--	BCKDHA	--	--
hypothalamus-VS-cerebellum	chr18	51248047	51248509	0.237492	8	0.0006216	0.0062801	0.47999	0.2425	--	--	--	--	--	--
hypothalamus-VS-cerebellum	chr18	51257182	51257260	0.269922	5	0.0079365	0.0036019	0.42694	0.15701	--	--	--	--	--	--
hypothalamus-VS-cerebellum	chr18	51266095	51266201	0.157083	5	0.031746	0.016399	0.33839	0.18131	--	--	--	--	--	--
hypothalamus-VS-cerebellum	chr18	51299079	51299213	0.190821	10	0.018543	0.02774	0.40626	0.21544	--	--	TMEM145	--	--	--
hypothalamus-VS-cerebellum	chr18	51314221	51314342	0.205427	5	0.031746	0.044597	0.33609	0.13066	--	--	--	--	--	--
hypothalamus-VS-cerebellum	chr18	51317485	51317538	0.146899	5	0.031746	0.0099026	0.37562	0.22872	--	--	--	--	--	--
hypothalamus-VS-cerebellum	chr18	51333399	51333633	0.210096	8	0.010412	0.015701	0.37807	0.16797	--	--	--	--	--	--
hypothalamus-VS-cerebellum	chr18	51334636	51335819	0.129825	27	3.1735e-05	0.00032545	0.30204	0.17221	--	--	--	--	--	--
hypothalamus-VS-cerebellum	chr18	51352311	51352580	0.203978	5	0.0079365	0.014357	0.29441	0.090432	--	--	--	ERF	--	--
hypothalamus-VS-cerebellum	chr18	51375090	51375136	0.195668	5	0.031746	0.038088	0.3428	0.14713	--	--	ZNF526	--	--	--
hypothalamus-VS-cerebellum	chr18	51505291	51505326	0.364007	5	0.0079365	0.012873	0.58902	0.22501	--	--	ZNF574	--	--	--
hypothalamus-VS-cerebellum	chr18	51505641	51505817	0.20413	9	4.1135e-05	0.0022936	0.41836	0.21423	--	--	ZNF574	--	--	--
hypothalamus-VS-cerebellum	chr18	51595864	51596029	0.195026	8	0.0010878	0.0068632	0.33842	0.14339	--	--	--	--	--	--
hypothalamus-VS-cerebellum	chr18	51603336	51603408	0.247782	5	0.0079365	0.01272	0.36801	0.12023	--	--	--	--	--	--
hypothalamus-VS-cerebellum	chr18	51660335	51660383	0.15569	5	0.031746	0.038002	0.32394	0.16825	--	--	--	--	--	--
hypothalamus-VS-cerebellum	chr18	52169188	52169259	0.196618	5	0.031746	0.017694	0.47464	0.27802	--	--	--	ZNF428	--	--
hypothalamus-VS-cerebellum	chr18	52181113	52181344	0.248048	9	0.0027561	0.016047	0.52342	0.27537	--	--	--	--	--	--
hypothalamus-VS-cerebellum	chr18	52182178	52182226	0.153325	5	0.031746	0.013414	0.29311	0.13978	--	--	--	--	--	--
hypothalamus-VS-cerebellum	chr18	52273100	52273446	0.169282	7	0.006993	0.036737	0.42887	0.25958	--	--	SMG9	--	SMG9	--
hypothalamus-VS-cerebellum	chr18	53078892	53078942	0.233657	6	0.0021645	0.0039054	0.39288	0.15922	--	--	CLPTM1	--	--	--
hypothalamus-VS-cerebellum	chr18	53090849	53090928	0.179549	7	0.002331	0.043357	0.36269	0.18314	--	--	--	CLPTM1	--	--
hypothalamus-VS-cerebellum	chr18	53147700	53147959	0.201706	10	0.00032475	0.028146	0.3743	0.17259	--	--	CLASRP	CLASRP	--	--
hypothalamus-VS-cerebellum	chr18	53154044	53154236	0.181935	6	0.025974	0.019534	0.38358	0.20164	--	--	--	--	--	CLASRP,ZNF296
hypothalamus-VS-cerebellum	chr18	53193632	53193771	0.160641	5	0.031746	0.012166	0.39669	0.23605	--	--	--	PPP1R37	--	--
hypothalamus-VS-cerebellum	chr18	53206469	53207343	0.16273	10	0.005196	0.013236	0.47823	0.3155	--	--	PPP1R37	--	PPP1R37	--
hypothalamus-VS-cerebellum	chr18	53211631	53211669	0.20187	5	0.0079365	0.0051444	0.42052	0.21865	--	--	NKPD1	--	--	--
hypothalamus-VS-cerebellum	chr18	53222828	53223256	0.150276	11	0.0024467	0.002425	0.30606	0.15578	--	--	TRAPPC6A	TRAPPC6A	--	--
hypothalamus-VS-cerebellum	chr18	53407516	53407836	0.170209	5	0.0079365	0.00065725	0.41591	0.2457	--	--	KLC3	KLC3	--	ERCC2
hypothalamus-VS-cerebellum	chr18	53409168	53409329	0.156518	5	0.031746	0.019271	0.4087	0.25218	--	--	KLC3	--	--	ERCC2
hypothalamus-VS-cerebellum	chr18	53410504	53410610	0.235099	6	0.008658	0.01658	0.45437	0.21927	--	--	ERCC2	--	--	KLC3
hypothalamus-VS-cerebellum	chr18	53702836	53702888	0.167035	6	0.041126	0.042473	0.52448	0.35744	--	--	--	--	--	--
hypothalamus-VS-cerebellum	chr18	53772797	53773416	0.129156	26	0.0002183	0.0077514	0.32942	0.20027	--	--	--	--	--	--
hypothalamus-VS-cerebellum	chr18	54125240	54125650	0.195134	7	0.0011655	0.0089938	0.364	0.16886	--	--	CCDC8	--	--	--
hypothalamus-VS-cerebellum	chr18	54275718	54275961	0.24905	6	0.008658	0.00569	0.51663	0.26758	--	--	--	--	--	--
hypothalamus-VS-cerebellum	chr18	54492332	54492456	0.213167	7	0.011072	0.0054084	0.5481	0.33494	--	--	--	ARHGAP35	--	--
hypothalamus-VS-cerebellum	chr18	54497424	54497520	0.277649	5	0.0079365	0.0030979	0.48357	0.20592	--	--	ARHGAP35	--	ARHGAP35	--
hypothalamus-VS-cerebellum	chr18	54551141	54551422	0.16624	7	0.026224	0.044039	0.37395	0.20771	--	--	--	--	--	ZC3H4
hypothalamus-VS-cerebellum	chr18	54552643	54552662	0.115217	5	0.0079365	0.0091711	0.23684	0.12163	--	--	ZC3H4	--	--	--
hypothalamus-VS-cerebellum	chr18	54552844	54553109	0.340047	5	0.0079365	0.019575	0.571	0.23095	--	--	ZC3H4	--	--	--
hypothalamus-VS-cerebellum	chr18	54554939	54555003	0.175964	5	0.0079365	0.0040513	0.31022	0.13425	--	--	--	ZC3H4	--	--
hypothalamus-VS-cerebellum	chr18	54555139	54555229	0.300402	6	0.0021645	0.001377	0.55342	0.25302	--	--	ZC3H4	--	--	--
hypothalamus-VS-cerebellum	chr18	54573651	54574098	0.175415	19	0.0013895	0.011089	0.46208	0.28667	--	--	ZC3H4	--	--	--
hypothalamus-VS-cerebellum	chr18	54786937	54787111	0.221251	6	0.004329	0.013091	0.43057	0.20932	--	DHX34	DHX34	--	--	--
hypothalamus-VS-cerebellum	chr18	55042298	55042467	0.222636	7	0.011072	0.036221	0.43732	0.21469	--	--	--	--	--	--
hypothalamus-VS-cerebellum	chr18	55047988	55048292	0.227012	8	0.0006216	0.0058104	0.45693	0.22992	--	--	--	--	--	--
hypothalamus-VS-cerebellum	chr18	55062494	55062663	0.312454	7	0.006993	0.043691	0.57809	0.26563	--	--	--	--	--	--
hypothalamus-VS-cerebellum	chr18	55491529	55491586	0.171174	5	0.0079365	0.0067163	0.45311	0.28194	--	--	--	TMEM143	--	--
hypothalamus-VS-cerebellum	chr18	55615005	55615558	0.16798	19	0.00038941	0.0036915	0.37415	0.20617	--	--	--	--	--	--
[truncated: 15,328 more rows]
