# Supplementary material for: Genome-Wide DNA Methylation and Hydroxymethylation Changes Revealed Epigenetic Regulation of Neuromodulation and Myelination in Yak Hypothalamus
Source: Front Genet. 2021 Sep 27;12:592135. doi: 10.3389/fgene.2021.592135 (PMC8503545; doi:10.3389/fgene.2021.592135)
Supplement: Supplementary file 8 [file Table_7.XLSX]

## Sheet: Sheet1
Supplymentary table 7. GO and KEGG enriched terms for genes related DMRs or DhMRs in cattle
Group	Enrichment	Term	Category	Observed	Expected	FoldChange	rawP	adjP	Term_Name	GeneList
hypothalamus vs cerebellum	GO	GO:0005515	4194	751	518.909	1.44727	5.47227e-16	3.20128e-13	molecular_function:protein binding	BmuPB009951;BmuPB016695;BmuPB018163;BmuPB002209;BmuPB002719;BmuPB000111;BmuPB019003;BmuPB009568;BmuPB005860;BmuPB016176;BmuPB010623;BmuPB017104;BmuPB019814;BmuPB003111;BmuPB009903;BmuPB003100;BmuPB021461;BmuPB003065;BmuPB011500;BmuPB010398;BmuPB018087;BmuPB018276;BmuPB022458;BmuPB015211;BmuPB018577;BmuPB016750;BmuPB014937;BmuPB017672;BmuPB010074;BmuPB005410;BmuPB003134;BmuPB000440;BmuPB017906;Bmu…
		GO:0004672	503	133	62.2344	2.13708	1.31891e-12	5.14376e-10	molecular_function:protein kinase activity	BmuPB021480;BmuPB010996;BmuPB007917;BmuPB010201;BmuPB018351;BmuPB012704;BmuPB009915;BmuPB009120;BmuPB015624;BmuPB005852;BmuPB017070;BmuPB008076;BmuPB004386;BmuPB018130;BmuPB009568;BmuPB012201;BmuPB017538;BmuPB000999;BmuPB012454;BmuPB010995;BmuPB016418;BmuPB011517;BmuPB017523;BmuPB015212;BmuPB014010;BmuPB017104;BmuPB016546;BmuPB016976;BmuPB012886;BmuPB000574;BmuPB016631;BmuPB011393;BmuPB009672;Bmu…
		GO:0004713	415	111	51.3465	2.16178	4.2982e-11	1.25722e-08	molecular_function:protein tyrosine kinase activity	BmuPB007917;BmuPB010201;BmuPB018351;BmuPB009915;BmuPB009120;BmuPB015624;BmuPB005852;BmuPB008076;BmuPB004386;BmuPB018130;BmuPB009568;BmuPB012201;BmuPB017538;BmuPB000999;BmuPB012454;BmuPB011517;BmuPB017523;BmuPB015212;BmuPB014010;BmuPB017104;BmuPB016546;BmuPB016976;BmuPB012886;BmuPB011393;BmuPB009672;BmuPB011928;BmuPB010773;BmuPB006690;BmuPB007131;BmuPB015849;BmuPB006337;BmuPB009556;BmuPB014101;Bmu…
		GO:0006468	688	159	85.1238	1.86787	6.92382e-11	1.62017e-08	biological_process:protein phosphorylation	BmuPB001463;BmuPB010201;BmuPB018351;BmuPB012704;BmuPB009915;BmuPB017070;BmuPB008076;BmuPB004386;BmuPB007706;BmuPB009568;BmuPB017538;BmuPB000999;BmuPB003535;BmuPB010995;BmuPB011517;BmuPB015212;BmuPB005860;BmuPB017104;BmuPB012886;BmuPB000574;BmuPB016631;BmuPB011393;BmuPB009672;BmuPB011928;BmuPB006690;BmuPB015849;BmuPB016882;BmuPB006337;BmuPB014101;BmuPB000672;BmuPB018265;BmuPB005615;BmuPB010862;Bmu…
		GO:0005524	1643	287	203.283	1.41183	6.52932e-07	0.000109133	molecular_function:ATP binding	BmuPB009099;BmuPB013843;BmuPB001463;BmuPB009915;BmuPB006302;BmuPB005353;BmuPB004386;BmuPB008208;BmuPB009568;BmuPB007605;BmuPB000999;BmuPB003535;BmuPB011517;BmuPB013279;BmuPB005860;BmuPB017104;BmuPB000574;BmuPB011393;BmuPB019816;BmuPB009672;BmuPB012952;BmuPB013704;BmuPB012656;BmuPB004650;BmuPB008918;BmuPB003100;BmuPB000672;BmuPB003088;BmuPB006681;BmuPB003396;BmuPB010398;BmuPB013887;BmuPB006518;Bmu…
		GO:0035556	259	66	32.0452	2.05959	1.21029e-06	0.000157338	biological_process:intracellular signal transduction	BmuPB017685;BmuPB018163;BmuPB007900;BmuPB001425;BmuPB019881;BmuPB016394;BmuPB010950;BmuPB013849;BmuPB009644;BmuPB013786;BmuPB015630;BmuPB004403;BmuPB003111;BmuPB008822;BmuPB006681;BmuPB005697;BmuPB003746;BmuPB002658;BmuPB015778;BmuPB003565;BmuPB003164;BmuPB004744;BmuPB016559;BmuPB014151;BmuPB018385;BmuPB017665;BmuPB014892;BmuPB014937;BmuPB016562;BmuPB011802;BmuPB011909;BmuPB013836;BmuPB004389;Bmu…
		GO:0005543	247	63	30.5604	2.06149	2.59043e-06	0.000275527	molecular_function:phospholipid binding	BmuPB016985;BmuPB019371;BmuPB015227;BmuPB013524;BmuPB004048;BmuPB015249;BmuPB001342;BmuPB000991;BmuPB006709;BmuPB001642;BmuPB014710;BmuPB002020;BmuPB018075;BmuPB018596;BmuPB009275;BmuPB010074;BmuPB018846;BmuPB006665;BmuPB012909;BmuPB002078;BmuPB000999;BmuPB000444;BmuPB004758;BmuPB005348;BmuPB007594;BmuPB006735;BmuPB017104;BmuPB020609;BmuPB009644;BmuPB007468;BmuPB015324;BmuPB019091;BmuPB003359;Bmu…
		GO:0004674	211	55	26.1063	2.10677	4.8939e-06	0.000477155	molecular_function:protein serine/threonine kinase activity	BmuPB011971;BmuPB009157;BmuPB014883;BmuPB017114;BmuPB010201;BmuPB016562;BmuPB002020;BmuPB004389;BmuPB015518;BmuPB012704;BmuPB002968;BmuPB010207;BmuPB002528;BmuPB015624;BmuPB011767;BmuPB011626;BmuPB007706;BmuPB011447;BmuPB017079;BmuPB000999;BmuPB003535;BmuPB000416;BmuPB011517;BmuPB000078;BmuPB017104;BmuPB012886;BmuPB011393;BmuPB009672;BmuPB016218;BmuPB020197;BmuPB009170;BmuPB016882;BmuPB006337;Bmu…
		GO:0008270	1095	195	135.48	1.43932	1.32974e-05	0.00111128	molecular_function:zinc ion binding	BmuPB009951;BmuPB000697;BmuPB016997;BmuPB008481;BmuPB001463;BmuPB000575;BmuPB012183;BmuPB014579;BmuPB021249;BmuPB002486;BmuPB010942;BmuPB001061;BmuPB008694;BmuPB004403;BmuPB011557;BmuPB011663;BmuPB011413;BmuPB001530;BmuPB017088;BmuPB015211;BmuPB009498;BmuPB015226;BmuPB017949;BmuPB017616;BmuPB015186;BmuPB012749;BmuPB006818;BmuPB012451;BmuPB006709;BmuPB010150;BmuPB011549;BmuPB003045;BmuPB011931;Bmu…
		GO:0007165	669	125	82.773	1.51015	7.3405e-05	0.00505199	biological_process:signal transduction	BmuPB016695;BmuPB002516;BmuPB018163;BmuPB004725;BmuPB005440;BmuPB011068;BmuPB011800;BmuPB011265;BmuPB014903;BmuPB016394;BmuPB022114;BmuPB016751;BmuPB002940;BmuPB012735;BmuPB012687;BmuPB002664;BmuPB002389;BmuPB006129;BmuPB018612;BmuPB020942;BmuPB008638;BmuPB019807;BmuPB009157;BmuPB016788;BmuPB018575;BmuPB014866;BmuPB014315;BmuPB016750;BmuPB004831;BmuPB014937;BmuPB010928;BmuPB011909;BmuPB009092;Bmu…
		GO:0016539	165	39	20.4149	1.91037	0.000679315	0.0418315	biological_process:intein-mediated protein splicing	BmuPB008250;BmuPB012046;BmuPB021482;BmuPB011909;BmuPB009915;BmuPB009486;BmuPB014392;BmuPB002982;BmuPB006485;BmuPB008208;BmuPB001846;BmuPB002989;BmuPB009500;BmuPB007932;BmuPB019930;BmuPB007505;BmuPB011864;BmuPB006610;BmuPB002919;BmuPB010610;BmuPB006306;BmuPB012462;BmuPB017020;BmuPB005825;BmuPB013533;BmuPB001181;BmuPB005407;BmuPB001174;BmuPB001165;BmuPB001273;BmuPB019821;BmuPB012092;BmuPB016737;Bmu…
	KEGG	map04015	247	69	30.5604	2.25782	3.93127e-08	7.03698e-06	Rap1_signaling_pathway	BmuPB013267;BmuPB009107;BmuPB012463;BmuPB002138;BmuPB018163;BmuPB016562;BmuPB002020;BmuPB014940;BmuPB006515;BmuPB004389;BmuPB011068;BmuPB009092;BmuPB017522;BmuPB011508;BmuPB019277;BmuPB001547;BmuPB012946;BmuPB016992;BmuPB014392;BmuPB004717;BmuPB014694;BmuPB016989;BmuPB008029;BmuPB013464;BmuPB000999;BmuPB000444;BmuPB016760;BmuPB011011;BmuPB015212;BmuPB013701;BmuPB011397;BmuPB014903;BmuPB016394;Bmu…
		map04725	113	40	13.9811	2.86101	1.79034e-07	2.13648e-05	Cholinergic_synapse	BmuPB018887;BmuPB020197;BmuPB016092;BmuPB003283;BmuPB015244;BmuPB014081;BmuPB018599;BmuPB010181;BmuPB011704;BmuPB018163;BmuPB010201;BmuPB007695;BmuPB016562;BmuPB002020;BmuPB003187;BmuPB004389;BmuPB006687;BmuPB019277;BmuPB016992;BmuPB012136;BmuPB011026;BmuPB003746;BmuPB009883;BmuPB012201;BmuPB000999;BmuPB001395;BmuPB013424;BmuPB008540;BmuPB011011;BmuPB013701;BmuPB014903;BmuPB020942;BmuPB014409;Bmu…
		map04144	262	69	32.4163	2.12856	2.3953e-07	2.14379e-05	Endocytosis	BmuPB017012;BmuPB016641;BmuPB014922;BmuPB004563;BmuPB006117;BmuPB015624;BmuPB005930;BmuPB014694;BmuPB009935;BmuPB016752;BmuPB012724;BmuPB019639;BmuPB009910;BmuPB019627;BmuPB011517;BmuPB009147;BmuPB022320;BmuPB017104;BmuPB003096;BmuPB014573;BmuPB012886;BmuPB011393;BmuPB009170;BmuPB017974;BmuPB020255;BmuPB009178;BmuPB009556;BmuPB011526;BmuPB006681;BmuPB001238;BmuPB019017;BmuPB018283;BmuPB003667;Bmu…
		map04926	126	41	15.5895	2.62997	7.72642e-07	4.61009e-05	Relaxin_signaling_pathway	BmuPB016092;BmuPB009393;BmuPB013267;BmuPB011704;BmuPB018163;BmuPB001375;BmuPB010201;BmuPB016562;BmuPB002020;BmuPB003212;BmuPB006687;BmuPB006681;BmuPB019277;BmuPB016992;BmuPB012136;BmuPB016989;BmuPB011266;BmuPB011558;BmuPB003746;BmuPB009883;BmuPB000999;BmuPB001395;BmuPB013424;BmuPB000465;BmuPB018058;BmuPB009895;BmuPB011011;BmuPB009924;BmuPB017868;BmuPB015212;BmuPB013701;BmuPB012919;BmuPB014903;Bmu…
		map04360	175	51	21.6521	2.35543	6.64828e-07	4.61009e-05	Axon_guidance	BmuPB016562;BmuPB009120;BmuPB014694;BmuPB008125;BmuPB014058;BmuPB017866;BmuPB017106;BmuPB012201;BmuPB013751;BmuPB003189;BmuPB000444;BmuPB001746;BmuPB015458;BmuPB003769;BmuPB014903;BmuPB006610;BmuPB015530;BmuPB010610;BmuPB001028;BmuPB016154;BmuPB018408;BmuPB016092;BmuPB007126;BmuPB007488;BmuPB004700;BmuPB011704;BmuPB014101;BmuPB009693;BmuPB013499;BmuPB019273;BmuPB006681;BmuPB011558;BmuPB006086;Bmu…
		map04933	103	36	12.7438	2.8249	9.13357e-07	4.67117e-05	AGERAGE_signaling_pathway_in_diabetic_complications	BmuPB016092;BmuPB009393;BmuPB020597;BmuPB013267;BmuPB004700;BmuPB018163;BmuPB001375;BmuPB020598;BmuPB011827;BmuPB016562;BmuPB002020;BmuPB004389;BmuPB018568;BmuPB006681;BmuPB019277;BmuPB020596;BmuPB016992;BmuPB011767;BmuPB016989;BmuPB011266;BmuPB000999;BmuPB000444;BmuPB000818;BmuPB018058;BmuPB006393;BmuPB015778;BmuPB007594;BmuPB017868;BmuPB015212;BmuPB012919;BmuPB014903;BmuPB020942;BmuPB006610;Bmu…
		map04070	101	35	12.4964	2.80081	1.48823e-06	5.91986e-05	Phosphatidylinositol_signaling_system	BmuPB020197;BmuPB015244;BmuPB001895;BmuPB002807;BmuPB008537;BmuPB018133;BmuPB018163;BmuPB007695;BmuPB011827;BmuPB016562;BmuPB005543;BmuPB004389;BmuPB005697;BmuPB016081;BmuPB019277;BmuPB016992;BmuPB007135;BmuPB009910;BmuPB004450;BmuPB002433;BmuPB000444;BmuPB015242;BmuPB016760;BmuPB007594;BmuPB016157;BmuPB014903;BmuPB006610;BmuPB007791;BmuPB018989;BmuPB001863;BmuPB016182;BmuPB005699;BmuPB018267;Bmu…
		map04611	118	38	14.5997	2.60279	2.3682e-06	7.03107e-05	Platelet_activation	BmuPB016985;BmuPB016092;BmuPB015244;BmuPB009908;BmuPB002138;BmuPB011704;BmuPB018163;BmuPB010201;BmuPB007695;BmuPB002020;BmuPB014940;BmuPB003187;BmuPB006214;BmuPB006681;BmuPB019277;BmuPB016992;BmuPB004717;BmuPB011266;BmuPB003746;BmuPB012201;BmuPB000999;BmuPB001395;BmuPB000465;BmuPB011011;BmuPB017868;BmuPB015212;BmuPB009686;BmuPB013701;BmuPB014903;BmuPB006610;BmuPB011811;BmuPB004433;BmuPB016786;Bmu…
		map05230	59	25	7.29986	3.42472	2.55318e-06	7.03107e-05	Central_carbon_metabolism_in_cancer	BmuPB016092;BmuPB018283;BmuPB008616;BmuPB000999;BmuPB005832;BmuPB013402;BmuPB009924;BmuPB008043;BmuPB002020;BmuPB005615;BmuPB008617;BmuPB006515;BmuPB014903;BmuPB020942;BmuPB015070;BmuPB006610;BmuPB009427;BmuPB011929;BmuPB004433;BmuPB011508;BmuPB015530;BmuPB009528;BmuPB003396;BmuPB001465;BmuPB011558;
		map04510	205	55	25.3639	2.16843	2.30334e-06	7.03107e-05	Focal_adhesion	BmuPB004844;BmuPB013267;BmuPB006837;BmuPB009107;BmuPB002138;BmuPB001642;BmuPB016562;BmuPB002020;BmuPB006515;BmuPB004389;BmuPB011672;BmuPB001547;BmuPB004717;BmuPB014230;BmuPB011185;BmuPB016989;BmuPB012201;BmuPB000999;BmuPB012919;BmuPB014903;BmuPB012060;BmuPB017919;BmuPB006610;BmuPB011811;BmuPB010392;BmuPB016786;BmuPB015530;BmuPB015371;BmuPB016751;BmuPB006792;BmuPB001028;BmuPB017920;BmuPB020197;Bmu…
		map04912	93	32	11.5066	2.78102	4.67527e-06	0.000113581	GnRH_signaling_pathway	BmuPB016092;BmuPB015849;BmuPB015244;BmuPB016680;BmuPB018163;BmuPB001375;BmuPB010201;BmuPB007695;BmuPB016562;BmuPB003212;BmuPB004389;BmuPB019277;BmuPB016992;BmuPB011767;BmuPB011558;BmuPB003746;BmuPB011026;BmuPB001395;BmuPB000465;BmuPB006393;BmuPB016760;BmuPB009924;BmuPB011011;BmuPB017868;BmuPB015212;BmuPB013701;BmuPB020942;BmuPB016546;BmuPB004433;BmuPB009498;BmuPB009894;BmuPB011771;
		map04520	75	28	9.27949	3.01741	4.75898e-06	0.000113581	Adherens_junction	BmuPB016092;BmuPB009393;BmuPB006396;BmuPB004844;BmuPB004700;BmuPB009556;BmuPB015314;BmuPB005615;BmuPB014688;BmuPB004717;BmuPB003396;BmuPB006147;BmuPB011973;BmuPB013415;BmuPB012201;BmuPB013702;BmuPB012187;BmuPB000465;BmuPB014692;BmuPB018058;BmuPB005860;BmuPB004433;BmuPB003600;BmuPB015530;BmuPB001047;BmuPB005376;BmuPB002707;BmuPB021263;
		map04371	152	44	18.8064	2.33963	5.3536e-06	0.000119787	Apelin_signaling_pathway	BmuPB009393;BmuPB000101;BmuPB017114;BmuPB018163;BmuPB010201;BmuPB007695;BmuPB002020;BmuPB006687;BmuPB019277;BmuPB014868;BmuPB016992;BmuPB012136;BmuPB005643;BmuPB011800;BmuPB009883;BmuPB000999;BmuPB007977;BmuPB012560;BmuPB006393;BmuPB016760;BmuPB011011;BmuPB013701;BmuPB014409;BmuPB002919;BmuPB006849;BmuPB016092;BmuPB015244;BmuPB016882;BmuPB011704;BmuPB003187;BmuPB018568;BmuPB009561;BmuPB004830;Bmu…
		map04931	104	34	12.8676	2.6423	7.04552e-06	0.00014837	Insulin_resistance	BmuPB005832;BmuPB000101;BmuPB018606;BmuPB017114;BmuPB004564;BmuPB020598;BmuPB002020;BmuPB014801;BmuPB016626;BmuPB004389;BmuPB012704;BmuPB006681;BmuPB021535;BmuPB011767;BmuPB008555;BmuPB017900;BmuPB011266;BmuPB008856;BmuPB012547;BmuPB000999;BmuPB003266;BmuPB017007;BmuPB014692;BmuPB017937;BmuPB015778;BmuPB005860;BmuPB016682;BmuPB014903;BmuPB000800;BmuPB006610;BmuPB005644;BmuPB013447;BmuPB000574;Bmu…
		map04724	121	37	14.9709	2.47146	9.44303e-06	0.000177927	Glutamatergic_synapse	BmuPB020197;BmuPB016092;BmuPB005385;BmuPB016661;BmuPB015244;BmuPB010181;BmuPB011704;BmuPB018163;BmuPB003109;BmuPB017847;BmuPB010201;BmuPB007695;BmuPB005747;BmuPB016562;BmuPB004389;BmuPB006687;BmuPB011703;BmuPB019277;BmuPB016992;BmuPB012136;BmuPB016869;BmuPB003746;BmuPB009883;BmuPB001395;BmuPB013424;BmuPB002405;BmuPB011011;BmuPB013701;BmuPB014409;BmuPB001627;BmuPB017104;BmuPB004433;BmuPB011727;Bmu…
		map04713	102	33	12.6201	2.61488	1.10895e-05	0.00019065	Circadian_entrainment	BmuPB020197;BmuPB016092;BmuPB015244;BmuPB011704;BmuPB018163;BmuPB010201;BmuPB007695;BmuPB020228;BmuPB016562;BmuPB004389;BmuPB006687;BmuPB006214;BmuPB003170;BmuPB019277;BmuPB016992;BmuPB012136;BmuPB003746;BmuPB011026;BmuPB009883;BmuPB017667;BmuPB001395;BmuPB013424;BmuPB019178;BmuPB016760;BmuPB011011;BmuPB003269;BmuPB013701;BmuPB014409;BmuPB004433;BmuPB012088;BmuPB003297;BmuPB001360;BmuPB011771;
		map04140	147	42	18.1878	2.30924	1.11834e-05	0.00019065	Autophagy_animal	BmuPB002807;BmuPB017114;BmuPB010201;BmuPB007695;BmuPB002020;BmuPB019928;BmuPB017618;BmuPB004722;BmuPB011767;BmuPB008543;BmuPB019639;BmuPB015675;BmuPB000999;BmuPB007977;BmuPB014903;BmuPB006610;BmuPB016092;BmuPB016553;BmuPB018606;BmuPB002291;BmuPB018616;BmuPB009556;BmuPB017529;BmuPB007441;BmuPB011975;BmuPB013761;BmuPB015894;BmuPB011558;BmuPB011575;BmuPB014602;BmuPB008541;BmuPB012894;BmuPB008842;Bmu…
		map04916	98	32	12.1252	2.63913	1.4175e-05	0.000220637	Melanogenesis	BmuPB020197;BmuPB016092;BmuPB003111;BmuPB011704;BmuPB000099;BmuPB018163;BmuPB010201;BmuPB015314;BmuPB016562;BmuPB013499;BmuPB004389;BmuPB006704;BmuPB019277;BmuPB016992;BmuPB011558;BmuPB019623;BmuPB003746;BmuPB011026;BmuPB013702;BmuPB000100;BmuPB001395;BmuPB007932;BmuPB011778;BmuPB016760;BmuPB009924;BmuPB011011;BmuPB013701;BmuPB020942;BmuPB011841;BmuPB004433;BmuPB001360;BmuPB021263;
		map04062	181	47	22.3945	2.09873	2.75614e-05	0.000411124	Chemokine_signaling_pathway	BmuPB012175;BmuPB020610;BmuPB018163;BmuPB010201;BmuPB002020;BmuPB004389;BmuPB006687;BmuPB019277;BmuPB015624;BmuPB001547;BmuPB018846;BmuPB016992;BmuPB012136;BmuPB011767;BmuPB009883;BmuPB000999;BmuPB012700;BmuPB011517;BmuPB011011;BmuPB013701;BmuPB014903;BmuPB014409;BmuPB006610;BmuPB017104;BmuPB003096;BmuPB012886;BmuPB011393;BmuPB016218;BmuPB016092;BmuPB009995;BmuPB015849;BmuPB004700;BmuPB011704;Bmu…
		map04930	48	20	5.93887	3.36764	2.9799e-05	0.000426721	Type_II_diabetes_mellitus	BmuPB018887;BmuPB016092;BmuPB008616;BmuPB006825;BmuPB018606;BmuPB010181;BmuPB005413;BmuPB015778;BmuPB008617;BmuPB014903;BmuPB006610;BmuPB009427;BmuPB006681;BmuPB004433;BmuPB005644;BmuPB003297;BmuPB011767;BmuPB018396;BmuPB005412;BmuPB011771;
		map04925	95	30	11.754	2.55232	3.87579e-05	0.000533666	Aldosterone_synthesis_and_secretion	BmuPB011581;BmuPB020197;BmuPB015244;BmuPB010065;BmuPB016882;BmuPB018163;BmuPB010201;BmuPB007695;BmuPB016562;BmuPB004389;BmuPB019277;BmuPB004701;BmuPB016992;BmuPB003746;BmuPB011026;BmuPB001395;BmuPB003569;BmuPB021180;BmuPB014097;BmuPB016760;BmuPB015778;BmuPB011011;BmuPB013701;BmuPB010770;BmuPB021177;BmuPB003297;BmuPB009894;BmuPB013074;BmuPB016911;BmuPB011771;
		map04911	82	27	10.1456	2.66126	4.54844e-05	0.00058155	Insulin_secretion	BmuPB020197;BmuPB015244;BmuPB005832;BmuPB018606;BmuPB018163;BmuPB010201;BmuPB019270;BmuPB016562;BmuPB004389;BmuPB019277;BmuPB016992;BmuPB005412;BmuPB008691;BmuPB003746;BmuPB011026;BmuPB001395;BmuPB004560;BmuPB003569;BmuPB005413;BmuPB011011;BmuPB013701;BmuPB016394;BmuPB021177;BmuPB003171;BmuPB009894;BmuPB013074;BmuPB011771;
		map05206	143	39	17.6929	2.20428	4.53125e-05	0.00058155	MicroRNAs_in_cancer	BmuPB014567;BmuPB013267;BmuPB002687;BmuPB004324;BmuPB016562;BmuPB006515;BmuPB004389;BmuPB009120;BmuPB000444;BmuPB007089;BmuPB011841;BmuPB015530;BmuPB013804;BmuPB006792;BmuPB001028;BmuPB020197;BmuPB003742;BmuPB001930;BmuPB020598;BmuPB020228;BmuPB011227;BmuPB018568;BmuPB011975;BmuPB003396;BmuPB011558;BmuPB013702;BmuPB018283;BmuPB017454;BmuPB015247;BmuPB010097;BmuPB015778;BmuPB009924;BmuPB020942;Bmu…
		map04540	91	29	11.2591	2.57569	4.91829e-05	0.000607154	Gap_junction	BmuPB020197;BmuPB016092;BmuPB015244;BmuPB011704;BmuPB018163;BmuPB010201;BmuPB007695;BmuPB016562;BmuPB006515;BmuPB004389;BmuPB006214;BmuPB019277;BmuPB016992;BmuPB018906;BmuPB011558;BmuPB003746;BmuPB001395;BmuPB000465;BmuPB009987;BmuPB009924;BmuPB011011;BmuPB000624;BmuPB013701;BmuPB020942;BmuPB004433;BmuPB009894;BmuPB011928;BmuPB004764;BmuPB013515;
		map04071	122	35	15.0946	2.31871	5.35082e-05	0.000638531	Sphingolipid_signaling_pathway	BmuPB020197;BmuPB016092;BmuPB006483;BmuPB014876;BmuPB004731;BmuPB018616;BmuPB004700;BmuPB011704;BmuPB004324;BmuPB018163;BmuPB010082;BmuPB016562;BmuPB002020;BmuPB004389;BmuPB006681;BmuPB019277;BmuPB001973;BmuPB016992;BmuPB011266;BmuPB011558;BmuPB001956;BmuPB012201;BmuPB000999;BmuPB015778;BmuPB009924;BmuPB017868;BmuPB015212;BmuPB014903;BmuPB020942;BmuPB006610;BmuPB001294;BmuPB004433;BmuPB020257;Bmu…
		map04934	162	42	20.0437	2.09542	7.08526e-05	0.000792663	Cushing_s_syndrome	BmuPB010065;BmuPB000099;BmuPB018163;BmuPB010201;BmuPB007695;BmuPB015314;BmuPB019277;BmuPB016992;BmuPB007932;BmuPB021180;BmuPB016560;BmuPB011011;BmuPB013701;BmuPB010770;BmuPB011841;BmuPB021177;BmuPB003297;BmuPB011771;BmuPB021263;BmuPB016092;BmuPB003111;BmuPB015244;BmuPB011845;BmuPB011704;BmuPB018849;BmuPB003065;BmuPB013499;BmuPB018568;BmuPB006704;BmuPB013003;BmuPB019623;BmuPB003746;BmuPB011026;Bmu…
		map04150	162	42	20.0437	2.09542	7.08526e-05	0.000792663	mTOR_signaling_pathway	BmuPB016950;BmuPB017114;BmuPB000099;BmuPB016562;BmuPB002020;BmuPB004389;BmuPB012704;BmuPB000460;BmuPB000999;BmuPB007932;BmuPB014903;BmuPB006610;BmuPB011841;BmuPB007948;BmuPB001465;BmuPB020197;BmuPB016092;BmuPB003111;BmuPB006975;BmuPB001554;BmuPB018606;BmuPB002291;BmuPB009556;BmuPB013499;BmuPB006704;BmuPB011975;BmuPB013857;BmuPB008251;BmuPB013761;BmuPB011558;BmuPB019623;BmuPB012547;BmuPB000100;Bmu…
		map04550	136	37	16.8268	2.19887	7.80733e-05	0.000846977	Signaling_pathways_regulating_pluripotency_of_stem_cells	BmuPB009393;BmuPB008631;BmuPB000099;BmuPB002020;BmuPB011508;BmuPB005025;BmuPB000999;BmuPB007932;BmuPB016560;BmuPB015212;BmuPB014903;BmuPB006610;BmuPB011841;BmuPB008734;BmuPB006328;BmuPB000276;BmuPB016092;BmuPB003111;BmuPB009556;BmuPB020598;BmuPB005615;BmuPB008464;BmuPB013499;BmuPB006704;BmuPB018263;BmuPB011558;BmuPB019623;BmuPB018283;BmuPB013846;BmuPB000100;BmuPB011778;BmuPB012492;BmuPB009924;Bmu…
		map04722	120	34	14.8472	2.29	8.08845e-05	0.000851666	Neurotrophin_signaling_pathway	BmuPB013454;BmuPB016092;BmuPB012175;BmuPB008822;BmuPB009107;BmuPB004700;BmuPB020228;BmuPB002020;BmuPB013276;BmuPB012704;BmuPB009915;BmuPB009120;BmuPB011767;BmuPB011558;BmuPB012547;BmuPB011026;BmuPB000999;BmuPB000444;BmuPB004419;BmuPB016760;BmuPB009924;BmuPB017868;BmuPB015212;BmuPB014903;BmuPB020942;BmuPB006610;BmuPB004433;BmuPB003989;BmuPB016326;BmuPB003530;BmuPB020257;BmuPB011949;BmuPB005644;Bmu…
		map04919	114	33	14.1048	2.33963	9.2931e-05	0.000878652	Thyroid_hormone_signaling_pathway	BmuPB020197;BmuPB016092;BmuPB005832;BmuPB018163;BmuPB010201;BmuPB011827;BmuPB016562;BmuPB002020;BmuPB003232;BmuPB004389;BmuPB018568;BmuPB019277;BmuPB016992;BmuPB004717;BmuPB009106;BmuPB011558;BmuPB017743;BmuPB013702;BmuPB000999;BmuPB000465;BmuPB000444;BmuPB019186;BmuPB012560;BmuPB003569;BmuPB007594;BmuPB009924;BmuPB014903;BmuPB020942;BmuPB006610;BmuPB008796;BmuPB004433;BmuPB019558;BmuPB013074;
		map04971	71	24	8.78458	2.73206	9.32647e-05	0.000878652	Gastric_acid_secretion	BmuPB020197;BmuPB015244;BmuPB018599;BmuPB011704;BmuPB018163;BmuPB010201;BmuPB007695;BmuPB016562;BmuPB004389;BmuPB020044;BmuPB019277;BmuPB016992;BmuPB003746;BmuPB011026;BmuPB001395;BmuPB003569;BmuPB012560;BmuPB016760;BmuPB011011;BmuPB013701;BmuPB012738;BmuPB013074;BmuPB011271;BmuPB000556;
		map04670	117	33	14.476	2.27964	0.000112599	0.0010336	Leukocyte_transendothelial_migration	BmuPB020197;BmuPB004163;BmuPB006396;BmuPB004844;BmuPB009995;BmuPB015849;BmuPB005825;BmuPB004700;BmuPB011704;BmuPB014101;BmuPB001375;BmuPB016562;BmuPB003116;BmuPB004389;BmuPB017522;BmuPB004556;BmuPB001547;BmuPB004717;BmuPB008029;BmuPB000444;BmuPB021233;BmuPB017868;BmuPB015212;BmuPB014903;BmuPB016394;BmuPB012738;BmuPB006610;BmuPB003600;BmuPB016786;BmuPB016326;BmuPB013947;BmuPB001047;BmuPB016751;
		map04928	102	30	12.6201	2.37716	0.000121125	0.00108407	Parathyroid_hormone_synthesis_secretion_and_action	BmuPB014567;BmuPB020197;BmuPB016092;BmuPB004731;BmuPB015244;BmuPB017312;BmuPB011704;BmuPB018163;BmuPB010201;BmuPB007695;BmuPB016562;BmuPB005615;BmuPB011618;BmuPB004389;BmuPB009561;BmuPB019277;BmuPB016992;BmuPB011558;BmuPB003746;BmuPB001395;BmuPB006393;BmuPB012092;BmuPB011011;BmuPB013701;BmuPB003096;BmuPB021177;BmuPB004433;BmuPB020257;BmuPB009498;BmuPB009894;
		map01521	88	27	10.8879	2.47981	0.000134956	0.00112621	EGFR_tyrosine_kinase_inhibitor_resistance	BmuPB020197;BmuPB016092;BmuPB012175;BmuPB017114;BmuPB013267;BmuPB009556;BmuPB020598;BmuPB016562;BmuPB002020;BmuPB006515;BmuPB004389;BmuPB011508;BmuPB003396;BmuPB011558;BmuPB018283;BmuPB000999;BmuPB000465;BmuPB000444;BmuPB007089;BmuPB009924;BmuPB014903;BmuPB020942;BmuPB006610;BmuPB004433;BmuPB015530;BmuPB020257;BmuPB004764;
		map04910	146	38	18.0641	2.10362	0.000135271	0.00112621	Insulin_signaling_pathway	BmuPB002847;BmuPB000101;BmuPB017114;BmuPB009107;BmuPB010201;BmuPB002020;BmuPB008617;BmuPB009993;BmuPB006147;BmuPB011931;BmuPB000999;BmuPB017007;BmuPB016760;BmuPB005860;BmuPB016682;BmuPB014903;BmuPB000800;BmuPB006610;BmuPB016092;BmuPB004762;BmuPB018606;BmuPB016882;BmuPB006681;BmuPB011975;BmuPB018396;BmuPB011558;BmuPB009865;BmuPB008616;BmuPB003266;BmuPB014692;BmuPB017937;BmuPB009924;BmuPB004518;Bmu…
		map04921	158	40	19.5488	2.04616	0.000151356	0.00122539	Oxytocin_signaling_pathway	BmuPB003283;BmuPB000101;BmuPB018163;BmuPB010201;BmuPB007695;BmuPB016562;BmuPB004389;BmuPB019277;BmuPB016992;BmuPB004717;BmuPB011777;BmuPB016760;BmuPB011011;BmuPB013701;BmuPB015581;BmuPB011771;BmuPB016563;BmuPB020197;BmuPB016092;BmuPB015244;BmuPB011704;BmuPB003187;BmuPB018568;BmuPB011266;BmuPB016565;BmuPB011558;BmuPB003746;BmuPB011026;BmuPB004368;BmuPB001395;BmuPB000465;BmuPB008842;BmuPB009924;Bmu…
		map04022	169	42	20.9098	2.00863	0.00015403	0.00122539	cGMPPKG_signaling_pathway	BmuPB004731;BmuPB005647;BmuPB018163;BmuPB007695;BmuPB002020;BmuPB003044;BmuPB019277;BmuPB014868;BmuPB016992;BmuPB015852;BmuPB017743;BmuPB000999;BmuPB003569;BmuPB016760;BmuPB011011;BmuPB013701;BmuPB021177;BmuPB016786;BmuPB015581;BmuPB011771;BmuPB011581;BmuPB016092;BmuPB015244;BmuPB018606;BmuPB011704;BmuPB003187;BmuPB006214;BmuPB009561;BmuPB004830;BmuPB011266;BmuPB011558;BmuPB008691;BmuPB003746;Bmu…
		map04370	56	20	6.92868	2.88655	0.000165102	0.00126868	VEGF_signaling_pathway	BmuPB020197;BmuPB016092;BmuPB000999;BmuPB000444;BmuPB000465;BmuPB013267;BmuPB004700;BmuPB014101;BmuPB009924;BmuPB017868;BmuPB015212;BmuPB016562;BmuPB002020;BmuPB014903;BmuPB020942;BmuPB004389;BmuPB006610;BmuPB004433;BmuPB011266;BmuPB011558;
		map04261	152	39	18.8064	2.07376	0.000170102	0.00126868	Adrenergic_signaling_in_cardiomyocytes	BmuPB018599;BmuPB018163;BmuPB010201;BmuPB016562;BmuPB002020;BmuPB019277;BmuPB001973;BmuPB016992;BmuPB015852;BmuPB007605;BmuPB000999;BmuPB011777;BmuPB012560;BmuPB003569;BmuPB016760;BmuPB011011;BmuPB001140;BmuPB015212;BmuPB013701;BmuPB016394;BmuPB021177;BmuPB011771;BmuPB016563;BmuPB011581;BmuPB006483;BmuPB016092;BmuPB011704;BmuPB020228;BmuPB009477;BmuPB003187;BmuPB016565;BmuPB003746;BmuPB011026;Bmu…
		map04720	64	22	7.91849	2.77831	0.000167067	0.00126868	Longterm_potentiation	BmuPB020197;BmuPB016092;BmuPB015244;BmuPB018163;BmuPB010201;BmuPB007695;BmuPB016562;BmuPB004389;BmuPB012704;BmuPB019277;BmuPB016992;BmuPB011558;BmuPB011026;BmuPB012547;BmuPB013702;BmuPB016760;BmuPB009924;BmuPB011011;BmuPB020942;BmuPB004433;BmuPB012088;BmuPB016326;
		map00562	72	23	8.90831	2.58186	0.00023216	0.00169619	Inositol_phosphate_metabolism	BmuPB001895;BmuPB002807;BmuPB009178;BmuPB018133;BmuPB018163;BmuPB014890;BmuPB011827;BmuPB005543;BmuPB016081;BmuPB019277;BmuPB016992;BmuPB007135;BmuPB009910;BmuPB004450;BmuPB002433;BmuPB000444;BmuPB007594;BmuPB016157;BmuPB006610;BmuPB007791;BmuPB018989;BmuPB016182;BmuPB005699;
		map04666	96	28	11.8777	2.35735	0.000239058	0.00171165	Fc_gamma_Rmediated_phagocytosis	BmuPB020197;BmuPB016092;BmuPB014075;BmuPB009995;BmuPB017360;BmuPB017114;BmuPB004700;BmuPB016562;BmuPB002020;BmuPB004389;BmuPB004677;BmuPB011767;BmuPB011558;BmuPB009910;BmuPB000999;BmuPB012187;BmuPB000444;BmuPB015778;BmuPB014542;BmuPB010630;BmuPB014903;BmuPB006610;BmuPB004433;BmuPB016786;BmuPB005699;BmuPB010970;BmuPB002707;BmuPB016154;
		map04750	103	29	12.7438	2.27561	0.000252734	0.00177409	Inflammatory_mediator_regulation_of_TRP_channels	BmuPB020197;BmuPB015244;BmuPB018163;BmuPB003100;BmuPB010201;BmuPB007695;BmuPB016562;BmuPB004389;BmuPB010801;BmuPB019277;BmuPB016992;BmuPB011767;BmuPB004895;BmuPB003746;BmuPB011026;BmuPB011269;BmuPB001395;BmuPB000465;BmuPB000444;BmuPB016760;BmuPB015778;BmuPB011011;BmuPB017868;BmuPB015212;BmuPB013701;BmuPB014903;BmuPB006610;BmuPB016546;BmuPB003989;
		map04728	133	35	16.4556	2.12693	0.000274683	0.00179454	Dopaminergic_synapse	BmuPB018887;BmuPB018605;BmuPB010181;BmuPB018163;BmuPB010201;BmuPB007695;BmuPB016562;BmuPB002020;BmuPB005440;BmuPB004389;BmuPB006687;BmuPB019277;BmuPB001973;BmuPB016992;BmuPB012136;BmuPB021464;BmuPB009883;BmuPB000999;BmuPB016760;BmuPB015212;BmuPB014409;BmuPB021177;BmuPB011771;BmuPB006483;BmuPB020197;BmuPB015244;BmuPB011704;BmuPB007947;BmuPB011026;BmuPB013424;BmuPB002430;BmuPB017868;BmuPB015449;Bmu…
		map05223	68	22	8.4134	2.61488	0.00028071	0.00179454	Nonsmall_cell_lung_cancer	BmuPB020197;BmuPB016092;BmuPB012175;BmuPB020597;BmuPB020598;BmuPB016562;BmuPB002020;BmuPB004389;BmuPB018568;BmuPB017522;BmuPB020596;BmuPB003396;BmuPB011558;BmuPB000999;BmuPB000444;BmuPB015247;BmuPB000416;BmuPB009924;BmuPB014903;BmuPB020942;BmuPB006610;BmuPB004433;
		map04723	152	38	18.8064	2.02059	0.000278115	0.00179454	Retrograde_endocannabinoid_signaling	BmuPB018887;BmuPB009968;BmuPB016661;BmuPB010181;BmuPB018163;BmuPB010201;BmuPB007695;BmuPB019648;BmuPB016562;BmuPB004389;BmuPB006687;BmuPB019277;BmuPB008565;BmuPB004701;BmuPB016992;BmuPB012136;BmuPB009883;BmuPB011011;BmuPB006682;BmuPB015212;BmuPB013701;BmuPB014409;BmuPB011771;BmuPB020197;BmuPB016092;BmuPB015244;BmuPB011704;BmuPB018550;BmuPB003746;BmuPB001395;BmuPB013424;BmuPB006315;BmuPB017868;Bmu…
		map04012	88	26	10.8879	2.38796	0.000270883	0.00179454	ErbB_signaling_pathway	BmuPB020197;BmuPB016092;BmuPB020597;BmuPB017114;BmuPB014101;BmuPB016562;BmuPB002020;BmuPB003212;BmuPB004389;BmuPB019273;BmuPB009120;BmuPB020596;BmuPB003396;BmuPB011558;BmuPB011026;BmuPB000999;BmuPB000465;BmuPB000444;BmuPB009924;BmuPB014903;BmuPB020942;BmuPB006610;BmuPB004433;BmuPB016815;BmuPB001028;BmuPB006806;
		map04961	45	17	5.56769	3.05333	0.000291886	0.00183325	Endocrine_and_other_factorregulated_calcium_reabsorption	BmuPB006558;BmuPB020197;BmuPB009170;BmuPB003569;BmuPB016641;BmuPB018163;BmuPB010201;BmuPB016562;BmuPB013701;BmuPB011618;BmuPB004389;BmuPB019277;BmuPB010074;BmuPB016992;BmuPB013074;BmuPB016752;BmuPB020967;
		map04730	63	21	7.79477	2.69412	0.00030216	0.00186506	Longterm_depression	BmuPB020197;BmuPB016092;BmuPB004731;BmuPB015244;BmuPB009556;BmuPB011845;BmuPB010181;BmuPB011704;BmuPB018163;BmuPB007695;BmuPB009924;BmuPB016562;BmuPB020942;BmuPB004389;BmuPB006214;BmuPB004433;BmuPB019277;BmuPB016992;BmuPB009894;BmuPB001360;BmuPB011558;
		map04745	28	13	3.46434	3.75252	0.000314356	0.00190745	Phototransduction_fly	BmuPB011026;BmuPB017104;BmuPB019277;BmuPB004701;BmuPB016992;BmuPB004717;BmuPB012372;BmuPB016760;BmuPB018163;BmuPB016911;BmuPB007695;BmuPB016562;BmuPB016218;
		map05221	70	22	8.66085	2.54017	0.000375519	0.0022406	Acute_myeloid_leukemia	BmuPB016092;BmuPB020597;BmuPB017114;BmuPB015314;BmuPB020598;BmuPB002020;BmuPB018568;BmuPB003170;BmuPB020596;BmuPB011558;BmuPB017667;BmuPB000999;BmuPB008558;BmuPB003412;BmuPB009924;BmuPB014903;BmuPB020942;BmuPB006610;BmuPB004433;BmuPB005644;BmuPB015226;BmuPB021263;
		map01522	95	27	11.754	2.29709	0.000397668	0.00233386	Endocrine_resistance	BmuPB016092;BmuPB017114;BmuPB009556;BmuPB018143;BmuPB014101;BmuPB001375;BmuPB010201;BmuPB002020;BmuPB003232;BmuPB018568;BmuPB003396;BmuPB011558;BmuPB003746;BmuPB000999;BmuPB001395;BmuPB000465;BmuPB009924;BmuPB011011;BmuPB017868;BmuPB015212;BmuPB013701;BmuPB014903;BmuPB020942;BmuPB006610;BmuPB004433;BmuPB020257;BmuPB016075;
		map04152	129	33	15.9607	2.06758	0.000569856	0.00313859	AMPK_signaling_pathway	BmuPB012175;BmuPB002847;BmuPB000101;BmuPB017114;BmuPB014957;BmuPB002020;BmuPB001973;BmuPB010648;BmuPB010309;BmuPB010007;BmuPB015852;BmuPB011931;BmuPB000999;BmuPB016682;BmuPB014903;BmuPB006610;BmuPB006483;BmuPB016882;BmuPB018606;BmuPB009556;BmuPB013500;BmuPB008043;BmuPB015070;BmuPB018568;BmuPB011652;BmuPB011975;BmuPB017797;BmuPB004368;BmuPB003266;BmuPB017937;BmuPB008842;BmuPB008916;BmuPB010016;
		map04721	68	21	8.4134	2.49602	0.000929165	0.00489178	Synaptic_vesicle_cycle	BmuPB018887;BmuPB009170;BmuPB016661;BmuPB001279;BmuPB016641;BmuPB010181;BmuPB019270;BmuPB010074;BmuPB019366;BmuPB016752;BmuPB020967;BmuPB009190;BmuPB006558;BmuPB016049;BmuPB004560;BmuPB020415;BmuPB001736;BmuPB016737;BmuPB003171;BmuPB004489;BmuPB018551;
		map05213	62	19	7.67104	2.47685	0.00118337	0.00596686	Endometrial_cancer	BmuPB016092;BmuPB012175;BmuPB013846;BmuPB006396;BmuPB000999;BmuPB015247;BmuPB016560;BmuPB015314;BmuPB009924;BmuPB002020;BmuPB014903;BmuPB020942;BmuPB006610;BmuPB018568;BmuPB004433;BmuPB003600;BmuPB003396;BmuPB011558;BmuPB021263;
		map04340	51	17	6.31005	2.69412	0.00127494	0.00625243	Hedgehog_signaling_pathway	BmuPB007448;BmuPB006337;BmuPB015458;BmuPB006052;BmuPB010201;BmuPB000274;BmuPB011226;BmuPB018568;BmuPB000051;BmuPB017104;BmuPB013539;BmuPB003096;BmuPB020257;BmuPB013925;BmuPB011928;BmuPB011447;BmuPB016218;
		map04066	108	28	13.3625	2.09542	0.00134026	0.00640672	HIF1_signaling_pathway	BmuPB020197;BmuPB016092;BmuPB008116;BmuPB005832;BmuPB018606;BmuPB017114;BmuPB013267;BmuPB009556;BmuPB020598;BmuPB016562;BmuPB002020;BmuPB008617;BmuPB004389;BmuPB003396;BmuPB011266;BmuPB011026;BmuPB013702;BmuPB009865;BmuPB008616;BmuPB000999;BmuPB000444;BmuPB009924;BmuPB014903;BmuPB013444;BmuPB006610;BmuPB002919;BmuPB004433;BmuPB020257;
		map04917	81	23	10.0218	2.29499	0.00134219	0.00640672	Prolactin_signaling_pathway	BmuPB016092;BmuPB018605;BmuPB012175;BmuPB018606;BmuPB016680;BmuPB020597;BmuPB009858;BmuPB020598;BmuPB002020;BmuPB018568;BmuPB020596;BmuPB011558;BmuPB003367;BmuPB000999;BmuPB000465;BmuPB009924;BmuPB017868;BmuPB015212;BmuPB014903;BmuPB020942;BmuPB011720;BmuPB006610;BmuPB004433;
		map04972	100	26	12.3726	2.10141	0.00151657	0.00714384	Pancreatic_secretion	BmuPB011581;BmuPB020197;BmuPB015244;BmuPB012339;BmuPB014957;BmuPB004700;BmuPB018599;BmuPB018163;BmuPB007695;BmuPB016562;BmuPB003044;BmuPB004389;BmuPB019277;BmuPB016992;BmuPB018567;BmuPB008691;BmuPB003746;BmuPB001395;BmuPB003569;BmuPB012560;BmuPB011011;BmuPB013701;BmuPB016326;BmuPB013074;BmuPB009834;BmuPB011271;
		map04914	94	25	11.6303	2.14956	0.00171456	0.00797159	Progesteronemediated_oocyte_maturation	BmuPB016092;BmuPB004743;BmuPB018606;BmuPB009903;BmuPB009556;BmuPB011704;BmuPB010201;BmuPB002020;BmuPB012704;BmuPB004386;BmuPB011558;BmuPB003746;BmuPB012547;BmuPB000999;BmuPB001395;BmuPB008843;BmuPB011011;BmuPB017868;BmuPB015212;BmuPB004455;BmuPB013701;BmuPB014903;BmuPB006610;BmuPB004433;BmuPB009672;
		map04664	78	22	9.65067	2.27964	0.00190157	0.00872773	Fc_epsilon_RI_signaling_pathway	BmuPB016092;BmuPB009995;BmuPB008776;BmuPB004700;BmuPB016562;BmuPB002020;BmuPB003212;BmuPB002681;BmuPB011558;BmuPB012201;BmuPB000999;BmuPB000444;BmuPB009924;BmuPB009686;BmuPB015212;BmuPB017868;BmuPB014903;BmuPB020942;BmuPB006610;BmuPB016546;BmuPB004433;BmuPB005699;
		map05214	71	20	8.78458	2.27672	0.00222903	0.0101012	Glioma	BmuPB020197;BmuPB016092;BmuPB009556;BmuPB016562;BmuPB002020;BmuPB006515;BmuPB004389;BmuPB018568;BmuPB011558;BmuPB011026;BmuPB000999;BmuPB000444;BmuPB015247;BmuPB016760;BmuPB009924;BmuPB014903;BmuPB020942;BmuPB006610;BmuPB004433;BmuPB004764;
		map04211	90	24	11.1354	2.15529	0.00228298	0.0102061	Longevity_regulating_pathway	BmuPB012175;BmuPB000101;BmuPB018606;BmuPB017114;BmuPB009556;BmuPB013500;BmuPB010201;BmuPB002020;BmuPB011975;BmuPB010648;BmuPB008543;BmuPB003746;BmuPB015675;BmuPB000999;BmuPB001395;BmuPB018888;BmuPB008842;BmuPB011011;BmuPB013701;BmuPB014903;BmuPB008916;BmuPB020942;BmuPB006610;BmuPB021177;
		map05210	91	24	11.2591	2.13161	0.0023883	0.010427	Colorectal_cancer	BmuPB016092;BmuPB009393;BmuPB017114;BmuPB004700;BmuPB015314;BmuPB002020;BmuPB018568;BmuPB011068;BmuPB009092;BmuPB011558;BmuPB000277;BmuPB000999;BmuPB013846;BmuPB015247;BmuPB018058;BmuPB016560;BmuPB007089;BmuPB009924;BmuPB014903;BmuPB020942;BmuPB006610;BmuPB004433;BmuPB020257;BmuPB021263;
		map00515	24	10	2.96943	3.36764	0.00284726	0.012002	Mannose_type_Oglycan_biosynthesis	BmuPB014308;BmuPB013037;BmuPB007151;BmuPB010939;BmuPB009110;BmuPB019347;BmuPB007645;BmuPB005657;BmuPB005862;BmuPB019711;
		map04970	100	25	12.3726	2.02059	0.00366869	0.0147572	Salivary_secretion	BmuPB011581;BmuPB020197;BmuPB015244;BmuPB018163;BmuPB010201;BmuPB007695;BmuPB016562;BmuPB004389;BmuPB006214;BmuPB019277;BmuPB016992;BmuPB015852;BmuPB008691;BmuPB003746;BmuPB001395;BmuPB003569;BmuPB012560;BmuPB016760;BmuPB011011;BmuPB013701;BmuPB003171;BmuPB002801;BmuPB013074;BmuPB009834;BmuPB011271;
		map04213	65	18	8.04222	2.23819	0.00436878	0.0171871	Longevity_regulating_pathway_multiple_species	BmuPB012175;BmuPB000101;BmuPB018606;BmuPB017114;BmuPB009556;BmuPB010201;BmuPB002020;BmuPB015943;BmuPB011975;BmuPB003746;BmuPB000999;BmuPB001395;BmuPB011011;BmuPB013701;BmuPB014903;BmuPB020942;BmuPB006610;BmuPB019523;
		map05212	76	20	9.40321	2.12693	0.00482983	0.0187943	Pancreatic_cancer	BmuPB016092;BmuPB009393;BmuPB017114;BmuPB013267;BmuPB004700;BmuPB020598;BmuPB002020;BmuPB018568;BmuPB011068;BmuPB009092;BmuPB003396;BmuPB011558;BmuPB000277;BmuPB000999;BmuPB015247;BmuPB018058;BmuPB014903;BmuPB006610;BmuPB004433;BmuPB005644;
		map00620	46	14	5.69142	2.45984	0.00585202	0.0215982	Pyruvate_metabolism	BmuPB017976;BmuPB001552;BmuPB005274;BmuPB002847;BmuPB017099;BmuPB017937;BmuPB010240;BmuPB012998;BmuPB009427;BmuPB013782;BmuPB002109;BmuPB018396;BmuPB000506;BmuPB000803;
		map05217	63	17	7.79477	2.18095	0.00675007	0.0241653	Basal_cell_carcinoma	BmuPB019623;BmuPB007448;BmuPB013846;BmuPB003111;BmuPB000100;BmuPB015247;BmuPB007932;BmuPB011778;BmuPB006052;BmuPB016560;BmuPB000099;BmuPB015314;BmuPB013499;BmuPB000274;BmuPB011841;BmuPB006704;BmuPB021263;
		map00514	24	9	2.96943	3.03088	0.00784194	0.0272565	Other_types_of_Oglycan_biosynthesis	BmuPB013037;BmuPB014917;BmuPB008024;BmuPB010939;BmuPB009110;BmuPB012254;BmuPB004736;BmuPB020666;BmuPB005862;
		map04927	69	18	8.53713	2.10844	0.00880492	0.0303092	Cortisol_synthesis_and_secretion	BmuPB015244;BmuPB010065;BmuPB018163;BmuPB010201;BmuPB007695;BmuPB019277;BmuPB016992;BmuPB013003;BmuPB003746;BmuPB001395;BmuPB021180;BmuPB011011;BmuPB013701;BmuPB010770;BmuPB021177;BmuPB003297;BmuPB009894;BmuPB011771;
		map05218	79	20	9.77439	2.04616	0.00894418	0.0304954	Melanoma	BmuPB016092;BmuPB009556;BmuPB002020;BmuPB005615;BmuPB006515;BmuPB018568;BmuPB012946;BmuPB013464;BmuPB011558;BmuPB000999;BmuPB015247;BmuPB009675;BmuPB009924;BmuPB014903;BmuPB020942;BmuPB006610;BmuPB004433;BmuPB015530;BmuPB009719;BmuPB004764;
		map04918	70	18	8.66085	2.07832	0.00937296	0.0316558	Thyroid_hormone_synthesis	BmuPB014087;BmuPB020197;BmuPB015244;BmuPB018163;BmuPB010201;BmuPB007695;BmuPB016562;BmuPB009103;BmuPB004389;BmuPB019277;BmuPB016992;BmuPB003746;BmuPB001395;BmuPB003569;BmuPB011011;BmuPB013701;BmuPB021177;BmuPB013074;
		map00533	16	7	1.97962	3.53602	0.00978572	0.032741	Glycosaminoglycan_biosynthesis_keratan_sulfate	BmuPB014090;BmuPB001565;BmuPB013037;BmuPB008529;BmuPB015610;BmuPB005862;BmuPB001542;
		map05219	45	13	5.56769	2.3349	0.0105512	0.0346545	Bladder_cancer	BmuPB016092;BmuPB018283;BmuPB000465;BmuPB013267;BmuPB001375;BmuPB009924;BmuPB020228;BmuPB020942;BmuPB007441;BmuPB018568;BmuPB004433;BmuPB003396;BmuPB011558;
		map04711	9	5	1.11354	4.49019	0.0138189	0.04456	Circadian_rhythm_fly	BmuPB017667;BmuPB013539;BmuPB003170;BmuPB005440;BmuPB007347;
		map04923	58	15	7.17614	2.09026	0.0144876	0.0453258	Regulation_of_lipolysis_in_adipocytes	BmuPB003746;BmuPB000999;BmuPB001395;BmuPB018606;BmuPB016882;BmuPB020959;BmuPB011704;BmuPB010201;BmuPB019648;BmuPB011011;BmuPB002020;BmuPB013701;BmuPB014903;BmuPB006610;BmuPB006214;
		map05020	35	11	4.33043	2.54017	0.01456	0.0453258	Prion_diseases	BmuPB012477;BmuPB016092;BmuPB012201;BmuPB005285;BmuPB006837;BmuPB006393;BmuPB010201;BmuPB009924;BmuPB004433;BmuPB019523;BmuPB015542;
hypothalamus vs brainstem	GO	GO:0005515	4194	445	298.545	1.49056	6.035e-12	5.7936e-09	molecular_function:protein binding	BmuPB018163;BmuPB002209;BmuPB002719;BmuPB015945;BmuPB019003;BmuPB009568;BmuPB005860;BmuPB016176;BmuPB010623;BmuPB017104;BmuPB011694;BmuPB003111;BmuPB003100;BmuPB021461;BmuPB018276;BmuPB018577;BmuPB009609;BmuPB002228;BmuPB014937;BmuPB017672;BmuPB011888;BmuPB003134;BmuPB000440;BmuPB017906;BmuPB004750;BmuPB020197;BmuPB007956;BmuPB006086;BmuPB014537;BmuPB008469;BmuPB016100;BmuPB010021;BmuPB009120;Bmu…
		GO:0004672	503	70	35.8055	1.95501	1.86673e-06	0.000896031	molecular_function:protein kinase activity	BmuPB010201;BmuPB018351;BmuPB012704;BmuPB009120;BmuPB017070;BmuPB008076;BmuPB004386;BmuPB009568;BmuPB000999;BmuPB017867;BmuPB010995;BmuPB016418;BmuPB011517;BmuPB017104;BmuPB016976;BmuPB012886;BmuPB000574;BmuPB009672;BmuPB005657;BmuPB011928;BmuPB010773;BmuPB007131;BmuPB009556;BmuPB014101;BmuPB015109;BmuPB000672;BmuPB020228;BmuPB018265;BmuPB005615;BmuPB006214;BmuPB002920;BmuPB019273;BmuPB006681;Bmu…
		GO:0006468	688	87	48.9745	1.77643	4.06116e-06	0.00129957	biological_process:protein phosphorylation	BmuPB001463;BmuPB010201;BmuPB018351;BmuPB012704;BmuPB017070;BmuPB008076;BmuPB004386;BmuPB009568;BmuPB000999;BmuPB017867;BmuPB013065;BmuPB010995;BmuPB011517;BmuPB005860;BmuPB017104;BmuPB012886;BmuPB000574;BmuPB009672;BmuPB011928;BmuPB016882;BmuPB014101;BmuPB015109;BmuPB000672;BmuPB018265;BmuPB005615;BmuPB002920;BmuPB006681;BmuPB021529;BmuPB012021;BmuPB012966;BmuPB002658;BmuPB008842;BmuPB017868;Bmu…
		GO:0004713	415	59	29.5413	1.9972	6.95982e-06	0.00167036	molecular_function:protein tyrosine kinase activity	BmuPB010201;BmuPB018351;BmuPB009120;BmuPB008076;BmuPB004386;BmuPB009568;BmuPB000999;BmuPB017867;BmuPB011517;BmuPB017104;BmuPB016976;BmuPB012886;BmuPB009672;BmuPB011928;BmuPB010773;BmuPB007131;BmuPB009556;BmuPB014101;BmuPB015109;BmuPB000672;BmuPB020228;BmuPB018265;BmuPB005615;BmuPB002920;BmuPB006214;BmuPB019273;BmuPB010165;BmuPB012966;BmuPB018283;BmuPB002658;BmuPB002943;BmuPB008842;BmuPB017541;Bmu…
		GO:0005543	247	39	17.5824	2.21813	2.42347e-05	0.00465306	molecular_function:phospholipid binding	BmuPB016985;BmuPB015227;BmuPB006709;BmuPB014710;BmuPB002020;BmuPB018075;BmuPB009275;BmuPB012909;BmuPB002078;BmuPB000999;BmuPB000444;BmuPB004758;BmuPB019055;BmuPB005348;BmuPB006735;BmuPB017104;BmuPB020609;BmuPB007468;BmuPB015324;BmuPB009195;BmuPB012881;BmuPB010416;BmuPB016218;BmuPB014075;BmuPB007956;BmuPB008822;BmuPB012297;BmuPB011827;BmuPB012490;BmuPB005697;BmuPB016015;BmuPB004419;BmuPB012967;Bmu…
		GO:0004674	211	32	15.0198	2.13052	0.000248415	0.0342978	molecular_function:protein serine/threonine kinase activity	BmuPB011971;BmuPB014883;BmuPB010201;BmuPB016562;BmuPB002020;BmuPB012704;BmuPB002968;BmuPB002528;BmuPB011626;BmuPB017079;BmuPB000999;BmuPB013065;BmuPB011517;BmuPB000078;BmuPB017104;BmuPB012886;BmuPB009672;BmuPB016218;BmuPB020197;BmuPB016882;BmuPB009101;BmuPB020228;BmuPB005660;BmuPB006214;BmuPB006681;BmuPB010165;BmuPB012021;BmuPB004368;BmuPB008916;BmuPB017011;BmuPB002712;BmuPB005740;
		GO:0035556	259	37	18.4366	2.00687	0.000250088	0.0342978	biological_process:intracellular signal transduction	BmuPB018163;BmuPB003508;BmuPB012009;BmuPB013849;BmuPB013786;BmuPB015630;BmuPB003111;BmuPB008822;BmuPB006681;BmuPB005697;BmuPB003746;BmuPB002658;BmuPB003565;BmuPB003164;BmuPB016559;BmuPB018385;BmuPB014937;BmuPB016562;BmuPB013836;BmuPB017522;BmuPB000444;BmuPB013907;BmuPB011011;BmuPB013701;BmuPB009137;BmuPB012881;BmuPB020197;BmuPB007956;BmuPB009176;BmuPB011827;BmuPB006032;BmuPB011558;BmuPB001395;Bmu…
	KEGG	map04015	247	49	17.5824	2.78688	6.14158e-09	1.05328e-06	Rap1_signaling_pathway	BmuPB013436;BmuPB009609;BmuPB013267;BmuPB009107;BmuPB012463;BmuPB018163;BmuPB016562;BmuPB002020;BmuPB014940;BmuPB006515;BmuPB011068;BmuPB017522;BmuPB011508;BmuPB001547;BmuPB004717;BmuPB000999;BmuPB000444;BmuPB017867;BmuPB016760;BmuPB019055;BmuPB011011;BmuPB013701;BmuPB016786;BmuPB013554;BmuPB020197;BmuPB016092;BmuPB019048;BmuPB004700;BmuPB009556;BmuPB011704;BmuPB005615;BmuPB006681;BmuPB019417;Bmu…
		map04510	205	42	14.5927	2.87815	2.74629e-08	3.13993e-06	Focal_adhesion	BmuPB009609;BmuPB013267;BmuPB009107;BmuPB016562;BmuPB002020;BmuPB006515;BmuPB012067;BmuPB011672;BmuPB001547;BmuPB004717;BmuPB011185;BmuPB000999;BmuPB003309;BmuPB011136;BmuPB017335;BmuPB012919;BmuPB012060;BmuPB017919;BmuPB010392;BmuPB016786;BmuPB015371;BmuPB016751;BmuPB013554;BmuPB001028;BmuPB017920;BmuPB020197;BmuPB016092;BmuPB003502;BmuPB004700;BmuPB009556;BmuPB014101;BmuPB018568;BmuPB019273;Bmu…
		map04611	118	29	8.3997	3.4525	1.40052e-07	1.20095e-05	Platelet_activation	BmuPB016985;BmuPB016092;BmuPB015244;BmuPB009609;BmuPB011704;BmuPB018163;BmuPB010201;BmuPB007695;BmuPB002020;BmuPB014940;BmuPB006214;BmuPB006681;BmuPB004717;BmuPB011266;BmuPB016759;BmuPB003746;BmuPB000999;BmuPB003309;BmuPB001395;BmuPB017867;BmuPB019055;BmuPB011011;BmuPB017868;BmuPB009686;BmuPB013701;BmuPB016786;BmuPB016326;BmuPB000556;BmuPB016751;
		map04725	113	27	8.04378	3.35663	5.8845e-07	3.36688e-05	Cholinergic_synapse	BmuPB018887;BmuPB020197;BmuPB016092;BmuPB003283;BmuPB015244;BmuPB009609;BmuPB018599;BmuPB010181;BmuPB011704;BmuPB018163;BmuPB010201;BmuPB007695;BmuPB016951;BmuPB016562;BmuPB002020;BmuPB006687;BmuPB011026;BmuPB003746;BmuPB000999;BmuPB001395;BmuPB008540;BmuPB011011;BmuPB013701;BmuPB005020;BmuPB020257;BmuPB009894;BmuPB001360;
		map04360	175	35	12.4572	2.80963	5.88959e-07	3.36688e-05	Axon_guidance	BmuPB009609;BmuPB019063;BmuPB016562;BmuPB009120;BmuPB008125;BmuPB017866;BmuPB013751;BmuPB003189;BmuPB000444;BmuPB001746;BmuPB015458;BmuPB010610;BmuPB001028;BmuPB016154;BmuPB016092;BmuPB007488;BmuPB019048;BmuPB004700;BmuPB011704;BmuPB014101;BmuPB009693;BmuPB019273;BmuPB006681;BmuPB010680;BmuPB011558;BmuPB006086;BmuPB011026;BmuPB015571;BmuPB012480;BmuPB011778;BmuPB015853;BmuPB017524;BmuPB011421;Bmu…
		map04010	310	50	22.067	2.26583	1.2133e-06	5.94517e-05	MAPK_signaling_pathway	BmuPB009667;BmuPB013267;BmuPB011848;BmuPB017850;BmuPB010201;BmuPB012704;BmuPB000999;BmuPB011777;BmuPB017867;BmuPB011136;BmuPB010770;BmuPB010392;BmuPB003297;BmuPB015581;BmuPB004700;BmuPB009556;BmuPB020228;BmuPB005615;BmuPB002920;BmuPB016678;BmuPB018283;BmuPB017868;BmuPB013557;BmuPB003989;BmuPB013447;BmuPB006313;BmuPB018887;BmuPB004731;BmuPB010181;BmuPB012564;BmuPB002020;BmuPB016562;BmuPB006515;Bmu…
		map04540	91	23	6.47773	3.55063	1.71126e-06	7.33704e-05	Gap_junction	BmuPB020197;BmuPB016092;BmuPB015244;BmuPB011704;BmuPB018163;BmuPB010201;BmuPB007695;BmuPB016562;BmuPB006515;BmuPB012067;BmuPB006214;BmuPB018906;BmuPB011558;BmuPB003746;BmuPB001395;BmuPB009987;BmuPB011011;BmuPB000624;BmuPB013701;BmuPB009894;BmuPB011928;BmuPB013554;BmuPB004764;
		map04670	117	26	8.32851	3.12181	2.96548e-06	0.000108864	Leukocyte_transendothelial_migration	BmuPB020197;BmuPB009609;BmuPB005825;BmuPB004700;BmuPB011704;BmuPB014101;BmuPB016562;BmuPB009622;BmuPB017522;BmuPB001547;BmuPB004717;BmuPB019417;BmuPB011888;BmuPB000444;BmuPB021233;BmuPB017867;BmuPB013907;BmuPB015657;BmuPB017868;BmuPB012738;BmuPB001313;BmuPB016786;BmuPB016326;BmuPB001047;BmuPB017047;BmuPB016751;
		map04925	95	23	6.76247	3.40112	3.17387e-06	0.000108864	Aldosterone_synthesis_and_secretion	BmuPB011581;BmuPB020197;BmuPB015244;BmuPB016882;BmuPB018163;BmuPB010201;BmuPB007695;BmuPB016562;BmuPB004701;BmuPB005608;BmuPB003746;BmuPB011026;BmuPB001395;BmuPB021180;BmuPB014097;BmuPB016760;BmuPB011011;BmuPB013701;BmuPB010770;BmuPB003297;BmuPB009894;BmuPB016911;BmuPB000369;
		map04724	121	26	8.61325	3.0186	5.00884e-06	0.000156185	Glutamatergic_synapse	BmuPB020197;BmuPB016092;BmuPB005385;BmuPB015244;BmuPB016337;BmuPB010181;BmuPB011704;BmuPB018163;BmuPB003109;BmuPB017847;BmuPB010201;BmuPB007695;BmuPB005747;BmuPB016562;BmuPB006687;BmuPB016869;BmuPB003746;BmuPB001395;BmuPB011011;BmuPB013701;BmuPB001627;BmuPB005020;BmuPB017104;BmuPB012088;BmuPB001360;BmuPB016218;
		map04934	162	31	11.5318	2.68822	6.79031e-06	0.00019409	Cushing_s_syndrome	BmuPB000099;BmuPB018163;BmuPB010201;BmuPB007695;BmuPB015314;BmuPB001622;BmuPB005608;BmuPB015893;BmuPB021180;BmuPB016560;BmuPB011011;BmuPB013701;BmuPB010770;BmuPB011841;BmuPB003297;BmuPB018871;BmuPB021263;BmuPB016092;BmuPB003111;BmuPB015244;BmuPB011845;BmuPB011704;BmuPB018568;BmuPB013003;BmuPB003746;BmuPB011026;BmuPB013846;BmuPB001395;BmuPB011778;BmuPB016326;BmuPB009894;
		map04070	101	23	7.18957	3.19908	7.55152e-06	0.000199244	Phosphatidylinositol_signaling_system	BmuPB020197;BmuPB015244;BmuPB001895;BmuPB009609;BmuPB008537;BmuPB018133;BmuPB018163;BmuPB007695;BmuPB011827;BmuPB015945;BmuPB016562;BmuPB005697;BmuPB016081;BmuPB007135;BmuPB009910;BmuPB000444;BmuPB016760;BmuPB017355;BmuPB016157;BmuPB018989;BmuPB001863;BmuPB018267;BmuPB014598;
		map04722	120	25	8.54206	2.92669	1.18789e-05	0.000291034	Neurotrophin_signaling_pathway	BmuPB016092;BmuPB012175;BmuPB008822;BmuPB009609;BmuPB009107;BmuPB004700;BmuPB020228;BmuPB002020;BmuPB012067;BmuPB012704;BmuPB009120;BmuPB016678;BmuPB011558;BmuPB011026;BmuPB000999;BmuPB000444;BmuPB004419;BmuPB017867;BmuPB016760;BmuPB017868;BmuPB003989;BmuPB016326;BmuPB020257;BmuPB005644;BmuPB009528;
		map04810	220	37	15.6605	2.36264	1.2871e-05	0.000294318	Regulation_of_actin_cytoskeleton	BmuPB004731;BmuPB009609;BmuPB018351;BmuPB006515;BmuPB018075;BmuPB004677;BmuPB011508;BmuPB001547;BmuPB004717;BmuPB011973;BmuPB012909;BmuPB009910;BmuPB008540;BmuPB017335;BmuPB012060;BmuPB007468;BmuPB015371;BmuPB016751;BmuPB013554;BmuPB001028;BmuPB016154;BmuPB016092;BmuPB008546;BmuPB004700;BmuPB014101;BmuPB016951;BmuPB005615;BmuPB019273;BmuPB007591;BmuPB011558;BmuPB018283;BmuPB014542;BmuPB012738;Bmu…
		map04916	98	22	6.97602	3.15366	1.42305e-05	0.000305067	Melanogenesis	BmuPB020197;BmuPB016092;BmuPB003111;BmuPB011704;BmuPB000099;BmuPB018163;BmuPB010201;BmuPB015314;BmuPB016562;BmuPB015893;BmuPB011558;BmuPB003746;BmuPB011026;BmuPB013702;BmuPB001395;BmuPB011778;BmuPB016760;BmuPB011011;BmuPB013701;BmuPB011841;BmuPB001360;BmuPB021263;
		map05206	143	28	10.1793	2.75068	1.68396e-05	0.000339763	MicroRNAs_in_cancer	BmuPB013267;BmuPB004324;BmuPB016562;BmuPB006515;BmuPB012067;BmuPB009120;BmuPB000444;BmuPB007089;BmuPB011841;BmuPB013554;BmuPB001028;BmuPB020197;BmuPB003742;BmuPB001930;BmuPB020228;BmuPB011227;BmuPB018568;BmuPB011975;BmuPB017549;BmuPB011558;BmuPB013702;BmuPB018283;BmuPB011632;BmuPB021178;BmuPB012738;BmuPB020257;BmuPB005644;BmuPB004764;
		map05165	354	51	25.1991	2.02388	2.07067e-05	0.000394578	Human_papillomavirus_infection	BmuPB013267;BmuPB000099;BmuPB010201;BmuPB001973;BmuPB011800;BmuPB000999;BmuPB003259;BmuPB017014;BmuPB004736;BmuPB016560;BmuPB022320;BmuPB017335;BmuPB015371;BmuPB003111;BmuPB014101;BmuPB006681;BmuPB000471;BmuPB013846;BmuPB015571;BmuPB011778;BmuPB009427;BmuPB013447;BmuPB019023;BmuPB009609;BmuPB020608;BmuPB015314;BmuPB002020;BmuPB006515;BmuPB012067;BmuPB005779;BmuPB011672;BmuPB015893;BmuPB003309;Bmu…
		map05205	208	35	14.8062	2.36387	2.38367e-05	0.000395829	Proteoglycans_in_cancer	BmuPB009609;BmuPB013267;BmuPB000099;BmuPB010201;BmuPB007695;BmuPB016562;BmuPB002020;BmuPB012067;BmuPB003774;BmuPB004717;BmuPB015893;BmuPB000999;BmuPB000444;BmuPB017867;BmuPB011136;BmuPB017335;BmuPB011841;BmuPB010392;BmuPB015371;BmuPB017664;BmuPB020197;BmuPB016092;BmuPB015244;BmuPB004700;BmuPB009556;BmuPB014101;BmuPB005615;BmuPB018568;BmuPB000094;BmuPB011558;BmuPB011026;BmuPB011778;BmuPB017868;Bmu…
		map04713	102	22	7.26075	3.02999	2.4209e-05	0.000395829	Circadian_entrainment	BmuPB020197;BmuPB016092;BmuPB015244;BmuPB011704;BmuPB018163;BmuPB010201;BmuPB007695;BmuPB020228;BmuPB016562;BmuPB006687;BmuPB006214;BmuPB003746;BmuPB011026;BmuPB017667;BmuPB001395;BmuPB016760;BmuPB011011;BmuPB013701;BmuPB005020;BmuPB012088;BmuPB003297;BmuPB001360;
		map04926	126	25	8.96917	2.78733	2.42344e-05	0.000395829	Relaxin_signaling_pathway	BmuPB016092;BmuPB009609;BmuPB013267;BmuPB011704;BmuPB018163;BmuPB010201;BmuPB016562;BmuPB002020;BmuPB012067;BmuPB006687;BmuPB006681;BmuPB011266;BmuPB011558;BmuPB003746;BmuPB000999;BmuPB003309;BmuPB001395;BmuPB017867;BmuPB009895;BmuPB011011;BmuPB017868;BmuPB013701;BmuPB012919;BmuPB005020;BmuPB001360;
		map05230	59	16	4.19985	3.80966	2.95132e-05	0.000460137	Central_carbon_metabolism_in_cancer	BmuPB016092;BmuPB018283;BmuPB008616;BmuPB000999;BmuPB009609;BmuPB008043;BmuPB002020;BmuPB005615;BmuPB008617;BmuPB006515;BmuPB009427;BmuPB011929;BmuPB011508;BmuPB009528;BmuPB001465;BmuPB011558;
		map04745	28	11	1.99315	5.51891	3.3462e-05	0.000499021	Phototransduction_fly	BmuPB011026;BmuPB017104;BmuPB004701;BmuPB004717;BmuPB012372;BmuPB016760;BmuPB018163;BmuPB016911;BmuPB007695;BmuPB016562;BmuPB016218;
		map04550	136	26	9.68101	2.68567	4.19725e-05	0.000553714	Signaling_pathways_regulating_pluripotency_of_stem_cells	BmuPB009609;BmuPB008631;BmuPB000099;BmuPB002020;BmuPB012067;BmuPB003638;BmuPB011508;BmuPB015893;BmuPB014166;BmuPB000999;BmuPB017867;BmuPB016560;BmuPB011841;BmuPB000276;BmuPB016092;BmuPB003111;BmuPB009556;BmuPB005615;BmuPB008464;BmuPB018263;BmuPB011558;BmuPB018283;BmuPB013846;BmuPB011778;BmuPB003623;BmuPB017868;
		map04910	146	27	10.3928	2.59794	4.06272e-05	0.000553714	Insulin_signaling_pathway	BmuPB000101;BmuPB009609;BmuPB009107;BmuPB010201;BmuPB015945;BmuPB002020;BmuPB008617;BmuPB012067;BmuPB009993;BmuPB006147;BmuPB011661;BmuPB000999;BmuPB017007;BmuPB012009;BmuPB016760;BmuPB005860;BmuPB016092;BmuPB004762;BmuPB016882;BmuPB006681;BmuPB011975;BmuPB018396;BmuPB011558;BmuPB008616;BmuPB003266;BmuPB005644;BmuPB007443;
		map04071	122	24	8.68443	2.76357	3.91278e-05	0.000553714	Sphingolipid_signaling_pathway	BmuPB020197;BmuPB016092;BmuPB004731;BmuPB009609;BmuPB018616;BmuPB004700;BmuPB011704;BmuPB004324;BmuPB018163;BmuPB010082;BmuPB016562;BmuPB002020;BmuPB006681;BmuPB001973;BmuPB016426;BmuPB011266;BmuPB011558;BmuPB000999;BmuPB017867;BmuPB017014;BmuPB017868;BmuPB001294;BmuPB020257;BmuPB013447;
		map04310	142	26	10.1081	2.57219	6.36817e-05	0.000742876	Wnt_signaling_pathway	BmuPB011471;BmuPB019644;BmuPB000099;BmuPB018163;BmuPB010201;BmuPB015314;BmuPB016562;BmuPB015893;BmuPB006788;BmuPB013065;BmuPB016560;BmuPB011841;BmuPB017061;BmuPB015581;BmuPB021263;BmuPB020197;BmuPB003111;BmuPB004700;BmuPB002920;BmuPB018568;BmuPB006608;BmuPB011026;BmuPB013702;BmuPB013846;BmuPB011778;BmuPB001392;
		map04914	94	20	6.69128	2.98896	6.49746e-05	0.000742876	Progesteronemediated_oocyte_maturation	BmuPB016092;BmuPB004743;BmuPB009609;BmuPB009556;BmuPB011704;BmuPB010201;BmuPB002020;BmuPB012704;BmuPB004386;BmuPB011558;BmuPB003746;BmuPB000999;BmuPB001395;BmuPB017867;BmuPB011011;BmuPB017868;BmuPB011632;BmuPB013701;BmuPB012879;BmuPB009672;
		map04971	71	17	5.05405	3.36364	6.44663e-05	0.000742876	Gastric_acid_secretion	BmuPB020197;BmuPB015244;BmuPB018599;BmuPB011704;BmuPB018163;BmuPB010201;BmuPB007695;BmuPB016562;BmuPB003746;BmuPB011026;BmuPB001395;BmuPB016760;BmuPB011011;BmuPB013701;BmuPB012738;BmuPB011271;BmuPB000556;
		map04014	280	41	19.9315	2.05705	7.18167e-05	0.000794617	Ras_signaling_pathway	BmuPB013267;BmuPB010201;BmuPB006687;BmuPB011068;BmuPB009120;BmuPB000999;BmuPB016760;BmuPB007131;BmuPB008171;BmuPB004700;BmuPB009556;BmuPB005615;BmuPB019273;BmuPB016678;BmuPB018283;BmuPB003989;BmuPB006313;BmuPB014981;BmuPB009609;BmuPB002020;BmuPB016562;BmuPB006515;BmuPB012067;BmuPB017522;BmuPB011508;BmuPB017079;BmuPB000444;BmuPB005020;BmuPB012446;BmuPB012881;BmuPB001028;BmuPB013554;BmuPB016092;Bmu…
		map01521	88	19	6.26418	3.03312	8.24739e-05	0.000884017	EGFR_tyrosine_kinase_inhibitor_resistance	BmuPB020197;BmuPB016092;BmuPB012175;BmuPB009609;BmuPB013267;BmuPB009556;BmuPB016562;BmuPB002020;BmuPB006515;BmuPB012067;BmuPB011508;BmuPB011558;BmuPB018283;BmuPB000999;BmuPB000444;BmuPB007089;BmuPB020257;BmuPB013554;BmuPB004764;
		map04140	147	26	10.464	2.4847	9.6988e-05	0.000978438	Autophagy_animal	BmuPB009609;BmuPB010201;BmuPB007695;BmuPB002020;BmuPB017618;BmuPB010081;BmuPB004722;BmuPB008543;BmuPB019639;BmuPB000999;BmuPB015939;BmuPB016092;BmuPB016553;BmuPB002291;BmuPB018616;BmuPB009556;BmuPB011975;BmuPB013761;BmuPB011558;BmuPB011575;BmuPB014602;BmuPB008541;BmuPB012894;BmuPB008842;BmuPB008916;BmuPB020257;
		map05215	97	20	6.90484	2.89652	9.44358e-05	0.000978438	Prostate_cancer	BmuPB016092;BmuPB009609;BmuPB009556;BmuPB018351;BmuPB015314;BmuPB002020;BmuPB005615;BmuPB006515;BmuPB012067;BmuPB018568;BmuPB011508;BmuPB011558;BmuPB005643;BmuPB013702;BmuPB000999;BmuPB020257;BmuPB005644;BmuPB013554;BmuPB021263;BmuPB004764;
		map04921	158	27	11.2471	2.40063	0.000148529	0.00141515	Oxytocin_signaling_pathway	BmuPB003283;BmuPB000101;BmuPB018163;BmuPB010201;BmuPB007695;BmuPB016562;BmuPB004717;BmuPB011777;BmuPB016760;BmuPB011011;BmuPB013701;BmuPB015581;BmuPB020197;BmuPB016092;BmuPB015244;BmuPB011704;BmuPB018568;BmuPB011266;BmuPB016565;BmuPB011558;BmuPB003746;BmuPB011026;BmuPB004368;BmuPB001395;BmuPB008842;BmuPB001360;BmuPB000556;
		map04270	133	24	9.46746	2.535	0.000144558	0.00141515	Vascular_smooth_muscle_contraction	BmuPB004731;BmuPB018163;BmuPB010201;BmuPB007695;BmuPB016562;BmuPB015852;BmuPB016759;BmuPB016760;BmuPB011011;BmuPB013701;BmuPB012446;BmuPB016092;BmuPB020197;BmuPB015244;BmuPB006214;BmuPB017675;BmuPB011558;BmuPB008691;BmuPB003746;BmuPB001395;BmuPB009894;BmuPB005457;BmuPB000556;BmuPB003235;
		map04930	48	13	3.41683	3.8047	0.000161357	0.00149583	Type_II_diabetes_mellitus	BmuPB018887;BmuPB016092;BmuPB008616;BmuPB009609;BmuPB012009;BmuPB010181;BmuPB008617;BmuPB009427;BmuPB006681;BmuPB005644;BmuPB003297;BmuPB018396;BmuPB005412;
		map04370	56	14	3.9863	3.51203	0.000187719	0.00155636	VEGF_signaling_pathway	BmuPB020197;BmuPB016092;BmuPB000999;BmuPB000444;BmuPB009609;BmuPB013267;BmuPB017867;BmuPB004700;BmuPB014101;BmuPB017868;BmuPB016562;BmuPB002020;BmuPB011266;BmuPB011558;
		map04730	63	15	4.48458	3.34479	0.000178205	0.00155636	Longterm_depression	BmuPB020197;BmuPB016092;BmuPB004731;BmuPB015244;BmuPB009556;BmuPB011845;BmuPB010181;BmuPB011704;BmuPB018163;BmuPB007695;BmuPB016562;BmuPB006214;BmuPB009894;BmuPB001360;BmuPB011558;
		map05214	71	16	5.05405	3.16578	0.000190122	0.00155636	Glioma	BmuPB020197;BmuPB016092;BmuPB009609;BmuPB009556;BmuPB016562;BmuPB002020;BmuPB006515;BmuPB012067;BmuPB018568;BmuPB011558;BmuPB011026;BmuPB000999;BmuPB000444;BmuPB016760;BmuPB013554;BmuPB004764;
		map04933	103	20	7.33194	2.72779	0.000190575	0.00155636	AGERAGE_signaling_pathway_in_diabetic_complications	BmuPB003833;BmuPB016092;BmuPB009609;BmuPB013267;BmuPB004700;BmuPB018163;BmuPB011827;BmuPB016562;BmuPB002020;BmuPB018568;BmuPB006681;BmuPB011266;BmuPB000999;BmuPB003309;BmuPB000444;BmuPB017867;BmuPB017868;BmuPB012919;BmuPB020257;BmuPB015581;
		map05032	94	19	6.69128	2.83952	0.000173939	0.00155636	Morphine_addiction	BmuPB018887;BmuPB020197;BmuPB010181;BmuPB011704;BmuPB010201;BmuPB016562;BmuPB006687;BmuPB001622;BmuPB003746;BmuPB019238;BmuPB001395;BmuPB011517;BmuPB006682;BmuPB011011;BmuPB013701;BmuPB005020;BmuPB017104;BmuPB001360;BmuPB016218;
		map01522	95	19	6.76247	2.80963	0.000195731	0.0015613	Endocrine_resistance	BmuPB016092;BmuPB009609;BmuPB009556;BmuPB014101;BmuPB010201;BmuPB002020;BmuPB003232;BmuPB012067;BmuPB018568;BmuPB011558;BmuPB003746;BmuPB000999;BmuPB001395;BmuPB017867;BmuPB011011;BmuPB017868;BmuPB013701;BmuPB020257;BmuPB016075;
		map04720	64	15	4.55577	3.29253	0.00020646	0.00160945	Longterm_potentiation	BmuPB020197;BmuPB016092;BmuPB015244;BmuPB018163;BmuPB010201;BmuPB007695;BmuPB016562;BmuPB012704;BmuPB011558;BmuPB011026;BmuPB013702;BmuPB016760;BmuPB011011;BmuPB012088;BmuPB016326;
		map04931	104	20	7.40312	2.70156	0.000213044	0.00162387	Insulin_resistance	BmuPB000101;BmuPB009609;BmuPB002020;BmuPB014801;BmuPB016626;BmuPB012704;BmuPB006681;BmuPB021535;BmuPB017900;BmuPB011266;BmuPB008856;BmuPB000999;BmuPB003266;BmuPB017007;BmuPB012009;BmuPB005860;BmuPB005644;BmuPB013447;BmuPB000574;BmuPB009166;
		map04666	96	19	6.83365	2.78036	0.000219877	0.00163952	Fc_gamma_Rmediated_phagocytosis	BmuPB020197;BmuPB016092;BmuPB014075;BmuPB009609;BmuPB017360;BmuPB004700;BmuPB015945;BmuPB012490;BmuPB016562;BmuPB002020;BmuPB004677;BmuPB011558;BmuPB009910;BmuPB000999;BmuPB000444;BmuPB014542;BmuPB016786;BmuPB002707;BmuPB016154;
		map04923	58	14	4.12866	3.39093	0.000255862	0.00186725	Regulation_of_lipolysis_in_adipocytes	BmuPB003746;BmuPB016356;BmuPB000999;BmuPB001395;BmuPB016882;BmuPB009609;BmuPB020959;BmuPB011704;BmuPB010201;BmuPB019648;BmuPB011011;BmuPB002020;BmuPB013701;BmuPB006214;
		map04211	90	18	6.40655	2.80963	0.000283894	0.00198726	Longevity_regulating_pathway	BmuPB012175;BmuPB000101;BmuPB009609;BmuPB009556;BmuPB010201;BmuPB002020;BmuPB011975;BmuPB012732;BmuPB008543;BmuPB003746;BmuPB000999;BmuPB001395;BmuPB018888;BmuPB008842;BmuPB011011;BmuPB013701;BmuPB008916;BmuPB021192;
		map04520	75	16	5.33879	2.99693	0.00032417	0.00222381	Adherens_junction	BmuPB016092;BmuPB004700;BmuPB009556;BmuPB015314;BmuPB005615;BmuPB002920;BmuPB004717;BmuPB006147;BmuPB019417;BmuPB011973;BmuPB013702;BmuPB005860;BmuPB001047;BmuPB005376;BmuPB002707;BmuPB021263;
		map05418	152	25	10.8199	2.31055	0.000387671	0.00241766	Fluid_shear_stress_and_atherosclerosis	BmuPB009667;BmuPB009609;BmuPB009125;BmuPB013267;BmuPB002020;BmuPB003774;BmuPB004717;BmuPB011888;BmuPB005643;BmuPB000999;BmuPB017867;BmuPB016760;BmuPB017335;BmuPB001313;BmuPB013554;BmuPB004700;BmuPB014101;BmuPB006681;BmuPB011266;BmuPB017868;BmuPB020257;BmuPB005644;BmuPB013447;BmuPB018385;BmuPB004764;
		map04261	152	25	10.8199	2.31055	0.000387671	0.00241766	Adrenergic_signaling_in_cardiomyocytes	BmuPB018599;BmuPB018163;BmuPB010201;BmuPB016562;BmuPB002020;BmuPB001973;BmuPB015852;BmuPB000999;BmuPB011777;BmuPB017867;BmuPB017014;BmuPB016760;BmuPB011011;BmuPB001140;BmuPB013701;BmuPB011581;BmuPB016092;BmuPB011704;BmuPB020228;BmuPB016565;BmuPB003746;BmuPB011026;BmuPB001395;BmuPB017868;BmuPB020257;
		map05110	53	13	3.77275	3.44577	0.000367209	0.00241766	Vibrio_cholerae_infection	BmuPB003746;BmuPB019645;BmuPB000444;BmuPB001279;BmuPB004702;BmuPB018599;BmuPB010201;BmuPB016562;BmuPB013701;BmuPB013749;BmuPB011241;BmuPB004717;BmuPB011229;
		map04371	152	25	10.8199	2.31055	0.000387671	0.00241766	Apelin_signaling_pathway	BmuPB000101;BmuPB018163;BmuPB010201;BmuPB007695;BmuPB002020;BmuPB006687;BmuPB005643;BmuPB011800;BmuPB000999;BmuPB016760;BmuPB011011;BmuPB013701;BmuPB005020;BmuPB006849;BmuPB016092;BmuPB015244;BmuPB016882;BmuPB011704;BmuPB018568;BmuPB011266;BmuPB011558;BmuPB003746;BmuPB001395;BmuPB016075;BmuPB000556;
		map04927	69	15	4.91169	3.05394	0.000413273	0.0025313	Cortisol_synthesis_and_secretion	BmuPB015244;BmuPB018163;BmuPB010201;BmuPB007695;BmuPB001622;BmuPB005608;BmuPB013003;BmuPB003746;BmuPB001395;BmuPB021180;BmuPB011011;BmuPB013701;BmuPB010770;BmuPB003297;BmuPB009894;
		map04062	181	28	12.8843	2.17319	0.00042513	0.00255824	Chemokine_signaling_pathway	BmuPB012175;BmuPB020610;BmuPB009609;BmuPB018163;BmuPB010201;BmuPB002020;BmuPB012067;BmuPB006687;BmuPB001547;BmuPB000999;BmuPB012700;BmuPB011517;BmuPB011011;BmuPB013701;BmuPB005020;BmuPB017104;BmuPB012886;BmuPB016218;BmuPB016092;BmuPB004700;BmuPB011704;BmuPB014101;BmuPB006681;BmuPB011558;BmuPB003746;BmuPB001395;BmuPB016326;BmuPB005644;
		map00562	72	15	5.12524	2.92669	0.000607679	0.00359369	Inositol_phosphate_metabolism	BmuPB001895;BmuPB018133;BmuPB018163;BmuPB014890;BmuPB011827;BmuPB015945;BmuPB016081;BmuPB007135;BmuPB009910;BmuPB000444;BmuPB017355;BmuPB016157;BmuPB017861;BmuPB018989;BmuPB014598;
		map04750	103	19	7.33194	2.5914	0.000684041	0.00388434	Inflammatory_mediator_regulation_of_TRP_channels	BmuPB020197;BmuPB015244;BmuPB009609;BmuPB018163;BmuPB003100;BmuPB010201;BmuPB007695;BmuPB016562;BmuPB010801;BmuPB003746;BmuPB011026;BmuPB001395;BmuPB000444;BmuPB017867;BmuPB016760;BmuPB011011;BmuPB017868;BmuPB013701;BmuPB003989;
		map04919	114	20	8.11496	2.46458	0.0006908	0.00388434	Thyroid_hormone_signaling_pathway	BmuPB020197;BmuPB016092;BmuPB009609;BmuPB018163;BmuPB010201;BmuPB011827;BmuPB016562;BmuPB002020;BmuPB003232;BmuPB017511;BmuPB018568;BmuPB004717;BmuPB009106;BmuPB011558;BmuPB017743;BmuPB013702;BmuPB000999;BmuPB000444;BmuPB017335;BmuPB002599;
		map04213	65	14	4.62695	3.02575	0.000685766	0.00388434	Longevity_regulating_pathway_multiple_species	BmuPB012175;BmuPB000101;BmuPB009609;BmuPB009556;BmuPB010201;BmuPB002020;BmuPB011975;BmuPB012732;BmuPB003746;BmuPB000999;BmuPB001395;BmuPB011011;BmuPB013701;BmuPB021195;
		map04072	162	25	11.5318	2.16792	0.000978732	0.0054146	Phospholipase_D_signaling_pathway	BmuPB013436;BmuPB004731;BmuPB009609;BmuPB018163;BmuPB016562;BmuPB002020;BmuPB006515;BmuPB012067;BmuPB011068;BmuPB009910;BmuPB000999;BmuPB000444;BmuPB011011;BmuPB013701;BmuPB013554;BmuPB016092;BmuPB012718;BmuPB008537;BmuPB005697;BmuPB011558;BmuPB003746;BmuPB000277;BmuPB001395;BmuPB018267;BmuPB004764;
		map04721	68	14	4.8405	2.89226	0.00100385	0.0054654	Synaptic_vesicle_cycle	BmuPB018887;BmuPB001279;BmuPB016641;BmuPB010181;BmuPB011241;BmuPB019366;BmuPB020967;BmuPB009190;BmuPB004560;BmuPB001736;BmuPB016737;BmuPB013749;BmuPB003171;BmuPB004489;
		map04723	152	24	10.8199	2.21813	0.00115906	0.00606218	Retrograde_endocannabinoid_signaling	BmuPB018887;BmuPB010181;BmuPB018163;BmuPB010201;BmuPB007695;BmuPB019648;BmuPB016562;BmuPB006687;BmuPB004701;BmuPB017867;BmuPB011011;BmuPB006682;BmuPB013701;BmuPB005020;BmuPB018241;BmuPB020197;BmuPB016092;BmuPB015244;BmuPB011704;BmuPB003746;BmuPB001395;BmuPB017868;BmuPB001360;BmuPB016911;
		map04915	137	22	9.75219	2.2559	0.00113972	0.00606218	Estrogen_signaling_pathway	BmuPB009609;BmuPB018163;BmuPB010201;BmuPB007695;BmuPB002020;BmuPB012067;BmuPB000999;BmuPB016760;BmuPB011011;BmuPB013701;BmuPB021195;BmuPB016092;BmuPB015244;BmuPB018616;BmuPB011704;BmuPB011266;BmuPB011558;BmuPB003746;BmuPB001395;BmuPB003412;BmuPB020257;BmuPB001360;
		map04668	111	19	7.90141	2.40463	0.00116648	0.00606218	TNF_signaling_pathway	BmuPB001390;BmuPB016092;BmuPB009609;BmuPB020228;BmuPB002020;BmuPB001987;BmuPB009275;BmuPB016816;BmuPB014537;BmuPB000999;BmuPB012009;BmuPB017867;BmuPB006571;BmuPB017868;BmuPB013557;BmuPB001294;BmuPB005644;BmuPB013447;BmuPB016075;
		map05221	70	14	4.98287	2.80963	0.00127833	0.00644805	Acute_myeloid_leukemia	BmuPB016092;BmuPB008002;BmuPB009609;BmuPB002802;BmuPB015314;BmuPB002020;BmuPB012067;BmuPB018568;BmuPB011558;BmuPB017667;BmuPB000999;BmuPB003412;BmuPB005644;BmuPB021263;
		map04928	102	18	7.26075	2.47908	0.00127182	0.00644805	Parathyroid_hormone_synthesis_secretion_and_action	BmuPB020197;BmuPB016092;BmuPB004731;BmuPB015244;BmuPB011704;BmuPB018163;BmuPB010201;BmuPB007695;BmuPB016562;BmuPB005615;BmuPB011558;BmuPB003746;BmuPB001395;BmuPB011011;BmuPB013701;BmuPB020257;BmuPB009894;BmuPB000369;
		map04912	93	17	6.6201	2.56794	0.0014836	0.00726962	GnRH_signaling_pathway	BmuPB016092;BmuPB015244;BmuPB018163;BmuPB010201;BmuPB007695;BmuPB016562;BmuPB012067;BmuPB011558;BmuPB003746;BmuPB011026;BmuPB001395;BmuPB017867;BmuPB016760;BmuPB011011;BmuPB017868;BmuPB013701;BmuPB009894;
		map04728	133	21	9.46746	2.21813	0.00172992	0.00824114	Dopaminergic_synapse	BmuPB018887;BmuPB010181;BmuPB018163;BmuPB010201;BmuPB007695;BmuPB016562;BmuPB002020;BmuPB006687;BmuPB001973;BmuPB000999;BmuPB017867;BmuPB017014;BmuPB016760;BmuPB005020;BmuPB020197;BmuPB015244;BmuPB011704;BmuPB011026;BmuPB017868;BmuPB001360;BmuPB019949;
		map04150	162	24	11.5318	2.0812	0.00177834	0.00835577	mTOR_signaling_pathway	BmuPB009609;BmuPB000099;BmuPB016562;BmuPB002020;BmuPB012067;BmuPB012704;BmuPB015893;BmuPB000999;BmuPB011841;BmuPB007948;BmuPB001465;BmuPB020197;BmuPB016092;BmuPB003111;BmuPB002291;BmuPB009556;BmuPB011975;BmuPB013761;BmuPB011558;BmuPB014602;BmuPB011778;BmuPB008916;BmuPB005644;BmuPB013447;
		map05231	107	18	7.61667	2.36324	0.00182405	0.00845473	Choline_metabolism_in_cancer	BmuPB020197;BmuPB016092;BmuPB009609;BmuPB008537;BmuPB004700;BmuPB016562;BmuPB002020;BmuPB006515;BmuPB012067;BmuPB005697;BmuPB011558;BmuPB009910;BmuPB000999;BmuPB000444;BmuPB018267;BmuPB002707;BmuPB013554;BmuPB004764;
		map04022	169	25	12.0301	2.07812	0.00203816	0.00932118	cGMPPKG_signaling_pathway	BmuPB004731;BmuPB018163;BmuPB007695;BmuPB002020;BmuPB015852;BmuPB017743;BmuPB000999;BmuPB016760;BmuPB011011;BmuPB013701;BmuPB016786;BmuPB015581;BmuPB011581;BmuPB016092;BmuPB015244;BmuPB011704;BmuPB006214;BmuPB011266;BmuPB011558;BmuPB008691;BmuPB003746;BmuPB001395;BmuPB009894;BmuPB005457;BmuPB000556;
		map04068	136	21	9.68101	2.1692	0.00208032	0.00938881	FoxO_signaling_pathway	BmuPB012175;BmuPB000101;BmuPB009609;BmuPB002020;BmuPB012067;BmuPB004386;BmuPB000999;BmuPB017867;BmuPB007089;BmuPB016092;BmuPB009556;BmuPB002920;BmuPB018568;BmuPB012732;BmuPB011558;BmuPB013702;BmuPB009735;BmuPB017868;BmuPB015706;BmuPB001627;BmuPB005644;
		map05225	171	25	12.1724	2.05382	0.002153	0.00959062	Hepatocellular_carcinoma	BmuPB010066;BmuPB009609;BmuPB002228;BmuPB000099;BmuPB015314;BmuPB016562;BmuPB002020;BmuPB012067;BmuPB004717;BmuPB015893;BmuPB000999;BmuPB000444;BmuPB016560;BmuPB016119;BmuPB018234;BmuPB011841;BmuPB021263;BmuPB020197;BmuPB016092;BmuPB003111;BmuPB009556;BmuPB018568;BmuPB011558;BmuPB013846;BmuPB011778;
		map05211	75	14	5.33879	2.62232	0.00224869	0.00966577	Renal_cell_carcinoma	BmuPB016092;BmuPB009609;BmuPB013267;BmuPB009107;BmuPB004700;BmuPB002020;BmuPB012067;BmuPB019273;BmuPB011558;BmuPB013702;BmuPB000999;BmuPB016326;BmuPB001028;BmuPB013554;
		map04972	100	17	7.11839	2.38818	0.00228259	0.00966577	Pancreatic_secretion	BmuPB011581;BmuPB020197;BmuPB015244;BmuPB004700;BmuPB018599;BmuPB018163;BmuPB007695;BmuPB016562;BmuPB018567;BmuPB008691;BmuPB003746;BmuPB001395;BmuPB011011;BmuPB013701;BmuPB012446;BmuPB016326;BmuPB011271;
		map04970	100	17	7.11839	2.38818	0.00228259	0.00966577	Salivary_secretion	BmuPB011581;BmuPB020197;BmuPB015244;BmuPB018163;BmuPB010201;BmuPB007695;BmuPB016562;BmuPB006214;BmuPB015852;BmuPB008691;BmuPB003746;BmuPB001395;BmuPB016760;BmuPB011011;BmuPB013701;BmuPB003171;BmuPB011271;
		map05210	91	16	6.47773	2.47	0.00256122	0.0107134	Colorectal_cancer	BmuPB016092;BmuPB009609;BmuPB004700;BmuPB015314;BmuPB002020;BmuPB012067;BmuPB018568;BmuPB011068;BmuPB011558;BmuPB000277;BmuPB000999;BmuPB013846;BmuPB016560;BmuPB007089;BmuPB020257;BmuPB021263;
		map05223	68	13	4.8405	2.68567	0.00264515	0.0109311	Nonsmall_cell_lung_cancer	BmuPB020197;BmuPB016092;BmuPB012175;BmuPB009609;BmuPB016562;BmuPB002020;BmuPB012067;BmuPB018568;BmuPB017522;BmuPB011558;BmuPB000999;BmuPB000444;BmuPB010407;
		map04911	82	15	5.83708	2.56978	0.00310894	0.0125455	Insulin_secretion	BmuPB020197;BmuPB015244;BmuPB018163;BmuPB010201;BmuPB016562;BmuPB005412;BmuPB008691;BmuPB003746;BmuPB011026;BmuPB001395;BmuPB004560;BmuPB011011;BmuPB013701;BmuPB003171;BmuPB009894;
		map05213	62	12	4.4134	2.71899	0.00347108	0.013844	Endometrial_cancer	BmuPB016092;BmuPB012175;BmuPB013846;BmuPB000999;BmuPB009609;BmuPB016560;BmuPB015314;BmuPB002020;BmuPB012067;BmuPB018568;BmuPB011558;BmuPB021263;
		map04210	142	21	10.1081	2.07754	0.00391733	0.0154442	Apoptosis	BmuPB009609;BmuPB018377;BmuPB007695;BmuPB002020;BmuPB009881;BmuPB009275;BmuPB004717;BmuPB000999;BmuPB007089;BmuPB022114;BmuPB016092;BmuPB015244;BmuPB003502;BmuPB018616;BmuPB011558;BmuPB014537;BmuPB001294;BmuPB003989;BmuPB020257;BmuPB005644;BmuPB013447;
		map04012	88	15	6.26418	2.39457	0.00424364	0.0163547	ErbB_signaling_pathway	BmuPB020197;BmuPB016092;BmuPB009609;BmuPB014101;BmuPB016562;BmuPB002020;BmuPB012067;BmuPB019273;BmuPB009120;BmuPB011558;BmuPB011026;BmuPB000999;BmuPB000444;BmuPB008717;BmuPB001028;
		map04011	32	8	2.27788	3.51203	0.00433324	0.0165144	MAPK_signaling_pathway_yeast	BmuPB016092;BmuPB017867;BmuPB017868;BmuPB016562;BmuPB018062;BmuPB006687;BmuPB016081;BmuPB009910;
		map04727	90	15	6.40655	2.34135	0.00484056	0.0182452	GABAergic_synapse	BmuPB018887;BmuPB020197;BmuPB010181;BmuPB011704;BmuPB010201;BmuPB016562;BmuPB006687;BmuPB013665;BmuPB003746;BmuPB001395;BmuPB006682;BmuPB011011;BmuPB013701;BmuPB005020;BmuPB001360;
		map05130	58	11	4.12866	2.6643	0.00572506	0.0213445	Pathogenic_Escherichia_coli_infection	BmuPB009987;BmuPB016562;BmuPB000624;BmuPB009622;BmuPB012738;BmuPB004677;BmuPB009120;BmuPB018577;BmuPB004717;BmuPB018906;BmuPB018385;
		map00051	34	8	2.42025	3.30544	0.00590735	0.0217873	Fructose_and_mannose_metabolism	BmuPB008616;BmuPB008176;BmuPB008043;BmuPB008617;BmuPB017511;BmuPB013587;BmuPB003719;BmuPB007443;
		map04340	51	10	3.63038	2.75453	0.00673955	0.0243333	Hedgehog_signaling_pathway	BmuPB015458;BmuPB006052;BmuPB010201;BmuPB000274;BmuPB018568;BmuPB017104;BmuPB020257;BmuPB000094;BmuPB011928;BmuPB016218;
		map04152	129	19	9.18272	2.0691	0.00702462	0.0250984	AMPK_signaling_pathway	BmuPB012175;BmuPB000101;BmuPB009609;BmuPB002020;BmuPB017511;BmuPB001973;BmuPB015852;BmuPB000999;BmuPB017014;BmuPB016882;BmuPB009556;BmuPB008043;BmuPB018568;BmuPB011975;BmuPB004368;BmuPB003266;BmuPB008842;BmuPB008916;BmuPB007443;
		map05146	115	17	8.18615	2.07668	0.00803736	0.0284208	Amoebiasis	BmuPB020197;BmuPB008182;BmuPB009609;BmuPB018163;BmuPB014101;BmuPB010201;BmuPB016562;BmuPB011672;BmuPB010608;BmuPB019639;BmuPB003309;BmuPB009895;BmuPB008184;BmuPB011011;BmuPB012919;BmuPB001047;BmuPB009894;
		map05132	88	14	6.26418	2.23493	0.00866032	0.030005	Salmonella_infection	BmuPB016794;BmuPB016092;BmuPB004700;BmuPB004677;BmuPB002002;BmuPB004717;BmuPB017073;BmuPB019639;BmuPB001975;BmuPB017867;BmuPB017868;BmuPB006735;BmuPB011136;BmuPB010392;
		map00521	9	4	0.640655	6.24361	0.00860791	0.030005	Streptomycin_biosynthesis	BmuPB008616;BmuPB014890;BmuPB014598;BmuPB008617;
		map04664	78	13	5.55234	2.34135	0.00911803	0.0312749	Fc_epsilon_RI_signaling_pathway	BmuPB016092;BmuPB009609;BmuPB008776;BmuPB004700;BmuPB016562;BmuPB002020;BmuPB012067;BmuPB011558;BmuPB000999;BmuPB000444;BmuPB017867;BmuPB009686;BmuPB017868;
		map04136	38	8	2.70499	2.9575	0.0103129	0.0346796	Autophagy_other	BmuPB016553;BmuPB010081;BmuPB017618;BmuPB004722;BmuPB011975;BmuPB008543;BmuPB013761;BmuPB011575;
		map04139	23	6	1.63723	3.66473	0.0109192	0.036362	Mitophagy_yeast	BmuPB018284;BmuPB017867;BmuPB016105;BmuPB017868;BmuPB016562;BmuPB009910;
		map00515	24	6	1.70841	3.51203	0.0128946	0.0421224	Mannose_type_Oglycan_biosynthesis	BmuPB007151;BmuPB010939;BmuPB005866;BmuPB019347;BmuPB007645;BmuPB005657;
		map04744	25	6	1.7796	3.37155	0.0151071	0.0488843	Phototransduction	BmuPB009380;BmuPB006687;BmuPB003164;BmuPB016559;BmuPB012886;BmuPB016760;
		map04130	33	7	2.34907	2.97991	0.0154414	0.049499	SNARE_interactions_in_vesicular_transport	BmuPB020921;BmuPB009661;BmuPB004560;BmuPB006822;BmuPB003171;BmuPB019366;BmuPB004489;
		map05217	63	11	4.48458	2.45285	0.0156763	0.0497867	Basal_cell_carcinoma	BmuPB013846;BmuPB003111;BmuPB011778;BmuPB006052;BmuPB016560;BmuPB000099;BmuPB015314;BmuPB000274;BmuPB011841;BmuPB015893;BmuPB021263;
hypothalamus vs brain	GO	GO:0005515	4194	419	291.455	1.43762	8.86456e-10	8.28837e-07	molecular_function:protein binding	BmuPB016695;BmuPB018163;BmuPB002209;BmuPB019003;BmuPB009568;BmuPB011100;BmuPB005860;BmuPB016176;BmuPB019814;BmuPB011878;BmuPB021461;BmuPB011500;BmuPB010398;BmuPB018276;BmuPB018577;BmuPB014937;BmuPB017672;BmuPB011888;BmuPB003134;BmuPB000440;BmuPB017906;BmuPB004750;BmuPB020197;BmuPB007956;BmuPB014537;BmuPB008469;BmuPB016100;BmuPB021981;BmuPB009120;BmuPB015857;BmuPB006735;BmuPB004084;BmuPB009923;Bmu…
		GO:0006468	688	98	47.8114	2.04972	2.55188e-09	1.193e-06	biological_process:protein phosphorylation	BmuPB001463;BmuPB010201;BmuPB018351;BmuPB012704;BmuPB017070;BmuPB004386;BmuPB009568;BmuPB017538;BmuPB000999;BmuPB017867;BmuPB013065;BmuPB010995;BmuPB011517;BmuPB005860;BmuPB012886;BmuPB000574;BmuPB011928;BmuPB020683;BmuPB016882;BmuPB014101;BmuPB000672;BmuPB018265;BmuPB005615;BmuPB003088;BmuPB002920;BmuPB006681;BmuPB021529;BmuPB010398;BmuPB012021;BmuPB012966;BmuPB017009;BmuPB008842;BmuPB017868;Bmu…
		GO:0004672	503	77	34.9551	2.20282	6.06982e-09	1.89176e-06	molecular_function:protein kinase activity	BmuPB010201;BmuPB018351;BmuPB012704;BmuPB009120;BmuPB017070;BmuPB004386;BmuPB009568;BmuPB017538;BmuPB000999;BmuPB017867;BmuPB010995;BmuPB011517;BmuPB014010;BmuPB016546;BmuPB012886;BmuPB000574;BmuPB005657;BmuPB011928;BmuPB010773;BmuPB007131;BmuPB009556;BmuPB014101;BmuPB000672;BmuPB020228;BmuPB018265;BmuPB005615;BmuPB003088;BmuPB006214;BmuPB002920;BmuPB006681;BmuPB010165;BmuPB010398;BmuPB012966;Bmu…
		GO:0004713	415	64	28.8397	2.21916	8.09631e-08	1.89251e-05	molecular_function:protein tyrosine kinase activity	BmuPB010201;BmuPB018351;BmuPB009120;BmuPB004386;BmuPB009568;BmuPB017538;BmuPB000999;BmuPB017867;BmuPB011517;BmuPB014010;BmuPB016546;BmuPB012886;BmuPB011928;BmuPB010773;BmuPB007131;BmuPB009556;BmuPB014101;BmuPB000672;BmuPB020228;BmuPB018265;BmuPB005615;BmuPB003088;BmuPB002920;BmuPB006214;BmuPB010165;BmuPB012966;BmuPB018283;BmuPB002943;BmuPB008842;BmuPB017541;BmuPB008916;BmuPB019852;BmuPB001263;Bmu…
		GO:0005543	247	39	17.1648	2.27209	1.77359e-05	0.00331662	molecular_function:phospholipid binding	BmuPB016985;BmuPB019371;BmuPB015227;BmuPB004048;BmuPB000991;BmuPB014710;BmuPB002020;BmuPB009275;BmuPB018846;BmuPB012909;BmuPB002078;BmuPB000999;BmuPB000444;BmuPB004758;BmuPB005348;BmuPB011100;BmuPB006735;BmuPB020609;BmuPB004158;BmuPB007468;BmuPB009195;BmuPB010970;BmuPB012881;BmuPB010416;BmuPB016218;BmuPB014075;BmuPB007956;BmuPB008822;BmuPB011389;BmuPB005697;BmuPB016015;BmuPB004419;BmuPB020366;Bmu…
		GO:0004674	211	35	14.6631	2.38695	2.20833e-05	0.00344132	molecular_function:protein serine/threonine kinase activity	BmuPB011971;BmuPB014883;BmuPB010201;BmuPB016562;BmuPB002020;BmuPB004389;BmuPB012704;BmuPB002968;BmuPB010207;BmuPB002528;BmuPB017079;BmuPB000999;BmuPB013065;BmuPB011517;BmuPB000078;BmuPB012886;BmuPB016218;BmuPB020683;BmuPB020197;BmuPB016882;BmuPB007479;BmuPB009101;BmuPB020228;BmuPB005660;BmuPB006214;BmuPB006681;BmuPB010165;BmuPB012021;BmuPB012547;BmuPB005179;BmuPB017039;BmuPB008916;BmuPB002712;Bmu…
		GO:0016192	69	16	4.79504	3.33678	0.000110881	0.0148105	biological_process:vesicle-mediated transport	BmuPB012785;BmuPB016190;BmuPB016641;BmuPB009343;BmuPB019366;BmuPB020967;BmuPB009190;BmuPB013518;BmuPB001625;BmuPB010914;BmuPB003171;BmuPB001604;BmuPB018144;BmuPB009868;BmuPB004489;BmuPB019636;
		GO:0005524	1643	159	114.177	1.39257	0.00023264	0.0198725	molecular_function:ATP binding	BmuPB009099;BmuPB001463;BmuPB005353;BmuPB004386;BmuPB008208;BmuPB009568;BmuPB007605;BmuPB000999;BmuPB011517;BmuPB013279;BmuPB005860;BmuPB000574;BmuPB019816;BmuPB012952;BmuPB008918;BmuPB012705;BmuPB000672;BmuPB003088;BmuPB006681;BmuPB010398;BmuPB001489;BmuPB003184;BmuPB008842;BmuPB017868;BmuPB017660;BmuPB011592;BmuPB008002;BmuPB004731;BmuPB014937;BmuPB016562;BmuPB015943;BmuPB018935;BmuPB002003;Bmu…
		GO:0035556	259	37	17.9988	2.0557	0.000199981	0.0198725	biological_process:intracellular signal transduction	BmuPB017685;BmuPB018163;BmuPB018608;BmuPB019530;BmuPB013786;BmuPB015630;BmuPB008822;BmuPB006681;BmuPB005697;BmuPB016559;BmuPB018385;BmuPB017665;BmuPB014892;BmuPB014937;BmuPB016562;BmuPB013836;BmuPB004389;BmuPB017522;BmuPB008804;BmuPB019277;BmuPB021464;BmuPB000444;BmuPB011011;BmuPB013701;BmuPB012881;BmuPB020197;BmuPB007956;BmuPB007479;BmuPB009176;BmuPB006032;BmuPB011558;BmuPB001395;BmuPB014602;Bmu…
		GO:0043565	603	69	41.9044	1.6466	0.000268784	0.0209427	molecular_function:sequence-specific DNA binding	BmuPB015234;BmuPB013632;BmuPB006105;BmuPB017061;BmuPB011591;BmuPB007180;BmuPB017938;BmuPB008464;BmuPB000066;BmuPB002226;BmuPB009550;BmuPB003805;BmuPB007227;BmuPB015111;BmuPB007194;BmuPB008522;BmuPB001171;BmuPB003350;BmuPB011549;BmuPB008646;BmuPB009217;BmuPB014728;BmuPB000555;BmuPB016397;BmuPB004743;BmuPB003487;BmuPB012748;BmuPB013003;BmuPB018263;BmuPB003931;BmuPB009914;BmuPB012171;BmuPB016772;Bmu…
		GO:0006836	44	11	3.0577	3.59747	0.000736913	0.0405302	biological_process:neurotransmitter transport	BmuPB011549;BmuPB003921;BmuPB011593;BmuPB000863;BmuPB013941;BmuPB011544;BmuPB019366;BmuPB020584;BmuPB011579;BmuPB009318;BmuPB006792;
	KEGG	map04015	247	52	17.1648	3.02945	1.46958e-10	2.51298e-08	Rap1_signaling_pathway	BmuPB016649;BmuPB013436;BmuPB009107;BmuPB012463;BmuPB018163;BmuPB016562;BmuPB002020;BmuPB006515;BmuPB004389;BmuPB009092;BmuPB017522;BmuPB019277;BmuPB001547;BmuPB004717;BmuPB008029;BmuPB000999;BmuPB000444;BmuPB017867;BmuPB016760;BmuPB011011;BmuPB013701;BmuPB014903;BmuPB006610;BmuPB016546;BmuPB016786;BmuPB013554;BmuPB020197;BmuPB016092;BmuPB000582;BmuPB019048;BmuPB004700;BmuPB009556;BmuPB011704;Bmu…
		map04725	113	30	7.85274	3.82032	1.23473e-08	1.16089e-06	Cholinergic_synapse	BmuPB018887;BmuPB020197;BmuPB016092;BmuPB015244;BmuPB018599;BmuPB010181;BmuPB011704;BmuPB018163;BmuPB010201;BmuPB007695;BmuPB016951;BmuPB016562;BmuPB002020;BmuPB004389;BmuPB019277;BmuPB011026;BmuPB000999;BmuPB001395;BmuPB008540;BmuPB011011;BmuPB018420;BmuPB013701;BmuPB014903;BmuPB020942;BmuPB006610;BmuPB014027;BmuPB020257;BmuPB009894;BmuPB001360;BmuPB011771;
		map04510	205	42	14.2461	2.94817	1.478e-08	1.16089e-06	Focal_adhesion	BmuPB009107;BmuPB016562;BmuPB002020;BmuPB006515;BmuPB004389;BmuPB011672;BmuPB001547;BmuPB004717;BmuPB014230;BmuPB011185;BmuPB000999;BmuPB011136;BmuPB012919;BmuPB014903;BmuPB012060;BmuPB006610;BmuPB012206;BmuPB010392;BmuPB016786;BmuPB015371;BmuPB016751;BmuPB006792;BmuPB013554;BmuPB001028;BmuPB017920;BmuPB020197;BmuPB016092;BmuPB004700;BmuPB009556;BmuPB014101;BmuPB008018;BmuPB018568;BmuPB004779;Bmu…
		map04071	122	31	8.47818	3.65645	1.6972e-08	1.16089e-06	Sphingolipid_signaling_pathway	BmuPB006210;BmuPB020197;BmuPB016092;BmuPB006483;BmuPB014876;BmuPB004731;BmuPB004700;BmuPB011704;BmuPB004324;BmuPB018163;BmuPB010082;BmuPB016562;BmuPB002020;BmuPB004389;BmuPB006681;BmuPB019277;BmuPB001973;BmuPB011266;BmuPB011558;BmuPB000999;BmuPB017867;BmuPB017868;BmuPB014903;BmuPB020942;BmuPB006610;BmuPB012596;BmuPB020257;BmuPB004158;BmuPB013447;BmuPB010096;BmuPB009976;
		map04010	310	54	21.5429	2.50663	2.61687e-08	1.49162e-06	MAPK_signaling_pathway	BmuPB011848;BmuPB017850;BmuPB010201;BmuPB012704;BmuPB018608;BmuPB000999;BmuPB011777;BmuPB017867;BmuPB011136;BmuPB010770;BmuPB016546;BmuPB010392;BmuPB015581;BmuPB020683;BmuPB004700;BmuPB009556;BmuPB020228;BmuPB005615;BmuPB002920;BmuPB004779;BmuPB016678;BmuPB018283;BmuPB017009;BmuPB017868;BmuPB020942;BmuPB013557;BmuPB015111;BmuPB013447;BmuPB006313;BmuPB018887;BmuPB016649;BmuPB004731;BmuPB010181;Bmu…
		map04971	71	22	4.93402	4.45884	1.0855e-07	5.30343e-06	Gastric_acid_secretion	BmuPB020197;BmuPB015244;BmuPB012887;BmuPB018599;BmuPB011704;BmuPB018163;BmuPB010201;BmuPB007695;BmuPB016562;BmuPB004389;BmuPB019277;BmuPB014555;BmuPB011026;BmuPB001395;BmuPB003569;BmuPB012560;BmuPB016760;BmuPB011011;BmuPB013701;BmuPB012738;BmuPB013074;BmuPB011271;
		map04070	101	26	7.01882	3.70433	1.82881e-07	7.81817e-06	Phosphatidylinositol_signaling_system	BmuPB020197;BmuPB015244;BmuPB001895;BmuPB008537;BmuPB018133;BmuPB018163;BmuPB007695;BmuPB016562;BmuPB004389;BmuPB005697;BmuPB016081;BmuPB019277;BmuPB007135;BmuPB009910;BmuPB000444;BmuPB015242;BmuPB016760;BmuPB016157;BmuPB014903;BmuPB006610;BmuPB007791;BmuPB018989;BmuPB001863;BmuPB016182;BmuPB005699;BmuPB018267;
		map04925	95	25	6.60186	3.78681	2.18633e-07	8.30804e-06	Aldosterone_synthesis_and_secretion	BmuPB011581;BmuPB020197;BmuPB015244;BmuPB016882;BmuPB018163;BmuPB010201;BmuPB007695;BmuPB016562;BmuPB004389;BmuPB019277;BmuPB004701;BmuPB005608;BmuPB011026;BmuPB001395;BmuPB003569;BmuPB021180;BmuPB014097;BmuPB016760;BmuPB011011;BmuPB013701;BmuPB010770;BmuPB014027;BmuPB009894;BmuPB013074;BmuPB011771;
		map05205	208	38	14.4546	2.62892	8.72953e-07	2.81155e-05	Proteoglycans_in_cancer	BmuPB016649;BmuPB000099;BmuPB010201;BmuPB007695;BmuPB016562;BmuPB002020;BmuPB004389;BmuPB018608;BmuPB004717;BmuPB000999;BmuPB000444;BmuPB012560;BmuPB017867;BmuPB011136;BmuPB014903;BmuPB006610;BmuPB011841;BmuPB010392;BmuPB015371;BmuPB017664;BmuPB020197;BmuPB016092;BmuPB015244;BmuPB004700;BmuPB009556;BmuPB014101;BmuPB020598;BmuPB005615;BmuPB018568;BmuPB000094;BmuPB011558;BmuPB019623;BmuPB011026;Bmu…
		map04360	175	34	12.1613	2.79575	9.043e-07	2.81155e-05	Axon_guidance	BmuPB016649;BmuPB016562;BmuPB009120;BmuPB008125;BmuPB014058;BmuPB017866;BmuPB013751;BmuPB003189;BmuPB000444;BmuPB014903;BmuPB006610;BmuPB010610;BmuPB004618;BmuPB001028;BmuPB016154;BmuPB000603;BmuPB016092;BmuPB007126;BmuPB019048;BmuPB004700;BmuPB011704;BmuPB014101;BmuPB009693;BmuPB006681;BmuPB011558;BmuPB011026;BmuPB015571;BmuPB012480;BmuPB001609;BmuPB020942;BmuPB015111;BmuPB011421;BmuPB014507;Bmu…
		map04916	98	24	6.81034	3.52405	1.12449e-06	3.08411e-05	Melanogenesis	BmuPB020197;BmuPB016092;BmuPB011704;BmuPB000099;BmuPB018163;BmuPB010201;BmuPB015314;BmuPB008247;BmuPB016562;BmuPB012434;BmuPB004389;BmuPB019277;BmuPB011558;BmuPB019623;BmuPB011026;BmuPB013702;BmuPB001395;BmuPB016760;BmuPB011011;BmuPB013701;BmuPB020942;BmuPB011841;BmuPB014027;BmuPB001360;
		map04022	169	33	11.7444	2.80986	1.17232e-06	3.08411e-05	cGMPPKG_signaling_pathway	BmuPB004731;BmuPB018163;BmuPB007695;BmuPB002020;BmuPB021981;BmuPB003044;BmuPB019277;BmuPB015852;BmuPB017743;BmuPB008838;BmuPB000999;BmuPB003569;BmuPB016760;BmuPB011011;BmuPB013701;BmuPB016786;BmuPB014027;BmuPB015581;BmuPB011771;BmuPB011581;BmuPB016092;BmuPB015244;BmuPB011704;BmuPB006214;BmuPB011266;BmuPB011558;BmuPB008691;BmuPB001395;BmuPB004545;BmuPB012596;BmuPB009894;BmuPB013074;BmuPB005457;
		map04810	220	39	15.2885	2.55093	1.52963e-06	3.62475e-05	Regulation_of_actin_cytoskeleton	BmuPB016649;BmuPB004731;BmuPB018351;BmuPB006515;BmuPB004677;BmuPB001547;BmuPB004717;BmuPB014230;BmuPB008029;BmuPB011973;BmuPB012909;BmuPB009910;BmuPB012560;BmuPB008540;BmuPB014903;BmuPB012060;BmuPB006610;BmuPB007468;BmuPB015371;BmuPB016751;BmuPB013554;BmuPB001028;BmuPB016154;BmuPB016092;BmuPB015556;BmuPB004700;BmuPB014101;BmuPB016951;BmuPB005615;BmuPB001940;BmuPB007591;BmuPB011558;BmuPB018283;Bmu…
		map04140	147	30	10.2155	2.93671	1.5898e-06	3.62475e-05	Autophagy_animal	BmuPB016649;BmuPB010201;BmuPB007695;BmuPB002020;BmuPB004813;BmuPB019928;BmuPB017618;BmuPB008543;BmuPB019639;BmuPB000999;BmuPB007977;BmuPB014903;BmuPB006610;BmuPB016092;BmuPB016553;BmuPB002291;BmuPB009556;BmuPB017529;BmuPB013761;BmuPB011558;BmuPB011575;BmuPB014602;BmuPB008541;BmuPB012894;BmuPB008842;BmuPB008916;BmuPB020942;BmuPB020257;BmuPB016182;BmuPB017013;
		map04928	102	24	7.08831	3.38585	2.04867e-06	4.37904e-05	Parathyroid_hormone_synthesis_secretion_and_action	BmuPB020197;BmuPB016092;BmuPB004731;BmuPB002665;BmuPB016284;BmuPB015244;BmuPB011704;BmuPB018163;BmuPB010201;BmuPB007695;BmuPB016562;BmuPB005615;BmuPB004389;BmuPB019277;BmuPB011558;BmuPB001395;BmuPB012092;BmuPB012091;BmuPB011011;BmuPB013701;BmuPB014027;BmuPB020257;BmuPB004158;BmuPB009894;
		map04666	96	23	6.67135	3.44758	2.54492e-06	5.11979e-05	Fc_gamma_Rmediated_phagocytosis	BmuPB020197;BmuPB016092;BmuPB014075;BmuPB017360;BmuPB004700;BmuPB016562;BmuPB002020;BmuPB004389;BmuPB004677;BmuPB011558;BmuPB009910;BmuPB000999;BmuPB000444;BmuPB014542;BmuPB010630;BmuPB014903;BmuPB006610;BmuPB016786;BmuPB004158;BmuPB005699;BmuPB010970;BmuPB002707;BmuPB016154;
		map04911	82	21	5.69845	3.68521	2.7943e-06	5.15079e-05	Insulin_secretion	BmuPB020197;BmuPB015244;BmuPB018163;BmuPB010201;BmuPB019270;BmuPB016562;BmuPB004389;BmuPB019277;BmuPB005412;BmuPB008691;BmuPB011026;BmuPB001395;BmuPB018866;BmuPB003569;BmuPB011011;BmuPB013701;BmuPB014027;BmuPB003171;BmuPB009894;BmuPB013074;BmuPB011771;
		map04261	152	30	10.563	2.84011	2.86155e-06	5.15079e-05	Adrenergic_signaling_in_cardiomyocytes	BmuPB018599;BmuPB018163;BmuPB010201;BmuPB016562;BmuPB002020;BmuPB019277;BmuPB001973;BmuPB015852;BmuPB007605;BmuPB000999;BmuPB011777;BmuPB012560;BmuPB003569;BmuPB017867;BmuPB016760;BmuPB011011;BmuPB013701;BmuPB014027;BmuPB011771;BmuPB020683;BmuPB011581;BmuPB006483;BmuPB016092;BmuPB011704;BmuPB020228;BmuPB011026;BmuPB001395;BmuPB017868;BmuPB020257;BmuPB013074;
		map04540	91	22	6.32389	3.47887	3.6609e-06	6.26013e-05	Gap_junction	BmuPB020197;BmuPB016092;BmuPB015244;BmuPB011704;BmuPB018163;BmuPB010201;BmuPB007695;BmuPB016562;BmuPB006515;BmuPB004389;BmuPB006214;BmuPB019277;BmuPB011558;BmuPB001395;BmuPB011011;BmuPB013701;BmuPB020942;BmuPB009894;BmuPB011928;BmuPB013554;BmuPB004764;BmuPB013515;
		map04730	63	18	4.37807	4.1114	3.88053e-06	6.31972e-05	Longterm_depression	BmuPB020197;BmuPB016092;BmuPB004731;BmuPB015244;BmuPB009556;BmuPB011845;BmuPB010181;BmuPB011704;BmuPB018163;BmuPB007695;BmuPB016562;BmuPB020942;BmuPB004389;BmuPB006214;BmuPB019277;BmuPB009894;BmuPB001360;BmuPB011558;
		map05165	354	52	24.6006	2.11377	4.32786e-06	6.72786e-05	Human_papillomavirus_infection	BmuPB000099;BmuPB010201;BmuPB001973;BmuPB011800;BmuPB000999;BmuPB004736;BmuPB016560;BmuPB012091;BmuPB022320;BmuPB014903;BmuPB012206;BmuPB015371;BmuPB006792;BmuPB014101;BmuPB008018;BmuPB018103;BmuPB006681;BmuPB012685;BmuPB000471;BmuPB013846;BmuPB015571;BmuPB020942;BmuPB014615;BmuPB009427;BmuPB013447;BmuPB019023;BmuPB015314;BmuPB002020;BmuPB006515;BmuPB011672;BmuPB014230;BmuPB012919;BmuPB012060;Bmu…
		map04720	64	18	4.44757	4.04716	4.6675e-06	6.94037e-05	Longterm_potentiation	BmuPB020197;BmuPB016092;BmuPB015244;BmuPB018163;BmuPB010201;BmuPB007695;BmuPB016562;BmuPB004389;BmuPB012704;BmuPB019277;BmuPB011558;BmuPB011026;BmuPB012547;BmuPB013702;BmuPB016760;BmuPB011011;BmuPB020942;BmuPB012088;
		map04670	117	25	8.13071	3.07476	5.56543e-06	7.93073e-05	Leukocyte_transendothelial_migration	BmuPB020197;BmuPB004700;BmuPB011704;BmuPB014101;BmuPB016562;BmuPB004603;BmuPB004389;BmuPB017522;BmuPB001547;BmuPB004717;BmuPB019417;BmuPB008029;BmuPB011888;BmuPB005375;BmuPB000444;BmuPB021233;BmuPB017867;BmuPB017868;BmuPB014903;BmuPB012738;BmuPB006610;BmuPB016786;BmuPB001047;BmuPB017047;BmuPB016751;
		map05230	59	17	4.1001	4.14624	6.47738e-06	8.86106e-05	Central_carbon_metabolism_in_cancer	BmuPB016092;BmuPB018283;BmuPB008616;BmuPB000999;BmuPB008043;BmuPB002020;BmuPB005615;BmuPB008617;BmuPB006515;BmuPB014903;BmuPB020942;BmuPB006610;BmuPB009427;BmuPB011929;BmuPB009528;BmuPB001465;BmuPB011558;
		map04933	103	23	7.15781	3.21327	6.93004e-06	9.11566e-05	AGERAGE_signaling_pathway_in_diabetic_complications	BmuPB016092;BmuPB009393;BmuPB004700;BmuPB018163;BmuPB020598;BmuPB008247;BmuPB016562;BmuPB002020;BmuPB004389;BmuPB018568;BmuPB006681;BmuPB019277;BmuPB011266;BmuPB000999;BmuPB000444;BmuPB017867;BmuPB017868;BmuPB012919;BmuPB014903;BmuPB020942;BmuPB006610;BmuPB020257;BmuPB015581;
		map04724	121	25	8.40868	2.97312	9.20599e-06	0.000116609	Glutamatergic_synapse	BmuPB020197;BmuPB016092;BmuPB005385;BmuPB016661;BmuPB015244;BmuPB010181;BmuPB011704;BmuPB018163;BmuPB003109;BmuPB017847;BmuPB010201;BmuPB007695;BmuPB016562;BmuPB004389;BmuPB019277;BmuPB016869;BmuPB001395;BmuPB011011;BmuPB013701;BmuPB001627;BmuPB012088;BmuPB004158;BmuPB001360;BmuPB011771;BmuPB016218;
		map04919	114	24	7.92223	3.02945	1.04663e-05	0.000127838	Thyroid_hormone_signaling_pathway	BmuPB020197;BmuPB016092;BmuPB018163;BmuPB010201;BmuPB016562;BmuPB002020;BmuPB003232;BmuPB004389;BmuPB018568;BmuPB019277;BmuPB004717;BmuPB009106;BmuPB011558;BmuPB017743;BmuPB013702;BmuPB000999;BmuPB000444;BmuPB012560;BmuPB003569;BmuPB014903;BmuPB020942;BmuPB006610;BmuPB019558;BmuPB013074;
		map04370	56	16	3.89162	4.11139	1.30661e-05	0.00014586	VEGF_signaling_pathway	BmuPB020197;BmuPB016092;BmuPB000999;BmuPB000444;BmuPB017867;BmuPB004700;BmuPB014101;BmuPB017868;BmuPB016562;BmuPB002020;BmuPB014903;BmuPB020942;BmuPB004389;BmuPB006610;BmuPB011266;BmuPB011558;
		map04972	100	22	6.94933	3.16578	1.32212e-05	0.00014586	Pancreatic_secretion	BmuPB011581;BmuPB020197;BmuPB015244;BmuPB004700;BmuPB018599;BmuPB018163;BmuPB007695;BmuPB016562;BmuPB003044;BmuPB004389;BmuPB019277;BmuPB018567;BmuPB008691;BmuPB008838;BmuPB001395;BmuPB003569;BmuPB012560;BmuPB011011;BmuPB013701;BmuPB012446;BmuPB013074;BmuPB011271;
		map04970	100	22	6.94933	3.16578	1.32212e-05	0.00014586	Salivary_secretion	BmuPB011581;BmuPB020197;BmuPB015244;BmuPB018163;BmuPB010201;BmuPB007695;BmuPB016562;BmuPB004389;BmuPB006214;BmuPB019277;BmuPB015852;BmuPB008691;BmuPB001395;BmuPB003569;BmuPB012560;BmuPB016760;BmuPB011011;BmuPB013701;BmuPB003171;BmuPB002801;BmuPB013074;BmuPB011271;
		map04912	93	21	6.46287	3.24933	1.46452e-05	0.000151777	GnRH_signaling_pathway	BmuPB016092;BmuPB015244;BmuPB018163;BmuPB010201;BmuPB007695;BmuPB016562;BmuPB004389;BmuPB019277;BmuPB011558;BmuPB011026;BmuPB001395;BmuPB017867;BmuPB016760;BmuPB011011;BmuPB017868;BmuPB013701;BmuPB020942;BmuPB016546;BmuPB004158;BmuPB009894;BmuPB011771;
		map04728	133	26	9.2426	2.81306	1.44353e-05	0.000151777	Dopaminergic_synapse	BmuPB018887;BmuPB018605;BmuPB010181;BmuPB018163;BmuPB010201;BmuPB007695;BmuPB016562;BmuPB002020;BmuPB005440;BmuPB004389;BmuPB019277;BmuPB001973;BmuPB021464;BmuPB000999;BmuPB017867;BmuPB016760;BmuPB014027;BmuPB011771;BmuPB006483;BmuPB020197;BmuPB015244;BmuPB011704;BmuPB011026;BmuPB017868;BmuPB001360;BmuPB019949;
		map04611	118	24	8.20021	2.92676	1.71438e-05	0.000155096	Platelet_activation	BmuPB016985;BmuPB016092;BmuPB015244;BmuPB011704;BmuPB018163;BmuPB010201;BmuPB007695;BmuPB002020;BmuPB006214;BmuPB006681;BmuPB019277;BmuPB004717;BmuPB011266;BmuPB000999;BmuPB001395;BmuPB017867;BmuPB011011;BmuPB017868;BmuPB013701;BmuPB014903;BmuPB006610;BmuPB016786;BmuPB017006;BmuPB016751;
		map05214	71	18	4.93402	3.64814	1.5548e-05	0.000155096	Glioma	BmuPB020197;BmuPB016092;BmuPB009556;BmuPB016562;BmuPB002020;BmuPB006515;BmuPB004389;BmuPB018568;BmuPB011558;BmuPB011026;BmuPB000999;BmuPB000444;BmuPB016760;BmuPB014903;BmuPB020942;BmuPB006610;BmuPB013554;BmuPB004764;
		map04713	102	22	7.08831	3.1037	1.72329e-05	0.000155096	Circadian_entrainment	BmuPB020197;BmuPB016092;BmuPB015244;BmuPB011704;BmuPB018163;BmuPB010201;BmuPB007695;BmuPB020228;BmuPB016562;BmuPB004389;BmuPB006214;BmuPB019277;BmuPB011026;BmuPB017667;BmuPB001395;BmuPB018866;BmuPB016760;BmuPB011011;BmuPB013701;BmuPB012088;BmuPB001360;BmuPB011771;
		map04926	126	25	8.75615	2.85514	1.67405e-05	0.000155096	Relaxin_signaling_pathway	BmuPB016092;BmuPB009393;BmuPB011704;BmuPB018163;BmuPB010201;BmuPB008247;BmuPB016562;BmuPB002020;BmuPB006681;BmuPB019277;BmuPB011266;BmuPB011558;BmuPB000999;BmuPB001395;BmuPB017867;BmuPB009895;BmuPB011011;BmuPB017868;BmuPB013701;BmuPB012919;BmuPB014903;BmuPB020942;BmuPB006610;BmuPB014027;BmuPB001360;
		map04550	136	26	9.45108	2.75101	2.01984e-05	0.000177124	Signaling_pathways_regulating_pluripotency_of_stem_cells	BmuPB009393;BmuPB008631;BmuPB000099;BmuPB018002;BmuPB002020;BmuPB003638;BmuPB014166;BmuPB000999;BmuPB017867;BmuPB016560;BmuPB014903;BmuPB006610;BmuPB011841;BmuPB006328;BmuPB016092;BmuPB009556;BmuPB020598;BmuPB005615;BmuPB008464;BmuPB018263;BmuPB011558;BmuPB019623;BmuPB018283;BmuPB013846;BmuPB017868;BmuPB020942;
		map04014	280	42	19.4581	2.15848	2.16761e-05	0.000181469	Ras_signaling_pathway	BmuPB010201;BmuPB009120;BmuPB018608;BmuPB000999;BmuPB016760;BmuPB014903;BmuPB007131;BmuPB004700;BmuPB009556;BmuPB005615;BmuPB004779;BmuPB016678;BmuPB018283;BmuPB020942;BmuPB015111;BmuPB006313;BmuPB014981;BmuPB016649;BmuPB002020;BmuPB016562;BmuPB006515;BmuPB004389;BmuPB009092;BmuPB017522;BmuPB008804;BmuPB017079;BmuPB000444;BmuPB006610;BmuPB012446;BmuPB004158;BmuPB012881;BmuPB001028;BmuPB013554;Bmu…
		map04722	120	24	8.33919	2.87798	2.17551e-05	0.000181469	Neurotrophin_signaling_pathway	BmuPB016092;BmuPB008822;BmuPB009107;BmuPB004700;BmuPB020228;BmuPB002020;BmuPB012704;BmuPB009120;BmuPB016678;BmuPB011558;BmuPB012547;BmuPB011026;BmuPB000999;BmuPB000444;BmuPB004419;BmuPB017867;BmuPB016760;BmuPB017868;BmuPB014903;BmuPB020942;BmuPB006610;BmuPB003530;BmuPB020257;BmuPB009528;
		map04931	104	22	7.2273	3.04401	2.23091e-05	0.00018166	Insulin_resistance	BmuPB000101;BmuPB020598;BmuPB002020;BmuPB016626;BmuPB004389;BmuPB012704;BmuPB006681;BmuPB017852;BmuPB017900;BmuPB011266;BmuPB012547;BmuPB000999;BmuPB003266;BmuPB017937;BmuPB005860;BmuPB018561;BmuPB014903;BmuPB000800;BmuPB006610;BmuPB014027;BmuPB013447;BmuPB000574;
		map05206	143	27	9.93754	2.71697	2.65578e-05	0.000211227	MicroRNAs_in_cancer	BmuPB004324;BmuPB016562;BmuPB006515;BmuPB004389;BmuPB009120;BmuPB000444;BmuPB007089;BmuPB011841;BmuPB013804;BmuPB006792;BmuPB013554;BmuPB001028;BmuPB020197;BmuPB003742;BmuPB001930;BmuPB020598;BmuPB020228;BmuPB018568;BmuPB011558;BmuPB013702;BmuPB018283;BmuPB011632;BmuPB020942;BmuPB021178;BmuPB012738;BmuPB020257;BmuPB004764;
		map04910	146	27	10.146	2.66114	3.13302e-05	0.000241325	Insulin_signaling_pathway	BmuPB002847;BmuPB000101;BmuPB009107;BmuPB010201;BmuPB002020;BmuPB008617;BmuPB006147;BmuPB011661;BmuPB011931;BmuPB000999;BmuPB016760;BmuPB005860;BmuPB014903;BmuPB000800;BmuPB006610;BmuPB016092;BmuPB004762;BmuPB016882;BmuPB006681;BmuPB018396;BmuPB011558;BmuPB009865;BmuPB008616;BmuPB003266;BmuPB017937;BmuPB020942;BmuPB007443;
		map05231	107	22	7.43578	2.95867	3.24589e-05	0.000241325	Choline_metabolism_in_cancer	BmuPB020197;BmuPB016092;BmuPB008537;BmuPB004700;BmuPB016562;BmuPB002020;BmuPB006515;BmuPB004389;BmuPB009092;BmuPB005697;BmuPB011558;BmuPB009910;BmuPB000999;BmuPB000444;BmuPB014903;BmuPB020942;BmuPB006610;BmuPB004158;BmuPB018267;BmuPB002707;BmuPB013554;BmuPB004764;
		map05146	115	23	7.99172	2.87798	3.18114e-05	0.000241325	Amoebiasis	BmuPB020197;BmuPB008182;BmuPB018934;BmuPB018163;BmuPB017529;BmuPB014101;BmuPB010201;BmuPB016562;BmuPB004389;BmuPB011672;BmuPB010608;BmuPB019277;BmuPB008029;BmuPB019639;BmuPB009895;BmuPB008184;BmuPB011011;BmuPB012919;BmuPB014903;BmuPB006610;BmuPB012206;BmuPB001047;BmuPB009894;
		map04921	158	28	10.9799	2.55011	3.63606e-05	0.000264581	Oxytocin_signaling_pathway	BmuPB000101;BmuPB018163;BmuPB010201;BmuPB007695;BmuPB016562;BmuPB004389;BmuPB019277;BmuPB004717;BmuPB011777;BmuPB016760;BmuPB011011;BmuPB013701;BmuPB015581;BmuPB011771;BmuPB020683;BmuPB020197;BmuPB016092;BmuPB015244;BmuPB011704;BmuPB018568;BmuPB011266;BmuPB011558;BmuPB011026;BmuPB001395;BmuPB008842;BmuPB020942;BmuPB019558;BmuPB001360;
		map04934	162	28	11.2579	2.48714	5.12898e-05	0.000357982	Cushing_s_syndrome	BmuPB000099;BmuPB018163;BmuPB010201;BmuPB007695;BmuPB015314;BmuPB019277;BmuPB005608;BmuPB021180;BmuPB016560;BmuPB011011;BmuPB013701;BmuPB010770;BmuPB011841;BmuPB014027;BmuPB017010;BmuPB011771;BmuPB016092;BmuPB015244;BmuPB011845;BmuPB011704;BmuPB018849;BmuPB018568;BmuPB013003;BmuPB019623;BmuPB011026;BmuPB013846;BmuPB001395;BmuPB009894;
		map04072	162	28	11.2579	2.48714	5.12898e-05	0.000357982	Phospholipase_D_signaling_pathway	BmuPB016649;BmuPB013436;BmuPB004731;BmuPB018163;BmuPB016562;BmuPB002020;BmuPB006515;BmuPB009092;BmuPB019277;BmuPB009910;BmuPB000999;BmuPB000444;BmuPB011011;BmuPB013701;BmuPB014903;BmuPB006610;BmuPB004158;BmuPB013554;BmuPB016092;BmuPB012718;BmuPB008537;BmuPB005697;BmuPB011558;BmuPB000277;BmuPB001395;BmuPB020942;BmuPB018267;BmuPB004764;
		map01521	88	19	6.11541	3.10691	6.13876e-05	0.000419891	EGFR_tyrosine_kinase_inhibitor_resistance	BmuPB020197;BmuPB016092;BmuPB009556;BmuPB020598;BmuPB016562;BmuPB002020;BmuPB006515;BmuPB004389;BmuPB011558;BmuPB018283;BmuPB000999;BmuPB000444;BmuPB007089;BmuPB014903;BmuPB020942;BmuPB006610;BmuPB020257;BmuPB013554;BmuPB004764;
		map04922	98	20	6.81034	2.93671	7.87659e-05	0.000528195	Glucagon_signaling_pathway	BmuPB002847;BmuPB005268;BmuPB015244;BmuPB000101;BmuPB018163;BmuPB010201;BmuPB007695;BmuPB002020;BmuPB017852;BmuPB019277;BmuPB017900;BmuPB011026;BmuPB013702;BmuPB000999;BmuPB017937;BmuPB016760;BmuPB018561;BmuPB000800;BmuPB009427;BmuPB014027;
		map04066	108	21	7.50527	2.79803	9.66268e-05	0.000635507	HIF1_signaling_pathway	BmuPB020197;BmuPB016092;BmuPB000582;BmuPB009556;BmuPB020598;BmuPB008247;BmuPB016562;BmuPB002020;BmuPB008617;BmuPB004389;BmuPB011266;BmuPB011026;BmuPB013702;BmuPB009865;BmuPB008616;BmuPB000999;BmuPB000444;BmuPB014903;BmuPB008143;BmuPB006610;BmuPB020257;
		map04310	142	25	9.86804	2.53343	0.00010393	0.000670641	Wnt_signaling_pathway	BmuPB011471;BmuPB019644;BmuPB000099;BmuPB018163;BmuPB010201;BmuPB015314;BmuPB016562;BmuPB004389;BmuPB019277;BmuPB013065;BmuPB016560;BmuPB011841;BmuPB017061;BmuPB015581;BmuPB020197;BmuPB004700;BmuPB002920;BmuPB018568;BmuPB006608;BmuPB019623;BmuPB011026;BmuPB013702;BmuPB013846;BmuPB005635;BmuPB011226;
		map04371	152	26	10.563	2.46143	0.000108067	0.000684421	Apelin_signaling_pathway	BmuPB009393;BmuPB016649;BmuPB000101;BmuPB018163;BmuPB010201;BmuPB007695;BmuPB002020;BmuPB019277;BmuPB011800;BmuPB000999;BmuPB007977;BmuPB012560;BmuPB016760;BmuPB011011;BmuPB013701;BmuPB006849;BmuPB016092;BmuPB015244;BmuPB016882;BmuPB011704;BmuPB018568;BmuPB011266;BmuPB011558;BmuPB001395;BmuPB020942;BmuPB016075;
		map04270	133	24	9.2426	2.59667	0.000113246	0.000704184	Vascular_smooth_muscle_contraction	BmuPB004731;BmuPB018163;BmuPB010201;BmuPB007695;BmuPB016562;BmuPB004389;BmuPB019277;BmuPB015852;BmuPB016760;BmuPB011011;BmuPB013701;BmuPB012446;BmuPB011771;BmuPB016092;BmuPB020197;BmuPB015244;BmuPB006214;BmuPB017675;BmuPB011558;BmuPB008691;BmuPB001395;BmuPB009894;BmuPB005457;BmuPB003235;
		map04914	94	19	6.53237	2.90859	0.000130571	0.000783425	Progesteronemediated_oocyte_maturation	BmuPB016092;BmuPB004743;BmuPB009556;BmuPB011704;BmuPB010201;BmuPB002020;BmuPB012704;BmuPB004386;BmuPB011558;BmuPB012547;BmuPB000999;BmuPB001395;BmuPB017867;BmuPB011011;BmuPB017868;BmuPB011632;BmuPB013701;BmuPB014903;BmuPB006610;
		map04930	48	13	3.33568	3.89726	0.000129229	0.000783425	Type_II_diabetes_mellitus	BmuPB018887;BmuPB016092;BmuPB008616;BmuPB006825;BmuPB010181;BmuPB008617;BmuPB014903;BmuPB006610;BmuPB009427;BmuPB006681;BmuPB018396;BmuPB005412;BmuPB011771;
		map04750	103	20	7.15781	2.79415	0.000141816	0.000836227	Inflammatory_mediator_regulation_of_TRP_channels	BmuPB020197;BmuPB015244;BmuPB018163;BmuPB010201;BmuPB007695;BmuPB016562;BmuPB001940;BmuPB004389;BmuPB019277;BmuPB011026;BmuPB001395;BmuPB000444;BmuPB017867;BmuPB016760;BmuPB011011;BmuPB017868;BmuPB013701;BmuPB014903;BmuPB006610;BmuPB016546;
		map01522	95	19	6.60186	2.87798	0.000147137	0.000852898	Endocrine_resistance	BmuPB016092;BmuPB009556;BmuPB014101;BmuPB010201;BmuPB002020;BmuPB003232;BmuPB018568;BmuPB011558;BmuPB000999;BmuPB001395;BmuPB017867;BmuPB011011;BmuPB017868;BmuPB013701;BmuPB014903;BmuPB020942;BmuPB006610;BmuPB020257;BmuPB016075;
		map04152	129	23	8.96463	2.56564	0.000178076	0.00101503	AMPK_signaling_pathway	BmuPB002847;BmuPB000101;BmuPB002020;BmuPB017852;BmuPB001973;BmuPB010007;BmuPB015852;BmuPB011931;BmuPB000999;BmuPB018561;BmuPB014903;BmuPB006610;BmuPB014027;BmuPB006483;BmuPB016882;BmuPB009556;BmuPB008043;BmuPB018568;BmuPB003266;BmuPB017937;BmuPB008842;BmuPB008916;BmuPB007443;
		map05210	91	18	6.32389	2.84635	0.000243599	0.00136575	Colorectal_cancer	BmuPB016092;BmuPB009393;BmuPB004700;BmuPB015314;BmuPB002020;BmuPB018568;BmuPB009092;BmuPB007587;BmuPB011558;BmuPB000277;BmuPB000999;BmuPB013846;BmuPB016560;BmuPB007089;BmuPB014903;BmuPB020942;BmuPB006610;BmuPB020257;
		map04961	45	12	3.1272	3.8373	0.000261454	0.00144221	Endocrine_and_other_factorregulated_calcium_reabsorption	BmuPB020197;BmuPB002665;BmuPB003569;BmuPB016641;BmuPB018163;BmuPB010201;BmuPB016562;BmuPB013701;BmuPB004389;BmuPB019277;BmuPB013074;BmuPB020967;
		map04927	69	15	4.79504	3.12824	0.000326406	0.00174423	Cortisol_synthesis_and_secretion	BmuPB015244;BmuPB018163;BmuPB010201;BmuPB007695;BmuPB019277;BmuPB005608;BmuPB013003;BmuPB001395;BmuPB021180;BmuPB011011;BmuPB013701;BmuPB010770;BmuPB014027;BmuPB009894;BmuPB011771;
		map04918	70	15	4.86453	3.08355	0.00037259	0.00193069	Thyroid_hormone_synthesis	BmuPB014087;BmuPB020197;BmuPB015244;BmuPB018163;BmuPB010201;BmuPB007695;BmuPB016562;BmuPB004389;BmuPB019277;BmuPB001395;BmuPB003569;BmuPB011011;BmuPB013701;BmuPB014027;BmuPB013074;
		map00562	72	15	5.00352	2.99789	0.000481949	0.00242392	Inositol_phosphate_metabolism	BmuPB001895;BmuPB018133;BmuPB018163;BmuPB014890;BmuPB016081;BmuPB019277;BmuPB007135;BmuPB009910;BmuPB000444;BmuPB016157;BmuPB006610;BmuPB007791;BmuPB018989;BmuPB016182;BmuPB005699;
		map05215	97	18	6.74085	2.67029	0.000476715	0.00242392	Prostate_cancer	BmuPB016092;BmuPB009556;BmuPB018351;BmuPB015314;BmuPB002020;BmuPB005615;BmuPB006515;BmuPB018568;BmuPB011558;BmuPB013702;BmuPB000999;BmuPB014903;BmuPB020942;BmuPB006610;BmuPB014027;BmuPB020257;BmuPB013554;BmuPB004764;
		map04745	28	9	1.94581	4.62532	0.000491467	0.00243597	Phototransduction_fly	BmuPB011026;BmuPB019277;BmuPB004701;BmuPB004717;BmuPB016760;BmuPB018163;BmuPB007695;BmuPB016562;BmuPB016218;
		map04211	90	17	6.25439	2.71809	0.000565395	0.00272345	Longevity_regulating_pathway	BmuPB002665;BmuPB000101;BmuPB009556;BmuPB010201;BmuPB002020;BmuPB008543;BmuPB000999;BmuPB001395;BmuPB018888;BmuPB008842;BmuPB011011;BmuPB013701;BmuPB014903;BmuPB008916;BmuPB020942;BmuPB006610;BmuPB014027;
		map04723	152	24	10.563	2.27209	0.000601822	0.00285866	Retrograde_endocannabinoid_signaling	BmuPB018887;BmuPB016661;BmuPB010181;BmuPB018163;BmuPB010201;BmuPB007695;BmuPB019648;BmuPB016562;BmuPB004389;BmuPB019277;BmuPB004701;BmuPB017867;BmuPB011011;BmuPB013701;BmuPB018241;BmuPB011771;BmuPB020197;BmuPB016092;BmuPB015244;BmuPB011704;BmuPB001395;BmuPB017868;BmuPB017660;BmuPB001360;
		map04923	58	13	4.03061	3.22532	0.000619711	0.00289394	Regulation_of_lipolysis_in_adipocytes	BmuPB000999;BmuPB001395;BmuPB016882;BmuPB020959;BmuPB011704;BmuPB010201;BmuPB019648;BmuPB011011;BmuPB002020;BmuPB013701;BmuPB014903;BmuPB006610;BmuPB006214;
		map04973	43	11	2.98821	3.68113	0.000626173	0.00289394	Carbohydrate_digestion_and_absorption	BmuPB008616;BmuPB000999;BmuPB019026;BmuPB003569;BmuPB002020;BmuPB008617;BmuPB014903;BmuPB004389;BmuPB006610;BmuPB013074;BmuPB011771;
		map05225	171	26	11.8833	2.18794	0.000686184	0.003129	Hepatocellular_carcinoma	BmuPB009393;BmuPB000099;BmuPB015314;BmuPB016562;BmuPB002020;BmuPB004389;BmuPB018608;BmuPB004717;BmuPB000999;BmuPB000444;BmuPB016560;BmuPB016119;BmuPB014903;BmuPB006610;BmuPB018234;BmuPB011841;BmuPB011878;BmuPB021569;BmuPB020197;BmuPB016092;BmuPB009556;BmuPB018568;BmuPB011558;BmuPB019623;BmuPB013846;BmuPB020942;
		map04520	75	15	5.21199	2.87798	0.000696808	0.00313563	Adherens_junction	BmuPB016092;BmuPB009393;BmuPB004700;BmuPB009556;BmuPB015314;BmuPB005615;BmuPB002920;BmuPB004717;BmuPB006147;BmuPB019417;BmuPB011973;BmuPB013702;BmuPB005860;BmuPB001047;BmuPB002707;
		map05223	68	14	4.72554	2.96262	0.000808899	0.00359277	Nonsmall_cell_lung_cancer	BmuPB020197;BmuPB016092;BmuPB020598;BmuPB016562;BmuPB002020;BmuPB004389;BmuPB018568;BmuPB017522;BmuPB011558;BmuPB000999;BmuPB000444;BmuPB014903;BmuPB020942;BmuPB006610;
		map05221	70	14	4.86453	2.87798	0.0010329	0.00452887	Acute_myeloid_leukemia	BmuPB016092;BmuPB008002;BmuPB002802;BmuPB015314;BmuPB020598;BmuPB002020;BmuPB018568;BmuPB011558;BmuPB017667;BmuPB000999;BmuPB005298;BmuPB014903;BmuPB020942;BmuPB006610;
		map05132	88	16	6.11541	2.61634	0.00115061	0.00491887	Salmonella_infection	BmuPB016092;BmuPB004700;BmuPB017529;BmuPB004677;BmuPB010207;BmuPB002002;BmuPB004717;BmuPB017073;BmuPB019639;BmuPB001975;BmuPB017867;BmuPB017868;BmuPB006735;BmuPB011136;BmuPB010392;BmuPB007897;
		map04390	158	24	10.9799	2.18581	0.00124196	0.00524385	Hippo_signaling_pathway	BmuPB009393;BmuPB000099;BmuPB003109;BmuPB015314;BmuPB010476;BmuPB004717;BmuPB018515;BmuPB008029;BmuPB016560;BmuPB011841;BmuPB011591;BmuPB011928;BmuPB000603;BmuPB006483;BmuPB000274;BmuPB018568;BmuPB006681;BmuPB019623;BmuPB009870;BmuPB005777;BmuPB013846;BmuPB015571;BmuPB002477;BmuPB012063;
		map04218	179	26	12.4393	2.09015	0.00148456	0.00619172	Cellular_senescence	BmuPB009393;BmuPB016649;BmuPB007695;BmuPB002020;BmuPB017522;BmuPB017743;BmuPB000999;BmuPB017867;BmuPB016760;BmuPB014010;BmuPB022320;BmuPB014903;BmuPB006610;BmuPB016546;BmuPB015581;BmuPB011771;BmuPB016092;BmuPB015244;BmuPB018568;BmuPB001291;BmuPB000471;BmuPB011558;BmuPB021518;BmuPB017868;BmuPB011632;BmuPB020942;
		map04213	65	13	4.51706	2.87798	0.00153477	0.00632399	Longevity_regulating_pathway_multiple_species	BmuPB000101;BmuPB009556;BmuPB010201;BmuPB002020;BmuPB015943;BmuPB000999;BmuPB001395;BmuPB011011;BmuPB013701;BmuPB014903;BmuPB020942;BmuPB006610;BmuPB019523;
		map04915	137	21	9.52058	2.20575	0.00179864	0.00732305	Estrogen_signaling_pathway	BmuPB018163;BmuPB010201;BmuPB007695;BmuPB002020;BmuPB019277;BmuPB000999;BmuPB016760;BmuPB011011;BmuPB013701;BmuPB014903;BmuPB006610;BmuPB014027;BmuPB016092;BmuPB015244;BmuPB011704;BmuPB011266;BmuPB011558;BmuPB001395;BmuPB020942;BmuPB020257;BmuPB001360;
		map05211	75	14	5.21199	2.68611	0.00182938	0.00736057	Renal_cell_carcinoma	BmuPB016092;BmuPB009107;BmuPB004700;BmuPB002020;BmuPB015780;BmuPB011558;BmuPB013702;BmuPB000999;BmuPB014903;BmuPB020942;BmuPB008143;BmuPB006610;BmuPB001028;BmuPB013554;
		map04721	68	13	4.72554	2.75101	0.00217736	0.00855926	Synaptic_vesicle_cycle	BmuPB018887;BmuPB016661;BmuPB016641;BmuPB010181;BmuPB019270;BmuPB019366;BmuPB020967;BmuPB009190;BmuPB016737;BmuPB013749;BmuPB003171;BmuPB009318;BmuPB004489;
		map04530	194	27	13.4817	2.00272	0.00227156	0.00873679	Tight_junction	BmuPB019136;BmuPB008002;BmuPB000101;BmuPB010201;BmuPB004603;BmuPB013259;BmuPB004717;BmuPB017743;BmuPB012091;BmuPB004750;BmuPB016786;BmuPB006525;BmuPB011771;BmuPB013515;BmuPB006483;BmuPB004700;BmuPB018568;BmuPB006681;BmuPB021233;BmuPB015571;BmuPB012092;BmuPB003184;BmuPB012738;BmuPB012063;BmuPB001047;BmuPB018577;BmuPB018385;
		map04350	91	16	6.32389	2.53009	0.00227361	0.00873679	TGFbeta_signaling_pathway	BmuPB016092;BmuPB009393;BmuPB012888;BmuPB008631;BmuPB003515;BmuPB009391;BmuPB001291;BmuPB000471;BmuPB018515;BmuPB014166;BmuPB013702;BmuPB009870;BmuPB005777;BmuPB011226;BmuPB002477;BmuPB000603;
		map04664	78	14	5.42047	2.5828	0.00251446	0.00955495	Fc_epsilon_RI_signaling_pathway	BmuPB016092;BmuPB004700;BmuPB016562;BmuPB002020;BmuPB011558;BmuPB000999;BmuPB000444;BmuPB017867;BmuPB017868;BmuPB014903;BmuPB020942;BmuPB006610;BmuPB016546;BmuPB005699;
		map04150	162	23	11.2579	2.04301	0.00264692	0.00989996	mTOR_signaling_pathway	BmuPB000099;BmuPB016562;BmuPB002020;BmuPB004389;BmuPB012704;BmuPB000460;BmuPB000999;BmuPB014903;BmuPB006610;BmuPB011841;BmuPB001465;BmuPB020197;BmuPB016092;BmuPB002291;BmuPB009556;BmuPB013761;BmuPB011558;BmuPB019623;BmuPB012547;BmuPB014602;BmuPB008916;BmuPB020942;BmuPB013447;
		map05218	79	14	5.48997	2.55011	0.00278497	0.0102415	Melanoma	BmuPB016092;BmuPB009556;BmuPB002020;BmuPB005615;BmuPB006515;BmuPB018568;BmuPB011558;BmuPB000999;BmuPB014903;BmuPB020942;BmuPB006610;BmuPB009719;BmuPB013554;BmuPB004764;
		map05213	62	12	4.30858	2.78514	0.00289508	0.0105332	Endometrial_cancer	BmuPB016092;BmuPB013846;BmuPB000999;BmuPB016560;BmuPB015314;BmuPB002020;BmuPB014903;BmuPB020942;BmuPB006610;BmuPB018568;BmuPB007587;BmuPB011558;
		map00620	46	10	3.19669	3.12824	0.00306849	0.0110466	Pyruvate_metabolism	BmuPB005274;BmuPB002847;BmuPB017099;BmuPB017937;BmuPB010240;BmuPB012998;BmuPB009427;BmuPB013782;BmuPB004581;BmuPB018396;
		map00515	24	7	1.66784	4.19705	0.00324463	0.011559	Mannose_type_Oglycan_biosynthesis	BmuPB016754;BmuPB007151;BmuPB009110;BmuPB019347;BmuPB007645;BmuPB005657;BmuPB005862;
		map04012	88	15	6.11541	2.45282	0.00373126	0.0131556	ErbB_signaling_pathway	BmuPB020197;BmuPB016092;BmuPB014101;BmuPB016562;BmuPB002020;BmuPB004389;BmuPB009120;BmuPB011558;BmuPB011026;BmuPB000999;BmuPB000444;BmuPB014903;BmuPB020942;BmuPB006610;BmuPB001028;
		map04068	136	20	9.45108	2.11616	0.00480604	0.0167721	FoxO_signaling_pathway	BmuPB009393;BmuPB000101;BmuPB002020;BmuPB019928;BmuPB004386;BmuPB000999;BmuPB017867;BmuPB007089;BmuPB014903;BmuPB006610;BmuPB016092;BmuPB009556;BmuPB020598;BmuPB002920;BmuPB018568;BmuPB011558;BmuPB013702;BmuPB017868;BmuPB020942;BmuPB001627;
		map04210	142	20	9.86804	2.02674	0.00589242	0.0199525	Apoptosis	BmuPB007695;BmuPB002020;BmuPB009881;BmuPB009275;BmuPB004717;BmuPB000999;BmuPB007089;BmuPB020957;BmuPB014903;BmuPB006610;BmuPB022114;BmuPB013515;BmuPB016092;BmuPB015244;BmuPB011558;BmuPB014537;BmuPB009160;BmuPB020942;BmuPB020257;BmuPB013447;
		map04668	111	17	7.71375	2.20386	0.00579605	0.0199525	TNF_signaling_pathway	BmuPB016092;BmuPB020228;BmuPB008247;BmuPB002020;BmuPB001987;BmuPB009275;BmuPB014537;BmuPB000999;BmuPB017867;BmuPB017868;BmuPB014903;BmuPB013557;BmuPB006610;BmuPB016546;BmuPB014027;BmuPB013447;BmuPB016075;
		map00061	15	5	1.0424	4.79663	0.0079209	0.0260476	Fatty_acid_biosynthesis	BmuPB017937;BmuPB016031;BmuPB002847;BmuPB011931;BmuPB013622;
		map04960	38	8	2.64074	3.02945	0.00907227	0.0295497	Aldosteroneregulated_sodium_reabsorption	BmuPB020197;BmuPB016092;BmuPB003569;BmuPB016562;BmuPB014903;BmuPB004389;BmuPB006610;BmuPB013074;
		map04330	48	9	3.33568	2.6981	0.0109687	0.0353894	Notch_signaling_pathway	BmuPB013702;BmuPB017998;BmuPB011471;BmuPB004736;BmuPB013241;BmuPB014615;BmuPB018103;BmuPB003530;BmuPB016075;
		map04011	32	7	2.22378	3.14779	0.0120358	0.0381134	MAPK_signaling_pathway_yeast	BmuPB016092;BmuPB017867;BmuPB017868;BmuPB016562;BmuPB018062;BmuPB016081;BmuPB009910;
		map04625	104	15	7.2273	2.07546	0.0136572	0.0428512	Ctype_lectin_receptor_signaling_pathway	BmuPB016092;BmuPB016649;BmuPB015244;BmuPB007695;BmuPB002020;BmuPB011558;BmuPB000999;BmuPB017867;BmuPB016760;BmuPB017868;BmuPB018993;BmuPB014903;BmuPB020942;BmuPB006610;BmuPB015581;
		map05212	76	12	5.28149	2.27209	0.014316	0.0445096	Pancreatic_cancer	BmuPB016092;BmuPB009393;BmuPB004700;BmuPB020598;BmuPB002020;BmuPB018568;BmuPB009092;BmuPB011558;BmuPB000277;BmuPB000999;BmuPB014903;BmuPB006610;
		map04340	51	9	3.54416	2.53939	0.0151411	0.0458252	Hedgehog_signaling_pathway	BmuPB006052;BmuPB010201;BmuPB000274;BmuPB011226;BmuPB018568;BmuPB020257;BmuPB000094;BmuPB011928;BmuPB016218;
		map05014	51	9	3.54416	2.53939	0.0151411	0.0458252	Amyotrophic_lateral_sclerosis_ALS	BmuPB017867;BmuPB004700;BmuPB017868;BmuPB016546;BmuPB012088;BmuPB019523;BmuPB010819;BmuPB020257;BmuPB013447;
		map00051	34	7	2.36277	2.96262	0.0157118	0.0471355	Fructose_and_mannose_metabolism	BmuPB008616;BmuPB008176;BmuPB008043;BmuPB008617;BmuPB013663;BmuPB013587;BmuPB007443;
cerebellum vs brainstem	GO	GO:0005515	4194	849	603.248	1.40738	2.09043e-15	1.32011e-12	molecular_function:protein binding	BmuPB009951;BmuPB016695;BmuPB018163;BmuPB002209;BmuPB002719;BmuPB015945;BmuPB000111;BmuPB019003;BmuPB009568;BmuPB005860;BmuPB016176;BmuPB010623;BmuPB017104;BmuPB019814;BmuPB003111;BmuPB009903;BmuPB003100;BmuPB021461;BmuPB003065;BmuPB011500;BmuPB010398;BmuPB018087;BmuPB018276;BmuPB022458;BmuPB014919;BmuPB015189;BmuPB009731;BmuPB018577;BmuPB006842;BmuPB009609;BmuPB002228;BmuPB016750;BmuPB014937;Bmu…
		GO:0004672	503	147	72.3495	2.0318	3.14339e-12	1.32337e-09	molecular_function:protein kinase activity	BmuPB021480;BmuPB010996;BmuPB010201;BmuPB018351;BmuPB012704;BmuPB009915;BmuPB009120;BmuPB005852;BmuPB017070;BmuPB008076;BmuPB004386;BmuPB018130;BmuPB009568;BmuPB017538;BmuPB000999;BmuPB012454;BmuPB003282;BmuPB010995;BmuPB011517;BmuPB017523;BmuPB015212;BmuPB014010;BmuPB017104;BmuPB016546;BmuPB016976;BmuPB012886;BmuPB000574;BmuPB016631;BmuPB011393;BmuPB009672;BmuPB005657;BmuPB011928;BmuPB010773;Bmu…
		GO:0006468	688	176	98.9591	1.77851	2.88808e-10	9.11911e-08	biological_process:protein phosphorylation	BmuPB001463;BmuPB010201;BmuPB018351;BmuPB012704;BmuPB009915;BmuPB017070;BmuPB008076;BmuPB004386;BmuPB007706;BmuPB009568;BmuPB017538;BmuPB000999;BmuPB003535;BmuPB003282;BmuPB013065;BmuPB010995;BmuPB011517;BmuPB015212;BmuPB005860;BmuPB017104;BmuPB012886;BmuPB000574;BmuPB016631;BmuPB011393;BmuPB009672;BmuPB011928;BmuPB006690;BmuPB015849;BmuPB016882;BmuPB006337;BmuPB006208;BmuPB014101;BmuPB015109;Bmu…
		GO:0004713	415	119	59.6919	1.99357	7.55676e-10	1.90884e-07	molecular_function:protein tyrosine kinase activity	BmuPB010201;BmuPB018351;BmuPB009915;BmuPB009120;BmuPB005852;BmuPB008076;BmuPB004386;BmuPB018130;BmuPB009568;BmuPB017538;BmuPB000999;BmuPB012454;BmuPB011517;BmuPB017523;BmuPB015212;BmuPB014010;BmuPB017104;BmuPB016546;BmuPB016976;BmuPB012886;BmuPB011393;BmuPB009672;BmuPB011928;BmuPB010773;BmuPB006690;BmuPB007131;BmuPB015849;BmuPB006337;BmuPB009556;BmuPB014101;BmuPB011186;BmuPB015109;BmuPB000672;Bmu…
		GO:0007165	669	149	96.2262	1.54843	5.57093e-06	0.000703608	biological_process:signal transduction	BmuPB016695;BmuPB002516;BmuPB018163;BmuPB004725;BmuPB016764;BmuPB005440;BmuPB011068;BmuPB011800;BmuPB001377;BmuPB017014;BmuPB011265;BmuPB014903;BmuPB016394;BmuPB022114;BmuPB016751;BmuPB002940;BmuPB007154;BmuPB012735;BmuPB012687;BmuPB002664;BmuPB007164;BmuPB015780;BmuPB003382;BmuPB006642;BmuPB002389;BmuPB018612;BmuPB020942;BmuPB008638;BmuPB019807;BmuPB006844;BmuPB009157;BmuPB016788;BmuPB018575;Bmu…
		GO:0005524	1643	318	236.322	1.34562	7.0993e-06	0.000815129	molecular_function:ATP binding	BmuPB009099;BmuPB013843;BmuPB001463;BmuPB017511;BmuPB009915;BmuPB006302;BmuPB005353;BmuPB004386;BmuPB008208;BmuPB009568;BmuPB007605;BmuPB000999;BmuPB003535;BmuPB011517;BmuPB013279;BmuPB005860;BmuPB017104;BmuPB000574;BmuPB011393;BmuPB019816;BmuPB009672;BmuPB003038;BmuPB012952;BmuPB013704;BmuPB012656;BmuPB006208;BmuPB004650;BmuPB008918;BmuPB003100;BmuPB000672;BmuPB003088;BmuPB006681;BmuPB008198;Bmu…
		GO:0035556	259	70	37.2535	1.87902	1.2053e-05	0.00126858	biological_process:intracellular signal transduction	BmuPB017685;BmuPB015062;BmuPB018163;BmuPB007900;BmuPB018608;BmuPB017472;BmuPB001425;BmuPB012009;BmuPB016394;BmuPB010950;BmuPB013849;BmuPB009644;BmuPB013786;BmuPB015098;BmuPB015630;BmuPB004403;BmuPB003111;BmuPB008822;BmuPB006681;BmuPB005697;BmuPB003746;BmuPB002658;BmuPB015778;BmuPB003565;BmuPB003164;BmuPB014077;BmuPB016559;BmuPB014151;BmuPB018385;BmuPB017665;BmuPB014892;BmuPB014937;BmuPB016562;Bmu…
		GO:0005543	247	66	35.5275	1.85772	3.43958e-05	0.00289613	molecular_function:phospholipid binding	BmuPB016985;BmuPB019371;BmuPB015227;BmuPB013524;BmuPB004048;BmuPB015249;BmuPB000991;BmuPB006709;BmuPB001642;BmuPB014710;BmuPB002020;BmuPB018075;BmuPB009275;BmuPB010074;BmuPB018846;BmuPB006665;BmuPB012909;BmuPB002078;BmuPB000999;BmuPB000444;BmuPB014386;BmuPB004758;BmuPB019055;BmuPB005348;BmuPB007594;BmuPB006735;BmuPB017713;BmuPB017104;BmuPB020609;BmuPB009644;BmuPB004158;BmuPB007468;BmuPB015324;Bmu…
		GO:0008270	1095	216	157.5	1.37143	6.46662e-05	0.00510459	molecular_function:zinc ion binding	BmuPB009951;BmuPB000697;BmuPB016997;BmuPB001463;BmuPB000575;BmuPB006051;BmuPB012183;BmuPB012489;BmuPB014579;BmuPB021249;BmuPB002486;BmuPB010942;BmuPB013209;BmuPB001061;BmuPB008694;BmuPB004403;BmuPB013031;BmuPB011557;BmuPB011663;BmuPB011413;BmuPB001530;BmuPB011157;BmuPB017088;BmuPB015189;BmuPB015226;BmuPB017949;BmuPB021192;BmuPB017616;BmuPB015186;BmuPB012749;BmuPB006818;BmuPB012451;BmuPB006709;Bmu…
		GO:0004674	211	56	30.3494	1.84518	0.000129971	0.00965606	molecular_function:protein serine/threonine kinase activity	BmuPB011971;BmuPB009157;BmuPB014883;BmuPB017114;BmuPB010201;BmuPB016562;BmuPB002020;BmuPB004389;BmuPB003918;BmuPB012704;BmuPB002968;BmuPB010207;BmuPB002528;BmuPB011767;BmuPB011626;BmuPB007706;BmuPB011447;BmuPB017079;BmuPB000999;BmuPB003535;BmuPB000416;BmuPB013065;BmuPB011517;BmuPB000078;BmuPB017104;BmuPB012886;BmuPB011393;BmuPB009672;BmuPB016218;BmuPB020197;BmuPB009170;BmuPB016882;BmuPB006337;Bmu…
		GO:0003824	354	79	50.9179	1.55152	0.000772876	0.0488071	molecular_function:catalytic activity	BmuPB016950;BmuPB012008;BmuPB009776;BmuPB006839;BmuPB019856;BmuPB003175;BmuPB021981;BmuPB017511;BmuPB010794;BmuPB001622;BmuPB003485;BmuPB016869;BmuPB017615;BmuPB014133;BmuPB000923;BmuPB013757;BmuPB010059;BmuPB017763;BmuPB016031;BmuPB013044;BmuPB007178;BmuPB012952;BmuPB020262;BmuPB017938;BmuPB009112;BmuPB007966;BmuPB000216;BmuPB013203;BmuPB011575;BmuPB019238;BmuPB017937;BmuPB014919;BmuPB011946;Bmu…
	KEGG	map04015	247	76	35.5275	2.13919	7.74777e-08	1.39072e-05	Rap1_signaling_pathway	BmuPB006285;BmuPB015062;BmuPB009609;BmuPB009107;BmuPB012463;BmuPB018163;BmuPB016562;BmuPB002020;BmuPB006515;BmuPB004389;BmuPB011068;BmuPB009092;BmuPB017522;BmuPB011508;BmuPB019277;BmuPB001547;BmuPB012946;BmuPB016992;BmuPB014392;BmuPB004717;BmuPB014694;BmuPB008029;BmuPB000999;BmuPB002722;BmuPB000444;BmuPB003282;BmuPB005289;BmuPB016760;BmuPB019055;BmuPB011011;BmuPB015212;BmuPB013701;BmuPB011397;Bmu…
		map04070	101	41	14.5274	2.82225	3.10668e-07	3.71766e-05	Phosphatidylinositol_signaling_system	BmuPB020197;BmuPB003374;BmuPB015244;BmuPB001895;BmuPB009609;BmuPB002807;BmuPB008537;BmuPB018133;BmuPB018163;BmuPB007695;BmuPB011827;BmuPB015945;BmuPB016562;BmuPB004389;BmuPB005697;BmuPB016081;BmuPB019277;BmuPB000945;BmuPB016992;BmuPB007135;BmuPB009910;BmuPB004450;BmuPB002433;BmuPB000444;BmuPB015242;BmuPB016760;BmuPB007681;BmuPB007594;BmuPB017355;BmuPB016157;BmuPB014903;BmuPB006610;BmuPB007791;Bmu…
		map04725	113	42	16.2535	2.58406	1.22528e-06	7.92563e-05	Cholinergic_synapse	BmuPB018887;BmuPB020197;BmuPB016092;BmuPB003283;BmuPB015244;BmuPB014081;BmuPB009609;BmuPB018599;BmuPB010181;BmuPB011704;BmuPB018163;BmuPB010201;BmuPB007695;BmuPB016951;BmuPB016562;BmuPB002020;BmuPB003187;BmuPB004389;BmuPB006687;BmuPB019277;BmuPB016992;BmuPB012136;BmuPB011026;BmuPB003746;BmuPB009883;BmuPB000999;BmuPB001395;BmuPB013424;BmuPB008540;BmuPB011011;BmuPB013701;BmuPB014903;BmuPB020942;Bmu…
		map04510	205	62	29.4864	2.10267	1.78707e-06	9.16514e-05	Focal_adhesion	BmuPB006790;BmuPB004844;BmuPB009609;BmuPB006837;BmuPB009107;BmuPB001642;BmuPB016562;BmuPB002020;BmuPB006515;BmuPB004389;BmuPB011672;BmuPB001547;BmuPB015378;BmuPB004717;BmuPB014230;BmuPB011185;BmuPB006017;BmuPB000999;BmuPB007687;BmuPB017335;BmuPB012919;BmuPB014903;BmuPB012060;BmuPB017919;BmuPB017467;BmuPB006610;BmuPB010392;BmuPB016786;BmuPB015530;BmuPB009354;BmuPB015371;BmuPB016751;BmuPB006792;Bmu…
		map04912	93	36	13.3767	2.69124	3.25002e-06	0.000145845	GnRH_signaling_pathway	BmuPB016092;BmuPB015849;BmuPB015244;BmuPB016680;BmuPB018163;BmuPB010201;BmuPB007695;BmuPB016562;BmuPB003212;BmuPB004389;BmuPB019277;BmuPB016992;BmuPB011767;BmuPB011558;BmuPB003746;BmuPB011026;BmuPB006017;BmuPB001395;BmuPB000465;BmuPB003282;BmuPB006393;BmuPB016760;BmuPB009924;BmuPB011011;BmuPB017868;BmuPB015212;BmuPB013701;BmuPB020942;BmuPB016546;BmuPB003245;BmuPB014077;BmuPB004158;BmuPB009894;Bmu…
		map04925	95	36	13.6644	2.63458	4.43581e-06	0.000162544	Aldosterone_synthesis_and_secretion	BmuPB011581;BmuPB020197;BmuPB015244;BmuPB010065;BmuPB016882;BmuPB018163;BmuPB010201;BmuPB007695;BmuPB016562;BmuPB004389;BmuPB019277;BmuPB004701;BmuPB005608;BmuPB016992;BmuPB003746;BmuPB011026;BmuPB001395;BmuPB003569;BmuPB021180;BmuPB014097;BmuPB016760;BmuPB015778;BmuPB011011;BmuPB013701;BmuPB010770;BmuPB021177;BmuPB014077;BmuPB003297;BmuPB009894;BmuPB013074;BmuPB016911;BmuPB000369;BmuPB010609;Bmu…
		map04931	104	38	14.9589	2.54029	5.45972e-06	0.000178185	Insulin_resistance	BmuPB005832;BmuPB018606;BmuPB009609;BmuPB017114;BmuPB004564;BmuPB020598;BmuPB002020;BmuPB016626;BmuPB004389;BmuPB012704;BmuPB006681;BmuPB021535;BmuPB011767;BmuPB008555;BmuPB017900;BmuPB011266;BmuPB008856;BmuPB012547;BmuPB000999;BmuPB003266;BmuPB017007;BmuPB014692;BmuPB012009;BmuPB017937;BmuPB015778;BmuPB016445;BmuPB014919;BmuPB005860;BmuPB018561;BmuPB016682;BmuPB014903;BmuPB000800;BmuPB006610;Bmu…
		map04371	152	48	21.8631	2.19548	9.19469e-06	0.000235778	Apelin_signaling_pathway	BmuPB009393;BmuPB017114;BmuPB018163;BmuPB010201;BmuPB007695;BmuPB011617;BmuPB002020;BmuPB006687;BmuPB019277;BmuPB018367;BmuPB014868;BmuPB016992;BmuPB015378;BmuPB012136;BmuPB005643;BmuPB011800;BmuPB009883;BmuPB000999;BmuPB007977;BmuPB012560;BmuPB006393;BmuPB016760;BmuPB011011;BmuPB013701;BmuPB014409;BmuPB002919;BmuPB006849;BmuPB003831;BmuPB015098;BmuPB016092;BmuPB015244;BmuPB016882;BmuPB011704;Bmu…
		map04360	175	53	25.1713	2.10557	8.72011e-06	0.000235778	Axon_guidance	BmuPB011705;BmuPB009609;BmuPB016562;BmuPB009120;BmuPB014694;BmuPB008125;BmuPB014058;BmuPB017866;BmuPB017106;BmuPB013751;BmuPB003189;BmuPB000444;BmuPB015458;BmuPB003769;BmuPB014903;BmuPB006610;BmuPB015530;BmuPB010610;BmuPB001028;BmuPB016154;BmuPB018165;BmuPB016092;BmuPB007126;BmuPB007488;BmuPB019048;BmuPB004700;BmuPB011704;BmuPB014101;BmuPB011186;BmuPB009693;BmuPB006681;BmuPB010680;BmuPB011558;Bmu…
		map04540	91	34	13.0891	2.59759	1.01998e-05	0.000244114	Gap_junction	BmuPB020197;BmuPB016092;BmuPB015244;BmuPB011704;BmuPB018163;BmuPB010201;BmuPB007695;BmuPB016562;BmuPB006515;BmuPB004389;BmuPB019277;BmuPB016992;BmuPB018906;BmuPB011558;BmuPB003746;BmuPB001395;BmuPB000465;BmuPB005289;BmuPB009987;BmuPB009924;BmuPB011011;BmuPB000624;BmuPB013701;BmuPB000086;BmuPB020942;BmuPB017467;BmuPB003245;BmuPB014077;BmuPB009894;BmuPB011928;BmuPB015098;BmuPB013554;BmuPB004764;Bmu…
		map04926	126	42	18.1233	2.31745	1.15129e-05	0.00025071	Relaxin_signaling_pathway	BmuPB016092;BmuPB009393;BmuPB009609;BmuPB011704;BmuPB018163;BmuPB010201;BmuPB016562;BmuPB002020;BmuPB003212;BmuPB006687;BmuPB006681;BmuPB019277;BmuPB016992;BmuPB012136;BmuPB011266;BmuPB007908;BmuPB011558;BmuPB003746;BmuPB009883;BmuPB006017;BmuPB000999;BmuPB001395;BmuPB013424;BmuPB000465;BmuPB018058;BmuPB009895;BmuPB011011;BmuPB009924;BmuPB017868;BmuPB015212;BmuPB013701;BmuPB012919;BmuPB014903;Bmu…
		map04971	71	29	10.2124	2.8397	1.21284e-05	0.00025071	Gastric_acid_secretion	BmuPB020197;BmuPB015244;BmuPB018599;BmuPB011704;BmuPB018163;BmuPB010201;BmuPB007695;BmuPB016562;BmuPB004389;BmuPB020044;BmuPB019277;BmuPB014555;BmuPB016992;BmuPB015378;BmuPB003746;BmuPB011026;BmuPB001395;BmuPB003569;BmuPB012560;BmuPB016760;BmuPB011011;BmuPB013701;BmuPB012738;BmuPB014077;BmuPB013074;BmuPB011271;BmuPB000556;BmuPB003831;BmuPB015098;
		map00562	72	29	10.3562	2.80026	1.4491e-05	0.000273804	Inositol_phosphate_metabolism	BmuPB003374;BmuPB001895;BmuPB002807;BmuPB009178;BmuPB018133;BmuPB018163;BmuPB014890;BmuPB011827;BmuPB015945;BmuPB016081;BmuPB019277;BmuPB000945;BmuPB016992;BmuPB007135;BmuPB009910;BmuPB004450;BmuPB002433;BmuPB000444;BmuPB007681;BmuPB007594;BmuPB017355;BmuPB016157;BmuPB017861;BmuPB006610;BmuPB007791;BmuPB018989;BmuPB016182;BmuPB005699;BmuPB000986;
		map04911	82	31	11.7945	2.62833	2.2667e-05	0.000387497	Insulin_secretion	BmuPB020197;BmuPB015244;BmuPB005832;BmuPB018606;BmuPB018163;BmuPB010201;BmuPB019270;BmuPB016562;BmuPB016833;BmuPB004389;BmuPB019277;BmuPB016992;BmuPB005412;BmuPB008691;BmuPB003746;BmuPB011026;BmuPB001395;BmuPB018866;BmuPB004560;BmuPB003569;BmuPB005413;BmuPB011011;BmuPB013701;BmuPB016394;BmuPB021177;BmuPB003171;BmuPB014077;BmuPB009894;BmuPB013074;BmuPB011771;BmuPB015098;
		map04724	121	40	17.4041	2.2983	2.22688e-05	0.000387497	Glutamatergic_synapse	BmuPB020197;BmuPB016092;BmuPB005385;BmuPB016661;BmuPB015244;BmuPB010181;BmuPB011704;BmuPB018163;BmuPB003109;BmuPB017847;BmuPB010201;BmuPB007695;BmuPB005747;BmuPB016562;BmuPB004389;BmuPB006687;BmuPB011703;BmuPB019277;BmuPB016992;BmuPB012136;BmuPB016869;BmuPB003746;BmuPB009883;BmuPB017472;BmuPB001395;BmuPB013424;BmuPB002405;BmuPB011011;BmuPB013701;BmuPB014409;BmuPB001627;BmuPB017104;BmuPB011727;Bmu…
		map04750	103	36	14.8151	2.42995	2.73331e-05	0.000446027	Inflammatory_mediator_regulation_of_TRP_channels	BmuPB020197;BmuPB015244;BmuPB009609;BmuPB017945;BmuPB018163;BmuPB003100;BmuPB010201;BmuPB007695;BmuPB016562;BmuPB004389;BmuPB010801;BmuPB019277;BmuPB016992;BmuPB007164;BmuPB011767;BmuPB004895;BmuPB003746;BmuPB011026;BmuPB011269;BmuPB001395;BmuPB000465;BmuPB000444;BmuPB003282;BmuPB016760;BmuPB015778;BmuPB011011;BmuPB017868;BmuPB015212;BmuPB013701;BmuPB014903;BmuPB006610;BmuPB016546;BmuPB003989;Bmu…
		map04611	118	39	16.9726	2.29782	2.96191e-05	0.000462315	Platelet_activation	BmuPB016985;BmuPB016092;BmuPB006996;BmuPB015244;BmuPB009609;BmuPB009908;BmuPB011704;BmuPB018163;BmuPB010201;BmuPB007695;BmuPB002020;BmuPB003187;BmuPB006681;BmuPB019277;BmuPB016992;BmuPB015378;BmuPB004717;BmuPB011266;BmuPB007908;BmuPB016759;BmuPB003746;BmuPB000999;BmuPB001395;BmuPB000465;BmuPB019055;BmuPB011011;BmuPB017868;BmuPB015212;BmuPB013701;BmuPB014903;BmuPB006610;BmuPB016786;BmuPB016326;Bmu…
		map04916	98	34	14.0959	2.41204	3.58041e-05	0.000501129	Melanogenesis	BmuPB020197;BmuPB016092;BmuPB003111;BmuPB008906;BmuPB011704;BmuPB000099;BmuPB018163;BmuPB010201;BmuPB015314;BmuPB016562;BmuPB004389;BmuPB006704;BmuPB019277;BmuPB016992;BmuPB011558;BmuPB019623;BmuPB003746;BmuPB011026;BmuPB013702;BmuPB000100;BmuPB001395;BmuPB006351;BmuPB011778;BmuPB016760;BmuPB009924;BmuPB011011;BmuPB013701;BmuPB020942;BmuPB011841;BmuPB014077;BmuPB001360;BmuPB003831;BmuPB015098;Bmu…
		map05230	59	25	8.48632	2.94592	3.76893e-05	0.000501129	Central_carbon_metabolism_in_cancer	BmuPB016092;BmuPB018283;BmuPB008616;BmuPB000999;BmuPB005832;BmuPB009609;BmuPB013402;BmuPB009924;BmuPB008043;BmuPB002020;BmuPB005615;BmuPB008617;BmuPB006515;BmuPB014903;BmuPB020942;BmuPB015070;BmuPB006610;BmuPB009427;BmuPB011929;BmuPB011508;BmuPB015530;BmuPB009528;BmuPB003396;BmuPB001465;BmuPB011558;
		map04261	152	46	21.8631	2.10401	3.60561e-05	0.000501129	Adrenergic_signaling_in_cardiomyocytes	BmuPB015062;BmuPB018599;BmuPB018163;BmuPB010201;BmuPB011617;BmuPB016562;BmuPB002020;BmuPB000742;BmuPB019277;BmuPB001973;BmuPB016992;BmuPB015852;BmuPB007605;BmuPB000999;BmuPB011777;BmuPB012560;BmuPB003569;BmuPB017014;BmuPB016760;BmuPB011011;BmuPB001140;BmuPB015212;BmuPB013701;BmuPB016394;BmuPB021177;BmuPB011771;BmuPB003831;BmuPB015098;BmuPB016563;BmuPB011581;BmuPB006483;BmuPB016092;BmuPB011704;Bmu…
		map04928	102	35	14.6713	2.38562	4.31501e-05	0.000534169	Parathyroid_hormone_synthesis_secretion_and_action	BmuPB020197;BmuPB016092;BmuPB004731;BmuPB016284;BmuPB015244;BmuPB017312;BmuPB011704;BmuPB018163;BmuPB010201;BmuPB007695;BmuPB016562;BmuPB005615;BmuPB011618;BmuPB004389;BmuPB009561;BmuPB019277;BmuPB018367;BmuPB016992;BmuPB011558;BmuPB003746;BmuPB001395;BmuPB001331;BmuPB006393;BmuPB011011;BmuPB013701;BmuPB003096;BmuPB021177;BmuPB015395;BmuPB014077;BmuPB020257;BmuPB004158;BmuPB009894;BmuPB000369;Bmu…
		map04713	102	35	14.6713	2.38562	4.31501e-05	0.000534169	Circadian_entrainment	BmuPB020197;BmuPB016092;BmuPB015244;BmuPB011704;BmuPB018163;BmuPB010201;BmuPB007695;BmuPB020228;BmuPB016562;BmuPB004389;BmuPB006687;BmuPB003170;BmuPB019277;BmuPB016992;BmuPB012136;BmuPB003746;BmuPB011026;BmuPB009883;BmuPB017667;BmuPB017472;BmuPB001395;BmuPB013424;BmuPB018866;BmuPB016760;BmuPB011011;BmuPB013701;BmuPB014409;BmuPB013076;BmuPB012088;BmuPB014077;BmuPB003297;BmuPB001360;BmuPB011771;Bmu…
		map04670	117	38	16.8288	2.25803	4.74877e-05	0.000537681	Leukocyte_transendothelial_migration	BmuPB020197;BmuPB004163;BmuPB004844;BmuPB009995;BmuPB015849;BmuPB015062;BmuPB009609;BmuPB005825;BmuPB004700;BmuPB011704;BmuPB014101;BmuPB016562;BmuPB003116;BmuPB004389;BmuPB017522;BmuPB001547;BmuPB004717;BmuPB019417;BmuPB008029;BmuPB011888;BmuPB000444;BmuPB013907;BmuPB015657;BmuPB017868;BmuPB015212;BmuPB014903;BmuPB016394;BmuPB012738;BmuPB006610;BmuPB016786;BmuPB016326;BmuPB013947;BmuPB001047;Bmu…
		map04933	103	35	14.8151	2.36246	4.71064e-05	0.000537681	AGERAGE_signaling_pathway_in_diabetic_complications	BmuPB016092;BmuPB009393;BmuPB009609;BmuPB020597;BmuPB004700;BmuPB018163;BmuPB020598;BmuPB011827;BmuPB016562;BmuPB002020;BmuPB004389;BmuPB018568;BmuPB006681;BmuPB019277;BmuPB020596;BmuPB016992;BmuPB011767;BmuPB011266;BmuPB007908;BmuPB006017;BmuPB000999;BmuPB000444;BmuPB000818;BmuPB018058;BmuPB006393;BmuPB015778;BmuPB007594;BmuPB017868;BmuPB015212;BmuPB012919;BmuPB014903;BmuPB020942;BmuPB006610;Bmu…
		map04921	158	47	22.7261	2.06811	4.7927e-05	0.000537681	Oxytocin_signaling_pathway	BmuPB003283;BmuPB018163;BmuPB010201;BmuPB007695;BmuPB016562;BmuPB004389;BmuPB019277;BmuPB016992;BmuPB015378;BmuPB004717;BmuPB006017;BmuPB011777;BmuPB016760;BmuPB011011;BmuPB013701;BmuPB015581;BmuPB011771;BmuPB003831;BmuPB015098;BmuPB016563;BmuPB020197;BmuPB016092;BmuPB015244;BmuPB011704;BmuPB003187;BmuPB018568;BmuPB011266;BmuPB016565;BmuPB011558;BmuPB003746;BmuPB011026;BmuPB003382;BmuPB004368;Bmu…
		map04022	169	49	24.3083	2.01578	5.38491e-05	0.000585813	cGMPPKG_signaling_pathway	BmuPB004731;BmuPB005647;BmuPB018163;BmuPB007695;BmuPB002020;BmuPB021981;BmuPB003044;BmuPB000742;BmuPB019277;BmuPB018367;BmuPB014868;BmuPB016992;BmuPB015378;BmuPB015852;BmuPB017743;BmuPB000999;BmuPB003569;BmuPB005605;BmuPB016760;BmuPB011011;BmuPB013701;BmuPB021177;BmuPB016786;BmuPB015581;BmuPB011771;BmuPB003831;BmuPB015098;BmuPB011581;BmuPB016092;BmuPB015244;BmuPB018606;BmuPB011704;BmuPB003187;Bmu…
		map04919	114	37	16.3973	2.25647	6.29063e-05	0.000664216	Thyroid_hormone_signaling_pathway	BmuPB020197;BmuPB016092;BmuPB005832;BmuPB009609;BmuPB018163;BmuPB010201;BmuPB011827;BmuPB016562;BmuPB002020;BmuPB003232;BmuPB017511;BmuPB004389;BmuPB018568;BmuPB019277;BmuPB016992;BmuPB004717;BmuPB009106;BmuPB011558;BmuPB017743;BmuPB013702;BmuPB000999;BmuPB000465;BmuPB000444;BmuPB019186;BmuPB012560;BmuPB003569;BmuPB004258;BmuPB016445;BmuPB007594;BmuPB009924;BmuPB017335;BmuPB014903;BmuPB020942;Bmu…
		map04930	48	21	6.90412	3.04166	7.77062e-05	0.000797044	Type_II_diabetes_mellitus	BmuPB018887;BmuPB016092;BmuPB008616;BmuPB006825;BmuPB018606;BmuPB009609;BmuPB012009;BmuPB010181;BmuPB005413;BmuPB015778;BmuPB008617;BmuPB014903;BmuPB006610;BmuPB009427;BmuPB006681;BmuPB005644;BmuPB003297;BmuPB011767;BmuPB018396;BmuPB005412;BmuPB011771;
		map05206	143	43	20.5685	2.09057	8.35345e-05	0.000833025	MicroRNAs_in_cancer	BmuPB006790;BmuPB002687;BmuPB004324;BmuPB016562;BmuPB006515;BmuPB004389;BmuPB009120;BmuPB000444;BmuPB007089;BmuPB011841;BmuPB015530;BmuPB013804;BmuPB006792;BmuPB013554;BmuPB001028;BmuPB020197;BmuPB003742;BmuPB001930;BmuPB020598;BmuPB020228;BmuPB011227;BmuPB018568;BmuPB011975;BmuPB003396;BmuPB017549;BmuPB011558;BmuPB013702;BmuPB018283;BmuPB017454;BmuPB015247;BmuPB010097;BmuPB015778;BmuPB009924;Bmu…
		map04934	162	47	23.3014	2.01704	8.93705e-05	0.000867135	Cushing_s_syndrome	BmuPB010065;BmuPB000099;BmuPB018163;BmuPB010201;BmuPB007695;BmuPB015314;BmuPB001622;BmuPB019277;BmuPB005608;BmuPB016992;BmuPB021180;BmuPB016560;BmuPB011011;BmuPB013701;BmuPB010770;BmuPB011841;BmuPB021177;BmuPB017010;BmuPB003297;BmuPB018871;BmuPB011771;BmuPB015098;BmuPB021263;BmuPB016092;BmuPB003111;BmuPB015244;BmuPB008906;BmuPB011845;BmuPB011704;BmuPB018849;BmuPB003065;BmuPB018568;BmuPB006704;Bmu…
		map04910	146	43	21	2.04761	0.000103116	0.000974172	Insulin_signaling_pathway	BmuPB002847;BmuPB009609;BmuPB017114;BmuPB009107;BmuPB010201;BmuPB015945;BmuPB002020;BmuPB008617;BmuPB009993;BmuPB006147;BmuPB011661;BmuPB011931;BmuPB000999;BmuPB017007;BmuPB012009;BmuPB016760;BmuPB005860;BmuPB016682;BmuPB014903;BmuPB000800;BmuPB006610;BmuPB005565;BmuPB003831;BmuPB004120;BmuPB016092;BmuPB004762;BmuPB018606;BmuPB016882;BmuPB004477;BmuPB006681;BmuPB011975;BmuPB018396;BmuPB011558;Bmu…
		map04666	96	32	13.8082	2.31745	0.000136574	0.00120071	Fc_gamma_Rmediated_phagocytosis	BmuPB020197;BmuPB016092;BmuPB014075;BmuPB009995;BmuPB009609;BmuPB017360;BmuPB017114;BmuPB004700;BmuPB015945;BmuPB016562;BmuPB002020;BmuPB004389;BmuPB004677;BmuPB011767;BmuPB011558;BmuPB009910;BmuPB004413;BmuPB000999;BmuPB012187;BmuPB000444;BmuPB015778;BmuPB014542;BmuPB010630;BmuPB014903;BmuPB006610;BmuPB016786;BmuPB004158;BmuPB005699;BmuPB004543;BmuPB010970;BmuPB002707;BmuPB016154;
		map05221	70	26	10.0685	2.58231	0.000140473	0.00120071	Acute_myeloid_leukemia	BmuPB016092;BmuPB009609;BmuPB020597;BmuPB017114;BmuPB002802;BmuPB015314;BmuPB020598;BmuPB002020;BmuPB018568;BmuPB003170;BmuPB020596;BmuPB011558;BmuPB017667;BmuPB000999;BmuPB008558;BmuPB006351;BmuPB003412;BmuPB005298;BmuPB001754;BmuPB009924;BmuPB014903;BmuPB020942;BmuPB006610;BmuPB005644;BmuPB015226;BmuPB021263;
		map04140	147	43	21.1439	2.03369	0.000158937	0.00129678	Autophagy_animal	BmuPB009609;BmuPB002807;BmuPB017114;BmuPB010201;BmuPB007695;BmuPB002020;BmuPB004813;BmuPB019928;BmuPB017618;BmuPB004722;BmuPB011767;BmuPB008543;BmuPB019639;BmuPB009919;BmuPB015675;BmuPB000999;BmuPB007977;BmuPB007681;BmuPB014903;BmuPB006610;BmuPB015939;BmuPB016092;BmuPB016553;BmuPB018606;BmuPB002291;BmuPB018616;BmuPB009556;BmuPB017529;BmuPB011975;BmuPB013761;BmuPB011558;BmuPB011575;BmuPB014602;Bmu…
		map04071	122	37	17.548	2.10851	0.000180386	0.00143908	Sphingolipid_signaling_pathway	BmuPB020197;BmuPB016092;BmuPB006483;BmuPB014876;BmuPB004731;BmuPB009609;BmuPB018616;BmuPB004700;BmuPB011704;BmuPB004324;BmuPB018163;BmuPB010082;BmuPB016562;BmuPB002020;BmuPB004389;BmuPB006681;BmuPB019277;BmuPB001973;BmuPB016992;BmuPB011266;BmuPB011558;BmuPB001956;BmuPB000999;BmuPB017014;BmuPB015778;BmuPB009924;BmuPB020048;BmuPB017868;BmuPB015212;BmuPB014903;BmuPB020942;BmuPB006610;BmuPB001294;Bmu…
		map05032	94	31	13.5206	2.2928	0.00020011	0.00156173	Morphine_addiction	BmuPB018887;BmuPB020197;BmuPB009576;BmuPB010181;BmuPB011704;BmuPB010201;BmuPB016562;BmuPB004389;BmuPB006687;BmuPB001622;BmuPB017761;BmuPB012136;BmuPB003746;BmuPB009883;BmuPB019238;BmuPB001395;BmuPB013424;BmuPB011517;BmuPB006682;BmuPB011011;BmuPB013701;BmuPB014409;BmuPB017104;BmuPB003096;BmuPB013076;BmuPB014077;BmuPB001360;BmuPB011393;BmuPB015098;BmuPB016218;BmuPB010084;
		map04720	64	24	9.2055	2.60714	0.000264137	0.00197553	Longterm_potentiation	BmuPB020197;BmuPB016092;BmuPB015244;BmuPB015062;BmuPB018163;BmuPB010201;BmuPB007695;BmuPB016562;BmuPB004389;BmuPB012704;BmuPB019277;BmuPB016992;BmuPB011558;BmuPB011026;BmuPB012547;BmuPB013702;BmuPB016760;BmuPB009924;BmuPB011011;BmuPB020942;BmuPB012088;BmuPB016326;BmuPB014077;BmuPB003831;
		map04722	120	36	17.2603	2.08571	0.000372028	0.00261878	Neurotrophin_signaling_pathway	BmuPB013454;BmuPB016092;BmuPB012175;BmuPB008822;BmuPB009609;BmuPB009107;BmuPB004700;BmuPB020228;BmuPB002020;BmuPB013276;BmuPB012704;BmuPB009915;BmuPB009120;BmuPB011767;BmuPB011558;BmuPB012547;BmuPB011026;BmuPB006017;BmuPB000999;BmuPB000444;BmuPB004419;BmuPB016760;BmuPB009924;BmuPB017868;BmuPB015212;BmuPB014903;BmuPB020942;BmuPB006610;BmuPB003245;BmuPB003989;BmuPB016326;BmuPB020257;BmuPB011949;Bmu…
		map00515	24	13	3.45206	3.76586	0.000370913	0.00261878	Mannose_type_Oglycan_biosynthesis	BmuPB016754;BmuPB014308;BmuPB013037;BmuPB007151;BmuPB010939;BmuPB009110;BmuPB014408;BmuPB019347;BmuPB008534;BmuPB007645;BmuPB005657;BmuPB005862;BmuPB019711;
		map04520	75	26	10.7877	2.41015	0.000400843	0.00276736	Adherens_junction	BmuPB016092;BmuPB009393;BmuPB004844;BmuPB004700;BmuPB009556;BmuPB015314;BmuPB005615;BmuPB014688;BmuPB004717;BmuPB003396;BmuPB006147;BmuPB019417;BmuPB011973;BmuPB013702;BmuPB012187;BmuPB000465;BmuPB006351;BmuPB014692;BmuPB013045;BmuPB018058;BmuPB005860;BmuPB015530;BmuPB001047;BmuPB005376;BmuPB002707;BmuPB021263;
		map04721	68	24	9.78084	2.45378	0.000409701	0.00277514	Synaptic_vesicle_cycle	BmuPB018887;BmuPB009170;BmuPB016661;BmuPB001279;BmuPB016641;BmuPB010181;BmuPB019270;BmuPB010074;BmuPB019366;BmuPB016752;BmuPB020967;BmuPB009190;BmuPB006558;BmuPB016049;BmuPB020601;BmuPB004560;BmuPB020415;BmuPB001736;BmuPB016737;BmuPB013749;BmuPB003171;BmuPB009318;BmuPB004489;BmuPB018551;
		map01521	88	28	12.6576	2.21212	0.000624361	0.00379908	EGFR_tyrosine_kinase_inhibitor_resistance	BmuPB020197;BmuPB016092;BmuPB012175;BmuPB009609;BmuPB017114;BmuPB009556;BmuPB020598;BmuPB016562;BmuPB002020;BmuPB006515;BmuPB004389;BmuPB011508;BmuPB003396;BmuPB011558;BmuPB018283;BmuPB000999;BmuPB000465;BmuPB000444;BmuPB007089;BmuPB009924;BmuPB014903;BmuPB020942;BmuPB017467;BmuPB006610;BmuPB015530;BmuPB020257;BmuPB013554;BmuPB004764;
		map04211	90	28	12.9452	2.16296	0.000758479	0.00439184	Longevity_regulating_pathway	BmuPB012175;BmuPB018606;BmuPB009609;BmuPB017114;BmuPB009556;BmuPB013500;BmuPB010201;BmuPB002020;BmuPB011975;BmuPB010648;BmuPB012732;BmuPB008543;BmuPB003746;BmuPB015675;BmuPB000999;BmuPB001395;BmuPB018888;BmuPB008842;BmuPB011011;BmuPB013701;BmuPB014903;BmuPB008916;BmuPB020942;BmuPB006610;BmuPB021177;BmuPB014077;BmuPB015098;BmuPB021192;
		map04961	45	18	6.47262	2.78095	0.000778251	0.0044348	Endocrine_and_other_factorregulated_calcium_reabsorption	BmuPB006558;BmuPB020197;BmuPB009170;BmuPB003569;BmuPB016641;BmuPB018163;BmuPB010201;BmuPB016562;BmuPB013701;BmuPB011618;BmuPB004389;BmuPB019277;BmuPB010074;BmuPB016992;BmuPB013074;BmuPB016752;BmuPB020967;BmuPB015098;
		map04970	100	30	14.3836	2.08571	0.000838807	0.00470518	Salivary_secretion	BmuPB011581;BmuPB020197;BmuPB015244;BmuPB011169;BmuPB018163;BmuPB010201;BmuPB007695;BmuPB016562;BmuPB016833;BmuPB004389;BmuPB000742;BmuPB019277;BmuPB016992;BmuPB015852;BmuPB008691;BmuPB003746;BmuPB001395;BmuPB003569;BmuPB012560;BmuPB005605;BmuPB016760;BmuPB011011;BmuPB014719;BmuPB013701;BmuPB003171;BmuPB014077;BmuPB013074;BmuPB011271;BmuPB003831;BmuPB015098;
		map04914	94	29	13.5206	2.14488	0.000887239	0.00490029	Progesteronemediated_oocyte_maturation	BmuPB016092;BmuPB004743;BmuPB018606;BmuPB009609;BmuPB009903;BmuPB009556;BmuPB011704;BmuPB010201;BmuPB002020;BmuPB012704;BmuPB004386;BmuPB011558;BmuPB003746;BmuPB012547;BmuPB000999;BmuPB001395;BmuPB008843;BmuPB011011;BmuPB017868;BmuPB015212;BmuPB004455;BmuPB011632;BmuPB013701;BmuPB014903;BmuPB006610;BmuPB014077;BmuPB012879;BmuPB009672;BmuPB015098;
		map01522	95	29	13.6644	2.1223	0.00094447	0.00513734	Endocrine_resistance	BmuPB016092;BmuPB009609;BmuPB017114;BmuPB009556;BmuPB018143;BmuPB014101;BmuPB010201;BmuPB002020;BmuPB003232;BmuPB018568;BmuPB003396;BmuPB011558;BmuPB003746;BmuPB006017;BmuPB000999;BmuPB001395;BmuPB000465;BmuPB009924;BmuPB011011;BmuPB017868;BmuPB015212;BmuPB013701;BmuPB014903;BmuPB020942;BmuPB006610;BmuPB014077;BmuPB020257;BmuPB016075;BmuPB015098;
		map04012	88	27	12.6576	2.13311	0.00110387	0.00591475	ErbB_signaling_pathway	BmuPB018165;BmuPB020197;BmuPB016092;BmuPB009609;BmuPB020597;BmuPB017114;BmuPB014101;BmuPB016562;BmuPB002020;BmuPB003212;BmuPB004389;BmuPB009120;BmuPB020596;BmuPB003396;BmuPB011558;BmuPB011026;BmuPB006017;BmuPB000999;BmuPB000465;BmuPB000444;BmuPB009924;BmuPB014903;BmuPB020942;BmuPB006610;BmuPB008717;BmuPB001028;BmuPB006806;
		map04745	28	13	4.02741	3.22788	0.00112726	0.00595126	Phototransduction_fly	BmuPB011026;BmuPB017104;BmuPB019277;BmuPB004701;BmuPB016992;BmuPB004717;BmuPB016760;BmuPB018163;BmuPB016911;BmuPB007695;BmuPB003831;BmuPB016562;BmuPB016218;
		map05223	68	22	9.78084	2.2493	0.00205021	0.0099395	Nonsmall_cell_lung_cancer	BmuPB020197;BmuPB016092;BmuPB012175;BmuPB009609;BmuPB020597;BmuPB020598;BmuPB016562;BmuPB002020;BmuPB004389;BmuPB018568;BmuPB017522;BmuPB020596;BmuPB003396;BmuPB011558;BmuPB000999;BmuPB000444;BmuPB015247;BmuPB000416;BmuPB009924;BmuPB014903;BmuPB020942;BmuPB006610;
		map04927	69	22	9.92468	2.2167	0.00224635	0.010339	Cortisol_synthesis_and_secretion	BmuPB015244;BmuPB010065;BmuPB018163;BmuPB010201;BmuPB007695;BmuPB001622;BmuPB019277;BmuPB005608;BmuPB016992;BmuPB013003;BmuPB003746;BmuPB001395;BmuPB021180;BmuPB011011;BmuPB013701;BmuPB010770;BmuPB021177;BmuPB014077;BmuPB003297;BmuPB009894;BmuPB011771;BmuPB015098;
		map04370	56	19	8.05481	2.35884	0.00247482	0.0112463	VEGF_signaling_pathway	BmuPB020197;BmuPB016092;BmuPB000999;BmuPB000444;BmuPB000465;BmuPB009609;BmuPB004700;BmuPB014101;BmuPB009924;BmuPB017868;BmuPB015212;BmuPB016562;BmuPB002020;BmuPB014903;BmuPB020942;BmuPB004389;BmuPB006610;BmuPB011266;BmuPB011558;
		map05215	97	28	13.9521	2.00687	0.00257998	0.0115777	Prostate_cancer	BmuPB016092;BmuPB008080;BmuPB018606;BmuPB009609;BmuPB009556;BmuPB018351;BmuPB015314;BmuPB002020;BmuPB005615;BmuPB006515;BmuPB018568;BmuPB011508;BmuPB003396;BmuPB011558;BmuPB005643;BmuPB013702;BmuPB000999;BmuPB006351;BmuPB009924;BmuPB014903;BmuPB020942;BmuPB017467;BmuPB006610;BmuPB020257;BmuPB005644;BmuPB013554;BmuPB021263;BmuPB004764;
		map05214	71	22	10.2124	2.15425	0.002762	0.0122415	Glioma	BmuPB020197;BmuPB016092;BmuPB009609;BmuPB009556;BmuPB016562;BmuPB002020;BmuPB006515;BmuPB004389;BmuPB018568;BmuPB011558;BmuPB011026;BmuPB000999;BmuPB000444;BmuPB015247;BmuPB016760;BmuPB009924;BmuPB014903;BmuPB020942;BmuPB006610;BmuPB003831;BmuPB013554;BmuPB004764;
		map04340	51	18	7.33563	2.45378	0.00281193	0.0123108	Hedgehog_signaling_pathway	BmuPB007448;BmuPB006337;BmuPB015458;BmuPB006052;BmuPB010201;BmuPB000274;BmuPB011226;BmuPB018568;BmuPB000051;BmuPB017104;BmuPB013539;BmuPB003096;BmuPB020257;BmuPB000094;BmuPB013925;BmuPB011928;BmuPB011447;BmuPB016218;
		map04917	81	24	11.6507	2.05996	0.00303956	0.013147	Prolactin_signaling_pathway	BmuPB016092;BmuPB018605;BmuPB012175;BmuPB018606;BmuPB016680;BmuPB009609;BmuPB020597;BmuPB009858;BmuPB020598;BmuPB002020;BmuPB018568;BmuPB020596;BmuPB011558;BmuPB003367;BmuPB000999;BmuPB000465;BmuPB012009;BmuPB009924;BmuPB017868;BmuPB015212;BmuPB014903;BmuPB020942;BmuPB011720;BmuPB006610;
		map04213	65	20	9.34933	2.13919	0.00483696	0.0195443	Longevity_regulating_pathway_multiple_species	BmuPB012175;BmuPB018606;BmuPB009609;BmuPB017114;BmuPB009556;BmuPB010201;BmuPB002020;BmuPB015943;BmuPB011975;BmuPB012732;BmuPB003746;BmuPB000999;BmuPB001395;BmuPB011011;BmuPB013701;BmuPB014903;BmuPB020942;BmuPB006610;BmuPB014077;BmuPB015098;
		map05218	79	23	11.363	2.02411	0.006318	0.0249249	Melanoma	BmuPB016092;BmuPB006285;BmuPB009609;BmuPB009556;BmuPB002020;BmuPB005615;BmuPB006515;BmuPB018568;BmuPB012946;BmuPB011558;BmuPB000999;BmuPB002722;BmuPB015247;BmuPB009675;BmuPB009924;BmuPB014903;BmuPB020942;BmuPB017467;BmuPB006610;BmuPB015530;BmuPB009719;BmuPB013554;BmuPB004764;
		map04730	63	19	9.06166	2.09674	0.00706868	0.0275832	Longterm_depression	BmuPB020197;BmuPB016092;BmuPB004731;BmuPB015244;BmuPB009556;BmuPB011845;BmuPB010181;BmuPB011704;BmuPB018163;BmuPB007695;BmuPB009924;BmuPB016562;BmuPB020942;BmuPB004389;BmuPB019277;BmuPB016992;BmuPB009894;BmuPB001360;BmuPB011558;
		map04923	58	18	8.34248	2.15763	0.00810214	0.0309433	Regulation_of_lipolysis_in_adipocytes	BmuPB003746;BmuPB000999;BmuPB001395;BmuPB018606;BmuPB016882;BmuPB009609;BmuPB005605;BmuPB020959;BmuPB011704;BmuPB010201;BmuPB019648;BmuPB011011;BmuPB002020;BmuPB013701;BmuPB014903;BmuPB006610;BmuPB014077;BmuPB015098;
		map00620	46	15	6.61645	2.26708	0.0101955	0.0366018	Pyruvate_metabolism	BmuPB017976;BmuPB001552;BmuPB005274;BmuPB002847;BmuPB017099;BmuPB017937;BmuPB010240;BmuPB012998;BmuPB009427;BmuPB013782;BmuPB004581;BmuPB002109;BmuPB018396;BmuPB000506;BmuPB000803;
		map04960	38	13	5.46577	2.37844	0.0101429	0.0366018	Aldosteroneregulated_sodium_reabsorption	BmuPB020197;BmuPB016092;BmuPB018606;BmuPB009609;BmuPB003569;BmuPB016562;BmuPB014903;BmuPB004389;BmuPB006610;BmuPB012551;BmuPB013074;BmuPB013768;BmuPB013446;
cerebellum vs brain	GO	GO:0005515	4194	873	615.936	1.41735	2.57479e-16	1.60667e-13	molecular_function:protein binding	BmuPB009951;BmuPB016695;BmuPB002908;BmuPB018163;BmuPB002209;BmuPB002719;BmuPB015945;BmuPB000111;BmuPB019003;BmuPB009568;BmuPB011100;BmuPB005860;BmuPB016176;BmuPB010623;BmuPB017104;BmuPB019814;BmuPB005056;BmuPB011878;BmuPB003111;BmuPB003100;BmuPB021461;BmuPB003065;BmuPB011500;BmuPB015170;BmuPB010398;BmuPB018087;BmuPB018276;BmuPB022458;BmuPB009731;BmuPB018577;BmuPB006842;BmuPB009609;BmuPB002228;Bmu…
		GO:0004672	503	149	73.8712	2.01702	4.84522e-12	2.01561e-09	molecular_function:protein kinase activity	BmuPB021480;BmuPB010996;BmuPB010201;BmuPB018351;BmuPB012704;BmuPB009915;BmuPB009120;BmuPB005852;BmuPB017070;BmuPB008076;BmuPB004386;BmuPB018130;BmuPB009568;BmuPB017538;BmuPB000999;BmuPB012454;BmuPB003282;BmuPB017867;BmuPB010995;BmuPB011517;BmuPB017523;BmuPB015212;BmuPB014010;BmuPB005757;BmuPB017104;BmuPB016546;BmuPB016976;BmuPB012886;BmuPB000574;BmuPB016631;BmuPB011393;BmuPB009672;BmuPB005657;Bmu…
		GO:0006468	688	180	101.041	1.78146	1.61232e-10	5.03043e-08	biological_process:protein phosphorylation	BmuPB001463;BmuPB010201;BmuPB018351;BmuPB012704;BmuPB009915;BmuPB017070;BmuPB008076;BmuPB004386;BmuPB009568;BmuPB017538;BmuPB000999;BmuPB003535;BmuPB003282;BmuPB017867;BmuPB013065;BmuPB010995;BmuPB011517;BmuPB015212;BmuPB005860;BmuPB017104;BmuPB012886;BmuPB000574;BmuPB016631;BmuPB011393;BmuPB009672;BmuPB011928;BmuPB020683;BmuPB006690;BmuPB015849;BmuPB016882;BmuPB006337;BmuPB014101;BmuPB015109;Bmu…
		GO:0004713	415	123	60.9474	2.01813	2.22521e-10	5.55412e-08	molecular_function:protein tyrosine kinase activity	BmuPB010201;BmuPB018351;BmuPB009915;BmuPB009120;BmuPB005852;BmuPB008076;BmuPB004386;BmuPB018130;BmuPB009568;BmuPB017538;BmuPB000999;BmuPB012454;BmuPB017867;BmuPB011517;BmuPB017523;BmuPB015212;BmuPB014010;BmuPB005757;BmuPB017104;BmuPB016546;BmuPB016976;BmuPB012886;BmuPB011393;BmuPB009672;BmuPB011928;BmuPB010773;BmuPB006690;BmuPB007131;BmuPB015849;BmuPB006337;BmuPB009556;BmuPB014101;BmuPB011186;Bmu…
		GO:0005524	1643	326	241.293	1.35105	3.84581e-06	0.000479957	molecular_function:ATP binding	BmuPB009099;BmuPB013843;BmuPB001463;BmuPB009915;BmuPB006302;BmuPB005353;BmuPB004386;BmuPB008208;BmuPB009568;BmuPB007605;BmuPB000999;BmuPB003535;BmuPB011517;BmuPB013279;BmuPB005860;BmuPB017104;BmuPB012059;BmuPB000574;BmuPB011393;BmuPB019816;BmuPB009672;BmuPB012952;BmuPB013704;BmuPB004650;BmuPB008918;BmuPB012705;BmuPB003100;BmuPB000672;BmuPB003088;BmuPB006681;BmuPB003396;BmuPB015170;BmuPB010398;Bmu…
		GO:0005543	247	70	36.2747	1.92972	6.33301e-06	0.000718509	molecular_function:phospholipid binding	BmuPB016985;BmuPB019371;BmuPB015227;BmuPB013524;BmuPB004048;BmuPB015249;BmuPB001342;BmuPB000991;BmuPB006709;BmuPB004573;BmuPB001642;BmuPB014710;BmuPB002020;BmuPB018075;BmuPB005462;BmuPB018596;BmuPB009275;BmuPB010074;BmuPB018846;BmuPB006665;BmuPB012909;BmuPB002078;BmuPB000999;BmuPB000444;BmuPB004758;BmuPB016689;BmuPB005348;BmuPB007594;BmuPB011100;BmuPB006735;BmuPB017104;BmuPB020609;BmuPB009644;Bmu…
		GO:0008270	1095	225	160.813	1.39914	1.80414e-05	0.0018763	molecular_function:zinc ion binding	BmuPB009951;BmuPB003754;BmuPB000697;BmuPB016997;BmuPB008481;BmuPB015266;BmuPB001463;BmuPB000575;BmuPB006051;BmuPB012183;BmuPB012489;BmuPB014579;BmuPB021249;BmuPB002486;BmuPB010942;BmuPB013209;BmuPB001061;BmuPB008694;BmuPB004403;BmuPB002700;BmuPB008253;BmuPB013031;BmuPB011557;BmuPB011663;BmuPB011413;BmuPB001530;BmuPB011157;BmuPB017088;BmuPB013422;BmuPB009498;BmuPB015226;BmuPB017949;BmuPB017616;Bmu…
		GO:0035556	259	68	38.0371	1.78773	5.98481e-05	0.00574542	biological_process:intracellular signal transduction	BmuPB017685;BmuPB015062;BmuPB018163;BmuPB015380;BmuPB017472;BmuPB001425;BmuPB016394;BmuPB010950;BmuPB013849;BmuPB009644;BmuPB013786;BmuPB015098;BmuPB015630;BmuPB004403;BmuPB003111;BmuPB008822;BmuPB004943;BmuPB006681;BmuPB005697;BmuPB003746;BmuPB002658;BmuPB015778;BmuPB003565;BmuPB003164;BmuPB014077;BmuPB004744;BmuPB016559;BmuPB014151;BmuPB018385;BmuPB017665;BmuPB001906;BmuPB014892;BmuPB014937;Bmu…
		GO:0007165	669	145	98.2502	1.47582	6.65545e-05	0.00588032	biological_process:signal transduction	BmuPB016695;BmuPB002516;BmuPB018163;BmuPB004725;BmuPB016764;BmuPB005440;BmuPB011068;BmuPB011800;BmuPB016335;BmuPB011265;BmuPB014903;BmuPB016394;BmuPB022114;BmuPB016751;BmuPB002027;BmuPB002940;BmuPB007154;BmuPB012735;BmuPB012687;BmuPB002664;BmuPB007164;BmuPB015780;BmuPB006642;BmuPB002389;BmuPB006129;BmuPB018612;BmuPB020942;BmuPB008638;BmuPB019807;BmuPB001651;BmuPB011415;BmuPB009157;BmuPB016788;Bmu…
		GO:0004674	211	57	30.9877	1.83944	0.000149097	0.0109455	molecular_function:protein serine/threonine kinase activity	BmuPB011971;BmuPB009157;BmuPB014883;BmuPB017114;BmuPB010201;BmuPB016562;BmuPB002020;BmuPB003918;BmuPB012704;BmuPB002968;BmuPB010207;BmuPB002528;BmuPB003330;BmuPB011767;BmuPB011626;BmuPB011447;BmuPB017079;BmuPB000999;BmuPB003535;BmuPB000416;BmuPB013065;BmuPB011517;BmuPB000078;BmuPB017104;BmuPB012886;BmuPB011393;BmuPB009672;BmuPB016218;BmuPB020683;BmuPB020197;BmuPB009170;BmuPB001421;BmuPB016882;Bmu…
		GO:0043565	603	130	88.5573	1.46798	0.000176632	0.0122465	molecular_function:sequence-specific DNA binding	BmuPB016997;BmuPB015266;BmuPB003056;BmuPB015234;BmuPB013632;BmuPB010446;BmuPB005025;BmuPB006061;BmuPB006105;BmuPB011591;BmuPB019829;BmuPB008253;BmuPB013031;BmuPB007180;BmuPB017938;BmuPB008464;BmuPB001703;BmuPB013219;BmuPB001376;BmuPB006076;BmuPB008558;BmuPB002226;BmuPB009550;BmuPB018242;BmuPB007227;BmuPB015111;BmuPB015226;BmuPB006818;BmuPB012451;BmuPB015699;BmuPB010700;BmuPB007194;BmuPB008522;Bmu…
		GO:0008146	47	20	6.90248	2.89751	0.000294209	0.0193249	molecular_function:sulfotransferase activity	BmuPB012211;BmuPB019660;BmuPB014732;BmuPB016729;BmuPB018082;BmuPB021074;BmuPB020396;BmuPB008529;BmuPB014279;BmuPB013629;BmuPB001542;BmuPB006524;BmuPB007151;BmuPB003221;BmuPB004375;BmuPB003066;BmuPB015610;BmuPB001169;BmuPB008673;BmuPB003218;
	KEGG	map04360	175	63	25.7007	2.45129	1.65443e-08	3.02761e-06	Axon_guidance	BmuPB016649;BmuPB009609;BmuPB016562;BmuPB009120;BmuPB014694;BmuPB008125;BmuPB014058;BmuPB017866;BmuPB017106;BmuPB013751;BmuPB003189;BmuPB000444;BmuPB001746;BmuPB015458;BmuPB003769;BmuPB014903;BmuPB006610;BmuPB015530;BmuPB010610;BmuPB004618;BmuPB001028;BmuPB016154;BmuPB000603;BmuPB018165;BmuPB018408;BmuPB016092;BmuPB007126;BmuPB007488;BmuPB019048;BmuPB004700;BmuPB011704;BmuPB014101;BmuPB011186;Bmu…
		map04015	247	79	36.2747	2.17782	2.59338e-08	3.16392e-06	Rap1_signaling_pathway	BmuPB016649;BmuPB013436;BmuPB015062;BmuPB009609;BmuPB009107;BmuPB012463;BmuPB018163;BmuPB015380;BmuPB016562;BmuPB002020;BmuPB014940;BmuPB006515;BmuPB011068;BmuPB009092;BmuPB017522;BmuPB011508;BmuPB001547;BmuPB012946;BmuPB016992;BmuPB014392;BmuPB004717;BmuPB014694;BmuPB016989;BmuPB008029;BmuPB000999;BmuPB002722;BmuPB000444;BmuPB003282;BmuPB017867;BmuPB016760;BmuPB011011;BmuPB015212;BmuPB013701;Bmu…
		map04725	113	44	16.5953	2.65135	4.51258e-07	2.75267e-05	Cholinergic_synapse	BmuPB018887;BmuPB020197;BmuPB016092;BmuPB003283;BmuPB015244;BmuPB014081;BmuPB009609;BmuPB018599;BmuPB010181;BmuPB011704;BmuPB018163;BmuPB010201;BmuPB007695;BmuPB015380;BmuPB016951;BmuPB016562;BmuPB002020;BmuPB003187;BmuPB006687;BmuPB016992;BmuPB012136;BmuPB011026;BmuPB003746;BmuPB009883;BmuPB000999;BmuPB001395;BmuPB013424;BmuPB008540;BmuPB011011;BmuPB018420;BmuPB013701;BmuPB014903;BmuPB020942;Bmu…
		map04912	93	37	13.6581	2.70902	2.17829e-06	8.88174e-05	GnRH_signaling_pathway	BmuPB016092;BmuPB015849;BmuPB015244;BmuPB016680;BmuPB018163;BmuPB010201;BmuPB007695;BmuPB015380;BmuPB016562;BmuPB003212;BmuPB016992;BmuPB011767;BmuPB011558;BmuPB003746;BmuPB011026;BmuPB001395;BmuPB000465;BmuPB003282;BmuPB017867;BmuPB006393;BmuPB016760;BmuPB009924;BmuPB011011;BmuPB017868;BmuPB015212;BmuPB013701;BmuPB020942;BmuPB016546;BmuPB018125;BmuPB004433;BmuPB014077;BmuPB009498;BmuPB009894;Bmu…
		map04670	117	43	17.1828	2.50251	2.18403e-06	8.88174e-05	Leukocyte_transendothelial_migration	BmuPB020197;BmuPB004163;BmuPB006396;BmuPB004844;BmuPB009995;BmuPB015849;BmuPB015062;BmuPB019234;BmuPB009609;BmuPB005825;BmuPB004700;BmuPB011704;BmuPB014101;BmuPB016562;BmuPB003116;BmuPB004603;BmuPB017522;BmuPB001547;BmuPB004717;BmuPB019417;BmuPB008029;BmuPB011888;BmuPB000444;BmuPB021233;BmuPB017867;BmuPB013907;BmuPB009729;BmuPB015657;BmuPB017868;BmuPB015212;BmuPB014903;BmuPB016394;BmuPB012738;Bmu…
		map04510	205	63	30.1066	2.09257	2.15666e-06	8.88174e-05	Focal_adhesion	BmuPB006790;BmuPB004844;BmuPB019234;BmuPB009609;BmuPB006837;BmuPB009107;BmuPB001642;BmuPB016562;BmuPB002020;BmuPB006515;BmuPB011672;BmuPB001547;BmuPB004717;BmuPB014230;BmuPB011185;BmuPB016989;BmuPB008356;BmuPB003313;BmuPB000999;BmuPB011136;BmuPB017335;BmuPB012919;BmuPB014903;BmuPB012060;BmuPB017919;BmuPB017467;BmuPB006610;BmuPB010392;BmuPB016786;BmuPB015530;BmuPB010696;BmuPB009354;BmuPB016751;Bmu…
		map04916	98	38	14.3924	2.64028	3.74869e-06	0.000124729	Melanogenesis	BmuPB020197;BmuPB016092;BmuPB003111;BmuPB008906;BmuPB011704;BmuPB000099;BmuPB018163;BmuPB010201;BmuPB015380;BmuPB015314;BmuPB008247;BmuPB016562;BmuPB013499;BmuPB012434;BmuPB006704;BmuPB016992;BmuPB011558;BmuPB019623;BmuPB003746;BmuPB011026;BmuPB013702;BmuPB000100;BmuPB001395;BmuPB006351;BmuPB007932;BmuPB011778;BmuPB016760;BmuPB009924;BmuPB011011;BmuPB013701;BmuPB020942;BmuPB011841;BmuPB004433;Bmu…
		map04926	126	44	18.5045	2.3778	4.73018e-06	0.00014427	Relaxin_signaling_pathway	BmuPB016092;BmuPB009393;BmuPB009609;BmuPB011704;BmuPB018163;BmuPB010201;BmuPB015380;BmuPB008247;BmuPB016562;BmuPB002020;BmuPB003212;BmuPB006687;BmuPB006681;BmuPB016992;BmuPB012136;BmuPB016989;BmuPB011266;BmuPB011558;BmuPB003746;BmuPB009883;BmuPB000999;BmuPB001395;BmuPB013424;BmuPB000465;BmuPB017867;BmuPB018058;BmuPB009895;BmuPB011011;BmuPB009924;BmuPB017868;BmuPB015212;BmuPB013701;BmuPB012919;Bmu…
		map04550	136	46	19.9731	2.30309	5.93917e-06	0.000155267	Signaling_pathways_regulating_pluripotency_of_stem_cells	BmuPB009393;BmuPB009609;BmuPB008631;BmuPB000099;BmuPB018002;BmuPB002020;BmuPB003638;BmuPB011508;BmuPB011040;BmuPB014166;BmuPB005025;BmuPB000999;BmuPB007932;BmuPB017867;BmuPB016560;BmuPB015212;BmuPB007603;BmuPB014903;BmuPB006610;BmuPB011841;BmuPB008734;BmuPB006328;BmuPB000276;BmuPB016092;BmuPB003111;BmuPB008906;BmuPB009556;BmuPB020598;BmuPB005615;BmuPB008464;BmuPB013499;BmuPB014165;BmuPB006704;Bmu…
		map04928	102	38	14.9798	2.53674	5.66792e-06	0.000155267	Parathyroid_hormone_synthesis_secretion_and_action	BmuPB014567;BmuPB020197;BmuPB016092;BmuPB004731;BmuPB016284;BmuPB015244;BmuPB015266;BmuPB017312;BmuPB011704;BmuPB018163;BmuPB010201;BmuPB007695;BmuPB015380;BmuPB016562;BmuPB005615;BmuPB011618;BmuPB009561;BmuPB018367;BmuPB016992;BmuPB011558;BmuPB003746;BmuPB001395;BmuPB001331;BmuPB006393;BmuPB012092;BmuPB012091;BmuPB011011;BmuPB013701;BmuPB003096;BmuPB004433;BmuPB014027;BmuPB014077;BmuPB020257;Bmu…
		map04070	101	37	14.833	2.49444	9.68881e-06	0.000221631	Phosphatidylinositol_signaling_system	BmuPB020197;BmuPB015244;BmuPB001895;BmuPB009609;BmuPB002807;BmuPB008537;BmuPB018133;BmuPB018163;BmuPB007695;BmuPB011827;BmuPB015945;BmuPB016562;BmuPB005543;BmuPB005697;BmuPB016081;BmuPB016992;BmuPB007135;BmuPB009910;BmuPB004450;BmuPB002433;BmuPB000444;BmuPB002983;BmuPB015242;BmuPB016760;BmuPB007594;BmuPB017355;BmuPB016157;BmuPB014903;BmuPB006610;BmuPB018989;BmuPB001863;BmuPB016182;BmuPB000986;Bmu…
		map04371	152	49	22.3229	2.19505	1.04445e-05	0.000224865	Apelin_signaling_pathway	BmuPB009393;BmuPB016649;BmuPB017114;BmuPB018163;BmuPB010201;BmuPB007695;BmuPB015380;BmuPB002020;BmuPB006687;BmuPB018367;BmuPB014868;BmuPB016992;BmuPB012136;BmuPB021445;BmuPB011800;BmuPB009883;BmuPB000999;BmuPB007977;BmuPB012560;BmuPB006393;BmuPB016760;BmuPB011011;BmuPB013701;BmuPB014409;BmuPB002919;BmuPB006849;BmuPB003831;BmuPB015098;BmuPB016092;BmuPB015244;BmuPB016882;BmuPB011704;BmuPB003187;Bmu…
		map04724	121	41	17.7702	2.30723	1.63086e-05	0.000331609	Glutamatergic_synapse	BmuPB020197;BmuPB016092;BmuPB005385;BmuPB016661;BmuPB015244;BmuPB010181;BmuPB011704;BmuPB018163;BmuPB003109;BmuPB017847;BmuPB010201;BmuPB007695;BmuPB015380;BmuPB005747;BmuPB016562;BmuPB006687;BmuPB011703;BmuPB016992;BmuPB012136;BmuPB016869;BmuPB003746;BmuPB009883;BmuPB017472;BmuPB001395;BmuPB013424;BmuPB002405;BmuPB011011;BmuPB013701;BmuPB007411;BmuPB014409;BmuPB001627;BmuPB017104;BmuPB018125;Bmu…
		map04022	169	52	24.8195	2.09512	1.73644e-05	0.000334493	cGMPPKG_signaling_pathway	BmuPB004731;BmuPB005647;BmuPB018163;BmuPB007695;BmuPB015380;BmuPB002020;BmuPB003044;BmuPB000742;BmuPB018367;BmuPB014868;BmuPB016992;BmuPB017743;BmuPB015302;BmuPB000999;BmuPB006577;BmuPB003569;BmuPB005605;BmuPB016760;BmuPB011011;BmuPB013701;BmuPB016786;BmuPB014027;BmuPB004418;BmuPB015581;BmuPB011771;BmuPB003831;BmuPB015098;BmuPB011581;BmuPB016092;BmuPB007106;BmuPB015244;BmuPB018606;BmuPB011704;Bmu…
		map04611	118	40	17.3296	2.30819	2.14114e-05	0.000391829	Platelet_activation	BmuPB016985;BmuPB016092;BmuPB015244;BmuPB009609;BmuPB009908;BmuPB011704;BmuPB018163;BmuPB010201;BmuPB007695;BmuPB015380;BmuPB002020;BmuPB014940;BmuPB003187;BmuPB006214;BmuPB006681;BmuPB016992;BmuPB004717;BmuPB011266;BmuPB003746;BmuPB000999;BmuPB001395;BmuPB000465;BmuPB017867;BmuPB011011;BmuPB017868;BmuPB015212;BmuPB009686;BmuPB013701;BmuPB014903;BmuPB006610;BmuPB018125;BmuPB004433;BmuPB016786;Bmu…
		map05230	59	26	8.66481	3.00064	2.27286e-05	0.000396127	Central_carbon_metabolism_in_cancer	BmuPB016092;BmuPB018283;BmuPB008616;BmuPB000999;BmuPB005832;BmuPB009609;BmuPB013402;BmuPB009924;BmuPB008043;BmuPB002020;BmuPB005615;BmuPB008617;BmuPB006515;BmuPB014903;BmuPB020942;BmuPB015070;BmuPB006610;BmuPB009427;BmuPB011929;BmuPB004433;BmuPB011508;BmuPB015530;BmuPB009528;BmuPB003396;BmuPB001465;BmuPB011558;
		map04750	103	36	15.1267	2.3799	3.27929e-05	0.000444526	Inflammatory_mediator_regulation_of_TRP_channels	BmuPB020197;BmuPB015244;BmuPB009609;BmuPB018163;BmuPB003100;BmuPB010201;BmuPB007695;BmuPB015380;BmuPB016562;BmuPB010801;BmuPB016992;BmuPB007164;BmuPB011767;BmuPB004895;BmuPB003746;BmuPB011026;BmuPB011269;BmuPB001395;BmuPB000465;BmuPB000444;BmuPB003282;BmuPB017867;BmuPB016760;BmuPB015778;BmuPB011011;BmuPB017868;BmuPB015212;BmuPB013701;BmuPB014903;BmuPB006610;BmuPB016546;BmuPB018125;BmuPB003989;Bmu…
		map04933	103	36	15.1267	2.3799	3.27929e-05	0.000444526	AGERAGE_signaling_pathway_in_diabetic_complications	BmuPB003833;BmuPB016092;BmuPB009393;BmuPB009609;BmuPB020597;BmuPB004700;BmuPB018163;BmuPB020598;BmuPB011827;BmuPB008247;BmuPB016562;BmuPB002020;BmuPB018568;BmuPB006681;BmuPB020596;BmuPB016992;BmuPB011767;BmuPB016989;BmuPB011266;BmuPB000999;BmuPB000444;BmuPB000818;BmuPB017867;BmuPB018058;BmuPB006393;BmuPB015778;BmuPB007594;BmuPB017868;BmuPB015212;BmuPB012919;BmuPB014903;BmuPB020942;BmuPB006610;Bmu…
		map04925	95	34	13.9518	2.43696	3.18394e-05	0.000444526	Aldosterone_synthesis_and_secretion	BmuPB011581;BmuPB020197;BmuPB015244;BmuPB010065;BmuPB016882;BmuPB018163;BmuPB010201;BmuPB007695;BmuPB015380;BmuPB016562;BmuPB004701;BmuPB005608;BmuPB016992;BmuPB003746;BmuPB011026;BmuPB001395;BmuPB003569;BmuPB021180;BmuPB014097;BmuPB016760;BmuPB015778;BmuPB011011;BmuPB013701;BmuPB010770;BmuPB014027;BmuPB014077;BmuPB003297;BmuPB009894;BmuPB016911;BmuPB000369;BmuPB010609;BmuPB011771;BmuPB003831;Bmu…
		map04713	102	36	14.9798	2.40323	2.98279e-05	0.000444526	Circadian_entrainment	BmuPB020197;BmuPB016092;BmuPB015244;BmuPB011704;BmuPB018163;BmuPB010201;BmuPB007695;BmuPB015380;BmuPB020228;BmuPB016562;BmuPB006687;BmuPB006214;BmuPB003170;BmuPB016992;BmuPB012136;BmuPB003746;BmuPB011026;BmuPB009883;BmuPB017667;BmuPB017472;BmuPB001395;BmuPB013424;BmuPB018866;BmuPB016760;BmuPB011011;BmuPB013701;BmuPB014409;BmuPB004433;BmuPB013076;BmuPB012088;BmuPB014077;BmuPB003297;BmuPB001360;Bmu…
		map04140	147	46	21.5886	2.13075	3.15303e-05	0.000444526	Autophagy_animal	BmuPB016649;BmuPB009609;BmuPB002807;BmuPB017114;BmuPB010201;BmuPB007695;BmuPB002020;BmuPB004813;BmuPB019928;BmuPB017745;BmuPB017618;BmuPB004722;BmuPB011767;BmuPB008543;BmuPB019639;BmuPB021445;BmuPB015675;BmuPB000999;BmuPB007977;BmuPB014903;BmuPB006610;BmuPB016092;BmuPB016553;BmuPB018606;BmuPB002291;BmuPB018616;BmuPB009556;BmuPB017529;BmuPB011975;BmuPB013761;BmuPB015894;BmuPB011558;BmuPB011575;Bmu…
		map04934	162	48	23.7915	2.01753	6.85392e-05	0.000854596	Cushing_s_syndrome	BmuPB010065;BmuPB000099;BmuPB018163;BmuPB010201;BmuPB007695;BmuPB015380;BmuPB015314;BmuPB001622;BmuPB005608;BmuPB016992;BmuPB007932;BmuPB021180;BmuPB016560;BmuPB011011;BmuPB013701;BmuPB010770;BmuPB011841;BmuPB014027;BmuPB017010;BmuPB003297;BmuPB011771;BmuPB015098;BmuPB016092;BmuPB003111;BmuPB015244;BmuPB008906;BmuPB011845;BmuPB011704;BmuPB018849;BmuPB003065;BmuPB013499;BmuPB018568;BmuPB006704;Bmu…
		map04072	162	48	23.7915	2.01753	6.85392e-05	0.000854596	Phospholipase_D_signaling_pathway	BmuPB016649;BmuPB013436;BmuPB004731;BmuPB015062;BmuPB009609;BmuPB018163;BmuPB015380;BmuPB016562;BmuPB002020;BmuPB006515;BmuPB011068;BmuPB009092;BmuPB010074;BmuPB016992;BmuPB009910;BmuPB006558;BmuPB000999;BmuPB000444;BmuPB011011;BmuPB013701;BmuPB014903;BmuPB016394;BmuPB017467;BmuPB006610;BmuPB018125;BmuPB017526;BmuPB011727;BmuPB015098;BmuPB018984;BmuPB016092;BmuPB009170;BmuPB015849;BmuPB018606;Bmu…
		map04540	91	32	13.3644	2.39443	7.00489e-05	0.000854596	Gap_junction	BmuPB020197;BmuPB016092;BmuPB015244;BmuPB011704;BmuPB018163;BmuPB010201;BmuPB007695;BmuPB015380;BmuPB016562;BmuPB006515;BmuPB006214;BmuPB016992;BmuPB011558;BmuPB003746;BmuPB001395;BmuPB000465;BmuPB009987;BmuPB009924;BmuPB011011;BmuPB000624;BmuPB013701;BmuPB000086;BmuPB020942;BmuPB007411;BmuPB017467;BmuPB004433;BmuPB014077;BmuPB009894;BmuPB011928;BmuPB015098;BmuPB004764;BmuPB013515;
		map04911	82	30	12.0426	2.49115	8.78566e-05	0.00100486	Insulin_secretion	BmuPB020197;BmuPB015244;BmuPB005832;BmuPB018606;BmuPB018163;BmuPB010201;BmuPB019270;BmuPB015380;BmuPB016562;BmuPB009684;BmuPB016992;BmuPB005412;BmuPB008691;BmuPB003746;BmuPB011026;BmuPB001395;BmuPB018866;BmuPB004560;BmuPB003569;BmuPB005413;BmuPB011011;BmuPB013701;BmuPB020467;BmuPB016394;BmuPB014027;BmuPB003171;BmuPB014077;BmuPB009894;BmuPB011771;BmuPB015098;
		map04520	75	28	11.0146	2.54208	8.67524e-05	0.00100486	Adherens_junction	BmuPB016092;BmuPB009393;BmuPB006396;BmuPB004844;BmuPB004700;BmuPB009556;BmuPB015314;BmuPB005615;BmuPB002920;BmuPB014688;BmuPB004717;BmuPB003396;BmuPB006147;BmuPB019417;BmuPB011973;BmuPB013702;BmuPB000465;BmuPB006351;BmuPB014692;BmuPB013045;BmuPB018058;BmuPB005860;BmuPB004433;BmuPB003600;BmuPB015530;BmuPB001047;BmuPB005376;BmuPB002707;
		map04931	104	35	15.2736	2.29154	0.000101172	0.00108961	Insulin_resistance	BmuPB005832;BmuPB018606;BmuPB009609;BmuPB017114;BmuPB004564;BmuPB020598;BmuPB002020;BmuPB016626;BmuPB012704;BmuPB006681;BmuPB021535;BmuPB011767;BmuPB008555;BmuPB017900;BmuPB011266;BmuPB008856;BmuPB012547;BmuPB000999;BmuPB003266;BmuPB017007;BmuPB014692;BmuPB017937;BmuPB015778;BmuPB016445;BmuPB005860;BmuPB018561;BmuPB016682;BmuPB014903;BmuPB008815;BmuPB000800;BmuPB006610;BmuPB014027;BmuPB005644;Bmu…
		map05206	143	43	21.0012	2.04751	0.000104198	0.00108961	MicroRNAs_in_cancer	BmuPB014567;BmuPB006790;BmuPB002687;BmuPB004324;BmuPB016562;BmuPB006515;BmuPB009120;BmuPB003330;BmuPB000444;BmuPB007089;BmuPB011841;BmuPB015530;BmuPB010696;BmuPB013804;BmuPB000542;BmuPB006792;BmuPB001028;BmuPB020197;BmuPB003742;BmuPB001930;BmuPB020598;BmuPB020228;BmuPB018568;BmuPB011975;BmuPB012208;BmuPB003396;BmuPB011558;BmuPB013702;BmuPB018283;BmuPB017454;BmuPB015247;BmuPB010097;BmuPB015778;Bmu…
		map04721	68	26	9.98656	2.6035	0.000133153	0.00135373	Synaptic_vesicle_cycle	BmuPB018887;BmuPB011415;BmuPB009170;BmuPB016661;BmuPB001279;BmuPB016641;BmuPB010181;BmuPB019270;BmuPB011241;BmuPB010074;BmuPB019366;BmuPB016752;BmuPB020967;BmuPB009190;BmuPB006558;BmuPB016049;BmuPB020601;BmuPB004560;BmuPB020415;BmuPB001736;BmuPB016737;BmuPB013749;BmuPB003171;BmuPB009318;BmuPB004489;BmuPB018551;
		map05221	70	26	10.2803	2.52911	0.000170142	0.00168303	Acute_myeloid_leukemia	BmuPB016092;BmuPB008002;BmuPB009609;BmuPB020597;BmuPB017114;BmuPB015314;BmuPB020598;BmuPB002020;BmuPB018568;BmuPB003170;BmuPB020596;BmuPB011558;BmuPB017667;BmuPB000999;BmuPB008558;BmuPB006351;BmuPB003412;BmuPB005298;BmuPB009924;BmuPB005606;BmuPB014903;BmuPB020942;BmuPB006610;BmuPB004433;BmuPB005644;BmuPB015226;
		map05032	94	31	13.805	2.24557	0.000245268	0.00204019	Morphine_addiction	BmuPB018887;BmuPB020197;BmuPB009576;BmuPB010181;BmuPB011704;BmuPB010201;BmuPB015380;BmuPB016562;BmuPB006687;BmuPB001622;BmuPB017761;BmuPB012136;BmuPB003746;BmuPB009883;BmuPB019238;BmuPB001395;BmuPB013424;BmuPB011517;BmuPB006682;BmuPB011011;BmuPB013701;BmuPB014409;BmuPB017104;BmuPB003096;BmuPB013076;BmuPB014077;BmuPB001360;BmuPB011393;BmuPB015098;BmuPB016218;BmuPB010084;
		map04370	56	22	8.22423	2.67502	0.000260754	0.00207469	VEGF_signaling_pathway	BmuPB020197;BmuPB016092;BmuPB000999;BmuPB000444;BmuPB000465;BmuPB018352;BmuPB009609;BmuPB017867;BmuPB004700;BmuPB014101;BmuPB009924;BmuPB017868;BmuPB015212;BmuPB016562;BmuPB002020;BmuPB014903;BmuPB020942;BmuPB006610;BmuPB018125;BmuPB004433;BmuPB011266;BmuPB011558;
		map04668	111	35	16.3016	2.14703	0.000256116	0.00207469	TNF_signaling_pathway	BmuPB001390;BmuPB016092;BmuPB018575;BmuPB009609;BmuPB020228;BmuPB008247;BmuPB002020;BmuPB011834;BmuPB003212;BmuPB001987;BmuPB009275;BmuPB002869;BmuPB017001;BmuPB010596;BmuPB016816;BmuPB014537;BmuPB005610;BmuPB000999;BmuPB003282;BmuPB017867;BmuPB017868;BmuPB015212;BmuPB008928;BmuPB014903;BmuPB013557;BmuPB006610;BmuPB001294;BmuPB016546;BmuPB007374;BmuPB004433;BmuPB014027;BmuPB005644;BmuPB013447;Bmu…
		map04720	64	24	9.39912	2.55343	0.000300581	0.0022548	Longterm_potentiation	BmuPB020197;BmuPB016092;BmuPB015244;BmuPB015062;BmuPB018163;BmuPB010201;BmuPB007695;BmuPB016562;BmuPB012704;BmuPB016992;BmuPB011558;BmuPB011026;BmuPB012547;BmuPB013702;BmuPB016760;BmuPB009924;BmuPB011011;BmuPB007411;BmuPB020942;BmuPB004433;BmuPB012088;BmuPB016326;BmuPB014077;BmuPB003831;
		map04071	122	37	17.9171	2.06507	0.000301872	0.0022548	Sphingolipid_signaling_pathway	BmuPB020197;BmuPB016092;BmuPB006483;BmuPB014876;BmuPB004731;BmuPB009609;BmuPB018616;BmuPB004700;BmuPB011704;BmuPB004324;BmuPB018163;BmuPB010082;BmuPB016562;BmuPB002020;BmuPB006681;BmuPB001973;BmuPB016992;BmuPB016426;BmuPB011266;BmuPB011558;BmuPB001956;BmuPB000999;BmuPB017867;BmuPB015778;BmuPB009924;BmuPB020048;BmuPB017868;BmuPB015212;BmuPB014903;BmuPB020942;BmuPB006610;BmuPB001294;BmuPB004433;Bmu…
		map04930	48	20	7.04934	2.83715	0.000329908	0.00241493	Type_II_diabetes_mellitus	BmuPB018887;BmuPB016092;BmuPB008616;BmuPB006825;BmuPB018606;BmuPB009609;BmuPB010181;BmuPB005413;BmuPB015778;BmuPB008617;BmuPB014903;BmuPB006610;BmuPB009427;BmuPB006681;BmuPB004433;BmuPB005644;BmuPB003297;BmuPB011767;BmuPB005412;BmuPB011771;
		map04972	100	32	14.6861	2.17893	0.000345261	0.00247776	Pancreatic_secretion	BmuPB011581;BmuPB020197;BmuPB015244;BmuPB012339;BmuPB014957;BmuPB006740;BmuPB004700;BmuPB018599;BmuPB018163;BmuPB007695;BmuPB015380;BmuPB016562;BmuPB019010;BmuPB003044;BmuPB016992;BmuPB018567;BmuPB008691;BmuPB003746;BmuPB009093;BmuPB001395;BmuPB000284;BmuPB011157;BmuPB003569;BmuPB012560;BmuPB011011;BmuPB013701;BmuPB012446;BmuPB016326;BmuPB014077;BmuPB004418;BmuPB011271;BmuPB015098;
		map00534	27	14	3.96525	3.53067	0.000379195	0.00266895	Glycosaminoglycan_biosynthesis_heparan_sulfate_heparin	BmuPB012211;BmuPB003306;BmuPB014732;BmuPB003221;BmuPB017726;BmuPB018082;BmuPB004375;BmuPB021074;BmuPB012530;BmuPB016931;BmuPB008520;BmuPB008673;BmuPB003218;BmuPB006524;
		map04722	120	36	17.6233	2.04275	0.000425565	0.00282057	Neurotrophin_signaling_pathway	BmuPB013454;BmuPB016092;BmuPB012175;BmuPB008822;BmuPB009609;BmuPB009107;BmuPB004700;BmuPB020228;BmuPB002020;BmuPB013276;BmuPB012704;BmuPB009915;BmuPB009120;BmuPB011767;BmuPB011558;BmuPB012547;BmuPB011026;BmuPB000999;BmuPB000444;BmuPB004419;BmuPB017867;BmuPB016760;BmuPB009924;BmuPB017868;BmuPB015212;BmuPB014903;BmuPB020942;BmuPB006610;BmuPB004433;BmuPB003989;BmuPB016326;BmuPB020257;BmuPB005644;Bmu…
		map01521	88	29	12.9238	2.24392	0.000425073	0.00282057	EGFR_tyrosine_kinase_inhibitor_resistance	BmuPB020197;BmuPB016092;BmuPB012175;BmuPB009609;BmuPB017114;BmuPB009556;BmuPB020598;BmuPB016562;BmuPB002020;BmuPB006515;BmuPB018424;BmuPB011508;BmuPB003396;BmuPB011558;BmuPB018283;BmuPB000999;BmuPB000465;BmuPB000444;BmuPB007089;BmuPB009924;BmuPB014903;BmuPB005606;BmuPB020942;BmuPB017467;BmuPB006610;BmuPB004433;BmuPB015530;BmuPB020257;BmuPB004764;
		map04666	96	31	14.0987	2.19879	0.000431562	0.00282057	Fc_gamma_Rmediated_phagocytosis	BmuPB020197;BmuPB016092;BmuPB014075;BmuPB009995;BmuPB009609;BmuPB017360;BmuPB017114;BmuPB004700;BmuPB015945;BmuPB016562;BmuPB002020;BmuPB004677;BmuPB012208;BmuPB011767;BmuPB011558;BmuPB009910;BmuPB000999;BmuPB000444;BmuPB015778;BmuPB014542;BmuPB004550;BmuPB010630;BmuPB014903;BmuPB006610;BmuPB004433;BmuPB016786;BmuPB004543;BmuPB010970;BmuPB002707;BmuPB000117;BmuPB016154;
		map01522	95	31	13.9518	2.22193	0.000410264	0.00282057	Endocrine_resistance	BmuPB016092;BmuPB009609;BmuPB017114;BmuPB009556;BmuPB018143;BmuPB014101;BmuPB010201;BmuPB015380;BmuPB002020;BmuPB003232;BmuPB018568;BmuPB003396;BmuPB011558;BmuPB003746;BmuPB000999;BmuPB001395;BmuPB000465;BmuPB017867;BmuPB009924;BmuPB011011;BmuPB017868;BmuPB015212;BmuPB013701;BmuPB014903;BmuPB020942;BmuPB006610;BmuPB004433;BmuPB014077;BmuPB020257;BmuPB016075;BmuPB015098;
		map05223	68	24	9.98656	2.40323	0.000506502	0.0031962	Nonsmall_cell_lung_cancer	BmuPB020197;BmuPB016092;BmuPB012175;BmuPB015266;BmuPB009609;BmuPB020597;BmuPB020598;BmuPB016562;BmuPB002020;BmuPB018568;BmuPB017522;BmuPB020596;BmuPB003396;BmuPB011558;BmuPB000999;BmuPB000444;BmuPB015247;BmuPB000416;BmuPB009924;BmuPB014903;BmuPB020942;BmuPB006610;BmuPB004433;BmuPB010407;
		map04211	90	29	13.2175	2.19406	0.000519881	0.00322502	Longevity_regulating_pathway	BmuPB012175;BmuPB018606;BmuPB009609;BmuPB017114;BmuPB009556;BmuPB013500;BmuPB010201;BmuPB015380;BmuPB002020;BmuPB011975;BmuPB010648;BmuPB008543;BmuPB003746;BmuPB015675;BmuPB000999;BmuPB001395;BmuPB018888;BmuPB008842;BmuPB011011;BmuPB013701;BmuPB014903;BmuPB008916;BmuPB008815;BmuPB005606;BmuPB020942;BmuPB006610;BmuPB014027;BmuPB014077;BmuPB015098;
		map04971	71	25	10.4271	2.39759	0.000571831	0.00348817	Gastric_acid_secretion	BmuPB020197;BmuPB015244;BmuPB018599;BmuPB011704;BmuPB018163;BmuPB010201;BmuPB007695;BmuPB015380;BmuPB016562;BmuPB016992;BmuPB003746;BmuPB011026;BmuPB001395;BmuPB003569;BmuPB012560;BmuPB016760;BmuPB011011;BmuPB013701;BmuPB012738;BmuPB014077;BmuPB011271;BmuPB000556;BmuPB016545;BmuPB003831;BmuPB015098;
		map04213	65	23	9.54598	2.40939	0.000657193	0.00394316	Longevity_regulating_pathway_multiple_species	BmuPB012175;BmuPB004874;BmuPB018606;BmuPB009609;BmuPB017114;BmuPB009556;BmuPB010201;BmuPB015380;BmuPB002020;BmuPB015943;BmuPB011975;BmuPB003746;BmuPB000999;BmuPB001395;BmuPB011011;BmuPB005271;BmuPB013701;BmuPB008815;BmuPB014903;BmuPB020942;BmuPB006610;BmuPB014077;BmuPB015098;
		map04914	94	29	13.805	2.10069	0.00101913	0.00556717	Progesteronemediated_oocyte_maturation	BmuPB016092;BmuPB004743;BmuPB018606;BmuPB009609;BmuPB009556;BmuPB011704;BmuPB010201;BmuPB015380;BmuPB002020;BmuPB012704;BmuPB004386;BmuPB011558;BmuPB003746;BmuPB012547;BmuPB000999;BmuPB001395;BmuPB017867;BmuPB011011;BmuPB017868;BmuPB015212;BmuPB004455;BmuPB011632;BmuPB013701;BmuPB014903;BmuPB006610;BmuPB004433;BmuPB014077;BmuPB009672;BmuPB015098;
		map00562	72	24	10.574	2.26972	0.0010971	0.0057461	Inositol_phosphate_metabolism	BmuPB001895;BmuPB002807;BmuPB009178;BmuPB018133;BmuPB018163;BmuPB014890;BmuPB011827;BmuPB015945;BmuPB005543;BmuPB016081;BmuPB016992;BmuPB007135;BmuPB009910;BmuPB004450;BmuPB002433;BmuPB000444;BmuPB002983;BmuPB007594;BmuPB017355;BmuPB016157;BmuPB006610;BmuPB018989;BmuPB016182;BmuPB000986;
		map04340	51	19	7.48992	2.53674	0.00109271	0.0057461	Hedgehog_signaling_pathway	BmuPB007448;BmuPB014749;BmuPB006337;BmuPB015458;BmuPB006052;BmuPB010201;BmuPB000274;BmuPB011226;BmuPB018568;BmuPB017104;BmuPB013539;BmuPB003096;BmuPB011144;BmuPB020257;BmuPB000094;BmuPB013925;BmuPB011928;BmuPB011447;BmuPB016218;
		map04917	81	26	11.8958	2.18565	0.00119113	0.00597195	Prolactin_signaling_pathway	BmuPB016092;BmuPB018605;BmuPB012175;BmuPB018606;BmuPB016680;BmuPB009609;BmuPB020597;BmuPB009858;BmuPB020598;BmuPB002020;BmuPB018568;BmuPB008486;BmuPB020596;BmuPB011558;BmuPB003367;BmuPB000999;BmuPB000465;BmuPB017867;BmuPB009924;BmuPB017868;BmuPB015212;BmuPB014903;BmuPB020942;BmuPB011720;BmuPB006610;BmuPB004433;
		map04066	108	32	15.861	2.01753	0.00133058	0.00651743	HIF1_signaling_pathway	BmuPB020197;BmuPB016092;BmuPB008116;BmuPB005832;BmuPB018606;BmuPB009609;BmuPB017114;BmuPB009556;BmuPB020598;BmuPB008247;BmuPB016562;BmuPB002020;BmuPB008617;BmuPB018424;BmuPB003396;BmuPB011266;BmuPB011026;BmuPB013702;BmuPB009865;BmuPB008616;BmuPB000999;BmuPB000444;BmuPB013418;BmuPB009924;BmuPB014903;BmuPB005606;BmuPB013444;BmuPB008143;BmuPB006610;BmuPB002919;BmuPB004433;BmuPB020257;
		map04745	28	13	4.11212	3.16139	0.00133554	0.00651743	Phototransduction_fly	BmuPB011026;BmuPB017104;BmuPB004701;BmuPB016992;BmuPB004717;BmuPB012372;BmuPB016760;BmuPB018163;BmuPB016911;BmuPB007695;BmuPB003831;BmuPB016562;BmuPB016218;
		map04012	88	27	12.9238	2.08917	0.00179627	0.00832198	ErbB_signaling_pathway	BmuPB018165;BmuPB020197;BmuPB016092;BmuPB009609;BmuPB020597;BmuPB017114;BmuPB014101;BmuPB016562;BmuPB002020;BmuPB003212;BmuPB019273;BmuPB009120;BmuPB020596;BmuPB003396;BmuPB011558;BmuPB011026;BmuPB000999;BmuPB000465;BmuPB000444;BmuPB009924;BmuPB005606;BmuPB014903;BmuPB020942;BmuPB006610;BmuPB004433;BmuPB001028;BmuPB006806;
		map04923	58	20	8.51795	2.34798	0.00191997	0.00867542	Regulation_of_lipolysis_in_adipocytes	BmuPB003746;BmuPB000999;BmuPB001395;BmuPB018606;BmuPB016882;BmuPB009609;BmuPB005605;BmuPB020959;BmuPB011704;BmuPB010201;BmuPB019648;BmuPB015380;BmuPB011011;BmuPB002020;BmuPB013701;BmuPB014903;BmuPB006610;BmuPB006214;BmuPB014077;BmuPB015098;
		map04927	69	22	10.1334	2.17103	0.0026264	0.0112797	Cortisol_synthesis_and_secretion	BmuPB015244;BmuPB010065;BmuPB018163;BmuPB010201;BmuPB007695;BmuPB015380;BmuPB001622;BmuPB005608;BmuPB016992;BmuPB013003;BmuPB003746;BmuPB001395;BmuPB021180;BmuPB011011;BmuPB013701;BmuPB010770;BmuPB014027;BmuPB014077;BmuPB003297;BmuPB009894;BmuPB011771;BmuPB015098;
		map04730	63	21	9.25226	2.26972	0.00265041	0.0112797	Longterm_depression	BmuPB020197;BmuPB016092;BmuPB004731;BmuPB015244;BmuPB009556;BmuPB011845;BmuPB010181;BmuPB011704;BmuPB018163;BmuPB007695;BmuPB009924;BmuPB016562;BmuPB020942;BmuPB007411;BmuPB006214;BmuPB018125;BmuPB004433;BmuPB016992;BmuPB009894;BmuPB001360;BmuPB011558;
		map04664	78	24	11.4552	2.09512	0.00270373	0.0113743	Fc_epsilon_RI_signaling_pathway	BmuPB016092;BmuPB009995;BmuPB009609;BmuPB008776;BmuPB004700;BmuPB016562;BmuPB002020;BmuPB003212;BmuPB002681;BmuPB011558;BmuPB000999;BmuPB000444;BmuPB003282;BmuPB017867;BmuPB009924;BmuPB009686;BmuPB015212;BmuPB017868;BmuPB014903;BmuPB020942;BmuPB006610;BmuPB016546;BmuPB018125;BmuPB004433;
		map00515	24	11	3.52467	3.12086	0.00331867	0.0132025	Mannose_type_Oglycan_biosynthesis	BmuPB016754;BmuPB014308;BmuPB007151;BmuPB010939;BmuPB009110;BmuPB014408;BmuPB019347;BmuPB007645;BmuPB005657;BmuPB005862;BmuPB019711;
		map05211	75	23	11.0146	2.08814	0.00357218	0.0140582	Renal_cell_carcinoma	BmuPB018165;BmuPB016092;BmuPB005832;BmuPB009609;BmuPB009107;BmuPB004700;BmuPB002020;BmuPB019273;BmuPB015780;BmuPB011558;BmuPB013702;BmuPB000999;BmuPB009924;BmuPB014903;BmuPB020942;BmuPB008143;BmuPB006610;BmuPB003273;BmuPB004433;BmuPB015530;BmuPB016326;BmuPB001651;BmuPB001028;
		map05213	62	20	9.1054	2.1965	0.00418519	0.0157915	Endometrial_cancer	BmuPB016092;BmuPB012175;BmuPB013846;BmuPB006396;BmuPB000999;BmuPB015247;BmuPB006351;BmuPB009609;BmuPB016560;BmuPB015314;BmuPB009924;BmuPB002020;BmuPB014903;BmuPB020942;BmuPB006610;BmuPB018568;BmuPB004433;BmuPB003600;BmuPB003396;BmuPB011558;
		map04961	45	16	6.60876	2.42103	0.00586765	0.0214756	Endocrine_and_other_factorregulated_calcium_reabsorption	BmuPB006558;BmuPB011415;BmuPB020197;BmuPB009170;BmuPB003569;BmuPB016641;BmuPB018163;BmuPB010201;BmuPB016562;BmuPB013701;BmuPB011618;BmuPB010074;BmuPB016992;BmuPB016752;BmuPB020967;BmuPB015098;
		map05214	71	21	10.4271	2.01397	0.00733175	0.0262648	Glioma	BmuPB020197;BmuPB016092;BmuPB009609;BmuPB009556;BmuPB016562;BmuPB002020;BmuPB006515;BmuPB018568;BmuPB011558;BmuPB011026;BmuPB000999;BmuPB000444;BmuPB015247;BmuPB016760;BmuPB009924;BmuPB014903;BmuPB020942;BmuPB006610;BmuPB004433;BmuPB003831;BmuPB004764;
		map05217	63	19	9.25226	2.05355	0.0116765	0.0399402	Basal_cell_carcinoma	BmuPB019623;BmuPB007448;BmuPB013846;BmuPB003111;BmuPB000100;BmuPB015247;BmuPB006351;BmuPB008906;BmuPB007932;BmuPB011778;BmuPB006052;BmuPB016560;BmuPB000099;BmuPB015314;BmuPB013499;BmuPB000274;BmuPB011841;BmuPB006704;BmuPB011144;
		map00720	14	7	2.05606	3.40457	0.0128057	0.043397	Carbon_fixation_pathways_in_prokaryotes	BmuPB001598;BmuPB020582;BmuPB013584;BmuPB000506;BmuPB006580;BmuPB017099;BmuPB000803;
		map04330	48	15	7.04934	2.12786	0.0138414	0.0464767	Notch_signaling_pathway	BmuPB013702;BmuPB003111;BmuPB017998;BmuPB013067;BmuPB011471;BmuPB004736;BmuPB018143;BmuPB013241;BmuPB020666;BmuPB004809;BmuPB014615;BmuPB004587;BmuPB018103;BmuPB006704;BmuPB016075;
brainstem vs brain	GO	GO:0005515	4194	366	242.755	1.5077	1.15245e-10	9.91105e-08	molecular_function:protein binding	BmuPB009951;BmuPB002908;BmuPB018163;BmuPB015945;BmuPB009568;BmuPB011100;BmuPB005860;BmuPB016176;BmuPB010623;BmuPB009903;BmuPB003100;BmuPB021461;BmuPB011500;BmuPB010398;BmuPB018577;BmuPB016750;BmuPB014937;BmuPB005410;BmuPB000440;BmuPB017906;BmuPB004750;BmuPB009354;BmuPB011394;BmuPB020197;BmuPB007956;BmuPB017940;BmuPB019047;BmuPB002555;BmuPB018748;BmuPB009701;BmuPB016100;BmuPB010021;BmuPB021981;Bmu…
		GO:0005543	247	40	14.2967	2.79785	8.80818e-08	3.78752e-05	molecular_function:phospholipid binding	BmuPB016985;BmuPB019371;BmuPB015227;BmuPB009701;BmuPB006709;BmuPB002020;BmuPB009275;BmuPB012909;BmuPB017814;BmuPB004758;BmuPB019055;BmuPB005348;BmuPB011100;BmuPB020609;BmuPB009644;BmuPB004158;BmuPB009195;BmuPB010970;BmuPB012881;BmuPB010416;BmuPB014075;BmuPB007956;BmuPB009170;BmuPB008822;BmuPB012297;BmuPB011827;BmuPB012490;BmuPB006058;BmuPB005697;BmuPB005078;BmuPB019047;BmuPB012967;BmuPB016161;Bmu…
		GO:0043565	603	71	34.9025	2.03424	3.81693e-07	0.000109419	molecular_function:sequence-specific DNA binding	BmuPB015234;BmuPB013632;BmuPB001377;BmuPB006105;BmuPB011591;BmuPB000885;BmuPB007180;BmuPB008464;BmuPB000066;BmuPB003345;BmuPB013219;BmuPB006998;BmuPB009550;BmuPB003623;BmuPB017771;BmuPB010161;BmuPB007227;BmuPB015111;BmuPB008522;BmuPB005134;BmuPB001171;BmuPB011549;BmuPB009217;BmuPB014728;BmuPB000555;BmuPB016397;BmuPB004743;BmuPB003487;BmuPB012748;BmuPB018263;BmuPB019571;BmuPB012171;BmuPB019815;Bmu…
		GO:0007165	669	73	38.7227	1.8852	3.06119e-06	0.000658155	biological_process:signal transduction	BmuPB002516;BmuPB018163;BmuPB004725;BmuPB016764;BmuPB005440;BmuPB006880;BmuPB001377;BmuPB017014;BmuPB011265;BmuPB022114;BmuPB016751;BmuPB002027;BmuPB012687;BmuPB015780;BmuPB018612;BmuPB020942;BmuPB019807;BmuPB006844;BmuPB016750;BmuPB004831;BmuPB002417;BmuPB014937;BmuPB010928;BmuPB009092;BmuPB002968;BmuPB005989;BmuPB019055;BmuPB020957;BmuPB010970;BmuPB007956;BmuPB000449;BmuPB011827;BmuPB007441;Bmu…
		GO:0004672	503	59	29.1143	2.02649	3.8692e-06	0.000665502	molecular_function:protein kinase activity	BmuPB012704;BmuPB017070;BmuPB009568;BmuPB017538;BmuPB012454;BmuPB017867;BmuPB010995;BmuPB011517;BmuPB015212;BmuPB016546;BmuPB016976;BmuPB009672;BmuPB005657;BmuPB010773;BmuPB007131;BmuPB009556;BmuPB014101;BmuPB015109;BmuPB020228;BmuPB018265;BmuPB005615;BmuPB003088;BmuPB006214;BmuPB002920;BmuPB006681;BmuPB010165;BmuPB010398;BmuPB012966;BmuPB018283;BmuPB017868;BmuPB017541;BmuPB019852;BmuPB001263;Bmu…
		GO:0003700	986	94	57.071	1.64707	2.48653e-05	0.00356403	molecular_function:transcription factor activity, sequence-specific DNA binding	BmuPB020734;BmuPB009391;BmuPB015234;BmuPB018515;BmuPB006880;BmuPB001377;BmuPB006105;BmuPB011591;BmuPB000885;BmuPB013710;BmuPB007180;BmuPB008464;BmuPB000066;BmuPB021529;BmuPB003345;BmuPB013219;BmuPB006998;BmuPB009550;BmuPB003623;BmuPB017771;BmuPB010161;BmuPB009446;BmuPB007227;BmuPB009225;BmuPB008002;BmuPB008522;BmuPB005134;BmuPB001171;BmuPB011549;BmuPB009217;BmuPB005586;BmuPB020946;BmuPB014728;Bmu…
		GO:0004713	415	48	24.0208	1.99827	3.42063e-05	0.00420248	molecular_function:protein tyrosine kinase activity	BmuPB009568;BmuPB017538;BmuPB012454;BmuPB017867;BmuPB011517;BmuPB015212;BmuPB016546;BmuPB016976;BmuPB009672;BmuPB010773;BmuPB007131;BmuPB009556;BmuPB014101;BmuPB015109;BmuPB020228;BmuPB018265;BmuPB005615;BmuPB003088;BmuPB002920;BmuPB006214;BmuPB010165;BmuPB012966;BmuPB018283;BmuPB017541;BmuPB019852;BmuPB001263;BmuPB004695;BmuPB016562;BmuPB002020;BmuPB010207;BmuPB011508;BmuPB000078;BmuPB015530;Bmu…
		GO:0000976	185	27	10.7081	2.52147	5.326e-05	0.00572545	molecular_function:transcription regulatory region sequence-specific DNA binding	BmuPB002908;BmuPB018002;BmuPB003638;BmuPB015771;BmuPB003343;BmuPB016398;BmuPB003339;BmuPB009217;BmuPB006105;BmuPB006695;BmuPB014728;BmuPB016373;BmuPB016397;BmuPB017871;BmuPB016382;BmuPB003487;BmuPB010626;BmuPB000066;BmuPB015944;BmuPB006516;BmuPB003345;BmuPB003342;BmuPB006998;BmuPB017771;BmuPB007227;BmuPB016372;BmuPB003585;
		GO:0006468	688	68	39.8224	1.70758	0.000102354	0.00901175	biological_process:protein phosphorylation	BmuPB012704;BmuPB017070;BmuPB009568;BmuPB017538;BmuPB017867;BmuPB010995;BmuPB011517;BmuPB015212;BmuPB005860;BmuPB009672;BmuPB016882;BmuPB014101;BmuPB015109;BmuPB018265;BmuPB005615;BmuPB003088;BmuPB002920;BmuPB003787;BmuPB006681;BmuPB021529;BmuPB010398;BmuPB012966;BmuPB017868;BmuPB019852;BmuPB001263;BmuPB004695;BmuPB016562;BmuPB002020;BmuPB010928;BmuPB002968;BmuPB018398;BmuPB015530;BmuPB001028;Bmu…
		GO:0006836	44	10	2.54678	3.92652	0.000639354	0.0392746	biological_process:neurotransmitter transport	BmuPB011549;BmuPB003921;BmuPB011593;BmuPB000863;BmuPB013941;BmuPB001736;BmuPB019098;BmuPB011544;BmuPB003565;BmuPB006792;
	KEGG	map04010	310	52	17.9432	2.89803	4.40629e-10	7.38054e-08	MAPK_signaling_pathway	BmuPB009667;BmuPB013267;BmuPB011848;BmuPB012704;BmuPB006880;BmuPB017867;BmuPB015212;BmuPB011136;BmuPB010770;BmuPB016546;BmuPB003096;BmuPB010392;BmuPB015581;BmuPB016563;BmuPB004700;BmuPB009556;BmuPB020228;BmuPB005615;BmuPB002920;BmuPB018283;BmuPB017868;BmuPB020942;BmuPB013557;BmuPB015111;BmuPB013447;BmuPB018887;BmuPB004731;BmuPB010181;BmuPB002020;BmuPB016562;BmuPB012067;BmuPB011508;BmuPB011741;Bmu…
		map04015	247	43	14.2967	3.00769	4.82192e-09	5.38448e-07	Rap1_signaling_pathway	BmuPB013436;BmuPB013267;BmuPB009107;BmuPB012463;BmuPB018163;BmuPB016562;BmuPB002020;BmuPB014940;BmuPB009092;BmuPB017522;BmuPB011508;BmuPB019277;BmuPB001547;BmuPB004717;BmuPB008029;BmuPB017867;BmuPB005289;BmuPB019055;BmuPB015212;BmuPB016546;BmuPB015530;BmuPB013554;BmuPB020197;BmuPB000582;BmuPB019048;BmuPB004700;BmuPB009556;BmuPB011704;BmuPB005615;BmuPB006681;BmuPB019417;BmuPB018283;BmuPB001395;Bmu…
		map04931	104	22	6.01966	3.65469	1.51693e-06	0.000127043	Insulin_resistance	BmuPB000609;BmuPB005832;BmuPB002020;BmuPB012704;BmuPB006681;BmuPB017852;BmuPB021535;BmuPB017900;BmuPB011266;BmuPB006880;BmuPB008856;BmuPB012547;BmuPB003266;BmuPB017007;BmuPB012009;BmuPB017937;BmuPB016445;BmuPB005860;BmuPB000800;BmuPB014027;BmuPB005644;BmuPB013447;
		map04144	262	38	15.1649	2.50578	2.54585e-06	0.000170572	Endocytosis	BmuPB009701;BmuPB014595;BmuPB005930;BmuPB016752;BmuPB012724;BmuPB019627;BmuPB011517;BmuPB000348;BmuPB009147;BmuPB022320;BmuPB003096;BmuPB009170;BmuPB017974;BmuPB009178;BmuPB009556;BmuPB006681;BmuPB002424;BmuPB019017;BmuPB018283;BmuPB020942;BmuPB015492;BmuPB014204;BmuPB017949;BmuPB011551;BmuPB007225;BmuPB017360;BmuPB006709;BmuPB004677;BmuPB011508;BmuPB011957;BmuPB004158;BmuPB014075;BmuPB012490;Bmu…
		map04933	103	21	5.96178	3.52244	4.26481e-06	0.000238118	AGERAGE_signaling_pathway_in_diabetic_complications	BmuPB013267;BmuPB004700;BmuPB018163;BmuPB011827;BmuPB016562;BmuPB002020;BmuPB018568;BmuPB006681;BmuPB019277;BmuPB011266;BmuPB007908;BmuPB006880;BmuPB017867;BmuPB018058;BmuPB006393;BmuPB017868;BmuPB015212;BmuPB012919;BmuPB020942;BmuPB020257;BmuPB015581;
		map04611	118	22	6.83	3.22108	8.93827e-06	0.000272211	Platelet_activation	BmuPB016985;BmuPB008366;BmuPB011704;BmuPB018163;BmuPB007695;BmuPB002020;BmuPB014940;BmuPB006214;BmuPB006681;BmuPB019277;BmuPB004717;BmuPB011266;BmuPB007908;BmuPB016759;BmuPB001395;BmuPB017867;BmuPB019055;BmuPB017868;BmuPB015212;BmuPB016326;BmuPB017006;BmuPB016751;
		map04550	136	24	7.87187	3.04883	8.18798e-06	0.000272211	Signaling_pathways_regulating_pluripotency_of_stem_cells	BmuPB008631;BmuPB018002;BmuPB002020;BmuPB012067;BmuPB003638;BmuPB011508;BmuPB011040;BmuPB017867;BmuPB016560;BmuPB015212;BmuPB000276;BmuPB008906;BmuPB009556;BmuPB005615;BmuPB008464;BmuPB018263;BmuPB019623;BmuPB018283;BmuPB006998;BmuPB013846;BmuPB000100;BmuPB003623;BmuPB017868;BmuPB020942;
		map05206	143	25	8.27704	3.0204	6.22445e-06	0.000272211	MicroRNAs_in_cancer	BmuPB013267;BmuPB002687;BmuPB004324;BmuPB016562;BmuPB012067;BmuPB006880;BmuPB015530;BmuPB006792;BmuPB013554;BmuPB001028;BmuPB020197;BmuPB003742;BmuPB000885;BmuPB001930;BmuPB020228;BmuPB011227;BmuPB018568;BmuPB018283;BmuPB015247;BmuPB020942;BmuPB021178;BmuPB003245;BmuPB020257;BmuPB005644;BmuPB004764;
		map04510	205	31	11.8657	2.61258	8.90617e-06	0.000272211	Focal_adhesion	BmuPB013267;BmuPB009107;BmuPB016562;BmuPB002020;BmuPB012067;BmuPB001547;BmuPB004717;BmuPB011136;BmuPB012919;BmuPB012060;BmuPB010392;BmuPB015530;BmuPB009354;BmuPB016751;BmuPB006792;BmuPB013554;BmuPB001028;BmuPB020197;BmuPB004700;BmuPB009556;BmuPB014101;BmuPB018568;BmuPB007591;BmuPB012685;BmuPB007908;BmuPB020942;BmuPB021178;BmuPB016326;BmuPB020257;BmuPB001047;BmuPB004764;
		map04360	175	28	10.1292	2.76427	8.02668e-06	0.000272211	Axon_guidance	BmuPB016562;BmuPB014058;BmuPB017866;BmuPB017106;BmuPB013751;BmuPB003189;BmuPB015458;BmuPB015530;BmuPB010610;BmuPB004618;BmuPB001028;BmuPB016154;BmuPB007488;BmuPB019048;BmuPB004700;BmuPB011704;BmuPB014101;BmuPB009693;BmuPB006681;BmuPB005078;BmuPB010680;BmuPB005594;BmuPB007448;BmuPB015853;BmuPB009446;BmuPB007684;BmuPB020942;BmuPB015111;
		map04071	122	22	7.06153	3.11547	1.41152e-05	0.00039405	Sphingolipid_signaling_pathway	BmuPB020197;BmuPB004731;BmuPB004700;BmuPB011704;BmuPB004324;BmuPB018163;BmuPB016562;BmuPB002020;BmuPB006681;BmuPB019277;BmuPB001973;BmuPB011266;BmuPB006880;BmuPB017867;BmuPB017014;BmuPB017868;BmuPB015212;BmuPB020942;BmuPB020257;BmuPB004158;BmuPB013447;BmuPB009976;
		map05418	152	25	8.79797	2.84156	1.56305e-05	0.000402785	Fluid_shear_stress_and_atherosclerosis	BmuPB009667;BmuPB009125;BmuPB013267;BmuPB002020;BmuPB003774;BmuPB004717;BmuPB005643;BmuPB006880;BmuPB017867;BmuPB015212;BmuPB016546;BmuPB013554;BmuPB004700;BmuPB014807;BmuPB014101;BmuPB006681;BmuPB011266;BmuPB017868;BmuPB009922;BmuPB003245;BmuPB020257;BmuPB005644;BmuPB013447;BmuPB018385;BmuPB004764;
		map04670	117	21	6.77212	3.10095	2.31493e-05	0.000553929	Leukocyte_transendothelial_migration	BmuPB020197;BmuPB006396;BmuPB005825;BmuPB004700;BmuPB011704;BmuPB014101;BmuPB016562;BmuPB017522;BmuPB001547;BmuPB004717;BmuPB019417;BmuPB008029;BmuPB017867;BmuPB013907;BmuPB009729;BmuPB017868;BmuPB015212;BmuPB016326;BmuPB001047;BmuPB017047;BmuPB016751;
		map05165	354	43	20.49	2.09858	3.26488e-05	0.000729157	Human_papillomavirus_infection	BmuPB013267;BmuPB001973;BmuPB006880;BmuPB003259;BmuPB017014;BmuPB016560;BmuPB012091;BmuPB022320;BmuPB006792;BmuPB014101;BmuPB018103;BmuPB006681;BmuPB012685;BmuPB000471;BmuPB007908;BmuPB013846;BmuPB020942;BmuPB013447;BmuPB019023;BmuPB015314;BmuPB002020;BmuPB012067;BmuPB005779;BmuPB012919;BmuPB012060;BmuPB018234;BmuPB014027;BmuPB017869;BmuPB009354;BmuPB008906;BmuPB019625;BmuPB018568;BmuPB007591;Bmu…
		map04725	113	20	6.5406	3.05782	4.24214e-05	0.000888199	Cholinergic_synapse	BmuPB018887;BmuPB020197;BmuPB008366;BmuPB018599;BmuPB010181;BmuPB011704;BmuPB018163;BmuPB007695;BmuPB016951;BmuPB016562;BmuPB002020;BmuPB019277;BmuPB001395;BmuPB018420;BmuPB020942;BmuPB004614;BmuPB014027;BmuPB020257;BmuPB009894;BmuPB001360;
		map04926	126	21	7.29305	2.87945	5.99218e-05	0.00118081	Relaxin_signaling_pathway	BmuPB013267;BmuPB011704;BmuPB018163;BmuPB016562;BmuPB002020;BmuPB012067;BmuPB006681;BmuPB019277;BmuPB011266;BmuPB007908;BmuPB006880;BmuPB001395;BmuPB017867;BmuPB018058;BmuPB017868;BmuPB015212;BmuPB012919;BmuPB020942;BmuPB003096;BmuPB014027;BmuPB001360;
		map04540	91	17	5.26721	3.22752	8.59738e-05	0.00160007	Gap_junction	BmuPB020197;BmuPB011704;BmuPB018163;BmuPB007695;BmuPB016562;BmuPB012067;BmuPB006214;BmuPB019277;BmuPB001395;BmuPB005289;BmuPB009987;BmuPB000624;BmuPB020942;BmuPB003245;BmuPB009894;BmuPB013554;BmuPB004764;
		map04728	133	21	7.69822	2.7279	0.000117893	0.00197471	Dopaminergic_synapse	BmuPB018887;BmuPB010181;BmuPB018163;BmuPB007695;BmuPB016562;BmuPB002020;BmuPB005440;BmuPB019277;BmuPB001973;BmuPB021464;BmuPB017867;BmuPB017014;BmuPB005289;BmuPB000348;BmuPB015212;BmuPB014027;BmuPB020197;BmuPB011704;BmuPB017868;BmuPB001360;BmuPB019949;
		map04925	95	17	5.49873	3.09162	0.000135985	0.00216928	Aldosterone_synthesis_and_secretion	BmuPB011581;BmuPB020197;BmuPB016882;BmuPB018163;BmuPB007695;BmuPB016562;BmuPB019277;BmuPB004701;BmuPB005608;BmuPB001395;BmuPB021180;BmuPB014097;BmuPB010770;BmuPB014027;BmuPB009894;BmuPB013074;BmuPB016911;
		map05205	208	28	12.0393	2.32571	0.000142514	0.00217011	Proteoglycans_in_cancer	BmuPB013267;BmuPB007695;BmuPB016562;BmuPB002020;BmuPB012067;BmuPB003774;BmuPB004717;BmuPB012560;BmuPB017867;BmuPB015212;BmuPB011136;BmuPB010392;BmuPB015530;BmuPB017664;BmuPB020197;BmuPB008906;BmuPB004700;BmuPB009556;BmuPB014101;BmuPB005615;BmuPB018568;BmuPB019623;BmuPB007448;BmuPB000100;BmuPB017868;BmuPB020942;BmuPB018577;BmuPB018748;
		map04730	63	13	3.64653	3.56503	0.000241306	0.00351468	Longterm_depression	BmuPB020197;BmuPB004731;BmuPB009556;BmuPB010181;BmuPB011704;BmuPB018163;BmuPB007695;BmuPB016562;BmuPB020942;BmuPB006214;BmuPB019277;BmuPB009894;BmuPB001360;
		map04928	102	17	5.9039	2.87945	0.000285935	0.00383153	Parathyroid_hormone_synthesis_secretion_and_action	BmuPB020197;BmuPB004731;BmuPB011704;BmuPB018163;BmuPB007695;BmuPB016562;BmuPB005615;BmuPB019277;BmuPB001395;BmuPB006393;BmuPB012092;BmuPB012091;BmuPB003096;BmuPB014027;BmuPB020257;BmuPB004158;BmuPB009894;
		map04261	152	22	8.79797	2.50058	0.000298022	0.0038399	Adrenergic_signaling_in_cardiomyocytes	BmuPB018599;BmuPB018163;BmuPB016562;BmuPB002020;BmuPB019277;BmuPB001973;BmuPB015852;BmuPB012560;BmuPB017867;BmuPB017014;BmuPB015212;BmuPB014027;BmuPB016563;BmuPB011581;BmuPB008366;BmuPB011704;BmuPB020228;BmuPB016565;BmuPB001395;BmuPB017868;BmuPB020257;BmuPB013074;
		map04520	75	14	4.3411	3.22499	0.000349721	0.00433913	Adherens_junction	BmuPB006396;BmuPB004700;BmuPB009556;BmuPB015314;BmuPB005615;BmuPB002920;BmuPB004717;BmuPB019417;BmuPB011973;BmuPB018058;BmuPB005860;BmuPB015530;BmuPB001047;BmuPB021263;
		map04810	220	28	12.7339	2.19885	0.000364208	0.00435749	Regulation_of_actin_cytoskeleton	BmuPB004731;BmuPB004677;BmuPB011508;BmuPB001547;BmuPB004717;BmuPB008029;BmuPB011973;BmuPB012909;BmuPB017106;BmuPB012560;BmuPB012060;BmuPB016751;BmuPB013554;BmuPB001028;BmuPB016154;BmuPB008546;BmuPB015556;BmuPB004700;BmuPB014101;BmuPB016951;BmuPB005615;BmuPB007591;BmuPB018283;BmuPB014542;BmuPB020942;BmuPB001047;BmuPB009719;BmuPB004764;
		map05230	59	12	3.415	3.51391	0.000461595	0.00507139	Central_carbon_metabolism_in_cancer	BmuPB018283;BmuPB008616;BmuPB005832;BmuPB008043;BmuPB002020;BmuPB005615;BmuPB008617;BmuPB020942;BmuPB011929;BmuPB011508;BmuPB015530;BmuPB001465;
		map04721	68	13	3.93594	3.3029	0.000458799	0.00507139	Synaptic_vesicle_cycle	BmuPB018887;BmuPB009170;BmuPB016661;BmuPB010181;BmuPB011241;BmuPB016752;BmuPB004560;BmuPB001736;BmuPB015672;BmuPB016737;BmuPB003171;BmuPB004489;BmuPB007236;
		map05215	97	16	5.61449	2.84977	0.000469293	0.00507139	Prostate_cancer	BmuPB009556;BmuPB015314;BmuPB002020;BmuPB005615;BmuPB012067;BmuPB018568;BmuPB011508;BmuPB005643;BmuPB006880;BmuPB020942;BmuPB014027;BmuPB020257;BmuPB005644;BmuPB013554;BmuPB021263;BmuPB004764;
		map04722	120	18	6.94577	2.59151	0.00059414	0.00621991	Neurotrophin_signaling_pathway	BmuPB008822;BmuPB009107;BmuPB004700;BmuPB020228;BmuPB002020;BmuPB012067;BmuPB012704;BmuPB006880;BmuPB012547;BmuPB017867;BmuPB017868;BmuPB015212;BmuPB020942;BmuPB003245;BmuPB016326;BmuPB020257;BmuPB005644;BmuPB018748;
		map04310	142	20	8.21916	2.43334	0.000725489	0.0071482	Wnt_signaling_pathway	BmuPB011471;BmuPB019644;BmuPB018163;BmuPB015314;BmuPB016562;BmuPB019277;BmuPB016560;BmuPB015581;BmuPB021263;BmuPB020197;BmuPB008906;BmuPB004700;BmuPB002920;BmuPB018568;BmuPB019623;BmuPB013846;BmuPB000100;BmuPB005635;BmuPB009446;BmuPB013539;
		map04912	93	15	5.38297	2.78657	0.000850135	0.00813701	GnRH_signaling_pathway	BmuPB018163;BmuPB007695;BmuPB016562;BmuPB012067;BmuPB019277;BmuPB001395;BmuPB017867;BmuPB006393;BmuPB017868;BmuPB015212;BmuPB020942;BmuPB016546;BmuPB003245;BmuPB004158;BmuPB009894;
		map04370	56	11	3.24136	3.39364	0.001006	0.00928412	VEGF_signaling_pathway	BmuPB020197;BmuPB013267;BmuPB017867;BmuPB004700;BmuPB014101;BmuPB017868;BmuPB015212;BmuPB016562;BmuPB002020;BmuPB020942;BmuPB011266;
		map05211	75	13	4.3411	2.99463	0.00102541	0.00928412	Renal_cell_carcinoma	BmuPB005832;BmuPB013267;BmuPB009107;BmuPB004700;BmuPB002020;BmuPB012067;BmuPB015780;BmuPB020942;BmuPB015530;BmuPB016326;BmuPB018748;BmuPB001028;BmuPB013554;
		map04916	98	15	5.67238	2.64439	0.00135752	0.0114363	Melanogenesis	BmuPB020197;BmuPB008906;BmuPB011704;BmuPB018163;BmuPB015314;BmuPB016562;BmuPB012434;BmuPB019277;BmuPB019623;BmuPB000100;BmuPB001395;BmuPB020942;BmuPB014027;BmuPB001360;BmuPB021263;
		map01521	88	14	5.09356	2.74857	0.0013955	0.0114363	EGFR_tyrosine_kinase_inhibitor_resistance	BmuPB020197;BmuPB013267;BmuPB009556;BmuPB016562;BmuPB002020;BmuPB012067;BmuPB011508;BmuPB018283;BmuPB020942;BmuPB015530;BmuPB020257;BmuPB018748;BmuPB013554;BmuPB004764;
		map04380	128	18	7.40882	2.42954	0.00139966	0.0114363	Osteoclast_differentiation	BmuPB002020;BmuPB012067;BmuPB006880;BmuPB012009;BmuPB017867;BmuPB015212;BmuPB003686;BmuPB016546;BmuPB015581;BmuPB004700;BmuPB007180;BmuPB014807;BmuPB018058;BmuPB010161;BmuPB017868;BmuPB013557;BmuPB005644;BmuPB013447;
		map04390	158	21	9.14526	2.29627	0.00134045	0.0114363	Hippo_signaling_pathway	BmuPB003109;BmuPB015314;BmuPB004717;BmuPB018515;BmuPB008029;BmuPB003259;BmuPB016560;BmuPB010623;BmuPB011591;BmuPB021263;BmuPB006396;BmuPB008906;BmuPB000274;BmuPB018568;BmuPB006681;BmuPB019623;BmuPB013846;BmuPB000100;BmuPB018058;BmuPB013539;BmuPB012063;
		map04070	101	15	5.84602	2.56585	0.00176902	0.0137819	Phosphatidylinositol_signaling_system	BmuPB020197;BmuPB001895;BmuPB008537;BmuPB018133;BmuPB018163;BmuPB007695;BmuPB011827;BmuPB015945;BmuPB016562;BmuPB005697;BmuPB016081;BmuPB019277;BmuPB015242;BmuPB007791;BmuPB018989;
		map04022	169	21	9.78195	2.14681	0.0021672	0.0165003	cGMPPKG_signaling_pathway	BmuPB004731;BmuPB018163;BmuPB007695;BmuPB002020;BmuPB021981;BmuPB019277;BmuPB015852;BmuPB017743;BmuPB006577;BmuPB014027;BmuPB015581;BmuPB011581;BmuPB008366;BmuPB011704;BmuPB006214;BmuPB011266;BmuPB001395;BmuPB004545;BmuPB009446;BmuPB009894;BmuPB013074;
		map05217	63	11	3.64653	3.01657	0.00230005	0.0171226	Basal_cell_carcinoma	BmuPB019623;BmuPB007448;BmuPB013846;BmuPB000100;BmuPB015247;BmuPB008906;BmuPB006052;BmuPB016560;BmuPB015314;BmuPB000274;BmuPB021263;
		map05226	158	20	9.14526	2.18693	0.00245213	0.0174779	Gastric_cancer	BmuPB015314;BmuPB002020;BmuPB012067;BmuPB011508;BmuPB016560;BmuPB018234;BmuPB015530;BmuPB021263;BmuPB006396;BmuPB008906;BmuPB018568;BmuPB019623;BmuPB013846;BmuPB000100;BmuPB015247;BmuPB018058;BmuPB020942;BmuPB020257;BmuPB009719;BmuPB018748;
		map04668	111	16	6.42483	2.49034	0.0024072	0.0174779	TNF_signaling_pathway	BmuPB020228;BmuPB002020;BmuPB009275;BmuPB017001;BmuPB006880;BmuPB012009;BmuPB017867;BmuPB010161;BmuPB017868;BmuPB015212;BmuPB013557;BmuPB016546;BmuPB014027;BmuPB005644;BmuPB013447;BmuPB016075;
		map04745	28	7	1.62068	4.31918	0.00257368	0.0179621	Phototransduction_fly	BmuPB019277;BmuPB004701;BmuPB004717;BmuPB018163;BmuPB016911;BmuPB007695;BmuPB016562;
		map04666	96	14	5.55661	2.51952	0.00286255	0.018803	Fc_gamma_Rmediated_phagocytosis	BmuPB020197;BmuPB014075;BmuPB017360;BmuPB004700;BmuPB015945;BmuPB012490;BmuPB016562;BmuPB002020;BmuPB004677;BmuPB014542;BmuPB010630;BmuPB004158;BmuPB010970;BmuPB016154;
		map04910	146	19	8.45068	2.24834	0.00281467	0.018803	Insulin_signaling_pathway	BmuPB009107;BmuPB015945;BmuPB002020;BmuPB008617;BmuPB012067;BmuPB009993;BmuPB017007;BmuPB012009;BmuPB005860;BmuPB000800;BmuPB000609;BmuPB004762;BmuPB016882;BmuPB006681;BmuPB008616;BmuPB003266;BmuPB017937;BmuPB020942;BmuPB005644;
		map04919	114	16	6.59848	2.4248	0.00275098	0.018803	Thyroid_hormone_signaling_pathway	BmuPB020197;BmuPB005832;BmuPB018163;BmuPB011827;BmuPB016562;BmuPB002020;BmuPB018568;BmuPB019277;BmuPB004717;BmuPB009106;BmuPB017743;BmuPB012560;BmuPB016445;BmuPB020942;BmuPB002599;BmuPB013074;
		map04934	162	20	9.37678	2.13293	0.00296158	0.0190794	Cushing_s_syndrome	BmuPB018163;BmuPB007695;BmuPB015314;BmuPB001622;BmuPB019277;BmuPB005608;BmuPB021180;BmuPB016560;BmuPB010770;BmuPB014027;BmuPB021263;BmuPB008906;BmuPB011704;BmuPB018568;BmuPB019623;BmuPB013846;BmuPB001395;BmuPB000100;BmuPB016326;BmuPB009894;
		map05225	171	21	9.89772	2.1217	0.00353362	0.0223351	Hepatocellular_carcinoma	BmuPB015314;BmuPB016562;BmuPB002020;BmuPB012067;BmuPB004717;BmuPB016560;BmuPB018234;BmuPB015530;BmuPB021569;BmuPB021263;BmuPB020197;BmuPB008906;BmuPB009556;BmuPB018568;BmuPB019623;BmuPB013846;BmuPB000100;BmuPB015247;BmuPB018058;BmuPB020942;BmuPB018748;
		map05221	70	11	4.0517	2.71491	0.00469709	0.0286095	Acute_myeloid_leukemia	BmuPB008002;BmuPB015314;BmuPB002020;BmuPB012067;BmuPB018568;BmuPB006880;BmuPB003412;BmuPB005298;BmuPB020942;BmuPB005644;BmuPB021263;
		map04920	71	11	4.10958	2.67667	0.00516025	0.0303278	Adipocytokine_signaling_pathway	BmuPB000609;BmuPB005832;BmuPB002020;BmuPB017852;BmuPB017900;BmuPB006880;BmuPB012009;BmuPB017937;BmuPB016031;BmuPB005644;BmuPB013447;
		map04971	71	11	4.10958	2.67667	0.00516025	0.0303278	Gastric_acid_secretion	BmuPB020197;BmuPB018599;BmuPB011704;BmuPB018163;BmuPB007695;BmuPB016562;BmuPB019277;BmuPB001395;BmuPB012560;BmuPB013074;BmuPB016545;
		map04911	82	12	4.74627	2.5283	0.00536942	0.031013	Insulin_secretion	BmuPB020197;BmuPB005832;BmuPB018163;BmuPB016562;BmuPB016833;BmuPB019277;BmuPB001395;BmuPB004560;BmuPB014027;BmuPB003171;BmuPB009894;BmuPB013074;
		map00562	72	11	4.16746	2.6395	0.00565871	0.0315945	Inositol_phosphate_metabolism	BmuPB008366;BmuPB001895;BmuPB009178;BmuPB018133;BmuPB018163;BmuPB011827;BmuPB015945;BmuPB016081;BmuPB019277;BmuPB007791;BmuPB018989;
		map05120	72	11	4.16746	2.6395	0.00565871	0.0315945	Epithelial_cell_signaling_in_Helicobacter_pylori_infection	BmuPB004700;BmuPB011241;BmuPB006880;BmuPB017867;BmuPB013907;BmuPB015672;BmuPB015212;BmuPB017868;BmuPB015530;BmuPB005644;BmuPB007236;
		map05213	62	10	3.58865	2.78657	0.00583965	0.0320702	Endometrial_cancer	BmuPB013846;BmuPB006396;BmuPB015247;BmuPB016560;BmuPB015314;BmuPB002020;BmuPB020942;BmuPB012067;BmuPB018568;BmuPB021263;
		map01040	26	6	1.50492	3.98693	0.00716516	0.038715	Biosynthesis_of_unsaturated_fatty_acids	BmuPB016916;BmuPB010211;BmuPB018317;BmuPB008240;BmuPB008515;BmuPB006646;
		map05210	91	13	5.26721	2.4681	0.00737055	0.0391926	Colorectal_cancer	BmuPB004700;BmuPB015314;BmuPB002020;BmuPB012067;BmuPB018568;BmuPB009092;BmuPB013846;BmuPB015247;BmuPB018058;BmuPB016560;BmuPB020942;BmuPB020257;BmuPB021263;
		map04072	162	19	9.37678	2.02628	0.00763918	0.0393712	Phospholipase_D_signaling_pathway	BmuPB013436;BmuPB004731;BmuPB018163;BmuPB016562;BmuPB002020;BmuPB012067;BmuPB009092;BmuPB019277;BmuPB004158;BmuPB013554;BmuPB008366;BmuPB009170;BmuPB012718;BmuPB008537;BmuPB005697;BmuPB001395;BmuPB020942;BmuPB018748;BmuPB004764;
		map04150	162	19	9.37678	2.02628	0.00763918	0.0393712	mTOR_signaling_pathway	BmuPB016950;BmuPB016562;BmuPB002020;BmuPB012067;BmuPB012704;BmuPB015672;BmuPB007948;BmuPB001465;BmuPB007236;BmuPB020197;BmuPB008906;BmuPB009556;BmuPB019623;BmuPB012547;BmuPB000100;BmuPB014602;BmuPB020942;BmuPB005644;BmuPB013447;
		map05231	107	14	6.19331	2.2605	0.00777681	0.0394732	Choline_metabolism_in_cancer	BmuPB020197;BmuPB008537;BmuPB004700;BmuPB016562;BmuPB002020;BmuPB012067;BmuPB009092;BmuPB005697;BmuPB020942;BmuPB009856;BmuPB004158;BmuPB012823;BmuPB013554;BmuPB004764;
		map04726	126	16	7.29305	2.19387	0.00806174	0.0403087	Serotonergic_synapse	BmuPB018887;BmuPB020197;BmuPB009667;BmuPB010181;BmuPB011704;BmuPB018163;BmuPB003100;BmuPB007695;BmuPB016562;BmuPB003098;BmuPB019277;BmuPB013608;BmuPB015737;BmuPB013605;BmuPB020942;BmuPB001360;
		map04914	94	13	5.44085	2.38933	0.00820125	0.0404032	Progesteronemediated_oocyte_maturation	BmuPB004743;BmuPB009903;BmuPB009556;BmuPB011704;BmuPB002020;BmuPB012704;BmuPB012547;BmuPB001395;BmuPB017867;BmuPB017868;BmuPB015212;BmuPB012879;BmuPB009672;
		map04660	131	16	7.58246	2.11013	0.00940283	0.0456514	T_cell_receptor_signaling_pathway	BmuPB004730;BmuPB002020;BmuPB012067;BmuPB006880;BmuPB017867;BmuPB015212;BmuPB010630;BmuPB015581;BmuPB001028;BmuPB007131;BmuPB017612;BmuPB017519;BmuPB013565;BmuPB017868;BmuPB020942;BmuPB005644;
		map04723	152	18	8.79797	2.04593	0.00985335	0.0464912	Retrograde_endocannabinoid_signaling	BmuPB018887;BmuPB016661;BmuPB010181;BmuPB018163;BmuPB007695;BmuPB019648;BmuPB016562;BmuPB019277;BmuPB004701;BmuPB017867;BmuPB006682;BmuPB015212;BmuPB020197;BmuPB011704;BmuPB001395;BmuPB017868;BmuPB001360;BmuPB016911;
		map04922	98	13	5.67238	2.29181	0.0098194	0.0464912	Glucagon_signaling_pathway	BmuPB000609;BmuPB005832;BmuPB018163;BmuPB007695;BmuPB002020;BmuPB017852;BmuPB019277;BmuPB017900;BmuPB017007;BmuPB017171;BmuPB017937;BmuPB000800;BmuPB014027;
		map04970	100	13	5.78814	2.24597	0.0108634	0.0498528	Salivary_secretion	BmuPB011581;BmuPB020197;BmuPB018163;BmuPB007695;BmuPB016562;BmuPB016833;BmuPB006214;BmuPB019277;BmuPB015852;BmuPB001395;BmuPB012560;BmuPB003171;BmuPB013074;
