# Supplementary material for: Genome-Wide DNA Methylation and Hydroxymethylation Changes Revealed Epigenetic Regulation of Neuromodulation and Myelination in Yak Hypothalamus
Source: Front Genet. 2021 Sep 27;12:592135. doi: 10.3389/fgene.2021.592135 (PMC8503545; doi:10.3389/fgene.2021.592135)
Supplement: Supplementary file 11 [file Table_10.XLSX]

## Sheet: Sheet1
Supplymentary table 10.GO and KEGG enriched terms for DEGs in cattle
Group	Enrichment	Term	Category	Observed	Expected	FoldChange	rawP	adjP	Term_Name	GeneList
hypothalamus vs cerebellum	GO	GO:0006811	380	10	2.13018	4.69444	0.000112195	0.0258048	biological_process:ion transport	BmuPB015848;BmuPB009576;BmuPB005176;BmuPB001437;BmuPB000666;BmuPB012456;BmuPB004889;BmuPB009305;BmuPB010598;BmuPB019722;
	KEGG	map05033	40	4	0.224229	17.8389	0.000117784	0.0171965	Nicotine_addiction	BmuPB009576;BmuPB000666;BmuPB007815;BmuPB017195;
		map04080	293	8	1.64248	4.87069	0.00040407	0.0294971	Neuroactive_ligandreceptor_interaction	BmuPB015848;BmuPB009576;BmuPB000666;BmuPB000695;BmuPB004075;BmuPB014426;BmuPB010224;BmuPB007815;
hypothalamus vs brainstem	GO	GO:0005216	256	36	8.48512	4.24272	1.36854e-11	7.63647e-09	molecular_function:ion channel activity	BmuPB005115;BmuPB007695;BmuPB003930;BmuPB001437;BmuPB014422;BmuPB003297;BmuPB010775;BmuPB005116;BmuPB001050;BmuPB004889;BmuPB003929;BmuPB009305;BmuPB018887;BmuPB010181;BmuPB005113;BmuPB015921;BmuPB007092;BmuPB000668;BmuPB014682;BmuPB013505;BmuPB000408;BmuPB011090;BmuPB003952;BmuPB005408;BmuPB011011;BmuPB016474;BmuPB016525;BmuPB016628;BmuPB016337;BmuPB016052;BmuPB009436;BmuPB007002;BmuPB005233;Bmu…
		GO:0006811	380	44	12.5951	3.49342	3.10842e-11	8.67248e-09	biological_process:ion transport	BmuPB005115;BmuPB009576;BmuPB007695;BmuPB010875;BmuPB003930;BmuPB001437;BmuPB014422;BmuPB003297;BmuPB010775;BmuPB012761;BmuPB005116;BmuPB014400;BmuPB001050;BmuPB004889;BmuPB003929;BmuPB009305;BmuPB018887;BmuPB010181;BmuPB005113;BmuPB015921;BmuPB007092;BmuPB000668;BmuPB014682;BmuPB013505;BmuPB000408;BmuPB011090;BmuPB003952;BmuPB005408;BmuPB006682;BmuPB011011;BmuPB016474;BmuPB018420;BmuPB016525;Bmu…
		GO:0005515	4194	225	139.01	1.61859	3.30152e-09	6.14082e-07	molecular_function:protein binding	BmuPB020071;BmuPB009568;BmuPB012571;BmuPB011100;BmuPB021123;BmuPB005056;BmuPB016217;BmuPB007588;BmuPB013016;BmuPB015050;BmuPB020197;BmuPB004837;BmuPB005204;BmuPB007462;BmuPB009927;BmuPB012835;BmuPB002803;BmuPB008527;BmuPB014863;BmuPB022057;BmuPB000358;BmuPB005260;BmuPB015249;BmuPB003904;BmuPB017340;BmuPB014884;BmuPB015777;BmuPB006675;BmuPB002033;BmuPB017847;BmuPB008410;BmuPB009126;BmuPB005233;Bmu…
		GO:0055085	419	41	13.8878	2.95224	1.14236e-08	1.59359e-06	biological_process:transmembrane transport	BmuPB007695;BmuPB003930;BmuPB000841;BmuPB014422;BmuPB003297;BmuPB010775;BmuPB001050;BmuPB004889;BmuPB008766;BmuPB003929;BmuPB009305;BmuPB018887;BmuPB016661;BmuPB016739;BmuPB019429;BmuPB010181;BmuPB007092;BmuPB006190;BmuPB000668;BmuPB014682;BmuPB013505;BmuPB000408;BmuPB011090;BmuPB003952;BmuPB014039;BmuPB005408;BmuPB016474;BmuPB009535;BmuPB007294;BmuPB016628;BmuPB014137;BmuPB014658;BmuPB009436;Bmu…
		GO:0004970	17	9	0.563465	15.9726	7.20838e-08	6.7038e-06	molecular_function:ionotropic glutamate receptor activity	BmuPB006920;BmuPB017472;BmuPB012088;BmuPB008949;BmuPB016337;BmuPB018918;BmuPB007815;BmuPB013658;BmuPB016710;
		GO:0005234	17	9	0.563465	15.9726	7.20838e-08	6.7038e-06	molecular_function:extracellular-glutamate-gated ion channel activity	BmuPB006920;BmuPB017472;BmuPB012088;BmuPB008949;BmuPB016337;BmuPB018918;BmuPB007815;BmuPB013658;BmuPB016710;
		GO:0006468	688	48	22.8038	2.10492	8.37e-06	0.000583808	biological_process:protein phosphorylation	BmuPB006324;BmuPB007706;BmuPB009568;BmuPB012793;BmuPB012571;BmuPB011517;BmuPB018778;BmuPB003659;BmuPB011695;BmuPB020683;BmuPB015849;BmuPB008816;BmuPB012384;BmuPB006518;BmuPB019724;BmuPB002658;BmuPB013402;BmuPB008842;BmuPB006831;BmuPB010283;BmuPB018165;BmuPB020197;BmuPB012109;BmuPB020099;BmuPB007441;BmuPB004895;BmuPB011026;BmuPB000588;BmuPB004837;BmuPB020081;BmuPB005852;BmuPB004688;BmuPB017523;Bmu…
		GO:0004713	415	34	13.7552	2.4718	1.08651e-05	0.000673633	molecular_function:protein tyrosine kinase activity	BmuPB006324;BmuPB020081;BmuPB005852;BmuPB009568;BmuPB004688;BmuPB012793;BmuPB012571;BmuPB011517;BmuPB018778;BmuPB017523;BmuPB003659;BmuPB011695;BmuPB007131;BmuPB015849;BmuPB008816;BmuPB019273;BmuPB006518;BmuPB002658;BmuPB015778;BmuPB013402;BmuPB008842;BmuPB017541;BmuPB003164;BmuPB010283;BmuPB018165;BmuPB020197;BmuPB012109;BmuPB020099;BmuPB007441;BmuPB004895;BmuPB011026;BmuPB000067;BmuPB017011;Bmu…
		GO:0005230	47	10	1.55781	6.41925	1.31905e-05	0.000736029	molecular_function:extracellular ligand-gated ion channel activity	BmuPB005115;BmuPB009576;BmuPB012761;BmuPB005113;BmuPB006682;BmuPB005114;BmuPB018420;BmuPB010875;BmuPB019463;BmuPB005116;
		GO:0051260	48	10	1.59096	6.28551	1.54741e-05	0.000784958	biological_process:protein homooligomerization	BmuPB015859;BmuPB016628;BmuPB011090;BmuPB003952;BmuPB005408;BmuPB003929;BmuPB009305;BmuPB006471;BmuPB003930;BmuPB005233;
		GO:0004890	86	13	2.85047	4.56065	1.9238e-05	0.000894566	molecular_function:GABA-A receptor activity	BmuPB005115;BmuPB009576;BmuPB016337;BmuPB012761;BmuPB005113;BmuPB005114;BmuPB010875;BmuPB005116;BmuPB003008;BmuPB006682;BmuPB011011;BmuPB006956;BmuPB013471;
		GO:0070588	351	29	11.6339	2.49272	2.79838e-05	0.00120115	biological_process:calcium ion transmembrane transport	BmuPB007695;BmuPB018074;BmuPB011034;BmuPB020506;BmuPB014422;BmuPB004453;BmuPB003297;BmuPB004100;BmuPB007091;BmuPB001050;BmuPB019903;BmuPB000358;BmuPB008025;BmuPB018887;BmuPB010181;BmuPB016408;BmuPB013505;BmuPB016354;BmuPB000408;BmuPB013427;BmuPB016474;BmuPB002033;BmuPB011092;BmuPB000930;BmuPB007298;BmuPB018195;BmuPB005204;BmuPB005333;BmuPB015522;
		GO:0004672	503	37	16.6719	2.2193	3.92909e-05	0.00156602	molecular_function:protein kinase activity	BmuPB006324;BmuPB020081;BmuPB005852;BmuPB009568;BmuPB004688;BmuPB012793;BmuPB012571;BmuPB011517;BmuPB018778;BmuPB017523;BmuPB003659;BmuPB011695;BmuPB007131;BmuPB015849;BmuPB008816;BmuPB019273;BmuPB007091;BmuPB006518;BmuPB002658;BmuPB015778;BmuPB013402;BmuPB008842;BmuPB006831;BmuPB017541;BmuPB003164;BmuPB016661;BmuPB010283;BmuPB018165;BmuPB020197;BmuPB012109;BmuPB020099;BmuPB007441;BmuPB004895;Bmu…
		GO:0035556	259	23	8.58455	2.67923	5.88569e-05	0.00218948	biological_process:intracellular signal transduction	BmuPB002562;BmuPB014029;BmuPB017472;BmuPB010554;BmuPB019275;BmuPB016394;BmuPB018175;BmuPB014916;BmuPB002658;BmuPB015778;BmuPB003565;BmuPB003164;BmuPB014151;BmuPB001906;BmuPB013016;BmuPB017783;BmuPB011011;BmuPB011720;BmuPB006675;BmuPB020197;BmuPB004895;BmuPB017011;BmuPB005333;
		GO:0005543	247	22	8.18681	2.68725	8.03368e-05	0.00280175	molecular_function:phospholipid binding	BmuPB004048;BmuPB015249;BmuPB000991;BmuPB001642;BmuPB002562;BmuPB006724;BmuPB011100;BmuPB006675;BmuPB010416;BmuPB009170;BmuPB005663;BmuPB008816;BmuPB018592;BmuPB003650;BmuPB016015;BmuPB021148;BmuPB009801;BmuPB005260;BmuPB017011;BmuPB004837;BmuPB019779;BmuPB014151;
		GO:0006874	3	3	0.099435	30.1705	0.000618494	0.0191733	biological_process:cellular calcium ion homeostasis	BmuPB014422;BmuPB016474;BmuPB001050;
		GO:0005219	3	3	0.099435	30.1705	0.000618494	0.0191733	molecular_function:ryanodine-sensitive calcium-release channel activity	BmuPB014422;BmuPB016474;BmuPB001050;
		GO:0007214	53	8	1.75669	4.55403	0.000747026	0.0219222	biological_process:gamma-aminobutyric acid signaling pathway	BmuPB005115;BmuPB009576;BmuPB012761;BmuPB003008;BmuPB005114;BmuPB010875;BmuPB006956;BmuPB013471;
		GO:0005245	312	23	10.3412	2.22411	0.000864315	0.0219222	molecular_function:voltage-gated calcium channel activity	BmuPB018074;BmuPB011034;BmuPB020506;BmuPB004453;BmuPB003297;BmuPB004100;BmuPB007091;BmuPB019903;BmuPB000358;BmuPB008025;BmuPB018887;BmuPB010181;BmuPB016408;BmuPB013505;BmuPB016354;BmuPB000408;BmuPB013427;BmuPB002033;BmuPB011092;BmuPB000930;BmuPB018195;BmuPB005204;BmuPB015522;
		GO:0005509	711	42	23.5661	1.78222	0.000821198	0.0219222	molecular_function:calcium ion binding	BmuPB020071;BmuPB012653;BmuPB008299;BmuPB003785;BmuPB017275;BmuPB010346;BmuPB001965;BmuPB005974;BmuPB003992;BmuPB017193;BmuPB014560;BmuPB013402;BmuPB014661;BmuPB004785;BmuPB011658;BmuPB019616;BmuPB015050;BmuPB015072;BmuPB006956;BmuPB013406;BmuPB009740;BmuPB013206;BmuPB014422;BmuPB019275;BmuPB018175;BmuPB001844;BmuPB000523;BmuPB017283;BmuPB018230;BmuPB018887;BmuPB015439;BmuPB005781;BmuPB016474;Bmu…
		GO:0000976	185	16	6.13182	2.60934	0.000918548	0.0222848	molecular_function:transcription regulatory region sequence-specific DNA binding	BmuPB017769;BmuPB016371;BmuPB004225;BmuPB003343;BmuPB011303;BmuPB003341;BmuPB004937;BmuPB016373;BmuPB010626;BmuPB000066;BmuPB003342;BmuPB010704;BmuPB003344;BmuPB017771;BmuPB003805;BmuPB016372;
		GO:0051056	45	7	1.49152	4.69318	0.00135001	0.0313878	biological_process:regulation of small GTPase mediated signal transduction	BmuPB012408;BmuPB015249;BmuPB018175;BmuPB001642;BmuPB003008;BmuPB019942;BmuPB016394;
		GO:0007264	227	18	7.52391	2.39237	0.00145119	0.0323906	biological_process:small GTPase mediated signal transduction	BmuPB012784;BmuPB014315;BmuPB009496;BmuPB001642;BmuPB006961;BmuPB009568;BmuPB009689;BmuPB007485;BmuPB019942;BmuPB016394;BmuPB009884;BmuPB012408;BmuPB018175;BmuPB002508;BmuPB017529;BmuPB017102;BmuPB003269;BmuPB014151;
		GO:0043565	603	36	19.9864	1.80122	0.00151369	0.032486	molecular_function:sequence-specific DNA binding	BmuPB008824;BmuPB007354;BmuPB011303;BmuPB002269;BmuPB014524;BmuPB000066;BmuPB014705;BmuPB007860;BmuPB013001;BmuPB017193;BmuPB017771;BmuPB003805;BmuPB002067;BmuPB005910;BmuPB017769;BmuPB016426;BmuPB004937;BmuPB015050;BmuPB005811;BmuPB003931;BmuPB010518;BmuPB004225;BmuPB003343;BmuPB004703;BmuPB003341;BmuPB016373;BmuPB006491;BmuPB010626;BmuPB003344;BmuPB016372;BmuPB016371;BmuPB010584;BmuPB003342;Bmu…
		GO:0005262	91	10	3.01619	3.31544	0.0016144	0.0333642	molecular_function:calcium channel activity	BmuPB007298;BmuPB007695;BmuPB009927;BmuPB001050;BmuPB020897;BmuPB010664;BmuPB014422;BmuPB016474;BmuPB016394;BmuPB005333;
		GO:0004674	211	17	6.99359	2.4308	0.00184707	0.0368095	molecular_function:protein serine/threonine kinase activity	BmuPB015239;BmuPB015518;BmuPB007706;BmuPB011517;BmuPB020683;BmuPB020197;BmuPB009170;BmuPB008816;BmuPB012384;BmuPB004895;BmuPB019724;BmuPB015778;BmuPB000588;BmuPB017011;BmuPB002712;BmuPB004837;BmuPB005740;
	KEGG	map05033	40	20	1.3258	15.0852	2.05221e-15	5.58201e-13	Nicotine_addiction	BmuPB018887;BmuPB005115;BmuPB017472;BmuPB016661;BmuPB009576;BmuPB018918;BmuPB010181;BmuPB012761;BmuPB005113;BmuPB007815;BmuPB016710;BmuPB006682;BmuPB005114;BmuPB018420;BmuPB017195;BmuPB010875;BmuPB012088;BmuPB008949;BmuPB005116;BmuPB013658;
		map04724	121	25	4.01054	6.23357	1.30509e-11	1.77493e-09	Glutamatergic_synapse	BmuPB020197;BmuPB016661;BmuPB015239;BmuPB000368;BmuPB016337;BmuPB010181;BmuPB017847;BmuPB007695;BmuPB016710;BmuPB017195;BmuPB006885;BmuPB013658;BmuPB018122;BmuPB013505;BmuPB017472;BmuPB013424;BmuPB014996;BmuPB002405;BmuPB018918;BmuPB007815;BmuPB011011;BmuPB007411;BmuPB011727;BmuPB012088;BmuPB008949;
		map04080	293	37	9.71148	3.80992	1.14712e-10	1.04005e-08	Neuroactive_ligandreceptor_interaction	BmuPB005115;BmuPB009576;BmuPB010875;BmuPB007913;BmuPB010881;BmuPB000643;BmuPB017472;BmuPB001831;BmuPB020896;BmuPB011727;BmuPB011845;BmuPB012761;BmuPB020670;BmuPB005116;BmuPB011301;BmuPB018918;BmuPB007411;BmuPB016539;BmuPB014032;BmuPB012088;BmuPB006920;BmuPB014738;BmuPB015239;BmuPB000695;BmuPB005113;BmuPB016710;BmuPB013658;BmuPB004075;BmuPB006682;BmuPB018420;BmuPB019463;BmuPB016337;BmuPB005114;Bmu…
		map04713	102	20	3.38079	5.91578	2.91152e-09	1.58387e-07	Circadian_entrainment	BmuPB020197;BmuPB000368;BmuPB013016;BmuPB007695;BmuPB016710;BmuPB001050;BmuPB013658;BmuPB011026;BmuPB013505;BmuPB017472;BmuPB013424;BmuPB018918;BmuPB007815;BmuPB014422;BmuPB011011;BmuPB016474;BmuPB003269;BmuPB012088;BmuPB008949;BmuPB003297;
		map04723	152	24	5.03804	4.76376	3.86182e-09	1.75069e-07	Retrograde_endocannabinoid_signaling	BmuPB018887;BmuPB005115;BmuPB016661;BmuPB009576;BmuPB010181;BmuPB007695;BmuPB005113;BmuPB010875;BmuPB010881;BmuPB019647;BmuPB013505;BmuPB017472;BmuPB011011;BmuPB006682;BmuPB020197;BmuPB000368;BmuPB012761;BmuPB005114;BmuPB017195;BmuPB005116;BmuPB013424;BmuPB004101;BmuPB007411;BmuPB008949;
		map04721	68	16	2.25386	7.09893	1.15033e-08	4.46986e-07	Synaptic_vesicle_cycle	BmuPB018887;BmuPB009170;BmuPB016661;BmuPB010181;BmuPB021224;BmuPB019270;BmuPB017195;BmuPB014916;BmuPB019366;BmuPB009190;BmuPB016049;BmuPB004101;BmuPB010554;BmuPB008766;BmuPB009318;BmuPB004489;
		map05032	94	18	3.11563	5.77733	2.38707e-08	8.11604e-07	Morphine_addiction	BmuPB018887;BmuPB020197;BmuPB005115;BmuPB009576;BmuPB000368;BmuPB010181;BmuPB012708;BmuPB012761;BmuPB005113;BmuPB005114;BmuPB010875;BmuPB010693;BmuPB005116;BmuPB013424;BmuPB002077;BmuPB011517;BmuPB006682;BmuPB011011;
		map04727	90	17	2.98305	5.69887	6.8356e-08	2.06587e-06	GABAergic_synapse	BmuPB018887;BmuPB020197;BmuPB005115;BmuPB000930;BmuPB009576;BmuPB010181;BmuPB012761;BmuPB005113;BmuPB005114;BmuPB010875;BmuPB005116;BmuPB016408;BmuPB013505;BmuPB013424;BmuPB002077;BmuPB006682;BmuPB011011;
		map04024	246	28	8.15367	3.43404	1.26431e-07	3.43892e-06	cAMP_signaling_pathway	BmuPB014738;BmuPB016710;BmuPB005901;BmuPB013658;BmuPB016356;BmuPB013505;BmuPB020909;BmuPB017472;BmuPB001831;BmuPB010283;BmuPB004075;BmuPB014422;BmuPB011011;BmuPB016394;BmuPB009436;BmuPB001050;BmuPB018678;BmuPB011026;BmuPB021148;BmuPB018918;BmuPB002077;BmuPB010664;BmuPB007815;BmuPB008449;BmuPB016539;BmuPB014032;BmuPB012088;BmuPB008949;
		map04020	238	27	7.88851	3.4227	2.20609e-07	5.45505e-06	Calcium_signaling_pathway	BmuPB018887;BmuPB014738;BmuPB016739;BmuPB010181;BmuPB007695;BmuPB016710;BmuPB006885;BmuPB010693;BmuPB013658;BmuPB013505;BmuPB020909;BmuPB014422;BmuPB011011;BmuPB016474;BmuPB007294;BmuPB003297;BmuPB020197;BmuPB015849;BmuPB011166;BmuPB001050;BmuPB011026;BmuPB011301;BmuPB018918;BmuPB010664;BmuPB007411;BmuPB014032;BmuPB012088;
		map04720	64	13	2.12128	6.12838	1.11247e-06	2.52159e-05	Longterm_potentiation	BmuPB020197;BmuPB007695;BmuPB016710;BmuPB006885;BmuPB013658;BmuPB011026;BmuPB013505;BmuPB018918;BmuPB007815;BmuPB011011;BmuPB007411;BmuPB012088;BmuPB008949;
		map04921	158	20	5.23691	3.81905	1.64782e-06	3.44775e-05	Oxytocin_signaling_pathway	BmuPB003283;BmuPB007695;BmuPB006885;BmuPB013505;BmuPB011777;BmuPB014422;BmuPB011011;BmuPB016474;BmuPB014700;BmuPB016563;BmuPB020683;BmuPB020197;BmuPB000368;BmuPB001050;BmuPB018122;BmuPB011026;BmuPB000358;BmuPB008842;BmuPB004390;BmuPB010609;
		map04742	81	14	2.68474	5.21465	2.37099e-06	4.6065e-05	Taste_transduction	BmuPB005115;BmuPB015239;BmuPB009576;BmuPB010181;BmuPB012761;BmuPB005114;BmuPB009436;BmuPB010693;BmuPB013505;BmuPB013424;BmuPB002077;BmuPB004075;BmuPB000404;BmuPB007411;
		map04725	113	15	3.74538	4.00493	1.85182e-05	0.000335798	Cholinergic_synapse	BmuPB018887;BmuPB020197;BmuPB003283;BmuPB000368;BmuPB010181;BmuPB007695;BmuPB005901;BmuPB000668;BmuPB011026;BmuPB013505;BmuPB013424;BmuPB011011;BmuPB008766;BmuPB018420;BmuPB014032;
		map04730	63	11	2.08813	5.26786	2.5382e-05	0.000431495	Longterm_depression	BmuPB006920;BmuPB020197;BmuPB000978;BmuPB011845;BmuPB010181;BmuPB007695;BmuPB007411;BmuPB008949;BmuPB015504;BmuPB018122;BmuPB018863;
		map05031	65	11	2.15442	5.10577	3.27681e-05	0.000524289	Amphetamine_addiction	BmuPB020197;BmuPB016710;BmuPB006885;BmuPB013658;BmuPB011026;BmuPB013505;BmuPB017472;BmuPB018918;BmuPB007815;BmuPB012088;BmuPB008949;
		map05030	47	9	1.55781	5.77732	7.24857e-05	0.00109534	Cocaine_addiction	BmuPB018918;BmuPB002899;BmuPB007815;BmuPB016710;BmuPB008449;BmuPB011727;BmuPB012088;BmuPB008949;BmuPB013658;
		map04728	133	15	4.40828	3.40268	0.000100189	0.00141434	Dopaminergic_synapse	BmuPB018887;BmuPB014738;BmuPB010181;BmuPB007695;BmuPB006885;BmuPB013658;BmuPB013505;BmuPB017472;BmuPB000978;BmuPB020197;BmuPB000368;BmuPB011026;BmuPB013424;BmuPB007815;BmuPB008949;
		map05412	75	11	2.48587	4.425	0.000103996	0.00141434	Arrhythmogenic_right_ventricular_cardiomyopathy_ARVC	BmuPB016563;BmuPB020683;BmuPB019234;BmuPB015314;BmuPB001050;BmuPB003313;BmuPB013505;BmuPB011777;BmuPB000358;BmuPB014422;BmuPB004390;
		map04261	152	16	5.03804	3.17584	0.000125313	0.0016231	Adrenergic_signaling_in_cardiomyocytes	BmuPB013505;BmuPB020909;BmuPB011777;BmuPB000978;BmuPB014422;BmuPB011011;BmuPB001140;BmuPB016394;BmuPB016563;BmuPB020683;BmuPB001050;BmuPB011026;BmuPB010664;BmuPB000358;BmuPB004390;BmuPB005333;
		map04360	175	17	5.80037	2.93085	0.000190466	0.00235485	Axon_guidance	BmuPB006885;BmuPB005901;BmuPB008411;BmuPB018409;BmuPB020897;BmuPB010283;BmuPB018778;BmuPB003881;BmuPB014700;BmuPB018165;BmuPB019273;BmuPB017102;BmuPB010680;BmuPB008412;BmuPB011026;BmuPB000067;BmuPB009943;
		map04911	82	11	2.71789	4.04726	0.000210613	0.00249073	Insulin_secretion	BmuPB008690;BmuPB020197;BmuPB019270;BmuPB008410;BmuPB001050;BmuPB005412;BmuPB011026;BmuPB013505;BmuPB011011;BmuPB014422;BmuPB016394;
		map04014	280	22	9.2806	2.37054	0.000448402	0.00498503	Ras_signaling_pathway	BmuPB005901;BmuPB010659;BmuPB012793;BmuPB007131;BmuPB018175;BmuPB019273;BmuPB018122;BmuPB018918;BmuPB015249;BmuPB001642;BmuPB012946;BmuPB013658;BmuPB018409;BmuPB010283;BmuPB018165;BmuPB013454;BmuPB020197;BmuPB011166;BmuPB013424;BmuPB021148;BmuPB007815;BmuPB008449;
		map04010	310	24	10.2749	2.33578	0.000458183	0.00498503	MAPK_signaling_pathway	BmuPB015297;BmuPB006885;BmuPB010659;BmuPB012793;BmuPB011777;BmuPB003297;BmuPB016563;BmuPB020683;BmuPB018175;BmuPB018122;BmuPB000358;BmuPB018887;BmuPB010181;BmuPB001642;BmuPB005568;BmuPB012946;BmuPB018409;BmuPB013505;BmuPB010283;BmuPB016303;BmuPB013454;BmuPB020197;BmuPB008449;BmuPB004390;
		map04726	126	13	4.17627	3.11283	0.000609017	0.00613528	Serotonergic_synapse	BmuPB003167;BmuPB018887;BmuPB020197;BmuPB000368;BmuPB010181;BmuPB007695;BmuPB005116;BmuPB018122;BmuPB013505;BmuPB013424;BmuPB011090;BmuPB011301;BmuPB004075;
		map05014	51	8	1.6904	4.73262	0.000595602	0.00613528	Amyotrophic_lateral_sclerosis_ALS	BmuPB018918;BmuPB007815;BmuPB016710;BmuPB006885;BmuPB012088;BmuPB008949;BmuPB010819;BmuPB013658;
		map04925	95	11	3.14877	3.49342	0.000654306	0.00635611	Aldosterone_synthesis_and_secretion	BmuPB020197;BmuPB007695;BmuPB003727;BmuPB011026;BmuPB013505;BmuPB020909;BmuPB015778;BmuPB010664;BmuPB011011;BmuPB003297;BmuPB010609;
		map04072	162	15	5.36949	2.79356	0.000690457	0.00647601	Phospholipase_D_signaling_pathway	BmuPB015239;BmuPB002562;BmuPB002214;BmuPB005901;BmuPB014029;BmuPB010659;BmuPB012793;BmuPB011011;BmuPB016394;BmuPB020896;BmuPB011727;BmuPB009170;BmuPB015849;BmuPB018122;BmuPB007411;
		map05414	107	11	3.54651	3.10164	0.00158281	0.014165	Dilated_cardiomyopathy_DCM	BmuPB016563;BmuPB020683;BmuPB019234;BmuPB001050;BmuPB003313;BmuPB013505;BmuPB011777;BmuPB000358;BmuPB011011;BmuPB014422;BmuPB004390;
		map05410	91	10	3.01619	3.31544	0.0016144	0.014165	Hypertrophic_cardiomyopathy_HCM	BmuPB016563;BmuPB020683;BmuPB019234;BmuPB001050;BmuPB003313;BmuPB013505;BmuPB011777;BmuPB000358;BmuPB014422;BmuPB004390;
		map04930	48	7	1.59096	4.39986	0.00188259	0.016002	Type_II_diabetes_mellitus	BmuPB018887;BmuPB013505;BmuPB010181;BmuPB015778;BmuPB005901;BmuPB003297;BmuPB005412;
		map04070	101	10	3.34764	2.98718	0.00324026	0.0267076	Phosphatidylinositol_signaling_system	BmuPB020197;BmuPB007695;BmuPB002562;BmuPB002214;BmuPB005901;BmuPB007135;BmuPB014029;BmuPB018745;BmuPB016157;BmuPB017812;
hypothalamus vs brain	GO	GO:0005216	256	28	5.51248	5.07938	4.25898e-11	1.89099e-08	molecular_function:ion channel activity	BmuPB005115;BmuPB018123;BmuPB005176;BmuPB001437;BmuPB010775;BmuPB003781;BmuPB010814;BmuPB010641;BmuPB005116;BmuPB001050;BmuPB004889;BmuPB003929;BmuPB010347;BmuPB020593;BmuPB002646;BmuPB010181;BmuPB007092;BmuPB000408;BmuPB011090;BmuPB016525;BmuPB019330;BmuPB013808;BmuPB011771;BmuPB016580;BmuPB014699;BmuPB016052;BmuPB005233;BmuPB015578;
		GO:0006811	380	31	8.18259	3.78853	3.12504e-09	6.93758e-07	biological_process:ion transport	BmuPB005115;BmuPB015848;BmuPB010875;BmuPB018123;BmuPB005176;BmuPB001437;BmuPB010775;BmuPB003781;BmuPB010814;BmuPB010641;BmuPB005116;BmuPB001050;BmuPB004889;BmuPB003929;BmuPB010347;BmuPB020593;BmuPB002646;BmuPB010181;BmuPB007092;BmuPB000408;BmuPB011090;BmuPB016525;BmuPB019330;BmuPB013808;BmuPB011771;BmuPB016580;BmuPB014699;BmuPB016052;BmuPB005114;BmuPB005233;BmuPB015578;
		GO:0055085	419	28	9.02238	3.10339	7.32244e-07	0.000108372	biological_process:transmembrane transport	BmuPB018597;BmuPB000841;BmuPB005176;BmuPB010775;BmuPB003781;BmuPB010814;BmuPB003709;BmuPB010641;BmuPB001050;BmuPB004889;BmuPB003929;BmuPB010347;BmuPB020593;BmuPB002646;BmuPB002297;BmuPB010181;BmuPB007092;BmuPB000408;BmuPB011090;BmuPB019330;BmuPB007294;BmuPB013808;BmuPB011771;BmuPB014699;BmuPB017195;BmuPB001442;BmuPB005233;BmuPB015578;
		GO:0005515	4194	144	90.3099	1.59451	3.19969e-06	0.000355165	molecular_function:protein binding	BmuPB020416;BmuPB012571;BmuPB011100;BmuPB016217;BmuPB014765;BmuPB007588;BmuPB016750;BmuPB004837;BmuPB003347;BmuPB009701;BmuPB007462;BmuPB012835;BmuPB001752;BmuPB002461;BmuPB017340;BmuPB003593;BmuPB008410;BmuPB005233;BmuPB003730;BmuPB003167;BmuPB000252;BmuPB007706;BmuPB010346;BmuPB018164;BmuPB015942;BmuPB006831;BmuPB002959;BmuPB013427;BmuPB009931;BmuPB008952;BmuPB003760;BmuPB006963;BmuPB017575;Bmu…
		GO:0043565	603	33	12.9845	2.5415	5.68101e-06	0.000504474	molecular_function:sequence-specific DNA binding	BmuPB011527;BmuPB011303;BmuPB002269;BmuPB001778;BmuPB000066;BmuPB014705;BmuPB007860;BmuPB013001;BmuPB010521;BmuPB009550;BmuPB008075;BmuPB003805;BmuPB007227;BmuPB009102;BmuPB016426;BmuPB009217;BmuPB004937;BmuPB009200;BmuPB018246;BmuPB018247;BmuPB018774;BmuPB010518;BmuPB004225;BmuPB015536;BmuPB004703;BmuPB017312;BmuPB010626;BmuPB001224;BmuPB009271;BmuPB016398;BmuPB010714;BmuPB007952;BmuPB017686;
		GO:0051260	48	8	1.03359	7.74001	2.37661e-05	0.00175869	biological_process:protein homooligomerization	BmuPB014699;BmuPB011090;BmuPB002579;BmuPB005176;BmuPB003781;BmuPB003929;BmuPB019330;BmuPB005233;
		GO:0003700	986	44	21.2317	2.07238	2.8818e-05	0.00182788	molecular_function:transcription factor activity, sequence-specific DNA binding	BmuPB000697;BmuPB011527;BmuPB015601;BmuPB000856;BmuPB011303;BmuPB012813;BmuPB002269;BmuPB001778;BmuPB000066;BmuPB014705;BmuPB007860;BmuPB013001;BmuPB010521;BmuPB001444;BmuPB008412;BmuPB009550;BmuPB008075;BmuPB003805;BmuPB007227;BmuPB009102;BmuPB016426;BmuPB013319;BmuPB001402;BmuPB009217;BmuPB004937;BmuPB009200;BmuPB018246;BmuPB018049;BmuPB018247;BmuPB018774;BmuPB010518;BmuPB000390;BmuPB004225;Bmu…
		GO:0005509	711	34	15.3101	2.22076	5.77188e-05	0.0032034	molecular_function:calcium ion binding	BmuPB013625;BmuPB014418;BmuPB006134;BmuPB008299;BmuPB017275;BmuPB010346;BmuPB003992;BmuPB005561;BmuPB006133;BmuPB010557;BmuPB014560;BmuPB013402;BmuPB006864;BmuPB015435;BmuPB002175;BmuPB004785;BmuPB007256;BmuPB019036;BmuPB013258;BmuPB020681;BmuPB006428;BmuPB009740;BmuPB018123;BmuPB019275;BmuPB006954;BmuPB013627;BmuPB017283;BmuPB018230;BmuPB005781;BmuPB002590;BmuPB012897;BmuPB001206;BmuPB001442;Bmu…
		GO:0016907	11	4	0.236864	16.8873	0.000227797	0.011238	molecular_function:G-protein coupled acetylcholine receptor activity	BmuPB008540;BmuPB014032;BmuPB014426;BmuPB016951;
		GO:0000976	185	13	3.98363	3.26336	0.000369601	0.0164103	molecular_function:transcription regulatory region sequence-specific DNA binding	BmuPB009102;BmuPB011527;BmuPB004225;BmuPB016398;BmuPB011303;BmuPB009217;BmuPB004937;BmuPB009200;BmuPB010626;BmuPB000066;BmuPB018774;BmuPB003805;BmuPB007227;
		GO:0000155	6	3	0.129199	23.22	0.000723361	0.0291975	molecular_function:phosphorelay sensor kinase activity	BmuPB020593;BmuPB010814;BmuPB004889;
		GO:0001558	19	4	0.409129	9.77687	0.00129	0.0470054	biological_process:regulation of cell growth	BmuPB005157;BmuPB000422;BmuPB003415;BmuPB010734;
		GO:0000160	8	3	0.172265	17.415	0.00137628	0.0470054	biological_process:phosphorelay signal transduction system	BmuPB020593;BmuPB010814;BmuPB004889;
	KEGG	map04080	293	25	6.30921	3.96246	4.11125e-08	9.53809e-06	Neuroactive_ligandreceptor_interaction	BmuPB005115;BmuPB015848;BmuPB002595;BmuPB010875;BmuPB020044;BmuPB006500;BmuPB017472;BmuPB020896;BmuPB013623;BmuPB005116;BmuPB009321;BmuPB007411;BmuPB014032;BmuPB012596;BmuPB012088;BmuPB006920;BmuPB014738;BmuPB015239;BmuPB008540;BmuPB004075;BmuPB014426;BmuPB005114;BmuPB016951;BmuPB008952;BmuPB009585;
		map04020	238	19	5.12488	3.7074	3.76466e-06	0.000291133	Calcium_signaling_pathway	BmuPB014738;BmuPB010181;BmuPB002595;BmuPB003044;BmuPB020044;BmuPB006500;BmuPB007294;BmuPB013808;BmuPB011771;BmuPB014426;BmuPB018133;BmuPB011166;BmuPB016951;BmuPB010641;BmuPB001050;BmuPB009321;BmuPB007411;BmuPB014032;BmuPB012088;
		map05033	40	8	0.861325	9.28802	7.35041e-06	0.000426324	Nicotine_addiction	BmuPB005115;BmuPB017472;BmuPB010181;BmuPB005114;BmuPB017195;BmuPB010875;BmuPB012088;BmuPB005116;
		map05412	75	9	1.61498	5.57281	7.75116e-05	0.00256896	Arrhythmogenic_right_ventricular_cardiomyopathy_ARVC	BmuPB015314;BmuPB014418;BmuPB010641;BmuPB001050;BmuPB003313;BmuPB004390;BmuPB011771;BmuPB020195;BmuPB021263;
		map04725	113	11	2.43324	4.52072	7.54892e-05	0.00256896	Cholinergic_synapse	BmuPB003283;BmuPB014426;BmuPB000368;BmuPB010181;BmuPB016951;BmuPB010641;BmuPB008540;BmuPB013540;BmuPB004614;BmuPB014032;BmuPB011771;
		map04360	175	14	3.7683	3.71521	6.37519e-05	0.00256896	Axon_guidance	BmuPB005701;BmuPB008411;BmuPB015383;BmuPB003881;BmuPB015530;BmuPB012472;BmuPB018165;BmuPB006954;BmuPB011168;BmuPB017102;BmuPB006133;BmuPB008412;BmuPB010347;BmuPB002646;
		map04934	162	13	3.48837	3.72667	0.0001107	0.00321031	Cushing_s_syndrome	BmuPB000928;BmuPB015314;BmuPB005343;BmuPB010570;BmuPB021179;BmuPB015202;BmuPB012472;BmuPB013808;BmuPB015504;BmuPB011771;BmuPB021263;BmuPB008906;BmuPB010641;
		map04724	121	11	2.60551	4.22182	0.000132167	0.00340697	Glutamatergic_synapse	BmuPB015239;BmuPB000368;BmuPB010181;BmuPB018581;BmuPB017195;BmuPB018122;BmuPB017472;BmuPB015055;BmuPB007411;BmuPB012088;BmuPB011771;
		map04726	126	11	2.71317	4.05429	0.000183401	0.00425489	Serotonergic_synapse	BmuPB003167;BmuPB000368;BmuPB010181;BmuPB002595;BmuPB010641;BmuPB005116;BmuPB018122;BmuPB011090;BmuPB004075;BmuPB009585;BmuPB011771;
		map04723	152	12	3.27304	3.66632	0.000228745	0.00482445	Retrograde_endocannabinoid_signaling	BmuPB005115;BmuPB010181;BmuPB010875;BmuPB005909;BmuPB017472;BmuPB011771;BmuPB000368;BmuPB005114;BmuPB017195;BmuPB010641;BmuPB005116;BmuPB007411;
		map04742	81	8	1.74418	4.58667	0.000633692	0.0122514	Taste_transduction	BmuPB005115;BmuPB015239;BmuPB014426;BmuPB010181;BmuPB005114;BmuPB004075;BmuPB009585;BmuPB007411;
		map05217	63	7	1.35659	5.16001	0.000721714	0.0128798	Basal_cell_carcinoma	BmuPB000745;BmuPB000928;BmuPB008906;BmuPB015314;BmuPB015202;BmuPB012472;BmuPB021263;
		map05031	65	7	1.39965	5.00124	0.000854714	0.0141638	Amphetamine_addiction	BmuPB018605;BmuPB019888;BmuPB017472;BmuPB004560;BmuPB009321;BmuPB012088;BmuPB011771;
		map04727	90	8	1.93798	4.12801	0.00119281	0.0184488	GABAergic_synapse	BmuPB005115;BmuPB010181;BmuPB005114;BmuPB010875;BmuPB010641;BmuPB005116;BmuPB015055;BmuPB011771;
		map04024	246	14	5.29715	2.64293	0.0015588	0.0212731	cAMP_signaling_pathway	BmuPB014738;BmuPB006500;BmuPB016356;BmuPB017472;BmuPB004075;BmuPB011771;BmuPB016951;BmuPB010641;BmuPB001050;BmuPB021148;BmuPB009321;BmuPB009585;BmuPB014032;BmuPB012088;
		map05032	94	8	2.02411	3.95235	0.00154243	0.0212731	Morphine_addiction	BmuPB005115;BmuPB000368;BmuPB010181;BmuPB005114;BmuPB010875;BmuPB015942;BmuPB005116;BmuPB009321;
		map04916	98	8	2.11025	3.79103	0.00196853	0.0253722	Melanogenesis	BmuPB000928;BmuPB008906;BmuPB015314;BmuPB002269;BmuPB010659;BmuPB012793;BmuPB012472;BmuPB021263;
		map04730	63	6	1.35659	4.42286	0.00347867	0.0403525	Longterm_depression	BmuPB006920;BmuPB010181;BmuPB007411;BmuPB015504;BmuPB018122;BmuPB018863;
		map04921	158	10	3.40223	2.93925	0.00337752	0.0403525	Oxytocin_signaling_pathway	BmuPB003283;BmuPB015202;BmuPB011771;BmuPB000368;BmuPB010641;BmuPB001050;BmuPB018122;BmuPB004390;BmuPB013540;BmuPB020195;
cerebellum vs brainstem	GO	GO:0005515	4194	483	315.338	1.53169	3.14499e-14	1.49895e-11	molecular_function:protein binding	BmuPB020071;BmuPB017753;BmuPB018163;BmuPB005618;BmuPB020416;BmuPB013165;BmuPB018964;BmuPB011100;BmuPB021123;BmuPB005056;BmuPB013071;BmuPB016217;BmuPB018061;BmuPB007784;BmuPB007588;BmuPB016750;BmuPB019868;BmuPB005947;BmuPB015861;BmuPB019060;BmuPB018842;BmuPB015050;BmuPB020197;BmuPB001804;BmuPB006823;BmuPB005383;BmuPB004837;BmuPB018748;BmuPB007462;BmuPB014469;BmuPB014444;BmuPB002803;BmuPB008527;Bmu…
		GO:0006811	380	69	28.5714	2.415	1.49394e-09	4.06948e-07	biological_process:ion transport	BmuPB005115;BmuPB015848;BmuPB007695;BmuPB007096;BmuPB010875;BmuPB006542;BmuPB000666;BmuPB014422;BmuPB009787;BmuPB003297;BmuPB008925;BmuPB010775;BmuPB006192;BmuPB008041;BmuPB012761;BmuPB003781;BmuPB000412;BmuPB000237;BmuPB013563;BmuPB005116;BmuPB014400;BmuPB005868;BmuPB012762;BmuPB020516;BmuPB009521;BmuPB003929;BmuPB010347;BmuPB006294;BmuPB018887;BmuPB009383;BmuPB013455;BmuPB018599;BmuPB010181;Bmu…
		GO:0005543	247	52	18.5714	2.8	1.99663e-09	4.06948e-07	molecular_function:phospholipid binding	BmuPB016985;BmuPB020108;BmuPB004048;BmuPB015249;BmuPB016099;BmuPB000991;BmuPB001642;BmuPB014606;BmuPB006457;BmuPB000227;BmuPB009275;BmuPB006665;BmuPB018964;BmuPB006724;BmuPB011100;BmuPB018842;BmuPB006675;BmuPB017096;BmuPB004158;BmuPB007468;BmuPB015324;BmuPB015194;BmuPB010416;BmuPB009170;BmuPB010299;BmuPB009995;BmuPB003368;BmuPB005663;BmuPB011389;BmuPB008816;BmuPB004855;BmuPB007187;BmuPB020769;Bmu…
		GO:0005216	256	52	19.2481	2.70156	7.88876e-09	8.43111e-07	molecular_function:ion channel activity	BmuPB005115;BmuPB007695;BmuPB014422;BmuPB003297;BmuPB008925;BmuPB010775;BmuPB006192;BmuPB008041;BmuPB003781;BmuPB000412;BmuPB000237;BmuPB013563;BmuPB005116;BmuPB020516;BmuPB009521;BmuPB003929;BmuPB010347;BmuPB006294;BmuPB018887;BmuPB013455;BmuPB018599;BmuPB010181;BmuPB005113;BmuPB007092;BmuPB009750;BmuPB014810;BmuPB000668;BmuPB010598;BmuPB000551;BmuPB000408;BmuPB011090;BmuPB003952;BmuPB005408;Bmu…
		GO:0005509	711	103	53.4586	1.92672	1.63291e-08	1.55127e-06	molecular_function:calcium ion binding	BmuPB015397;BmuPB020071;BmuPB007052;BmuPB012653;BmuPB018163;BmuPB009115;BmuPB003785;BmuPB017275;BmuPB012898;BmuPB010346;BmuPB018270;BmuPB005084;BmuPB001965;BmuPB005974;BmuPB003992;BmuPB012687;BmuPB003660;BmuPB017596;BmuPB007156;BmuPB019910;BmuPB014560;BmuPB013402;BmuPB001374;BmuPB014661;BmuPB006449;BmuPB018968;BmuPB000227;BmuPB011658;BmuPB017169;BmuPB019111;BmuPB018116;BmuPB019616;BmuPB007256;Bmu…
		GO:0055085	419	67	31.5038	2.12673	2.49489e-07	1.93921e-05	biological_process:transmembrane transport	BmuPB004324;BmuPB007695;BmuPB020987;BmuPB008793;BmuPB014422;BmuPB003297;BmuPB003996;BmuPB017537;BmuPB010775;BmuPB008041;BmuPB003104;BmuPB003781;BmuPB000412;BmuPB013563;BmuPB020516;BmuPB012373;BmuPB008766;BmuPB003929;BmuPB010347;BmuPB006081;BmuPB002297;BmuPB007171;BmuPB018887;BmuPB013455;BmuPB016661;BmuPB016739;BmuPB018599;BmuPB010181;BmuPB007092;BmuPB006190;BmuPB000668;BmuPB012197;BmuPB010598;Bmu…
		GO:0005085	44	14	3.30827	4.23182	3.68942e-05	0.00225318	molecular_function:guanyl-nucleotide exchange factor activity	BmuPB000050;BmuPB015062;BmuPB009689;BmuPB013400;BmuPB015861;BmuPB018175;BmuPB001642;BmuPB019942;BmuPB016394;BmuPB009092;BmuPB009690;BmuPB010056;BmuPB008440;BmuPB007257;
		GO:0004890	86	20	6.46617	3.09302	4.50875e-05	0.00241787	molecular_function:GABA-A receptor activity	BmuPB005115;BmuPB006192;BmuPB016337;BmuPB012761;BmuPB005113;BmuPB005114;BmuPB002539;BmuPB010875;BmuPB005116;BmuPB009750;BmuPB006542;BmuPB008414;BmuPB003008;BmuPB006682;BmuPB011011;BmuPB005331;BmuPB021181;BmuPB006956;BmuPB003310;BmuPB013471;
		GO:0051056	45	14	3.38346	4.13778	4.52467e-05	0.00241787	biological_process:regulation of small GTPase mediated signal transduction	BmuPB014981;BmuPB001062;BmuPB013400;BmuPB015249;BmuPB018175;BmuPB001642;BmuPB003008;BmuPB019942;BmuPB016394;BmuPB009092;BmuPB010056;BmuPB009275;BmuPB008440;BmuPB017047;
		GO:0007165	669	84	50.3008	1.66996	4.99314e-05	0.00251126	biological_process:signal transduction	BmuPB019514;BmuPB020895;BmuPB018163;BmuPB009799;BmuPB013165;BmuPB004056;BmuPB016394;BmuPB005280;BmuPB003215;BmuPB012735;BmuPB012687;BmuPB007784;BmuPB018623;BmuPB019910;BmuPB012784;BmuPB014315;BmuPB016750;BmuPB011909;BmuPB006457;BmuPB009092;BmuPB000227;BmuPB005989;BmuPB010283;BmuPB007485;BmuPB001891;BmuPB009884;BmuPB014527;BmuPB014897;BmuPB003368;BmuPB019905;BmuPB014852;BmuPB011937;BmuPB008952;Bmu…
		GO:0005230	47	14	3.53383	3.9617	6.70248e-05	0.00318368	molecular_function:extracellular ligand-gated ion channel activity	BmuPB005115;BmuPB006542;BmuPB015848;BmuPB000666;BmuPB012761;BmuPB005113;BmuPB006682;BmuPB005114;BmuPB018420;BmuPB009787;BmuPB021561;BmuPB010875;BmuPB005116;BmuPB012762;
		GO:0005089	68	16	5.11278	3.12941	0.000221505	0.00823419	molecular_function:Rho guanyl-nucleotide exchange factor activity	BmuPB009995;BmuPB016099;BmuPB001642;BmuPB010980;BmuPB006665;BmuPB007286;BmuPB021148;BmuPB012900;BmuPB004140;BmuPB018964;BmuPB005383;BmuPB014155;BmuPB009801;BmuPB015489;BmuPB007468;BmuPB015194;
		GO:0004970	17	8	1.27819	6.25883	0.000212481	0.00823419	molecular_function:ionotropic glutamate receptor activity	BmuPB006920;BmuPB017472;BmuPB012088;BmuPB008949;BmuPB006545;BmuPB016337;BmuPB018918;BmuPB013658;
		GO:0035023	68	16	5.11278	3.12941	0.000221505	0.00823419	biological_process:regulation of Rho protein signal transduction	BmuPB009995;BmuPB016099;BmuPB001642;BmuPB010980;BmuPB006665;BmuPB007286;BmuPB021148;BmuPB012900;BmuPB004140;BmuPB018964;BmuPB005383;BmuPB014155;BmuPB009801;BmuPB015489;BmuPB007468;BmuPB015194;
		GO:0005234	17	8	1.27819	6.25883	0.000212481	0.00823419	molecular_function:extracellular-glutamate-gated ion channel activity	BmuPB006920;BmuPB017472;BmuPB012088;BmuPB008949;BmuPB006545;BmuPB016337;BmuPB018918;BmuPB013658;
		GO:0006468	688	82	51.7293	1.58517	0.000259755	0.00925377	biological_process:protein phosphorylation	BmuPB006324;BmuPB017753;BmuPB007558;BmuPB001555;BmuPB017070;BmuPB007706;BmuPB012793;BmuPB013065;BmuPB018778;BmuPB001980;BmuPB003659;BmuPB020683;BmuPB012475;BmuPB016882;BmuPB008816;BmuPB008041;BmuPB005615;BmuPB012151;BmuPB006518;BmuPB019724;BmuPB002658;BmuPB013402;BmuPB008842;BmuPB006831;BmuPB014883;BmuPB003808;BmuPB008804;BmuPB015378;BmuPB014397;BmuPB010283;BmuPB014212;BmuPB001945;BmuPB018165;Bmu…
		GO:0007214	53	13	3.98496	3.26226	0.000594572	0.0203344	biological_process:gamma-aminobutyric acid signaling pathway	BmuPB005115;BmuPB006542;BmuPB012761;BmuPB008414;BmuPB003008;BmuPB005114;BmuPB005331;BmuPB002539;BmuPB021181;BmuPB010875;BmuPB006956;BmuPB013471;BmuPB003310;
		GO:0035556	259	37	19.4737	1.9	0.000800945	0.0263388	biological_process:intracellular signal transduction	BmuPB015062;BmuPB018163;BmuPB012190;BmuPB017472;BmuPB010554;BmuPB018964;BmuPB019530;BmuPB019275;BmuPB016394;BmuPB009754;BmuPB015489;BmuPB008538;BmuPB018175;BmuPB014916;BmuPB007257;BmuPB002658;BmuPB015778;BmuPB003565;BmuPB000107;BmuPB003164;BmuPB014151;BmuPB001906;BmuPB014892;BmuPB011909;BmuPB000227;BmuPB008804;BmuPB008473;BmuPB013907;BmuPB011011;BmuPB011720;BmuPB006675;BmuPB020197;BmuPB015785;Bmu…
		GO:0004222	182	28	13.6842	2.04615	0.00102476	0.0324509	molecular_function:metalloendopeptidase activity	BmuPB008915;BmuPB006691;BmuPB018968;BmuPB012668;BmuPB012190;BmuPB021214;BmuPB011818;BmuPB016354;BmuPB017275;BmuPB018248;BmuPB001532;BmuPB014457;BmuPB006323;BmuPB015734;BmuPB001375;BmuPB002034;BmuPB015045;BmuPB001683;BmuPB000730;BmuPB018146;BmuPB008231;BmuPB009601;BmuPB019110;BmuPB000500;BmuPB015512;BmuPB013036;BmuPB014221;BmuPB010705;
		GO:0004672	503	61	37.8195	1.61292	0.00112031	0.0342096	molecular_function:protein kinase activity	BmuPB006324;BmuPB017753;BmuPB007558;BmuPB001555;BmuPB017817;BmuPB005852;BmuPB017070;BmuPB004688;BmuPB012793;BmuPB001735;BmuPB018778;BmuPB017523;BmuPB005757;BmuPB019833;BmuPB001980;BmuPB003659;BmuPB012475;BmuPB006484;BmuPB008816;BmuPB004410;BmuPB008041;BmuPB010717;BmuPB005615;BmuPB019273;BmuPB019784;BmuPB010165;BmuPB007091;BmuPB006518;BmuPB006514;BmuPB013495;BmuPB002658;BmuPB015778;BmuPB013402;Bmu…
		GO:0006810	535	64	40.2256	1.59103	0.00118158	0.0348362	biological_process:transport	BmuPB020071;BmuPB015848;BmuPB016127;BmuPB010875;BmuPB000666;BmuPB014154;BmuPB009538;BmuPB018061;BmuPB012762;BmuPB010694;BmuPB018197;BmuPB012088;BmuPB001374;BmuPB019248;BmuPB013819;BmuPB006920;BmuPB008951;BmuPB005113;BmuPB017471;BmuPB000203;BmuPB018226;BmuPB013658;BmuPB006093;BmuPB005947;BmuPB006682;BmuPB009535;BmuPB019549;BmuPB003230;BmuPB005119;BmuPB014658;BmuPB005114;BmuPB010804;BmuPB015908;Bmu…
	KEGG	map05033	40	21	3.00752	6.9825	4.658e-10	7.42952e-08	Nicotine_addiction	BmuPB018887;BmuPB005115;BmuPB017472;BmuPB016661;BmuPB006545;BmuPB000666;BmuPB018918;BmuPB010181;BmuPB012761;BmuPB005113;BmuPB006682;BmuPB005114;BmuPB018420;BmuPB017195;BmuPB010875;BmuPB012088;BmuPB008949;BmuPB000451;BmuPB005116;BmuPB013658;BmuPB012762;
		map04724	121	35	9.09774	3.84711	8.18379e-10	8.7021e-08	Glutamatergic_synapse	BmuPB020197;BmuPB016615;BmuPB016661;BmuPB015239;BmuPB000368;BmuPB016337;BmuPB010181;BmuPB018163;BmuPB003109;BmuPB017847;BmuPB007695;BmuPB007910;BmuPB017195;BmuPB006885;BmuPB013658;BmuPB018122;BmuPB013816;BmuPB017472;BmuPB001395;BmuPB013424;BmuPB014996;BmuPB002405;BmuPB006545;BmuPB015055;BmuPB018578;BmuPB018918;BmuPB011011;BmuPB007411;BmuPB008494;BmuPB011727;BmuPB012088;BmuPB008949;BmuPB004158;Bmu…
		map04080	293	55	22.0301	2.49659	2.23799e-08	1.42784e-06	Neuroactive_ligandreceptor_interaction	BmuPB005115;BmuPB015848;BmuPB010875;BmuPB020044;BmuPB006500;BmuPB009312;BmuPB007913;BmuPB010881;BmuPB000643;BmuPB017472;BmuPB006542;BmuPB001831;BmuPB005289;BmuPB000666;BmuPB013571;BmuPB020896;BmuPB011727;BmuPB008925;BmuPB003195;BmuPB011845;BmuPB012761;BmuPB010082;BmuPB020670;BmuPB005116;BmuPB012762;BmuPB006545;BmuPB012149;BmuPB018918;BmuPB007411;BmuPB016539;BmuPB012088;BmuPB020451;BmuPB012616;Bmu…
		map04727	90	25	6.76692	3.69444	3.60989e-07	1.91926e-05	GABAergic_synapse	BmuPB018887;BmuPB020197;BmuPB005115;BmuPB000930;BmuPB010181;BmuPB012761;BmuPB005113;BmuPB005114;BmuPB007910;BmuPB000203;BmuPB010875;BmuPB000227;BmuPB000451;BmuPB005116;BmuPB012762;BmuPB016408;BmuPB013816;BmuPB001395;BmuPB013424;BmuPB015055;BmuPB011843;BmuPB006682;BmuPB011011;BmuPB019503;BmuPB011771;
		map04723	152	33	11.4286	2.8875	7.59075e-07	3.45921e-05	Retrograde_endocannabinoid_signaling	BmuPB018887;BmuPB005115;BmuPB016661;BmuPB010181;BmuPB018163;BmuPB007695;BmuPB005113;BmuPB007910;BmuPB010875;BmuPB017817;BmuPB010881;BmuPB019647;BmuPB017472;BmuPB011011;BmuPB006682;BmuPB011771;BmuPB020197;BmuPB000368;BmuPB012761;BmuPB005114;BmuPB017195;BmuPB000451;BmuPB005116;BmuPB012762;BmuPB013816;BmuPB001395;BmuPB013424;BmuPB004101;BmuPB006545;BmuPB007411;BmuPB013076;BmuPB008949;BmuPB019503;
		map04024	246	44	18.4962	2.37886	1.55753e-06	6.21065e-05	cAMP_signaling_pathway	BmuPB014164;BmuPB014738;BmuPB015062;BmuPB015998;BmuPB006457;BmuPB017817;BmuPB006500;BmuPB005901;BmuPB013658;BmuPB016356;BmuPB020909;BmuPB017472;BmuPB001831;BmuPB005289;BmuPB018964;BmuPB010283;BmuPB014422;BmuPB011011;BmuPB016394;BmuPB004158;BmuPB001814;BmuPB015581;BmuPB011771;BmuPB011581;BmuPB004773;BmuPB009995;BmuPB016882;BmuPB009436;BmuPB011937;BmuPB021642;BmuPB007784;BmuPB018678;BmuPB011026;Bmu…
		map04721	68	20	5.11278	3.91176	2.44039e-06	8.64984e-05	Synaptic_vesicle_cycle	BmuPB018887;BmuPB009170;BmuPB016661;BmuPB010181;BmuPB021224;BmuPB019270;BmuPB017195;BmuPB014916;BmuPB008909;BmuPB019366;BmuPB000451;BmuPB015782;BmuPB009190;BmuPB016049;BmuPB004101;BmuPB010554;BmuPB011843;BmuPB008766;BmuPB009318;BmuPB004489;
		map05032	94	23	7.06767	3.25426	6.28793e-06	0.000200585	Morphine_addiction	BmuPB018887;BmuPB020197;BmuPB005115;BmuPB018862;BmuPB000368;BmuPB010181;BmuPB012708;BmuPB012761;BmuPB005113;BmuPB005114;BmuPB007910;BmuPB010875;BmuPB001622;BmuPB000451;BmuPB005116;BmuPB012762;BmuPB007784;BmuPB013816;BmuPB001395;BmuPB013424;BmuPB006682;BmuPB011011;BmuPB013076;
		map04725	113	25	8.49624	2.94248	1.15476e-05	0.000334882	Cholinergic_synapse	BmuPB018887;BmuPB020197;BmuPB004773;BmuPB003283;BmuPB014426;BmuPB000368;BmuPB018599;BmuPB010181;BmuPB018163;BmuPB007695;BmuPB007910;BmuPB005901;BmuPB000668;BmuPB011026;BmuPB013816;BmuPB001395;BmuPB013424;BmuPB000666;BmuPB011011;BmuPB008766;BmuPB018420;BmuPB005805;BmuPB016544;BmuPB019503;BmuPB011771;
		map04360	175	33	13.1579	2.508	1.41194e-05	0.00037534	Axon_guidance	BmuPB019119;BmuPB006885;BmuPB005901;BmuPB003724;BmuPB018409;BmuPB020902;BmuPB003189;BmuPB020897;BmuPB010283;BmuPB019060;BmuPB018778;BmuPB002497;BmuPB014700;BmuPB018165;BmuPB006954;BmuPB012475;BmuPB020876;BmuPB007185;BmuPB019273;BmuPB017102;BmuPB010680;BmuPB011937;BmuPB011026;BmuPB011701;BmuPB020516;BmuPB005383;BmuPB001609;BmuPB008414;BmuPB009943;BmuPB010347;BmuPB003644;BmuPB006313;BmuPB015325;
		map04713	102	23	7.66917	2.99902	1.94416e-05	0.000477067	Circadian_entrainment	BmuPB020197;BmuPB004773;BmuPB000368;BmuPB018163;BmuPB007695;BmuPB007910;BmuPB013563;BmuPB013658;BmuPB011026;BmuPB013816;BmuPB017472;BmuPB001395;BmuPB013424;BmuPB006545;BmuPB018918;BmuPB014422;BmuPB011011;BmuPB003269;BmuPB013076;BmuPB012088;BmuPB008949;BmuPB003297;BmuPB011771;
		map04020	238	39	17.8947	2.17941	4.4076e-05	0.0010043	Calcium_signaling_pathway	BmuPB018887;BmuPB014738;BmuPB016739;BmuPB018862;BmuPB010181;BmuPB018163;BmuPB007695;BmuPB006885;BmuPB020044;BmuPB006500;BmuPB015378;BmuPB013658;BmuPB020909;BmuPB014212;BmuPB021103;BmuPB014422;BmuPB011011;BmuPB003297;BmuPB012580;BmuPB008925;BmuPB011771;BmuPB011581;BmuPB020197;BmuPB014426;BmuPB018133;BmuPB011166;BmuPB013563;BmuPB011026;BmuPB006825;BmuPB001395;BmuPB012149;BmuPB018918;BmuPB010664;Bmu…
		map05150	96	21	7.21805	2.90937	6.34254e-05	0.00134885	Staphylococcus_aureus_infection	BmuPB013342;BmuPB017929;BmuPB011166;BmuPB013344;BmuPB004501;BmuPB013341;BmuPB009740;BmuPB013022;BmuPB008029;BmuPB015270;BmuPB017519;BmuPB009991;BmuPB021103;BmuPB013343;BmuPB021181;BmuPB012479;BmuPB012476;BmuPB020451;BmuPB006294;BmuPB012580;BmuPB013409;
		map04726	126	25	9.47368	2.63889	7.06769e-05	0.00140912	Serotonergic_synapse	BmuPB003167;BmuPB018887;BmuPB020197;BmuPB014457;BmuPB015062;BmuPB000368;BmuPB010181;BmuPB018163;BmuPB007695;BmuPB007910;BmuPB005116;BmuPB018122;BmuPB012762;BmuPB013816;BmuPB013424;BmuPB011090;BmuPB021430;BmuPB009787;BmuPB021433;BmuPB021431;BmuPB013076;BmuPB021429;BmuPB019503;BmuPB011771;BmuPB021432;
		map04015	247	39	18.5714	2.1	9.82775e-05	0.00176617	Rap1_signaling_pathway	BmuPB015062;BmuPB018163;BmuPB004501;BmuPB006457;BmuPB009092;BmuPB001547;BmuPB005901;BmuPB012946;BmuPB008029;BmuPB013658;BmuPB010881;BmuPB018409;BmuPB010659;BmuPB012793;BmuPB003916;BmuPB007036;BmuPB005289;BmuPB019060;BmuPB011011;BmuPB011397;BmuPB016394;BmuPB011811;BmuPB008440;BmuPB020197;BmuPB011166;BmuPB005615;BmuPB007559;BmuPB004779;BmuPB007257;BmuPB011937;BmuPB006514;BmuPB001062;BmuPB001395;Bmu…
		map05140	77	18	5.78947	3.10909	9.96586e-05	0.00176617	Leishmaniasis	BmuPB004773;BmuPB013342;BmuPB014527;BmuPB019234;BmuPB020680;BmuPB013344;BmuPB004501;BmuPB013341;BmuPB008029;BmuPB015270;BmuPB017519;BmuPB009991;BmuPB021103;BmuPB001455;BmuPB012638;BmuPB013343;BmuPB001814;BmuPB004543;
		map04921	158	28	11.8797	2.35696	0.000133731	0.00224528	Oxytocin_signaling_pathway	BmuPB003283;BmuPB018163;BmuPB007695;BmuPB006885;BmuPB015378;BmuPB014422;BmuPB011011;BmuPB016544;BmuPB017330;BmuPB015581;BmuPB011771;BmuPB014700;BmuPB020683;BmuPB020197;BmuPB004773;BmuPB000368;BmuPB008041;BmuPB018122;BmuPB011026;BmuPB001395;BmuPB000358;BmuPB008842;BmuPB013076;BmuPB020862;BmuPB019503;BmuPB010836;BmuPB010609;BmuPB003644;
		map04662	83	18	6.2406	2.88434	0.000223076	0.00338862	B_cell_receptor_signaling_pathway	BmuPB004773;BmuPB009995;BmuPB004730;BmuPB020769;BmuPB004416;BmuPB006885;BmuPB005901;BmuPB013022;BmuPB011937;BmuPB007257;BmuPB006140;BmuPB018964;BmuPB021103;BmuPB005699;BmuPB001814;BmuPB015581;BmuPB014700;BmuPB003644;
		map04640	106	21	7.96992	2.63491	0.000301991	0.00437888	Hematopoietic_cell_lineage	BmuPB013131;BmuPB013342;BmuPB019234;BmuPB022057;BmuPB013344;BmuPB004501;BmuPB004416;BmuPB013341;BmuPB018424;BmuPB008492;BmuPB010659;BmuPB003313;BmuPB006514;BmuPB012793;BmuPB013427;BmuPB015270;BmuPB003916;BmuPB021103;BmuPB011811;BmuPB013343;BmuPB012159;
		map04010	310	44	23.3083	1.88774	0.000327903	0.00454787	MAPK_signaling_pathway	BmuPB015297;BmuPB006885;BmuPB017817;BmuPB010659;BmuPB012793;BmuPB003916;BmuPB003297;BmuPB015581;BmuPB020683;BmuPB014457;BmuPB017179;BmuPB018175;BmuPB010717;BmuPB005615;BmuPB004779;BmuPB019784;BmuPB013563;BmuPB007257;BmuPB018122;BmuPB006514;BmuPB000358;BmuPB020862;BmuPB006313;BmuPB018887;BmuPB010181;BmuPB001642;BmuPB011787;BmuPB012946;BmuPB018409;BmuPB010283;BmuPB020907;BmuPB014212;BmuPB016303;Bmu…
		map04720	64	15	4.81203	3.11719	0.000355583	0.00472629	Longterm_potentiation	BmuPB020197;BmuPB015062;BmuPB018163;BmuPB007695;BmuPB006885;BmuPB019784;BmuPB013658;BmuPB011026;BmuPB006545;BmuPB018918;BmuPB011011;BmuPB007411;BmuPB012088;BmuPB008949;BmuPB003644;
		map04380	128	23	9.62406	2.38984	0.000569913	0.00727209	Osteoclast_differentiation	BmuPB020680;BmuPB021675;BmuPB006885;BmuPB017817;BmuPB005901;BmuPB007913;BmuPB003916;BmuPB001455;BmuPB001814;BmuPB015581;BmuPB014700;BmuPB004773;BmuPB020769;BmuPB013022;BmuPB006140;BmuPB010048;BmuPB006514;BmuPB008558;BmuPB013214;BmuPB009686;BmuPB001096;BmuPB004543;BmuPB003644;
		map04925	95	19	7.14286	2.66	0.000608438	0.00746506	Aldosterone_synthesis_and_secretion	BmuPB011581;BmuPB020197;BmuPB016882;BmuPB018163;BmuPB007695;BmuPB003727;BmuPB013563;BmuPB011026;BmuPB020909;BmuPB001395;BmuPB014097;BmuPB015778;BmuPB010664;BmuPB011011;BmuPB003297;BmuPB019503;BmuPB017330;BmuPB010609;BmuPB011771;
		map04072	162	26	12.1805	2.13457	0.000865284	0.0102232	Phospholipase_D_signaling_pathway	BmuPB015239;BmuPB015062;BmuPB018163;BmuPB009092;BmuPB005901;BmuPB010659;BmuPB009910;BmuPB012793;BmuPB021103;BmuPB011011;BmuPB016394;BmuPB009754;BmuPB020896;BmuPB011727;BmuPB004158;BmuPB008538;BmuPB009170;BmuPB012718;BmuPB007559;BmuPB018122;BmuPB006273;BmuPB001395;BmuPB007411;BmuPB013034;BmuPB020862;BmuPB018748;
		map04750	103	19	7.74436	2.4534	0.0010059	0.0114601	Inflammatory_mediator_regulation_of_TRP_channels	BmuPB020197;BmuPB003230;BmuPB018163;BmuPB007695;BmuPB003032;BmuPB017817;BmuPB005901;BmuPB018122;BmuPB011026;BmuPB001395;BmuPB015778;BmuPB021430;BmuPB000075;BmuPB011011;BmuPB021433;BmuPB015936;BmuPB021431;BmuPB021429;BmuPB021432;
		map04625	104	19	7.81955	2.42981	0.00108875	0.011577	Ctype_lectin_receptor_signaling_pathway	BmuPB007695;BmuPB006885;BmuPB018613;BmuPB017817;BmuPB005901;BmuPB011349;BmuPB004499;BmuPB010283;BmuPB017519;BmuPB005383;BmuPB000205;BmuPB017523;BmuPB018993;BmuPB013034;BmuPB001814;BmuPB021442;BmuPB015581;BmuPB014700;BmuPB003644;
		map04145	171	27	12.8571	2.1	0.00108578	0.011577	Phagosome	BmuPB020680;BmuPB021224;BmuPB004501;BmuPB008029;BmuPB015270;BmuPB021103;BmuPB001455;BmuPB000386;BmuPB013515;BmuPB013342;BmuPB014527;BmuPB013344;BmuPB015275;BmuPB013341;BmuPB012685;BmuPB013022;BmuPB015782;BmuPB000085;BmuPB009991;BmuPB000893;BmuPB005549;BmuPB013343;BmuPB021442;BmuPB007897;BmuPB006630;BmuPB004543;BmuPB013409;
		map04742	81	16	6.09023	2.62716	0.00115362	0.0118712	Taste_transduction	BmuPB005115;BmuPB015239;BmuPB014426;BmuPB018862;BmuPB010181;BmuPB012761;BmuPB005114;BmuPB009436;BmuPB006093;BmuPB013816;BmuPB004378;BmuPB013424;BmuPB000404;BmuPB007411;BmuPB009787;BmuPB008925;
		map05014	51	12	3.83459	3.12941	0.00129341	0.0128937	Amyotrophic_lateral_sclerosis_ALS	BmuPB014457;BmuPB006545;BmuPB000201;BmuPB018918;BmuPB006885;BmuPB008494;BmuPB012088;BmuPB008949;BmuPB010819;BmuPB013658;BmuPB016189;BmuPB003644;
		map04728	133	22	10	2.2	0.00143627	0.013884	Dopaminergic_synapse	BmuPB014158;BmuPB018887;BmuPB014738;BmuPB010181;BmuPB018163;BmuPB007695;BmuPB007910;BmuPB006885;BmuPB017817;BmuPB013658;BmuPB017472;BmuPB005289;BmuPB011771;BmuPB004773;BmuPB020197;BmuPB000368;BmuPB011026;BmuPB013816;BmuPB013424;BmuPB006545;BmuPB013076;BmuPB008949;
		map00512	33	9	2.4812	3.62727	0.00217424	0.0198167	Mucin_type_Oglycan_biosynthesis	BmuPB008920;BmuPB004535;BmuPB002075;BmuPB000365;BmuPB013458;BmuPB000366;BmuPB017691;BmuPB003669;BmuPB000367;
		map04971	71	14	5.33835	2.62254	0.00230529	0.0204275	Gastric_acid_secretion	BmuPB020197;BmuPB014426;BmuPB018599;BmuPB018163;BmuPB007695;BmuPB020044;BmuPB015378;BmuPB009737;BmuPB010904;BmuPB011026;BmuPB001395;BmuPB011011;BmuPB016539;BmuPB016544;
		map04014	280	37	21.0526	1.7575	0.00263833	0.0227467	Ras_signaling_pathway	BmuPB007910;BmuPB017817;BmuPB005901;BmuPB010659;BmuPB012793;BmuPB003916;BmuPB008440;BmuPB018175;BmuPB005615;BmuPB004779;BmuPB019273;BmuPB007257;BmuPB018122;BmuPB006514;BmuPB013816;BmuPB018918;BmuPB020862;BmuPB006313;BmuPB014981;BmuPB015249;BmuPB001642;BmuPB009092;BmuPB008804;BmuPB012946;BmuPB013658;BmuPB018409;BmuPB010283;BmuPB004158;BmuPB018165;BmuPB013454;BmuPB020197;BmuPB011166;BmuPB011937;Bmu…
		map04610	87	16	6.54135	2.44598	0.00273178	0.0229326	Complement_and_coagulation_cascades	BmuPB001916;BmuPB004501;BmuPB009740;BmuPB009080;BmuPB008029;BmuPB020435;BmuPB016839;BmuPB009991;BmuPB012898;BmuPB021181;BmuPB012476;BmuPB012479;BmuPB020451;BmuPB006294;BmuPB013409;BmuPB004502;
		map05152	206	29	15.4887	1.87233	0.00298001	0.024375	Tuberculosis	BmuPB004501;BmuPB006885;BmuPB017817;BmuPB008029;BmuPB015270;BmuPB021103;BmuPB018993;BmuPB000386;BmuPB006522;BmuPB014457;BmuPB005280;BmuPB013342;BmuPB014527;BmuPB013344;BmuPB013341;BmuPB018613;BmuPB013022;BmuPB011026;BmuPB017519;BmuPB005383;BmuPB000893;BmuPB009991;BmuPB000205;BmuPB005331;BmuPB013034;BmuPB013343;BmuPB021442;BmuPB003644;BmuPB004502;
		map04911	82	15	6.16541	2.43293	0.00393193	0.0305923	Insulin_secretion	BmuPB008690;BmuPB020197;BmuPB014426;BmuPB018163;BmuPB019270;BmuPB008410;BmuPB002394;BmuPB005412;BmuPB011026;BmuPB001395;BmuPB011011;BmuPB014422;BmuPB016394;BmuPB019503;BmuPB011771;
		map00910	18	6	1.35338	4.43333	0.00528559	0.0392117	Nitrogen_metabolism	BmuPB001305;BmuPB019093;BmuPB014579;BmuPB002840;BmuPB015522;BmuPB019451;
		map04070	101	17	7.59398	2.23861	0.00545375	0.0393628	Phosphatidylinositol_signaling_system	BmuPB020197;BmuPB008538;BmuPB019935;BmuPB018133;BmuPB018163;BmuPB007695;BmuPB000945;BmuPB005901;BmuPB007135;BmuPB009910;BmuPB012747;BmuPB018745;BmuPB016157;BmuPB009754;BmuPB000107;BmuPB017812;BmuPB005699;
		map04512	87	15	6.54135	2.2931	0.00559647	0.0393628	ECMreceptor_interaction	BmuPB000041;BmuPB002371;BmuPB019234;BmuPB000042;BmuPB008018;BmuPB012685;BmuPB005796;BmuPB008492;BmuPB003313;BmuPB006941;BmuPB009535;BmuPB000655;BmuPB011811;BmuPB019086;BmuPB008382;
		map05133	77	14	5.78947	2.41818	0.00567615	0.0393628	Pertussis	BmuPB004773;BmuPB014457;BmuPB014527;BmuPB004501;BmuPB017817;BmuPB011349;BmuPB008029;BmuPB004499;BmuPB017519;BmuPB009991;BmuPB021181;BmuPB012476;BmuPB012479;BmuPB013409;
		map04730	63	12	4.73684	2.53333	0.00580489	0.0393991	Longterm_depression	BmuPB006920;BmuPB020197;BmuPB006545;BmuPB011845;BmuPB010181;BmuPB018163;BmuPB007695;BmuPB007411;BmuPB008949;BmuPB015504;BmuPB018122;BmuPB018863;
		map04022	169	24	12.7068	1.88876	0.00655419	0.043289	cGMPPKG_signaling_pathway	BmuPB008690;BmuPB016739;BmuPB018163;BmuPB007695;BmuPB006885;BmuPB006500;BmuPB014868;BmuPB015378;BmuPB020909;BmuPB015302;BmuPB011011;BmuPB015581;BmuPB011771;BmuPB014700;BmuPB011581;BmuPB003948;BmuPB007784;BmuPB001395;BmuPB020516;BmuPB015778;BmuPB010664;BmuPB019503;BmuPB005457;BmuPB003644;
		map04930	48	10	3.60902	2.77083	0.0066494	0.043289	Type_II_diabetes_mellitus	BmuPB018887;BmuPB006825;BmuPB010181;BmuPB015778;BmuPB009744;BmuPB017817;BmuPB005901;BmuPB003297;BmuPB005412;BmuPB011771;
		map04666	96	16	7.21805	2.21667	0.00778192	0.0488915	Fc_gamma_Rmediated_phagocytosis	BmuPB020197;BmuPB009995;BmuPB005901;BmuPB013022;BmuPB009910;BmuPB006273;BmuPB009689;BmuPB018964;BmuPB010283;BmuPB015778;BmuPB021103;BmuPB012638;BmuPB009690;BmuPB004158;BmuPB005699;BmuPB004543;
cerebellum vs brain	GO	GO:0005216	256	44	12.4486	3.53452	3.13468e-11	2.04694e-08	molecular_function:ion channel activity	BmuPB005115;BmuPB007695;BmuPB005176;BmuPB020276;BmuPB008925;BmuPB010775;BmuPB015244;BmuPB011169;BmuPB003781;BmuPB000237;BmuPB010814;BmuPB010641;BmuPB005116;BmuPB004099;BmuPB012456;BmuPB010874;BmuPB002202;BmuPB003929;BmuPB009305;BmuPB010347;BmuPB020593;BmuPB002646;BmuPB001135;BmuPB010181;BmuPB007092;BmuPB018397;BmuPB000408;BmuPB011090;BmuPB003952;BmuPB016525;BmuPB019330;BmuPB013808;BmuPB011771;Bmu…
		GO:0006811	380	54	18.4784	2.92232	1.33841e-10	4.36991e-08	biological_process:ion transport	BmuPB005115;BmuPB019862;BmuPB009576;BmuPB007695;BmuPB007096;BmuPB010875;BmuPB005176;BmuPB020276;BmuPB008925;BmuPB010775;BmuPB015244;BmuPB011169;BmuPB003781;BmuPB000237;BmuPB010814;BmuPB010641;BmuPB005116;BmuPB004099;BmuPB012456;BmuPB010874;BmuPB002202;BmuPB003929;BmuPB009305;BmuPB010347;BmuPB020593;BmuPB002646;BmuPB009383;BmuPB001135;BmuPB010181;BmuPB018397;BmuPB007092;BmuPB012758;BmuPB000408;Bmu…
		GO:0005515	4194	311	203.944	1.52493	8.37476e-10	1.82291e-07	molecular_function:protein binding	BmuPB000189;BmuPB020416;BmuPB012571;BmuPB018964;BmuPB011100;BmuPB010623;BmuPB002151;BmuPB005056;BmuPB016217;BmuPB018061;BmuPB014765;BmuPB007784;BmuPB007588;BmuPB016750;BmuPB019868;BmuPB019511;BmuPB020596;BmuPB001804;BmuPB016232;BmuPB004837;BmuPB003347;BmuPB009701;BmuPB007462;BmuPB001752;BmuPB000358;BmuPB002461;BmuPB017340;BmuPB014884;BmuPB009466;BmuPB008410;BmuPB003730;BmuPB000067;BmuPB000404;Bmu…
		GO:0055085	419	42	20.3749	2.06136	5.12868e-05	0.00837256	biological_process:transmembrane transport	BmuPB004324;BmuPB007695;BmuPB020987;BmuPB018597;BmuPB008793;BmuPB005176;BmuPB010775;BmuPB015244;BmuPB011169;BmuPB003781;BmuPB010814;BmuPB003709;BmuPB010641;BmuPB004099;BmuPB002202;BmuPB012255;BmuPB003929;BmuPB009305;BmuPB010347;BmuPB020593;BmuPB002646;BmuPB006081;BmuPB010181;BmuPB018397;BmuPB007092;BmuPB006190;BmuPB004393;BmuPB000408;BmuPB011090;BmuPB003952;BmuPB019330;BmuPB013808;BmuPB011771;Bmu…
		GO:0043565	603	53	29.3224	1.80749	0.000166314	0.0204333	molecular_function:sequence-specific DNA binding	BmuPB011527;BmuPB008824;BmuPB005025;BmuPB001377;BmuPB011303;BmuPB021430;BmuPB019936;BmuPB002404;BmuPB002269;BmuPB001778;BmuPB000066;BmuPB007860;BmuPB013001;BmuPB010586;BmuPB017193;BmuPB008075;BmuPB003623;BmuPB003805;BmuPB007227;BmuPB020219;BmuPB009102;BmuPB016426;BmuPB009217;BmuPB012985;BmuPB009200;BmuPB018246;BmuPB011218;BmuPB016397;BmuPB019571;BmuPB007475;BmuPB004751;BmuPB007891;BmuPB018247;Bmu…
		GO:0005509	711	60	34.5741	1.7354	0.000187748	0.0204333	molecular_function:calcium ion binding	BmuPB014418;BmuPB006134;BmuPB017275;BmuPB012898;BmuPB010623;BmuPB010346;BmuPB012687;BmuPB005561;BmuPB006133;BmuPB017193;BmuPB005065;BmuPB019123;BmuPB014560;BmuPB001504;BmuPB013402;BmuPB008495;BmuPB015435;BmuPB002175;BmuPB004785;BmuPB011658;BmuPB019111;BmuPB005217;BmuPB015033;BmuPB007256;BmuPB019036;BmuPB013258;BmuPB016185;BmuPB018449;BmuPB020681;BmuPB012285;BmuPB007557;BmuPB001318;BmuPB018143;Bmu…
		GO:0051260	48	10	2.33412	4.28427	0.000319082	0.0260451	biological_process:protein homooligomerization	BmuPB016628;BmuPB014699;BmuPB011090;BmuPB002579;BmuPB005176;BmuPB003952;BmuPB003781;BmuPB003929;BmuPB009305;BmuPB019330;
		GO:0003700	986	76	47.9467	1.58509	0.000373216	0.0270789	molecular_function:transcription factor activity, sequence-specific DNA binding	BmuPB000697;BmuPB011527;BmuPB008824;BmuPB015601;BmuPB000856;BmuPB005025;BmuPB001377;BmuPB011303;BmuPB019936;BmuPB002404;BmuPB012813;BmuPB004166;BmuPB002269;BmuPB001778;BmuPB000066;BmuPB007860;BmuPB013001;BmuPB010586;BmuPB001444;BmuPB014711;BmuPB017193;BmuPB008075;BmuPB003623;BmuPB003805;BmuPB007227;BmuPB020219;BmuPB009102;BmuPB016426;BmuPB013319;BmuPB001402;BmuPB011900;BmuPB009217;BmuPB012985;Bmu…
		GO:0005249	723	59	35.1577	1.67815	0.000415458	0.0271294	molecular_function:voltage-gated potassium channel activity	BmuPB003283;BmuPB000697;BmuPB002178;BmuPB019632;BmuPB006134;BmuPB013740;BmuPB011777;BmuPB017300;BmuPB002404;BmuPB005072;BmuPB010346;BmuPB009891;BmuPB020148;BmuPB018463;BmuPB003929;BmuPB009305;BmuPB003041;BmuPB007950;BmuPB020593;BmuPB017047;BmuPB021432;BmuPB008495;BmuPB006476;BmuPB009360;BmuPB011481;BmuPB003952;BmuPB006138;BmuPB019330;BmuPB002854;BmuPB020115;BmuPB009164;BmuPB000398;BmuPB019571;Bmu…
	KEGG	map04080	293	42	14.2479	2.94781	1.0059e-08	1.46358e-06	Neuroactive_ligandreceptor_interaction	BmuPB005115;BmuPB009576;BmuPB007690;BmuPB002595;BmuPB010875;BmuPB020044;BmuPB006500;BmuPB009312;BmuPB010881;BmuPB017472;BmuPB020276;BmuPB005289;BmuPB012342;BmuPB020896;BmuPB018871;BmuPB008925;BmuPB020670;BmuPB005116;BmuPB012149;BmuPB009321;BmuPB007411;BmuPB012596;BmuPB014132;BmuPB012088;BmuPB012616;BmuPB006920;BmuPB014738;BmuPB015239;BmuPB000695;BmuPB021402;BmuPB012758;BmuPB008540;BmuPB006682;Bmu…
		map05033	40	13	1.9451	6.68346	7.09608e-07	6.8832e-05	Nicotine_addiction	BmuPB005115;BmuPB017472;BmuPB020276;BmuPB009576;BmuPB010181;BmuPB007815;BmuPB006682;BmuPB005114;BmuPB017195;BmuPB010875;BmuPB012088;BmuPB012758;BmuPB005116;
		map04723	152	23	7.39138	3.11173	8.24985e-06	0.000600177	Retrograde_endocannabinoid_signaling	BmuPB005115;BmuPB009576;BmuPB010181;BmuPB007695;BmuPB010875;BmuPB012758;BmuPB010881;BmuPB005909;BmuPB017472;BmuPB020276;BmuPB006682;BmuPB015212;BmuPB005908;BmuPB011771;BmuPB015244;BmuPB000368;BmuPB005114;BmuPB017195;BmuPB010641;BmuPB005116;BmuPB013816;BmuPB010568;BmuPB007411;
		map04724	121	19	5.88393	3.22914	3.04062e-05	0.00176964	Glutamatergic_synapse	BmuPB015239;BmuPB015244;BmuPB000368;BmuPB010181;BmuPB007695;BmuPB007690;BmuPB017195;BmuPB006885;BmuPB014873;BmuPB018122;BmuPB013816;BmuPB017472;BmuPB014996;BmuPB015055;BmuPB007815;BmuPB007411;BmuPB008494;BmuPB012088;BmuPB011771;
		map04742	81	15	3.93883	3.80824	3.85321e-05	0.0018688	Taste_transduction	BmuPB005115;BmuPB015239;BmuPB015244;BmuPB014426;BmuPB018862;BmuPB009576;BmuPB010181;BmuPB005114;BmuPB012758;BmuPB013816;BmuPB020276;BmuPB009585;BmuPB000404;BmuPB007411;BmuPB008925;
		map05032	94	16	4.57098	3.50034	5.31809e-05	0.00221081	Morphine_addiction	BmuPB005115;BmuPB018862;BmuPB009576;BmuPB000368;BmuPB010181;BmuPB005114;BmuPB010875;BmuPB012758;BmuPB015942;BmuPB005116;BmuPB007784;BmuPB013816;BmuPB020276;BmuPB009321;BmuPB006682;BmuPB009339;
		map04726	126	18	6.12706	2.93779	0.000141604	0.00515086	Serotonergic_synapse	BmuPB003167;BmuPB015244;BmuPB000368;BmuPB010181;BmuPB007695;BmuPB014000;BmuPB002595;BmuPB010641;BmuPB005116;BmuPB018122;BmuPB013816;BmuPB011090;BmuPB021430;BmuPB009585;BmuPB010568;BmuPB021062;BmuPB011771;BmuPB021432;
		map04921	158	20	7.68314	2.6031	0.000269924	0.00872754	Oxytocin_signaling_pathway	BmuPB003283;BmuPB007695;BmuPB006885;BmuPB011777;BmuPB005072;BmuPB017330;BmuPB015581;BmuPB011771;BmuPB015244;BmuPB000368;BmuPB018568;BmuPB010641;BmuPB018122;BmuPB003382;BmuPB000358;BmuPB008842;BmuPB004390;BmuPB010568;BmuPB013540;BmuPB021054;
		map04727	90	13	4.37647	2.97043	0.00101905	0.0247119	GABAergic_synapse	BmuPB005115;BmuPB009576;BmuPB010181;BmuPB005114;BmuPB010875;BmuPB010641;BmuPB012758;BmuPB005116;BmuPB013816;BmuPB015055;BmuPB020276;BmuPB006682;BmuPB011771;
		map04725	113	15	5.49491	2.7298	0.000955859	0.0247119	Cholinergic_synapse	BmuPB003283;BmuPB015244;BmuPB014426;BmuPB000368;BmuPB010181;BmuPB007695;BmuPB016951;BmuPB010641;BmuPB005901;BmuPB004099;BmuPB013816;BmuPB008540;BmuPB012255;BmuPB013540;BmuPB011771;
		map04020	238	24	11.5733	2.07373	0.00172517	0.0386172	Calcium_signaling_pathway	BmuPB014738;BmuPB018862;BmuPB010181;BmuPB007695;BmuPB002595;BmuPB006885;BmuPB020044;BmuPB006500;BmuPB021103;BmuPB013808;BmuPB008925;BmuPB011771;BmuPB015244;BmuPB014426;BmuPB009908;BmuPB011166;BmuPB016951;BmuPB010641;BmuPB012149;BmuPB009321;BmuPB007411;BmuPB014132;BmuPB012088;BmuPB021062;
		map04730	63	10	3.06353	3.26421	0.00201361	0.0418544	Longterm_depression	BmuPB006920;BmuPB015244;BmuPB010181;BmuPB007695;BmuPB014000;BmuPB007411;BmuPB019210;BmuPB015504;BmuPB018122;BmuPB018863;
		map04728	133	16	6.46746	2.47392	0.00245587	0.0476439	Dopaminergic_synapse	BmuPB018605;BmuPB014738;BmuPB010181;BmuPB007695;BmuPB006885;BmuPB017472;BmuPB005289;BmuPB015212;BmuPB011771;BmuPB012797;BmuPB006483;BmuPB015244;BmuPB000368;BmuPB013816;BmuPB009321;BmuPB007815;
brainstem vs brain	GO	GO:0005515	4194	227	146.66	1.54779	5.34199e-08	3.04493e-05	molecular_function:protein binding	BmuPB020071;BmuPB005618;BmuPB013165;BmuPB011100;BmuPB021123;BmuPB004734;BmuPB015050;BmuPB020197;BmuPB016232;BmuPB003347;BmuPB009701;BmuPB008527;BmuPB004156;BmuPB014863;BmuPB009534;BmuPB002777;BmuPB002461;BmuPB015249;BmuPB014911;BmuPB007265;BmuPB015777;BmuPB006675;BmuPB002033;BmuPB017847;BmuPB009466;BmuPB003730;BmuPB000404;BmuPB019514;BmuPB016042;BmuPB004331;BmuPB001140;BmuPB018164;BmuPB015942;Bmu…
		GO:0005216	256	25	8.95208	2.79265	1.58359e-05	0.00371162	molecular_function:ion channel activity	BmuPB018123;BmuPB005176;BmuPB020276;BmuPB014422;BmuPB001493;BmuPB003297;BmuPB011169;BmuPB010814;BmuPB010641;BmuPB005116;BmuPB004099;BmuPB020516;BmuPB009305;BmuPB020593;BmuPB000668;BmuPB014682;BmuPB011011;BmuPB019330;BmuPB016580;BmuPB016052;BmuPB000398;BmuPB015578;BmuPB000404;BmuPB010568;BmuPB019722;
		GO:0005543	247	24	8.63736	2.77863	2.47501e-05	0.00371162	molecular_function:phospholipid binding	BmuPB005701;BmuPB009701;BmuPB015249;BmuPB001342;BmuPB001642;BmuPB015681;BmuPB017216;BmuPB011100;BmuPB006675;BmuPB017096;BmuPB016360;BmuPB017997;BmuPB018512;BmuPB009170;BmuPB009534;BmuPB020769;BmuPB006058;BmuPB021148;BmuPB020668;BmuPB000400;BmuPB016368;BmuPB000335;BmuPB014151;BmuPB003347;
		GO:0043565	603	44	21.0864	2.08666	2.60464e-05	0.00371162	molecular_function:sequence-specific DNA binding	BmuPB011527;BmuPB008824;BmuPB001377;BmuPB002404;BmuPB001778;BmuPB010521;BmuPB003623;BmuPB017771;BmuPB007227;BmuPB002067;BmuPB009217;BmuPB015050;BmuPB009200;BmuPB018246;BmuPB004773;BmuPB016397;BmuPB003931;BmuPB007891;BmuPB018247;BmuPB018774;BmuPB001070;BmuPB018345;BmuPB003343;BmuPB003341;BmuPB010770;BmuPB000480;BmuPB016373;BmuPB006491;BmuPB001224;BmuPB003344;BmuPB016372;BmuPB013160;BmuPB012811;Bmu…
		GO:0006811	380	31	13.2882	2.33289	5.17617e-05	0.00590084	biological_process:ion transport	BmuPB009576;BmuPB018123;BmuPB005176;BmuPB020276;BmuPB014422;BmuPB001493;BmuPB003297;BmuPB011169;BmuPB010814;BmuPB010641;BmuPB005116;BmuPB004099;BmuPB020516;BmuPB009305;BmuPB020593;BmuPB000668;BmuPB014682;BmuPB018254;BmuPB006682;BmuPB011011;BmuPB019330;BmuPB019463;BmuPB002735;BmuPB016580;BmuPB016052;BmuPB005114;BmuPB000398;BmuPB015578;BmuPB000404;BmuPB010568;BmuPB019722;
		GO:0004713	415	32	14.5122	2.20505	0.000109422	0.00891008	molecular_function:protein tyrosine kinase activity	BmuPB008101;BmuPB006324;BmuPB012793;BmuPB001002;BmuPB018778;BmuPB015212;BmuPB011695;BmuPB011168;BmuPB015849;BmuPB019273;BmuPB010467;BmuPB006518;BmuPB000996;BmuPB006514;BmuPB015778;BmuPB013402;BmuPB018350;BmuPB003041;BmuPB014911;BmuPB015378;BmuPB015530;BmuPB018165;BmuPB020197;BmuPB020906;BmuPB020769;BmuPB020099;BmuPB011026;BmuPB003975;BmuPB015499;BmuPB002694;BmuPB006963;BmuPB010609;
		GO:0004879	297	25	10.3858	2.40713	0.000154025	0.00975495	molecular_function:RNA polymerase II transcription factor activity, ligand-activated sequence-specific DNA binding	BmuPB008915;BmuPB011430;BmuPB017850;BmuPB001002;BmuPB010770;BmuPB017179;BmuPB020176;BmuPB004457;BmuPB009898;BmuPB009668;BmuPB016768;BmuPB010603;BmuPB002067;BmuPB016372;BmuPB006107;BmuPB017083;BmuPB007584;BmuPB001001;BmuPB020679;BmuPB000133;BmuPB005075;BmuPB021035;BmuPB008477;BmuPB007725;BmuPB017959;
		GO:0035556	259	23	9.05699	2.53947	0.000173496	0.00988925	biological_process:intracellular signal transduction	BmuPB010554;BmuPB016394;BmuPB008538;BmuPB009534;BmuPB018175;BmuPB014916;BmuPB007859;BmuPB015778;BmuPB014151;BmuPB001906;BmuPB011006;BmuPB011909;BmuPB008473;BmuPB017075;BmuPB017783;BmuPB011011;BmuPB011720;BmuPB006675;BmuPB007491;BmuPB017997;BmuPB020197;BmuPB020769;BmuPB006032;
		GO:0000976	185	17	6.46928	2.6278	0.000611887	0.0290646	molecular_function:transcription regulatory region sequence-specific DNA binding	BmuPB011527;BmuPB016371;BmuPB003343;BmuPB016398;BmuPB009217;BmuPB003341;BmuPB009200;BmuPB016373;BmuPB016397;BmuPB003342;BmuPB010704;BmuPB003344;BmuPB007891;BmuPB017771;BmuPB018774;BmuPB007227;BmuPB016372;
		GO:0007165	669	42	23.3943	1.79531	0.000765186	0.0290771	biological_process:signal transduction	BmuPB019514;BmuPB016191;BmuPB010693;BmuPB013165;BmuPB001377;BmuPB016394;BmuPB007154;BmuPB015942;BmuPB018623;BmuPB020593;BmuPB012784;BmuPB017083;BmuPB011909;BmuPB000760;BmuPB017783;BmuPB007485;BmuPB014900;BmuPB008952;BmuPB000400;BmuPB003269;BmuPB000335;BmuPB009701;BmuPB006135;BmuPB011973;BmuPB004683;BmuPB021001;BmuPB010814;BmuPB020651;BmuPB014151;BmuPB012708;BmuPB001584;BmuPB010834;BmuPB002875;Bmu…
		GO:0004970	17	5	0.594474	8.4108	0.000726764	0.0290771	molecular_function:ionotropic glutamate receptor activity	BmuPB012088;BmuPB008949;BmuPB018918;BmuPB007815;BmuPB013658;
		GO:0005234	17	5	0.594474	8.4108	0.000726764	0.0290771	molecular_function:extracellular-glutamate-gated ion channel activity	BmuPB012088;BmuPB008949;BmuPB018918;BmuPB007815;BmuPB013658;
	KEGG	map04080	293	34	10.2459	3.31839	1.44829e-08	1.94795e-06	Neuroactive_ligandreceptor_interaction	BmuPB009576;BmuPB020044;BmuPB007913;BmuPB000643;BmuPB020276;BmuPB001831;BmuPB013571;BmuPB011727;BmuPB018871;BmuPB003195;BmuPB017338;BmuPB017446;BmuPB011845;BmuPB005116;BmuPB011301;BmuPB018918;BmuPB009321;BmuPB016539;BmuPB012088;BmuPB020451;BmuPB013658;BmuPB018677;BmuPB008540;BmuPB006682;BmuPB019463;BmuPB012580;BmuPB014426;BmuPB005114;BmuPB016951;BmuPB008952;BmuPB007067;BmuPB007815;BmuPB007031;Bmu…
		map05033	40	11	1.39876	7.86409	9.49629e-07	8.51501e-05	Nicotine_addiction	BmuPB016661;BmuPB020276;BmuPB009576;BmuPB018918;BmuPB007815;BmuPB006682;BmuPB005114;BmuPB012088;BmuPB008949;BmuPB005116;BmuPB013658;
		map04724	121	18	4.23126	4.25405	1.38716e-06	9.32867e-05	Glutamatergic_synapse	BmuPB020197;BmuPB016615;BmuPB016661;BmuPB003109;BmuPB017847;BmuPB018581;BmuPB006885;BmuPB002171;BmuPB015056;BmuPB013658;BmuPB014996;BmuPB002405;BmuPB018918;BmuPB007815;BmuPB011011;BmuPB011727;BmuPB012088;BmuPB008949;
		map05031	65	13	2.27299	5.71934	2.27288e-06	0.000122281	Amphetamine_addiction	BmuPB020197;BmuPB004773;BmuPB018605;BmuPB006885;BmuPB019888;BmuPB013658;BmuPB011026;BmuPB004560;BmuPB018918;BmuPB009321;BmuPB007815;BmuPB012088;BmuPB008949;
		map05030	47	11	1.64355	6.69284	3.64079e-06	0.000163229	Cocaine_addiction	BmuPB018605;BmuPB018918;BmuPB009321;BmuPB002899;BmuPB003109;BmuPB007815;BmuPB008449;BmuPB011727;BmuPB012088;BmuPB008949;BmuPB013658;
		map04360	175	20	6.11959	3.26819	1.3853e-05	0.000532349	Axon_guidance	BmuPB005701;BmuPB006885;BmuPB003724;BmuPB018409;BmuPB020897;BmuPB015383;BmuPB010834;BmuPB018778;BmuPB015530;BmuPB012472;BmuPB018165;BmuPB006954;BmuPB011168;BmuPB017426;BmuPB007185;BmuPB019273;BmuPB006133;BmuPB011026;BmuPB020516;BmuPB009943;
		map04911	82	13	2.86747	4.53362	2.09244e-05	0.000703582	Insulin_secretion	BmuPB020197;BmuPB014426;BmuPB014900;BmuPB010641;BmuPB014907;BmuPB002171;BmuPB005412;BmuPB011026;BmuPB004560;BmuPB011011;BmuPB014422;BmuPB016306;BmuPB016394;
		map04010	310	28	10.8404	2.58293	2.57855e-05	0.0007707	MAPK_signaling_pathway	BmuPB017850;BmuPB015297;BmuPB006885;BmuPB012793;BmuPB011777;BmuPB015212;BmuPB006465;BmuPB010770;BmuPB003297;BmuPB017179;BmuPB018175;BmuPB010641;BmuPB006514;BmuPB003989;BmuPB018350;BmuPB020195;BmuPB001642;BmuPB005568;BmuPB018409;BmuPB020907;BmuPB016303;BmuPB015530;BmuPB020197;BmuPB004773;BmuPB008449;BmuPB004390;BmuPB002694;BmuPB010836;
		map04020	238	23	8.32264	2.76355	3.87171e-05	0.000946809	Calcium_signaling_pathway	BmuPB016739;BmuPB006885;BmuPB020044;BmuPB010693;BmuPB002171;BmuPB015378;BmuPB013658;BmuPB014422;BmuPB011011;BmuPB003297;BmuPB012580;BmuPB017446;BmuPB020197;BmuPB015849;BmuPB014426;BmuPB018133;BmuPB016951;BmuPB010641;BmuPB011026;BmuPB011301;BmuPB018918;BmuPB009321;BmuPB012088;
		map05014	51	10	1.78342	5.60719	3.77762e-05	0.000946809	Amyotrophic_lateral_sclerosis_ALS	BmuPB018918;BmuPB015864;BmuPB007815;BmuPB015212;BmuPB006885;BmuPB012088;BmuPB008949;BmuPB010819;BmuPB013658;BmuPB016189;
		map04921	158	17	5.52512	3.07686	0.000113813	0.00240558	Oxytocin_signaling_pathway	BmuPB006885;BmuPB002171;BmuPB015378;BmuPB011777;BmuPB014422;BmuPB011011;BmuPB020197;BmuPB004773;BmuPB008366;BmuPB010641;BmuPB011026;BmuPB004390;BmuPB010568;BmuPB013540;BmuPB010836;BmuPB010609;BmuPB020195;
		map04725	113	14	3.95151	3.54295	0.000116255	0.00240558	Cholinergic_synapse	BmuPB020197;BmuPB004773;BmuPB008366;BmuPB014426;BmuPB016951;BmuPB010641;BmuPB002171;BmuPB004099;BmuPB000668;BmuPB011026;BmuPB008540;BmuPB011011;BmuPB008766;BmuPB013540;
		map04713	102	13	3.56685	3.64468	0.000155373	0.00298538	Circadian_entrainment	BmuPB020197;BmuPB004773;BmuPB002171;BmuPB013658;BmuPB011026;BmuPB018918;BmuPB007815;BmuPB014422;BmuPB011011;BmuPB003269;BmuPB012088;BmuPB008949;BmuPB003297;
		map04720	64	10	2.23802	4.46823	0.000201127	0.00360688	Longterm_potentiation	BmuPB020197;BmuPB006885;BmuPB002171;BmuPB013658;BmuPB011026;BmuPB018918;BmuPB007815;BmuPB011011;BmuPB012088;BmuPB008949;
		map04723	152	16	5.3153	3.01018	0.000222562	0.00374182	Retrograde_endocannabinoid_signaling	BmuPB016661;BmuPB009576;BmuPB019648;BmuPB002171;BmuPB005909;BmuPB020276;BmuPB011011;BmuPB006682;BmuPB015212;BmuPB020197;BmuPB005114;BmuPB010641;BmuPB005116;BmuPB004101;BmuPB010568;BmuPB008949;
		map04015	247	22	8.63736	2.54707	0.000243147	0.00384745	Rap1_signaling_pathway	BmuPB013436;BmuPB004501;BmuPB002171;BmuPB013658;BmuPB018409;BmuPB012793;BmuPB007036;BmuPB011011;BmuPB015212;BmuPB011397;BmuPB006465;BmuPB016394;BmuPB015530;BmuPB008440;BmuPB020197;BmuPB006514;BmuPB021148;BmuPB018918;BmuPB007815;BmuPB009686;BmuPB003989;BmuPB003347;
		map04721	68	10	2.3779	4.2054	0.00031133	0.00465265	Synaptic_vesicle_cycle	BmuPB009170;BmuPB016661;BmuPB014916;BmuPB014900;BmuPB016049;BmuPB004101;BmuPB004560;BmuPB010554;BmuPB008766;BmuPB009318;
		map05032	94	11	3.28709	3.34642	0.000917338	0.0126373	Morphine_addiction	BmuPB020197;BmuPB009576;BmuPB012708;BmuPB005114;BmuPB010693;BmuPB015942;BmuPB005116;BmuPB020276;BmuPB009321;BmuPB006682;BmuPB011011;
		map04925	95	11	3.32206	3.3112	0.000992341	0.0127114	Aldosterone_synthesis_and_secretion	BmuPB020197;BmuPB010641;BmuPB015942;BmuPB002171;BmuPB011026;BmuPB021179;BmuPB015778;BmuPB011011;BmuPB010770;BmuPB003297;BmuPB010609;
		map04014	280	22	9.79134	2.24688	0.0010853	0.0132702	Ras_signaling_pathway	BmuPB012793;BmuPB006465;BmuPB008440;BmuPB018175;BmuPB019273;BmuPB006514;BmuPB018918;BmuPB003989;BmuPB018350;BmuPB015249;BmuPB001642;BmuPB013658;BmuPB018409;BmuPB015530;BmuPB007491;BmuPB017997;BmuPB018165;BmuPB020197;BmuPB021148;BmuPB007815;BmuPB008449;BmuPB002694;
		map04728	133	13	4.65089	2.79516	0.00152121	0.0176624	Dopaminergic_synapse	BmuPB014158;BmuPB018605;BmuPB006885;BmuPB002171;BmuPB013658;BmuPB015212;BmuPB004773;BmuPB020197;BmuPB011026;BmuPB009321;BmuPB007815;BmuPB008949;BmuPB019949;
		map04971	71	9	2.4828	3.62493	0.00157583	0.0176624	Gastric_acid_secretion	BmuPB020197;BmuPB014426;BmuPB020044;BmuPB002171;BmuPB015378;BmuPB009737;BmuPB011026;BmuPB011011;BmuPB016539;
		map04727	90	10	3.14722	3.17741	0.00217857	0.0229272	GABAergic_synapse	BmuPB020197;BmuPB009576;BmuPB005114;BmuPB010641;BmuPB005116;BmuPB015056;BmuPB016408;BmuPB020276;BmuPB006682;BmuPB011011;
		map05412	75	9	2.62268	3.4316	0.00221601	0.0229272	Arrhythmogenic_right_ventricular_cardiomyopathy_ARVC	BmuPB014418;BmuPB010641;BmuPB011777;BmuPB012780;BmuPB014422;BmuPB004390;BmuPB017335;BmuPB010836;BmuPB020195;
		map04072	162	14	5.66499	2.47132	0.00294665	0.0293574	Phospholipase_D_signaling_pathway	BmuPB013436;BmuPB002214;BmuPB012793;BmuPB011011;BmuPB016394;BmuPB011727;BmuPB007491;BmuPB018984;BmuPB008538;BmuPB008366;BmuPB009170;BmuPB015849;BmuPB007859;BmuPB020668;
		map04261	152	13	5.3153	2.44577	0.00440188	0.0422895	Adrenergic_signaling_in_cardiomyocytes	BmuPB002171;BmuPB011777;BmuPB014422;BmuPB011011;BmuPB001140;BmuPB015212;BmuPB016394;BmuPB008366;BmuPB010641;BmuPB011026;BmuPB004390;BmuPB010836;BmuPB020195;
